# Supplementary material for: Accurate estimation of intraspecific microbial gene content variation in metagenomic data with MIDAS v3 and StrainPGC
Source: HighWire-hosted journal article supplement (doi:10.1101/gr.279543.124), 2025-04-10
Supplement: Supplemental_Code.zip [file coverpage.docx]

Accurate estimation of intraspecific microbial gene content variation in metagenomic data with MIDAS v3 and StrainPGC

Byron J. Smith A (ORCID: 0000-0002-0182-404X)

Chunyu Zhao B (ORCID: 0000-0001-9589-2416)

Veronika Dubinkina A (ORCID: 0000-0002-4844-6795)
Xiaofan Jin C (ORCID: 0000-0002-0802-7692)
Liron Zahavi D,E (ORCID: 0000-0001-8867-1287)
Saar Shoer D,E (ORCID: 0000-0003-0883-1434)

Jacqueline Moltzau-Anderson F,G (ORCID: 0000-0003-1398-5980)
Eran Segal D,E

Katherine S. Pollard A,B,H,* (ORCID: 0000-0002-9870-6196)

A The Gladstone Institute of Data Science and Biotechnology, San Francisco, CA, USA
B Chan-Zuckerberg Biohub San Francisco, San Francisco, CA, USA
C Department of Biomedical Engineering, University of Calgary, Calgary, AB, Canada
D Department of Computer Science and Applied Mathematics, Weizmann Institute of Science, Rehovot, Israel
E Department of Molecular Cell Biology, Weizmann Institute of Science, Rehovot, Israel
F Department of Gastroenterology, University of California, San Francisco, CA, USA
G Benioff Center for Microbiome Medicine, Department of Medicine, University of California San Francisco, San Francisco, CA, USA
H Department of Epidemiology and Biostatistics, University of California, San Francisco, CA, USA

* Corresponding author:
[katherine.pollard@gladstone.ucsf.edu](mailto:katherine.pollard@gladstone.ucsf.edu)

**Running Title:** Microbial gene content with MIDAS and StrainPGC
