# Supplementary material for: Accurate estimation of intraspecific microbial gene content variation in metagenomic data with MIDAS v3 and StrainPGC
Source: HighWire-hosted journal article supplement (doi:10.1101/gr.279543.124), 2025-04-10
Supplement: Supplemental_Table_S1.xlsx [file Supplemental_Table_S1.xlsx]

## Sheet: Table S1
species_strain	species	num_gene	num_strain_sample	sum_strain_depth	species_gene_frac	log_selected_gene_depth_ratio_std	num_geno_positions
100003_1	100003	4223	32	67.4794	0.99334	0.208484	975
100003_11	100003	4415	11	38.7574	0.989534	0.206089	823
100003_12	100003	4958	24	137.794	0.994291	0.206487	994
100003_131	100003	3870	6	9.34172	0.951475	0.208321	966
100003_15	100003	3266	3	9.64277	0.955281	0.202516	888
100003_2	100003	4160	6	60.9728	0.995243	0.194997	970
100003_20	100003	4294	6	10.5311	0.969553	0.206685	205
100003_28	100003	3790	8	24.3718	0.982873	0.195638	272
100003_3	100003	3650	11	26.7467	0.979068	0.205387	867
100003_30	100003	3600	12	27.0483	0.978116	0.207364	237
100003_33	100003	4560	10	33.6832	0.991437	0.2001	878
100003_35	100003	3315	4	10.2847	0.969553	0.195885	856
100003_36	100003	3981	12	38.0332	0.986679	0.198205	879
100003_4	100003	4158	8	23.1929	0.987631	0.201216	440
100003_45	100003	4516	11	21.5502	0.97431	0.214399	427
100003_47	100003	3397	11	22.9277	0.986679	0.213399	894
100003_59	100003	4143	10	15.7843	0.979068	0.222832	872
100003_6	100003	3968	38	192.519	0.996194	0.194704	891
100003_64	100003	3820	10	13.6858	0.961941	0.214671	337
100003_7	100003	4271	33	66.5816	0.991437	0.207231	120
100003_9	100003	3662	7	26.3669	0.986679	0.192035	141
100003_98	100003	3555	7	16.4377	0.972407	0.193383	582
100013_1	100013	4219	6	164.927	0.97479	0.187971	15170
100013_2	100013	4306	3	32.2476	0.973739	0.184409	6774
100016_0	100016	3058	7	18.4368	0.995763	0.171649	81492
100016_1	100016	3035	36	39.948	0.997458	0.169079	76834
100016_16	100016	2918	11	29.6483	0.997458	0.157175	80953
100016_19	100016	3030	20	26.8282	0.997458	0.162591	76954
100016_2	100016	2816	13	11.4934	0.982203	0.164752	79204
100016_21	100016	2790	13	20.8945	0.994915	0.159585	64811
100016_25	100016	2864	8	14.759	0.997458	0.16252	17725
100016_3	100016	2972	18	28.0899	0.995763	0.158859	80477
100016_6	100016	2896	10	11.8902	0.990678	0.166903	4663
100016_8	100016	2888	11	8.95293	0.982203	0.165041	16704
100018_1	100018	2567	13	26.2644	0.981258	0.170301	29099
100018_3	100018	2536	8	21.5427	0.98929	0.172216	22139
100022_0	100022	3033	12	588.743	0.997783	0.182402	7369
100022_1	100022	3235	21	228.452	1	0.184525	7298
100022_10	100022	3504	10	334.407	1	0.186508	7100
100022_100	100022	3740	8	70.8795	1	0.190754	6129
100022_101	100022	3782	1	4.08773	0.978936	0.205214	6098
100022_104	100022	3306	6	73.1054	0.996674	0.187706	4266
100022_105	100022	4252	10	48.2469	0.998891	0.201804	8605
100022_11	100022	3070	3	182.395	0.997783	0.183292	6725
100022_111	100022	4069	10	40.7283	0.997783	0.207907	7181
100022_113	100022	3693	4	21.0505	0.998891	0.194059	8060
100022_117	100022	3966	10	37.5522	0.997783	0.19263	7071
100022_118	100022	3868	5	68.4035	1	0.201619	7052
100022_12	100022	3983	5	107.421	0.998891	0.206155	7244
100022_120	100022	3920	3	42.0208	1	0.206087	7114
100022_121	100022	4197	3	34.1363	0.998891	0.197007	7010
100022_125	100022	3537	1	5.78486	0.994457	0.197868	7235
100022_127	100022	3248	2	20.844	0.996674	0.18901	6981
100022_13	100022	3098	23	417.177	0.997783	0.183732	7034
100022_14	100022	4514	8	115.293	1	0.214733	6806
100022_146	100022	3357	6	12.4586	0.988914	0.192272	7707
100022_15	100022	3685	22	74.045	0.998891	0.193948	6865
100022_151	100022	3756	8	44.1289	1	0.190661	7109
100022_152	100022	4546	6	18.7964	0.998891	0.20829	7115
100022_156	100022	4582	1	2.12742	0.962306	0.238483	8018
100022_164	100022	3440	1	4.61231	0.985588	0.197677	7002
100022_166	100022	3805	8	51.9788	1	0.196036	7081
100022_167	100022	3422	1	13.8581	0.997783	0.192047	5984
100022_173	100022	4424	9	55.1404	1	0.235473	6887
100022_18	100022	3777	3	41.9371	0.998891	0.193355	7374
100022_19	100022	3724	9	68.2851	0.998891	0.189896	7030
100022_190	100022	3229	4	56.0251	0.997783	0.188184	5017
100022_214	100022	3373	3	11.1579	0.992239	0.194282	7376
100022_22	100022	4307	8	33.4936	1	0.213916	6830
100022_23	100022	4033	9	65.957	0.998891	0.198732	6979
100022_25	100022	4059	5	33.6737	0.995565	0.213819	7711
100022_26	100022	3524	8	102.894	0.998891	0.188868	8394
100022_299	100022	4135	3	3.50995	0.967849	0.21914	6932
100022_30	100022	4560	6	87.6605	1	0.215529	7749
100022_31	100022	4819	12	95.666	0.998891	0.211629	4621
100022_32	100022	3840	11	39.6383	0.998891	0.19167	7323
100022_36	100022	3914	21	122.673	0.998891	0.193149	6239
100022_38	100022	4311	10	31.7109	0.997783	0.205112	5364
100022_39	100022	3903	9	51.099	0.997783	0.197338	7042
100022_4	100022	3209	13	175.128	1	0.18891	3604
100022_40	100022	3503	6	113.856	0.998891	0.186097	7189
100022_41	100022	3479	6	58.8459	0.997783	0.192223	8001
100022_42	100022	3833	12	245.574	0.998891	0.19223	7568
100022_43	100022	3443	3	14.2978	0.995565	0.185825	7714
100022_44	100022	2977	13	34.8667	0.997783	0.212706	7327
100022_46	100022	3896	1	3.34435	0.980044	0.219107	8022
100022_50	100022	3973	15	128.768	0.998891	0.195631	6988
100022_51	100022	4715	3	19.0314	0.998891	0.212849	7138
100022_53	100022	4028	9	44.1694	0.998891	0.193915	7100
100022_54	100022	3790	2	2.28598	0.95122	0.21496	7729
100022_55	100022	3363	5	25.0911	0.998891	0.190572	6899
100022_56	100022	3589	11	65.6574	0.998891	0.190647	7158
100022_58	100022	3404	1	13.7247	1	0.190948	5862
100022_6	100022	2830	16	493.666	0.982262	0.184246	1248
100022_60	100022	4321	8	32.3349	1	0.199827	7007
100022_62	100022	4292	21	173.621	1	0.202653	7006
100022_63	100022	4763	14	46.3954	0.998891	0.215434	7081
100022_64	100022	3859	13	66.3381	0.998891	0.190916	7301
100022_67	100022	3710	1	2.09534	0.960089	0.212093	7793
100022_68	100022	4933	10	22.5256	0.996674	0.220993	8232
100022_69	100022	3939	2	3.96572	0.98337	0.205161	3671
100022_7	100022	3303	12	225.333	1	0.185556	7547
100022_73	100022	3634	2	27.8426	0.997783	0.19499	6546
100022_77	100022	3517	1	16.3482	0.995565	0.188614	3745
100022_80	100022	3954	5	42.9055	1	0.19047	6625
100022_84	100022	3435	9	64.5698	0.998891	0.184211	7626
100022_86	100022	3782	16	66.0495	1	0.192106	7241
100022_89	100022	3549	7	30.665	0.997783	0.19171	5096
100022_91	100022	4107	9	61.7744	1	0.198228	6285
100022_92	100022	3509	5	26.6058	0.997783	0.192625	7270
100022_93	100022	4038	12	107.398	0.997783	0.196383	7270
100022_96	100022	4760	8	14.1664	0.995565	0.242074	6933
100022_97	100022	3297	7	33.9351	0.997783	0.18882	7057
100022_98	100022	4600	9	13.5559	0.991131	0.20731	5579
100027_4	100027	2729	5	58.5306	0.979526	0.236272	62844
100028_0	100028	2340	11	18.592	0.985799	0.184716	16131
100028_1	100028	2224	9	11.4232	0.973964	0.183257	16017
100028_10	100028	2364	14	59.4654	0.990533	0.180351	16094
100028_12	100028	2226	16	13.3568	0.983432	0.182304	1571
100028_18	100028	2247	12	7.67671	0.96568	0.189071	16171
100028_19	100028	2196	8	7.76601	0.970414	0.180228	4243
100028_2	100028	2253	9	18.2738	0.989349	0.18134	4587
100028_27	100028	2230	11	9.72893	0.970414	0.187993	15999
100028_34	100028	2258	7	18.469	0.989349	0.181285	15899
100028_39	100028	2144	6	5.46122	0.956213	0.188273	1016
100028_4	100028	2153	13	61.3927	0.986982	0.175285	15718
100028_59	100028	2249	17	16.3095	0.984615	0.181343	13199
100028_60	100028	2181	8	6.76046	0.95858	0.185841	1093
100028_8	100028	2302	10	20.0729	0.990533	0.179722	6193
100029_1	100029	3746	9	75.3183	0.974164	0.227543	28409
100029_11	100029	4128	67	268.407	0.97771	0.227438	28721
100029_14	100029	4106	7	21.2687	0.952381	0.237896	23165
100029_16	100029	4564	23	107.045	0.968085	0.228532	22316
100029_2	100029	3775	10	149.06	0.983283	0.221471	28514
100029_43	100029	4319	9	30.5574	0.955927	0.24335	27513
100032_0	100032	6818	22	27.1698	0.99898	0.150481	178860
100032_10	100032	6287	2	8.54163	0.997281	0.149469	167599
100032_4	100032	6118	13	27.3233	0.985724	0.187939	21133
100032_40	100032	5834	12	5.59779	0.950374	0.152905	31714
100032_5	100032	6083	6	9.89696	0.968049	0.147418	167870
100032_8	100032	6193	10	7.27506	0.986404	0.168024	29741
100032_9	100032	6153	11	23.9219	1	0.149782	10744
100033_0	100033	2794	145	88.1164	0.985491	0.181115	32253
100033_16	100033	2786	7	16.6388	0.982143	0.172684	13834
100033_27	100033	2458	7	5.78627	0.956473	0.185714	30084
100033_6	100033	2665	34	42.5594	0.984375	0.178248	2226
100033_7	100033	2735	52	30.9029	0.976562	0.175319	3733
100036_0	100036	2035	4	5.65795	0.965035	0.195791	39053
100036_1	100036	2239	42	92.0929	0.995338	0.170127	45345
100036_12	100036	2169	8	22.2291	0.990676	0.162841	45772
100036_2	100036	2044	10	20.9011	0.987179	0.15174	45820
100036_3	100036	2022	6	6.40723	0.962704	0.175769	2839
100036_5	100036	2127	10	59.4181	0.996503	0.18088	44061
100036_8	100036	2172	11	10.4382	0.979021	0.182001	43669
100036_9	100036	1968	2	3.90331	0.959207	0.202388	5061
100038_0	100038	2411	6	12.0664	0.958996	0.207634	3509
100038_1	100038	2673	21	17.0628	0.964854	0.215659	3634
100038_11	100038	2575	23	17.7182	0.966527	0.205854	3720
100038_13	100038	2508	10	14.7556	0.968201	0.218027	3718
100038_2	100038	2453	6	14.1911	0.971548	0.19905	3674
100038_23	100038	2628	7	9.18618	0.962343	0.206915	3447
100038_47	100038	2634	8	9.93849	0.967364	0.210224	3497
100038_5	100038	2468	20	12.9286	0.954812	0.203231	695
100038_57	100038	2543	20	19.4749	0.970711	0.207172	278
100038_8	100038	2607	6	20.9278	0.974059	0.205587	200
100039_0	100039	2632	15	400.81	0.998058	0.176691	106993
100039_17	100039	2641	8	43.4587	0.998058	0.177361	7062
100039_3	100039	2617	17	150.303	0.999029	0.174953	90924
100039_6	100039	2533	9	20.0039	0.997087	0.183341	5836
100041_0	100041	3147	7	109.854	0.995971	0.180193	3872
100041_1	100041	2978	2	31.8178	0.986301	0.171817	3976
100041_10	100041	2876	11	14.7398	0.967768	0.18618	1962
100041_13	100041	3042	4	9.63201	0.968574	0.189125	3753
100041_15	100041	3214	8	109.093	1	0.180971	3937
100041_23	100041	2993	5	62.3681	0.992748	0.178189	3794
100041_27	100041	3073	17	55.5832	0.991136	0.182222	345
100041_34	100041	2958	3	7.37124	0.953263	0.189257	3862
100041_36	100041	2876	5	13.9565	0.974214	0.181932	485
100041_4	100041	3033	12	183.597	0.998388	0.181432	2126
100041_66	100041	3696	3	9.29449	0.962933	0.214421	3885
100041_73	100041	3444	6	12.9604	0.96938	0.201065	279
100041_9	100041	2969	17	339.116	0.998388	0.178204	3441
100044_0	100044	3662	37	247.69	0.995793	0.188882	3990
100044_1	100044	5078	21	42.1838	0.966346	0.209398	3745
100044_10	100044	4344	12	278.638	0.996394	0.191777	3760
100044_12	100044	4389	11	65.2391	0.982572	0.18886	3761
100044_139	100044	4121	7	69.5095	0.989183	0.194007	3810
100044_18	100044	4929	22	135.429	0.990986	0.201686	3829
100044_19	100044	3978	12	71.781	0.982572	0.22822	3823
100044_2	100044	3866	13	54.3893	0.977163	0.193481	3711
100044_20	100044	4256	11	37.0624	0.969351	0.215136	4005
100044_21	100044	5346	14	93.1467	0.988582	0.218014	3797
100044_24	100044	3962	12	162.468	0.99399	0.196699	3727
100044_27	100044	3854	12	73.4059	0.986178	0.21546	731
100044_3	100044	4200	173	1061.96	0.998197	0.195995	3235
100044_39	100044	4417	9	40.865	0.977163	0.229079	3794
100044_4	100044	4615	17	141.21	0.990986	0.199452	3853
100044_40	100044	4044	10	78.391	0.986178	0.191434	3724
100044_42	100044	4278	12	86.1248	0.987981	0.196167	3706
100044_49	100044	4044	13	161.405	0.993389	0.192151	3770
100044_5	100044	4236	13	129.68	0.992188	0.197398	3665
100044_50	100044	4119	6	80.2722	0.989183	0.191621	284
100044_51	100044	4894	10	55.7	0.980168	0.233401	4000
100044_6	100044	4359	25	114.804	0.990986	0.210371	3660
100044_62	100044	4543	11	61.0988	0.984375	0.217157	3710
100044_69	100044	4977	9	80.6976	0.990986	0.211676	399
100044_7	100044	4213	16	57.5228	0.981971	0.215931	645
100044_70	100044	4529	10	103.371	0.988582	0.205999	3640
100044_80	100044	4028	11	40.1507	0.975361	0.204691	2089
100044_84	100044	3969	3	13.9735	0.96274	0.204832	3757
100045_0	100045	2990	13	14.2898	0.976054	0.199243	12444
100045_10	100045	2655	10	19.9734	0.980843	0.224098	3643
100045_3	100045	3224	31	23.1266	0.977011	0.204496	3801
100045_4	100045	2693	34	39.7436	0.982759	0.17939	1064
100045_5	100045	2609	11	11.065	0.970307	0.195504	1211
100052_0	100052	3009	7	6.04902	0.959656	0.171535	16174
100062_19	100062	2713	2	5.68373	0.986268	0.167143	15333
100062_7	100062	2771	10	16.9312	0.991922	0.178624	14355
100069_10	100069	3257	7	16.9211	0.996647	0.165501	56985
100069_11	100069	2956	7	8.88783	0.98575	0.181756	57165
100069_12	100069	3014	2	5.66383	0.982397	0.179699	56182
100069_17	100069	3375	9	24.6662	0.998324	0.176623	17502
100069_2	100069	2962	7	29.5017	0.998324	0.162135	9536
100069_23	100069	2935	2	3.03936	0.957251	0.202463	56873
100069_30	100069	2982	6	7.44272	0.979883	0.177181	56655
100069_34	100069	3180	11	21.0173	0.996647	0.167828	3239
100069_4	100069	3087	10	20.9602	0.996647	0.168947	31945
100069_42	100069	3064	11	9.62799	0.987427	0.183844	13022
100069_8	100069	3109	16	13.0023	0.987427	0.180788	5307
100070_1	100070	2461	23	16.2573	0.960435	0.174228	21147
100070_14	100070	2794	22	43.1534	0.996044	0.181139	22212
100070_2	100070	2855	10	21.8711	0.983185	0.187062	22613
100070_35	100070	2461	10	10.26	0.950544	0.180343	2444
100070_37	100070	2477	3	7.02113	0.9545	0.191473	21728
100070_4	100070	2859	78	67.0981	0.994065	0.176051	1310
100070_7	100070	2655	83	59.1628	0.996044	0.176022	22515
100072_0	100072	2433	8	18.4404	0.994726	0.16204	43264
100072_1	100072	2381	10	5.40426	0.956751	0.188318	40606
100072_2	100072	2424	9	12.7984	0.992616	0.165365	24854
100074_0	100074	3567	12	289.712	0.996963	0.19239	4516
100074_1	100074	3804	7	53.9229	0.995444	0.193525	4505
100074_10	100074	4473	10	20.2274	0.98861	0.200235	3874
100074_100	100074	3299	4	37.0772	0.996963	0.192309	4533
100074_113	100074	4057	17	42.593	0.993166	0.194107	4498
100074_12	100074	4766	10	45.2238	0.987851	0.209428	4493
100074_13	100074	3538	24	272.536	0.997722	0.193313	4053
100074_14	100074	3700	14	117.055	0.998481	0.19374	3508
100074_16	100074	3416	1	16.2004	0.981777	0.195114	4055
100074_17	100074	3650	20	130.706	0.997722	0.189245	4737
100074_19	100074	3353	12	53.7583	0.998481	0.193504	4868
100074_2	100074	3478	7	97.8883	0.996203	0.189956	4032
100074_20	100074	4292	16	155.648	0.997722	0.195674	3955
100074_21	100074	3381	8	235.004	0.998481	0.190772	4842
100074_27	100074	4070	10	57.6888	0.996963	0.198868	4782
100074_28	100074	3810	36	295.925	0.998481	0.19358	4361
100074_3	100074	3362	13	771.108	0.998481	0.189315	3995
100074_30	100074	3722	23	77.7188	0.996203	0.204926	4026
100074_31	100074	3894	9	43.2566	0.996203	0.19433	4591
100074_32	100074	3533	12	115.838	0.999241	0.190319	4010
100074_33	100074	3472	11	103.738	0.990888	0.192221	4064
100074_34	100074	3716	10	103.13	0.985573	0.193561	3963
100074_35	100074	5362	17	21.2312	0.987851	0.23409	3129
100074_36	100074	3686	12	271.414	0.996203	0.191486	4356
100074_38	100074	4948	10	33.7683	0.993166	0.219604	522
100074_39	100074	4967	13	18.6285	0.974184	0.245255	4770
100074_4	100074	3475	23	138.338	0.996963	0.19099	2783
100074_41	100074	3957	4	14.7116	0.983295	0.198575	4591
100074_46	100074	3881	14	121.846	0.997722	0.194988	4594
100074_5	100074	3552	17	313.917	0.997722	0.192019	3160
100074_55	100074	4231	6	17.7414	0.987851	0.208842	3893
100074_56	100074	3937	7	21.7063	0.992407	0.195708	1075
100074_57	100074	4490	12	22.5569	0.990129	0.199083	4228
100074_58	100074	3962	11	66.6158	0.987092	0.194627	3842
100074_59	100074	3257	1	4.07293	0.957479	0.199136	4014
100074_7	100074	3553	7	108.248	0.999241	0.188566	4428
100074_70	100074	5120	10	35.4026	0.994685	0.203346	4016
100074_72	100074	3993	6	12.7828	0.97874	0.21406	4569
100074_8	100074	4418	7	25.7181	0.992407	0.200488	4348
100074_81	100074	3592	12	163.616	0.996963	0.188678	4472
100074_86	100074	3366	9	23.792	0.990888	0.192574	244
100074_9	100074	3732	17	159.601	0.995444	0.19487	964
100074_98	100074	4402	8	28.3694	0.994685	0.195616	3932
100074_99	100074	5591	7	8.76979	0.969628	0.20853	404
100076_100	100076	3208	8	30.1587	0.990783	0.180287	2959
100076_108	100076	3337	2	15.3827	0.982143	0.183297	2609
100076_11	100076	3123	1	5.22337	0.955645	0.189414	2769
100076_110	100076	3209	6	13.6657	0.976959	0.184096	2737
100076_111	100076	3479	3	8.82194	0.974654	0.186658	2957
100076_112	100076	3413	1	19.4315	0.986751	0.186038	2989
100076_116	100076	3163	1	59.2524	0.990207	0.187429	2975
100076_119	100076	3035	5	10.7782	0.970046	0.172049	3057
100076_12	100076	3042	7	11.4924	0.970046	0.182625	237
100076_120	100076	3329	10	22.79	0.985023	0.181432	2175
100076_124	100076	3338	5	50.8022	0.992512	0.182186	3027
100076_126	100076	3236	1	9.72155	0.982719	0.180088	2951
100076_127	100076	3090	2	19.7186	0.986175	0.177568	2068
100076_129	100076	3058	2	14.92	0.985023	0.175623	2983
100076_13	100076	3132	8	110.443	0.99424	0.176679	3044
100076_133	100076	2927	1	5.15614	0.963134	0.182906	2786
100076_135	100076	3636	20	54.0097	0.991359	0.188378	2582
100076_137	100076	3131	5	27.2717	0.989631	0.175417	2953
100076_138	100076	2921	2	6.13805	0.951613	0.183769	1076
100076_139	100076	3060	8	37.4358	0.986751	0.174998	3213
100076_14	100076	3394	7	94.6772	0.994816	0.174153	3152
100076_144	100076	3021	2	10.6865	0.979839	0.18131	3002
100076_147	100076	3193	1	45.6656	0.996544	0.181991	2432
100076_149	100076	3021	3	6.7554	0.968318	0.184328	2268
100076_15	100076	3132	8	9.58268	0.960253	0.182077	3065
100076_150	100076	3024	1	11.6214	0.980991	0.184633	2902
100076_153	100076	3300	9	87.4535	0.992512	0.176073	3027
100076_16	100076	3328	16	575.699	0.991935	0.175947	2963
100076_165	100076	3057	4	13.0403	0.978111	0.175808	206
100076_170	100076	3120	3	8.23731	0.967742	0.180565	2958
100076_172	100076	3213	8	13.5076	0.971198	0.178316	2999
100076_175	100076	3189	4	34.7563	0.987327	0.176394	2974
100076_176	100076	2973	2	6.4024	0.955069	0.185681	3033
100076_177	100076	3211	5	9.01393	0.971198	0.185804	3030
100076_182	100076	3112	1	8.59002	0.977535	0.184286	3023
100076_189	100076	3327	9	7.15254	0.953341	0.208655	3049
100076_19	100076	3105	2	322.6	0.99424	0.174898	2973
100076_199	100076	3303	2	11.8192	0.974078	0.185531	1461
100076_20	100076	3137	7	25.2739	0.982143	0.178258	2985
100076_21	100076	3310	12	179.163	0.995392	0.177746	3058
100076_24	100076	3491	2	18.7863	0.987327	0.182207	3014
100076_25	100076	3105	3	171.343	0.995392	0.172246	926
100076_26	100076	2863	2	7.40044	0.967166	0.188199	2381
100076_27	100076	3252	8	185.606	0.995968	0.173065	765
100076_3	100076	4317	4	36.0636	0.990783	0.200629	238
100076_32	100076	3057	12	14.6203	0.972926	0.179261	3005
100076_34	100076	3216	2	125.751	0.995392	0.177464	2754
100076_35	100076	3463	4	54.6011	0.99424	0.183739	3058
100076_36	100076	3351	23	233.258	0.995968	0.18376	3022
100076_39	100076	3339	5	44.1395	0.992512	0.179628	2966
100076_4	100076	3113	3	356.038	0.992512	0.174099	2925
100076_40	100076	2945	1	6.9	0.974654	0.178374	2884
100076_42	100076	3260	2	302.764	0.993664	0.175537	2918
100076_46	100076	3334	8	392.399	0.993088	0.180175	1208
100076_48	100076	2956	2	28.2266	0.988479	0.174643	2759
100076_5	100076	4061	16	78.8487	0.992512	0.188669	3025
100076_50	100076	3288	1	50.3964	0.993088	0.178608	2740
100076_54	100076	2950	3	8.34509	0.970046	0.180956	2962
100076_6	100076	3078	7	93.2086	0.99424	0.175757	179
100076_61	100076	3297	12	83.1366	0.993088	0.176787	671
100076_66	100076	3280	1	43.2517	0.993664	0.181852	2993
100076_67	100076	3081	10	14.9161	0.967166	0.179627	264
100076_7	100076	3125	5	259.343	0.993088	0.181138	3020
100076_70	100076	3117	6	49.389	0.991359	0.178545	2971
100076_71	100076	2927	5	8.71418	0.956797	0.178576	3027
100076_72	100076	3361	5	86.9953	0.99424	0.181166	3052
100076_73	100076	3243	13	27.3913	0.987327	0.188923	1553
100076_74	100076	3094	4	32.8588	0.993088	0.174514	2572
100076_75	100076	3325	5	208.761	0.993088	0.182861	2950
100076_78	100076	3262	13	49.3032	0.990207	0.181846	2686
100076_8	100076	3214	10	751.339	0.993664	0.174853	2955
100076_80	100076	3196	2	15.2345	0.983295	0.177704	3025
100076_81	100076	3221	2	58.1444	0.991359	0.177742	2984
100076_85	100076	3361	2	48.0868	0.995392	0.18083	2905
100076_88	100076	2980	4	7.97011	0.964862	0.181702	2963
100076_89	100076	3027	9	44.3854	0.987327	0.174491	2137
100076_92	100076	3222	5	44.8357	0.991359	0.177723	2146
100076_93	100076	3261	3	59.6836	0.994816	0.178573	2998
100076_94	100076	3217	12	79.8151	0.992512	0.203662	1312
100076_96	100076	3021	2	7.38225	0.967742	0.179372	876
100077_2	100077	2491	11	11.12	0.968345	0.178752	21833
100077_5	100077	2462	14	9.74388	0.976978	0.173712	25835
100078_104	100078	2296	2	8.32577	0.967957	0.172423	4882
100078_116	100078	2365	4	20.7003	0.985314	0.165342	4722
100078_12	100078	2335	16	571.161	0.996662	0.170133	4938
100078_14	100078	2331	13	65.1343	0.987984	0.16464	4557
100078_158	100078	2304	2	19.4031	0.989319	0.165921	4778
100078_18	100078	2321	11	32.9659	0.983979	0.170621	4909
100078_2	100078	2376	13	128.563	0.995995	0.169044	4705
100078_21	100078	2200	1	8.24086	0.963284	0.173361	4945
100078_22	100078	2288	5	13.9322	0.96729	0.170364	4162
100078_28	100078	2846	9	94.4749	0.995327	0.186676	4884
100078_3	100078	2768	8	76.1067	0.995327	0.197357	4673
100078_37	100078	2468	14	36.1013	0.979973	0.17747	3800
100078_4	100078	2325	12	31.3767	0.983311	0.170223	4833
100078_42	100078	2365	10	26.0835	0.981976	0.167573	4908
100078_45	100078	2260	7	18.7775	0.96996	0.163181	4875
100078_49	100078	2287	5	23.6673	0.978638	0.171633	728
100078_5	100078	2355	1	7.10307	0.955274	0.174936	4459
100078_53	100078	2638	13	52.0328	0.989319	0.180222	4274
100078_59	100078	2413	23	72.3967	0.993992	0.167571	2161
100078_6	100078	2461	8	56.0007	0.993992	0.168256	4909
100078_63	100078	2545	9	31.1701	0.984646	0.178612	4666
100078_69	100078	2288	4	10.0895	0.953271	0.189034	840
100078_7	100078	2322	19	71.3735	0.99466	0.165092	4850
100078_83	100078	2329	5	19.6726	0.979306	0.172103	925
100078_9	100078	2467	8	81.1898	0.993992	0.176446	2086
100078_92	100078	2412	2	26.2171	0.987984	0.171747	4750
100078_95	100078	2229	8	17.766	0.969292	0.178764	386
100080_2	100080	3068	16	24.0929	0.999042	0.135219	7829
100080_5	100080	3129	7	5.74676	0.996648	0.165243	2415
100080_6	100080	2915	7	4.27627	0.984674	0.147985	1695
100084_1	100084	3833	13	37.312	0.987179	0.195577	10847
100084_10	100084	3675	7	44.3853	0.99359	0.189722	4644
100084_13	100084	3467	9	12.7138	0.971154	0.200072	9721
100084_6	100084	3790	11	32.9874	0.980769	0.192894	1012
100086_0	100086	2320	33	45.2565	0.99018	0.149306	25772
100086_33	100086	2150	4	6.60074	0.966448	0.159667	3109
100086_7	100086	2189	13	19.1818	0.981178	0.150144	4496
100087_1	100087	2769	19	34.9839	0.995955	0.167262	75605
100087_11	100087	3112	41	23.5819	0.981392	0.167888	14933
100087_12	100087	2911	18	14.7078	0.971683	0.162029	71914
100087_15	100087	2997	35	17.1192	0.967638	0.166222	84500
100087_2	100087	3002	40	39.6773	0.992718	0.156157	5363
100087_21	100087	2655	11	14.8859	0.994337	0.15153	83928
100087_29	100087	2839	8	9.16496	0.970874	0.162878	16816
100087_32	100087	2797	24	16.2146	0.969256	0.164355	74624
100087_5	100087	2936	23	23.5663	0.987055	0.162034	18700
100087_7	100087	2875	26	14.7576	0.975728	0.162356	8589
100087_9	100087	2859	23	37.1029	0.995146	0.157062	5027
100089_0	100089	3102	4	47.2358	0.997924	0.170693	98670
100089_3	100089	3485	19	428.735	1	0.16201	41792
100099_0	100099	5035	12	175.452	0.995977	0.194768	19207
100099_1	100099	6035	16	46.3772	0.996782	0.205539	19087
100099_10	100099	4795	26	38.871	0.996782	0.187737	18684
100099_11	100099	5526	11	17.7839	0.994368	0.196311	1237
100099_115	100099	4182	3	20.9568	0.993564	0.182975	18408
100099_118	100099	4199	1	5.34775	0.985519	0.226255	2377
100099_13	100099	5781	6	8.50188	0.991955	0.220827	19009
100099_14	100099	4807	8	47.7473	0.998391	0.210568	17616
100099_140	100099	4258	1	4.48339	0.981496	0.196002	3198
100099_15	100099	5297	13	32.2053	0.995977	0.196155	18588
100099_151	100099	4600	5	12.6723	0.990346	0.190154	19323
100099_18	100099	4999	12	27.3075	0.993564	0.192792	10413
100099_2	100099	4253	8	35.4307	0.993564	0.182393	18176
100099_21	100099	4353	2	10.4189	0.993564	0.185881	18498
100099_22	100099	4517	1	6.18247	0.99115	0.232579	19164
100099_27	100099	5443	9	29.2125	0.995977	0.198048	2082
100099_28	100099	5643	9	15.9954	0.991955	0.205473	17713
100099_31	100099	5087	5	13.4763	0.991955	0.201639	17658
100099_33	100099	5961	19	37.0882	0.996782	0.218361	3248
100099_34	100099	4716	13	55.6996	0.997586	0.216322	5614
100099_39	100099	5050	3	19.9784	0.988737	0.191752	1953
100099_4	100099	4715	38	234.992	0.996782	0.210038	3771
100099_40	100099	4319	3	6.77711	0.990346	0.193763	2053
100099_48	100099	4885	6	5.12456	0.976669	0.21046	8124
100099_5	100099	5625	5	25.2227	0.993564	0.209231	17945
100099_58	100099	4523	22	13.6105	0.989541	0.191698	1937
100099_62	100099	4376	9	8.15836	0.987932	0.195739	2004
100099_65	100099	5673	2	9.09299	0.988737	0.196174	6030
100099_7	100099	4260	5	83.3248	0.995977	0.178368	18743
100099_77	100099	5823	8	25.1311	0.995977	0.212344	3209
100099_78	100099	4586	5	15.7534	0.991955	0.194262	1790
100099_80	100099	5295	7	13.7145	0.995173	0.193626	1951
100099_87	100099	4797	2	3.48493	0.970233	0.212399	5435
100099_88	100099	5140	2	6.18128	0.989541	0.205705	2882
100099_92	100099	4524	2	6.89037	0.984714	0.206497	1866
100099_93	100099	4759	11	31.7066	0.997586	0.193503	2037
100105_2	100105	3307	14	108.185	0.975045	0.182635	51698
100106_2	100106	2945	1	5.93004	0.997388	0.144029	39874
100107_0	100107	5517	4	9.36179	0.969046	0.181885	64424
100107_1	100107	5637	2	72.7937	0.995257	0.15691	68395
100108_5	100108	4366	6	44.3668	0.994792	0.123385	29136
100108_8	100108	4363	1	6.79657	0.977307	0.145185	28450
100113_12	100113	2118	1	3.80589	0.963446	0.174185	2418
100117_2	100117	2571	4	14.3752	0.995364	0.106659	19336
100128_0	100128	2241	24	236.772	0.995305	0.147583	35260
100128_2	100128	2118	22	296.911	0.99687	0.134913	34784
100133_12	100133	2815	2	4.97858	0.977071	0.160446	16065
100133_13	100133	3048	30	28.6242	0.995562	0.171437	5128
100133_2	100133	3088	5	37.1552	0.997781	0.154139	14944
100136_0	100136	2550	18	46.2492	0.98069	0.142958	15946
100136_14	100136	2317	15	7.90836	0.963136	0.154557	5780
100136_4	100136	2367	7	14.7039	0.970158	0.153451	7889
100136_7	100136	2583	10	45.8265	0.983031	0.148926	1208
100138_0	100138	3265	13	10.8838	0.952298	0.186625	44219
100138_3	100138	3372	6	26.4789	0.974404	0.183128	43854
100138_6	100138	3394	15	26.2971	0.968586	0.185638	7877
100139_12	100139	1922	10	5.29191	0.965919	0.155131	58489
100139_3	100139	2091	8	9.51314	0.99335	0.158754	17178
100139_4	100139	2206	17	21.6646	0.989194	0.147101	31977
100139_6	100139	2074	13	17.1642	0.996675	0.14967	9374
100139_9	100139	2039	20	13.0914	0.980881	0.157986	3450
100140_15	100140	2489	13	9.81327	0.957774	0.192709	20297
100140_2	100140	2450	13	9.98444	0.956814	0.199756	19215
100140_3	100140	2496	19	11.1354	0.958733	0.197581	15088
100140_8	100140	2501	8	10.087	0.976967	0.193604	1355
100141_13	100141	2427	13	6.46954	0.982342	0.152955	11337
100141_2	100141	2503	10	8.6785	0.989777	0.151792	5621
100141_33	100141	2530	16	9.73758	0.972119	0.136401	65078
100142_22	100142	3118	17	21.1861	0.96745	0.193317	6648
100142_24	100142	2830	2	6.17566	0.954792	0.202013	9642
100142_4	100142	3490	10	29.294	0.996383	0.191977	10053
100142_45	100142	3943	4	10.0741	0.980108	0.203041	2028
100142_5	100142	3038	18	13.3153	0.958409	0.193695	3114
100144_0	100144	2946	21	103.15	0.985826	0.182172	33641
100144_1	100144	3000	25	253.415	0.995039	0.174038	33606
100144_10	100144	3042	10	179.23	0.996456	0.175537	33816
100144_103	100144	2941	20	51.6044	0.962438	0.178511	34010
100144_12	100144	2820	13	77.9107	0.982991	0.169292	34372
100144_124	100144	2920	13	42.5982	0.955351	0.193642	33909
100144_14	100144	3102	11	214.425	0.997165	0.177605	34308
100144_16	100144	3522	12	134.723	0.993622	0.184055	34147
100144_20	100144	3354	14	93.3262	0.989369	0.178565	31939
100144_21	100144	2920	10	61.4098	0.980865	0.172705	32942
100144_24	100144	3029	24	190.711	0.993622	0.180937	33833
100144_27	100144	2971	16	109.539	0.991495	0.17772	33567
100144_28	100144	2944	20	121.509	0.992913	0.172279	33671
100144_3	100144	3478	13	166.569	0.995039	0.185867	34090
100144_30	100144	2948	8	62.64	0.976612	0.174658	34029
100144_4	100144	2938	10	192.013	0.996456	0.169296	34117
100144_43	100144	2965	5	50.1253	0.9837	0.175845	34051
100144_47	100144	3173	13	186.252	0.996456	0.172605	33784
100144_53	100144	2979	7	43.875	0.975195	0.173622	32446
100144_57	100144	3176	11	97.2965	0.990078	0.176971	32942
100144_59	100144	2904	14	52.3469	0.965273	0.17558	34515
100144_6	100144	2994	22	454.575	0.998583	0.170701	2457
100144_76	100144	3130	12	96.8335	0.992913	0.179931	33119
100144_99	100144	2956	9	65.909	0.986534	0.185211	7032
100146_0	100146	2281	18	8.63868	0.966023	0.169484	32941
100146_1	100146	2258	27	12.1595	0.978378	0.153191	32433
100146_11	100146	2278	8	7.29828	0.967568	0.164572	32687
100146_2	100146	2496	13	15.9059	0.992278	0.167437	8160
100146_45	100146	2197	5	5.40013	0.976062	0.176837	23831
100146_5	100146	2125	22	8.74698	0.952896	0.159517	8026
100146_8	100146	2423	45	25.5296	0.990734	0.164947	6164
100148_0	100148	2655	13	36.2429	0.998277	0.161818	31392
100148_1	100148	2655	4	15.3082	0.993109	0.174854	34883
100148_10	100148	2832	5	6.9109	0.977606	0.221083	31454
100148_2	100148	2558	12	14.3004	0.985357	0.199383	32403
100148_3	100148	2375	46	44.1376	0.992248	0.166764	2919
100148_4	100148	2542	2	15.9076	0.988803	0.165972	7635
100148_6	100148	2703	5	19.5216	0.980189	0.173745	22787
100148_9	100148	2483	7	8.43735	0.979328	0.180746	9303
100150_2	100150	6068	42	119.047	0.998979	0.15195	67412
100150_3	100150	5724	7	132.406	0.998639	0.13939	11023
100150_5	100150	5947	10	10.7315	0.982982	0.160562	7454
100151_5	100151	3194	7	5.85702	0.987783	0.159002	13181
100151_8	100151	3113	4	3.59477	0.971041	0.186162	16663
100153_0	100153	2641	12	17.1809	0.990758	0.131716	74799
100153_2	100153	2456	10	3.64831	0.952557	0.164116	15694
100154_1	100154	2472	9	80.444	0.993438	0.141896	40926
100154_14	100154	2343	5	9.50976	0.9521	0.155186	40971
100154_15	100154	2457	5	62.6078	0.994751	0.143128	38154
100154_16	100154	2640	15	24.6691	0.956693	0.167687	38417
100154_2	100154	2812	15	54.2959	0.98294	0.150626	19890
100154_22	100154	2377	4	9.93449	0.950787	0.148659	40618
100154_24	100154	2530	15	17.0664	0.951444	0.168428	36419
100154_25	100154	2686	10	38.0001	0.983596	0.167318	2272
100154_27	100154	2505	6	65.6582	0.998031	0.139835	40332
100154_37	100154	2357	14	20.0062	0.973097	0.144589	39645
100154_7	100154	2455	4	33.0472	0.990157	0.141104	2945
100154_8	100154	2600	2	58.8931	0.996719	0.145581	39599
100154_9	100154	2721	19	59.223	0.988189	0.151423	4490
100159_0	100159	3133	13	42.1935	0.996619	0.150706	39754
100159_12	100159	2811	20	7.01623	0.956051	0.245045	33378
100159_2	100159	2778	6	4.65709	0.96146	0.170149	18428
100159_29	100159	2984	4	7.29788	0.993915	0.166098	31492
100159_5	100159	2952	6	4.81346	0.960108	0.209174	2911
100169_10	100169	1969	8	3.4212	0.969611	0.15686	31707
100169_2	100169	2134	11	15.846	0.99905	0.136652	28183
100169_22	100169	1871	4	2.21728	0.959164	0.161896	24252
100169_3	100169	1907	11	33.4403	0.968661	0.132958	1923
100169_4	100169	2062	5	7.7695	0.995252	0.137062	24339
100169_55	100169	2048	16	9.96554	0.995252	0.137784	1702
100169_6	100169	2047	10	8.70373	0.993352	0.137348	24698
100170_1	100170	3235	34	44.1225	0.993043	0.177891	48216
100170_2	100170	3054	13	21.7903	0.993913	0.179345	48539
100170_3	100170	2970	21	13.7109	0.983478	0.185571	10725
100177_0	100177	2431	13	21.535	0.989282	0.186266	50273
100177_2	100177	2491	18	16.7893	0.957128	0.187694	48176
100177_4	100177	2637	28	56.5248	0.994641	0.177632	2744
100177_9	100177	2280	3	7.3058	0.97642	0.179643	5601
100179_0	100179	5167	13	48.3014	0.992379	0.150646	73718
100179_12	100179	5296	23	16.3446	0.986083	0.149488	71236
100179_15	100179	5317	2	6.84265	0.987078	0.162023	68218
100179_28	100179	5676	4	52.417	0.999006	0.201532	10866
100179_3	100179	5555	32	27.0592	0.988072	0.159818	38081
100179_46	100179	5008	3	8.53193	0.974155	0.158519	11954
100179_7	100179	5142	9	15.9912	0.986415	0.15574	10208
100183_0	100183	3829	12	30.8193	0.992116	0.148591	87856
100183_1	100183	4140	60	75.231	0.996361	0.136309	71379
100183_4	100183	4146	11	6.16967	0.963614	0.176051	70309
100183_7	100183	3720	19	15.3827	0.978775	0.160305	5008
100183_8	100183	3907	3	8.06255	0.986052	0.17616	74054
100183_9	100183	3933	10	25.5419	0.989691	0.155472	24102
100185_21	100185	3205	19	18.3516	0.997699	0.217401	55712
100185_23	100185	2688	4	5.20816	0.974684	0.21003	69634
100185_5	100185	3273	16	23.2784	0.995397	0.194234	15597
100185_7	100185	3099	20	26.4289	0.997699	0.193308	7093
100190_1	100190	2713	20	219.482	0.999303	0.166433	17677
100190_10	100190	2486	4	17.5959	0.972106	0.162564	17473
100190_12	100190	2720	12	106.459	0.994421	0.165332	17716
100190_13	100190	2893	21	43.7618	0.986053	0.166561	8831
100190_14	100190	2594	7	28.2096	0.984658	0.164213	17906
100190_16	100190	2670	7	77.2807	0.995816	0.158878	17736
100190_17	100190	2608	3	9.35807	0.964435	0.176274	17051
100190_2	100190	2718	8	50.7795	0.995119	0.162421	16176
100190_31	100190	2530	7	22.107	0.972803	0.159859	1436
100190_39	100190	2567	3	10.5965	0.95258	0.173252	17645
100190_5	100190	2608	10	17.7776	0.96583	0.188745	1930
100190_50	100190	2543	1	13.8995	0.977685	0.168009	1798
100190_59	100190	2718	5	20.4321	0.981869	0.16326	17482
100193_27	100193	3083	9	4.74576	0.951562	0.175981	8633
100194_18	100194	2664	50	14.5154	0.973321	0.169213	25276
100194_2	100194	2656	33	17.5203	0.976081	0.181213	5183
100194_7	100194	2542	13	10.5456	0.978841	0.161177	6728
100195_0	100195	2634	12	19.768	0.991121	0.190318	77214
100195_1	100195	2737	9	45.4018	0.99667	0.184321	77034
100195_10	100195	2669	6	14.5455	0.988901	0.187943	73782
100195_7	100195	2323	3	5.39213	0.965594	0.184822	77874
100195_8	100195	2616	7	61.9146	0.994451	0.171637	76853
100196_0	100196	7390	46	103.968	0.963865	0.229009	12734
100196_1	100196	6194	6	55.4788	0.970149	0.225154	13488
100196_100	100196	8773	23	135.996	0.981147	0.232206	12286
100196_12	100196	9172	17	79.8609	0.970149	0.224058	13200
100196_120	100196	7786	2	12.0054	0.952474	0.240565	7455
100196_123	100196	6494	14	67.0894	0.959937	0.232976	13217
100196_128	100196	5583	21	51.9942	0.976041	0.214881	12264
100196_13	100196	5706	35	150.975	0.976826	0.211597	13482
100196_14	100196	6630	16	139.555	0.980361	0.227022	12455
100196_159	100196	7467	10	15.7613	0.951296	0.230145	12465
100196_18	100196	7487	26	127.031	0.974863	0.221084	13003
100196_2	100196	8219	20	60.697	0.965436	0.212596	10945
100196_22	100196	5177	22	174.418	0.989395	0.220257	13090
100196_23	100196	7115	7	38.7795	0.96033	0.239196	4547
100196_25	100196	5578	7	110.995	0.973291	0.222475	1814
100196_28	100196	5653	17	399.337	0.988217	0.223267	13285
100196_29	100196	7086	19	130.528	0.975648	0.220557	13091
100196_3	100196	6496	5	23.2994	0.950118	0.235392	1212
100196_4	100196	9711	13	47.2015	0.961115	0.217222	13213
100196_40	100196	6401	15	72.5631	0.970542	0.225697	12556
100196_43	100196	6027	9	43.4854	0.967007	0.210543	10983
100196_5	100196	5661	23	411.481	0.986253	0.208742	12818
100196_51	100196	6095	3	24.3294	0.954831	0.230795	13277
100196_56	100196	6446	21	61.7773	0.959937	0.217065	2792
100196_89	100196	8143	42	114.155	0.976434	0.217064	1012
100199_0	100199	2017	3	8.06848	0.989216	0.162579	71901
100199_10	100199	1994	6	13.9118	1	0.156047	19537
100199_21	100199	1961	2	7.01845	0.992157	0.151312	76050
100203_0	100203	3760	10	19.6529	0.982736	0.148384	64978
100203_1	100203	3514	20	13.5827	0.966135	0.15217	66532
100203_2	100203	3581	15	7.72377	0.953519	0.157987	60689
100204_0	100204	2151	47	69.1343	0.998206	0.146252	45148
100204_16	100204	2107	10	28.771	0.997309	0.144887	45815
100204_45	100204	2005	9	21.3112	0.989238	0.145727	4547
100204_5	100204	2079	8	15.7879	0.98296	0.147803	7330
100204_6	100204	2012	16	9.71625	0.961435	0.171623	16057
100204_9	100204	2151	17	19.2017	0.984753	0.154131	44258
100205_0	100205	3044	11	172.423	0.993069	0.178443	14013
100205_10	100205	2824	4	4.64263	0.951485	0.195618	13617
100205_13	100205	2921	6	37.915	0.99505	0.173928	12576
100205_17	100205	2633	11	12.341	0.960396	0.173739	8490
100205_18	100205	3063	11	49.9192	0.994059	0.17868	13669
100205_2	100205	2992	13	33.4187	0.993069	0.177388	1280
100205_21	100205	3099	13	30.0761	0.992079	0.1767	13408
100205_27	100205	3079	8	12.2566	0.975248	0.189627	3486
100205_28	100205	3443	11	8.37188	0.965347	0.199955	5908
100205_29	100205	3022	9	7.94275	0.958416	0.193712	10600
100205_37	100205	2899	7	8.333	0.972277	0.181444	12856
100205_39	100205	2909	7	9.14361	0.966337	0.18039	9768
100205_6	100205	3281	8	14.7638	0.986139	0.181071	4348
100205_60	100205	2978	9	6.4832	0.952475	0.199525	4419
100205_7	100205	3160	23	26.5682	0.990099	0.179151	1027
100205_8	100205	3190	16	34.3316	0.993069	0.178866	1031
100205_91	100205	2807	1	3.66796	0.956436	0.192872	2139
100208_12	100208	2114	10	10.8485	0.951904	0.170567	25714
100208_17	100208	2415	7	19.6524	0.978958	0.173585	25990
100208_18	100208	2185	6	12.69	0.971944	0.168102	18031
100208_2	100208	2336	9	59.8329	0.997996	0.162331	25745
100208_22	100208	2304	12	26.2422	0.97495	0.202104	25417
100208_27	100208	2196	7	17.5636	0.977956	0.23875	25713
100208_3	100208	2249	11	17.9692	0.981964	0.178071	25880
100208_32	100208	2307	12	35.9046	0.990982	0.175237	5400
100208_49	100208	2181	13	30.9123	0.988978	0.183938	7738
100208_5	100208	2305	12	29.2652	0.990982	0.171486	25637
100208_51	100208	2292	17	31.932	0.985972	0.172493	2998
100208_6	100208	2425	15	77.6469	0.995992	0.168824	23903
100208_8	100208	2316	15	38.7393	0.993988	0.169309	22824
100209_0	100209	2657	8	23.341	0.985119	0.162514	43714
100209_1	100209	3608	23	34.35	0.983631	0.191941	43183
100209_10	100209	3022	10	46.6175	0.99256	0.170924	43970
100209_11	100209	2881	13	23.6745	0.978423	0.177516	44291
100209_12	100209	2829	8	76.7475	0.998512	0.162575	44198
100209_13	100209	2667	10	37.8237	0.99256	0.157931	44007
100209_14	100209	2776	30	28.9943	0.970982	0.176361	44366
100209_17	100209	3040	17	43.9942	0.989583	0.187682	45310
100209_2	100209	2671	37	122.912	0.997024	0.154612	45132
100209_25	100209	2693	15	12.0143	0.960565	0.176429	4678
100209_27	100209	2677	11	22.6941	0.983631	0.185902	41979
100209_29	100209	2689	9	11.4961	0.955357	0.189729	44712
100209_3	100209	2968	11	27.5718	0.985863	0.194835	45312
100209_31	100209	2659	13	14.4495	0.956101	0.213179	44945
100209_32	100209	2940	15	14.156	0.960565	0.23208	44078
100209_42	100209	2616	3	6.88828	0.950149	0.1763	37746
100209_49	100209	2937	9	10.0044	0.956101	0.197941	37559
100209_6	100209	2940	21	54.7656	0.991071	0.227402	12933
100209_63	100209	3254	12	29.7522	0.988839	0.206196	44537
100209_68	100209	2704	5	13.6343	0.973214	0.165113	43809
100209_7	100209	2757	13	20.3739	0.979167	0.169918	42820
100209_77	100209	2550	1	4.60368	0.950893	0.18674	44937
100209_8	100209	2507	6	15.6343	0.977679	0.172377	12223
100209_80	100209	2887	10	13.2291	0.957589	0.181735	33489
100209_9	100209	2839	15	68.6862	0.993304	0.163292	42810
100212_0	100212	2673	24	19.7304	0.971072	0.202556	24635
100212_12	100212	2796	15	12.6951	0.96384	0.202654	23712
100212_2	100212	2862	22	29.2605	0.976331	0.199969	25156
100212_25	100212	2853	18	20.7843	0.971729	0.199125	23776
100212_3	100212	2642	4	7.88782	0.953978	0.198095	2460
100212_38	100212	2893	2	6.65761	0.954635	0.202313	3780
100212_4	100212	2649	21	37.4621	0.976331	0.199455	14839
100212_5	100212	2767	12	19.5467	0.977646	0.200198	8764
100212_8	100212	2554	6	7.87797	0.963182	0.195009	7044
100214_1	100214	1987	7	27.4241	0.997593	0.154988	49948
100214_11	100214	1894	4	5.43722	0.980746	0.164616	47435
100214_15	100214	2013	10	29.5163	0.997593	0.15631	8236
100214_18	100214	2012	3	16.8056	0.993983	0.157098	47496
100214_2	100214	1922	14	28.5616	0.99639	0.152715	29024
100214_21	100214	1900	3	4.37259	0.967509	0.199023	30311
100214_22	100214	2006	13	23.3825	0.995187	0.159279	4483
100214_32	100214	1956	9	6.43412	0.977136	0.173475	25117
100214_4	100214	1974	4	42.2827	0.997593	0.160545	8869
100214_6	100214	1818	2	458.203	0.980746	0.143523	6611
100215_0	100215	2346	12	364.144	0.983638	0.154224	85161
100215_4	100215	2406	24	395.467	0.999038	0.148033	86417
100217_0	100217	3542	8	82.6531	0.996434	0.193035	6087
100217_101	100217	3279	7	13.8656	0.972896	0.208506	6291
100217_119	100217	3093	3	8.76571	0.964337	0.186328	5920
100217_128	100217	3565	3	18.4351	0.990728	0.209121	6352
100217_132	100217	3356	6	12.3214	0.980742	0.193337	731
100217_14	100217	3195	4	38.3219	0.994294	0.182444	1746
100217_15	100217	3304	12	83.0846	0.997147	0.18707	5924
100217_16	100217	3196	6	44.4541	0.992154	0.186352	1900
100217_17	100217	3702	20	168.859	0.99786	0.191335	6264
100217_24	100217	3444	13	50.5552	0.995007	0.194002	820
100217_25	100217	3359	13	45.5041	0.992867	0.194198	5292
100217_26	100217	3249	8	39.1082	0.991441	0.182086	708
100217_28	100217	3384	3	6.20632	0.957204	0.225524	5979
100217_29	100217	3325	8	37.5142	0.988588	0.184231	3277
100217_3	100217	3383	3	28.9798	0.995007	0.186727	876
100217_38	100217	3235	3	42.1975	0.995007	0.183469	6185
100217_41	100217	3680	2	13.2576	0.982882	0.21093	6200
100217_43	100217	3458	2	13.2646	0.985735	0.196131	6347
100217_45	100217	3222	3	10.08	0.968616	0.191782	6202
100217_46	100217	3192	13	85.0465	0.995007	0.187939	723
100217_47	100217	3169	2	39.9015	0.993581	0.183503	6011
100217_51	100217	3149	15	16.957	0.970043	0.195757	6161
100217_52	100217	3347	3	35.982	0.99572	0.187505	4724
100217_53	100217	3284	4	7.87613	0.962197	0.194912	1426
100217_56	100217	3184	2	12.8986	0.983595	0.189922	6081
100217_6	100217	3264	15	15.1645	0.960057	0.214973	2466
100217_60	100217	3266	2	10.6249	0.977175	0.18812	6369
100217_61	100217	3283	7	12.1306	0.972183	0.207626	5095
100217_62	100217	3402	8	19.9263	0.989301	0.187714	690
100217_66	100217	3129	4	9.7969	0.983595	0.195063	5644
100217_69	100217	3283	2	13.987	0.980742	0.189596	1321
100217_78	100217	3258	4	25.0484	0.985735	0.184852	4852
100217_8	100217	3684	13	124.335	0.999287	0.193647	757
100217_80	100217	3209	1	8.59277	0.981455	0.195236	923
100217_89	100217	3180	2	12.863	0.987874	0.187127	834
100217_9	100217	3393	10	58.7219	0.992154	0.196381	2462
100217_91	100217	3072	1	7.34821	0.972896	0.191264	887
100217_92	100217	3131	8	11.6503	0.958631	0.217988	3217
100231_0	100231	2738	5	26.2342	0.980191	0.178657	18514
100231_1	100231	2644	13	42.8974	0.983607	0.175159	18593
100231_15	100231	2705	6	15.0362	0.960383	0.180805	18892
100231_24	100231	2887	12	78.9471	0.996585	0.172258	1222
100231_3	100231	2732	13	42.8886	0.984973	0.17933	6491
100231_33	100231	2756	20	76.2962	0.997951	0.173915	18735
100231_4	100231	2849	21	34.8792	0.972678	0.184071	18724
100231_47	100231	2629	6	24.4423	0.981557	0.174196	10682
100231_6	100231	2740	8	179.248	0.998634	0.172458	9248
100233_0	100233	2971	10	17.2868	0.990128	0.183477	39231
100233_1	100233	3081	11	28.3426	0.972359	0.180738	38611
100233_10	100233	2966	7	12.558	0.979269	0.186553	23389
100233_11	100233	2982	7	11.5377	0.973346	0.189203	39076
100233_12	100233	2925	2	6.81072	0.985192	0.183974	38348
100233_13	100233	3035	10	13.7552	0.989141	0.183726	38752
100233_14	100233	3048	8	13.8172	0.991115	0.182785	6844
100233_17	100233	2949	9	24.2604	0.990128	0.183284	39060
100233_18	100233	2941	9	8.92624	0.978282	0.18175	38790
100233_21	100233	3065	13	7.43201	0.966436	0.200067	39199
100233_22	100233	2856	6	5.01844	0.959526	0.192479	38750
100233_26	100233	2889	8	6.20496	0.957552	0.189858	37530
100233_27	100233	2970	6	7.98048	0.973346	0.18915	23168
100233_3	100233	2884	10	37.6256	0.984205	0.175331	11791
100233_30	100233	2999	16	7.87363	0.973346	0.189023	36888
100233_33	100233	2823	7	5.99906	0.953603	0.193188	38676
100233_4	100233	2925	21	26.7135	0.994077	0.184572	5889
100233_46	100233	2907	9	5.80449	0.962488	0.190581	2909
100233_47	100233	3068	4	10.1304	0.987167	0.195976	38297
100233_5	100233	3096	11	22.4016	0.992103	0.180996	6928
100233_7	100233	2876	10	19.073	0.974334	0.179092	35164
100233_8	100233	3135	9	8.94371	0.987167	0.185771	10874
100236_0	100236	3781	11	1086.61	0.990733	0.161969	79562
100236_12	100236	3833	18	94.6218	0.966902	0.163763	78612
100236_16	100236	3750	5	29.0672	0.965137	0.156311	74779
100236_27	100236	3603	1	32.1671	0.966019	0.164997	77046
100236_30	100236	3547	6	42.4045	0.95278	0.158203	75642
100236_6	100236	3737	19	195.524	0.983672	0.160457	75075
100240_0	100240	2250	12	39.6389	0.999289	0.120774	28905
100242_0	100242	3199	13	64.637	0.9914	0.169215	8297
100242_1	100242	2991	18	37.4193	0.979115	0.163971	9545
100242_11	100242	2855	22	17.0465	0.95086	0.17901	4467
100242_17	100242	2918	18	18.3262	0.962531	0.171571	9480
100242_21	100242	2901	4	8.94042	0.968059	0.173335	4637
100242_25	100242	2888	10	20.9261	0.973587	0.164209	9458
100242_28	100242	2977	5	6.78336	0.958845	0.180286	9003
100242_29	100242	3022	6	13.8798	0.966216	0.173928	1682
100242_32	100242	2906	13	14.8579	0.964373	0.166808	5583
100242_37	100242	2927	7	13.2721	0.96683	0.167105	4718
100242_4	100242	2974	11	48.8018	0.987715	0.160808	1014
100242_6	100242	3051	10	123.664	0.9957	0.159541	1094
100242_67	100242	2856	3	7.64428	0.95086	0.175545	6205
100242_7	100242	3204	12	51.0633	0.990172	0.166082	5427
100242_9	100242	2837	17	16.517	0.960074	0.174083	895
100243_0	100243	4111	22	227.899	0.987115	0.236714	3820
100243_1	100243	3572	12	499.93	0.984314	0.229713	3942
100243_10	100243	5985	24	88.7596	0.987675	0.21926	3969
100243_12	100243	4234	12	310.24	0.994958	0.22885	3833
100243_122	100243	4252	6	92.3475	0.992157	0.22738	3783
100243_16	100243	4094	18	299.694	0.992157	0.232409	3790
100243_30	100243	6845	25	165.812	0.989356	0.219314	3878
100243_5	100243	5145	15	353.521	0.990476	0.230078	3888
100243_57	100243	5680	12	207.731	0.991597	0.220435	3895
100243_58	100243	3994	11	140.089	0.994958	0.232399	3788
100243_6	100243	5310	50	697.602	0.994398	0.223175	3725
100243_61	100243	4420	13	74.5412	0.988796	0.237277	3791
100243_7	100243	6554	30	128.451	0.988796	0.220037	3704
100243_70	100243	6259	23	128.477	0.990476	0.222564	3736
100243_82	100243	6834	21	28.9011	0.973109	0.238112	3762
100244_1	100244	2110	15	55.2433	0.99631	0.162942	16385
100244_22	100244	1998	7	8.1133	0.95203	0.199019	17681
100244_5	100244	2135	11	16.4124	0.9877	0.178492	17593
100244_7	100244	2154	12	35.5338	0.9877	0.181339	10644
100247_0	100247	1895	19	10.4288	0.993766	0.176239	134154
100247_2	100247	1928	12	37.5814	1	0.163485	11739
100249_1	100249	2406	20	19.8761	0.966732	0.178314	10722
100249_13	100249	2341	15	25.3611	0.97456	0.171832	9149
100249_24	100249	2379	6	9.7571	0.954012	0.179746	10514
100249_3	100249	2550	7	17.1987	0.982387	0.180948	3638
100249_4	100249	2250	18	19.2758	0.962818	0.174337	10422
100249_44	100249	2460	8	10.1433	0.958904	0.189452	2362
100249_5	100249	2376	23	59.6258	0.990215	0.171387	2414
100250_0	100250	2883	43	44.9882	0.997685	0.161535	44905
100250_1	100250	2670	10	9.0623	0.976852	0.179126	45630
100250_10	100250	2959	21	43.1534	0.996914	0.164108	46511
100250_14	100250	2737	12	11.562	0.981481	0.166466	46749
100250_16	100250	2714	2	4.66646	0.971451	0.17338	47098
100250_19	100250	2732	3	6.05405	0.981481	0.169299	3440
100250_2	100250	2804	9	27.0685	0.996914	0.156375	46283
100250_24	100250	2625	4	4.57192	0.95679	0.173969	42129
100250_26	100250	2768	3	8.33608	0.990741	0.166751	32918
100250_3	100250	2929	8	24.525	0.996142	0.15977	4374
100250_31	100250	2788	8	11.6987	0.988426	0.164709	30516
100250_4	100250	2909	22	81.9164	0.997685	0.155564	41884
100250_9	100250	2809	3	10.8791	0.991512	0.159403	16463
100251_1	100251	4494	14	22.0854	0.962754	0.231937	2181
100251_11	100251	3781	4	8.71989	0.958239	0.21029	1756
100251_13	100251	4600	8	31.882	0.990971	0.19646	2255
100251_14	100251	4213	7	28.0982	0.987585	0.223586	2357
100251_15	100251	3615	7	11.0976	0.953725	0.202786	572
100251_176	100251	3406	2	8.23676	0.967269	0.204979	2239
100251_19	100251	3952	19	23.4176	0.970655	0.206674	2206
100251_2	100251	4097	12	17.9861	0.960497	0.229533	309
100251_23	100251	3564	12	17.4606	0.954853	0.207862	1458
100251_24	100251	4179	6	11.4339	0.957111	0.2162	2255
100251_242	100251	4188	10	13.9706	0.968397	0.197258	2161
100251_25	100251	3675	2	25.1363	0.994357	0.186399	437
100251_28	100251	3478	5	27.8607	0.987585	0.188883	297
100251_29	100251	3237	17	36.1378	0.98307	0.190029	2233
100251_32	100251	3957	4	9.01491	0.952596	0.20174	2151
100251_33	100251	4966	3	6.46878	0.959368	0.22405	2194
100251_34	100251	5042	4	32.9595	0.987585	0.220746	2244
100251_36	100251	4060	17	32.8412	0.976298	0.208811	2142
100251_4	100251	3721	14	261.02	0.995485	0.18568	2240
100251_43	100251	3569	15	21.1698	0.972912	0.201571	2238
100251_45	100251	3701	4	17.6261	0.978555	0.207306	2234
100251_5	100251	3905	7	25.2405	0.984199	0.197279	1211
100251_50	100251	4461	14	36.599	0.985327	0.229415	629
100251_63	100251	3970	11	28.0112	0.976298	0.230121	306
100251_8	100251	3555	2	73.7642	0.990971	0.187351	387
100251_9	100251	3431	16	97.8758	0.990971	0.185834	369
100253_0	100253	2174	18	9.08083	0.954913	0.213745	19613
100253_1	100253	2308	19	14.8099	0.982659	0.238882	19720
100253_23	100253	2215	7	11.4037	0.975723	0.180774	6425
100254_0	100254	3498	20	52.1541	0.987088	0.17168	9977
100254_1	100254	3552	48	112.615	0.987088	0.164925	9586
100254_10	100254	3699	24	56.7796	0.982783	0.177955	9577
100254_11	100254	3499	2	9.16598	0.954806	0.173887	9380
100254_13	100254	3708	4	23.4626	0.982066	0.173027	9782
100254_14	100254	3704	10	52.7007	0.987805	0.168945	10159
100254_15	100254	3717	18	90.4586	0.98924	0.177534	10089
100254_16	100254	3611	19	39.1931	0.973458	0.177226	10323
100254_18	100254	3472	12	25.8425	0.956241	0.183384	9278
100254_2	100254	3757	23	64.971	0.973458	0.175273	10104
100254_21	100254	3884	6	25.2481	0.974175	0.173984	10022
100254_26	100254	3619	13	29.3235	0.964849	0.176205	9930
100254_27	100254	3666	11	28.627	0.966284	0.203353	10046
100254_28	100254	3386	16	44.7926	0.985653	0.170658	9994
100254_29	100254	3425	5	26.7104	0.983501	0.170109	9821
100254_30	100254	3747	23	67.487	0.977762	0.174948	9990
100254_31	100254	3803	10	21.3662	0.960545	0.199553	9923
100254_32	100254	4086	16	48.1432	0.978479	0.184205	9399
100254_34	100254	3635	12	30.0242	0.97274	0.179175	9889
100254_35	100254	3713	10	47.9712	0.984218	0.185808	9693
100254_37	100254	3546	12	46.0256	0.979914	0.168276	9996
100254_38	100254	3378	2	15.5615	0.968436	0.18635	9943
100254_4	100254	3521	12	66.7256	0.989957	0.169621	2989
100254_40	100254	3898	7	34.2546	0.984935	0.19122	9581
100254_46	100254	3599	5	32.2549	0.985653	0.177672	9927
100254_47	100254	3590	11	40.8345	0.984218	0.180359	9561
100254_55	100254	3512	3	20.9621	0.980631	0.175877	3852
100254_56	100254	3585	9	32.2436	0.979914	0.171734	10038
100254_6	100254	3619	12	44.2113	0.982066	0.178519	4063
100254_67	100254	3339	9	25.2083	0.967719	0.168436	9671
100254_7	100254	3487	14	33.3071	0.979197	0.165931	5793
100254_75	100254	3356	5	25.8407	0.979914	0.16574	10114
100254_9	100254	3941	32	127.066	0.991392	0.182319	6789
100254_99	100254	3531	9	24.2527	0.962697	0.183293	1291
100259_1	100259	2719	18	10.0202	0.977255	0.167482	41176
100259_4	100259	2594	15	10.8988	0.974981	0.19245	11627
100259_6	100259	2593	13	12.7602	0.977255	0.163725	6557
100262_0	100262	3345	16	25.366	0.98232	0.202514	6922
100262_1	100262	4187	9	9.15119	0.973833	0.219633	6919
100262_10	100262	3042	53	16.8173	0.958982	0.214077	1345
100262_11	100262	3723	16	10.2032	0.965347	0.22719	1187
100262_25	100262	3628	8	6.52456	0.960396	0.218318	1857
100262_4	100262	3160	10	8.71122	0.973126	0.216197	903
100262_6	100262	3143	15	16.7443	0.985149	0.20754	1375
100262_7	100262	3117	10	10.1118	0.975955	0.210713	940
100262_8	100262	3158	13	13.097	0.971004	0.212239	446
100263_1	100263	2864	24	13.0382	0.964608	0.204938	11988
100265_3	100265	3614	9	36.7856	0.965269	0.117414	106103
100265_8	100265	3671	14	69.9833	0.960026	0.123483	85737
100271_0	100271	3409	9	61.9206	0.985465	0.185305	1922
100271_1	100271	3192	13	56.9039	0.979651	0.179912	1945
100271_10	100271	2961	3	16.0951	0.957122	0.175874	2033
100271_12	100271	3175	9	37.9251	0.962209	0.176671	1881
100271_16	100271	4314	7	21.9938	0.956395	0.204387	1899
100271_17	100271	3668	4	19.995	0.952762	0.187933	1605
100271_2	100271	3003	5	33.5955	0.965843	0.175203	2057
100271_21	100271	3028	1	14.981	0.957122	0.180284	1892
100271_24	100271	3360	2	35.7788	0.978198	0.17765	1511
100271_4	100271	4362	10	80.3275	0.994186	0.210538	1217
100271_44	100271	3227	18	53.971	0.960756	0.180136	146
100271_54	100271	3193	8	16.6311	0.958576	0.183539	1186
100271_8	100271	4355	16	184.34	0.99564	0.195527	1726
100272_0	100272	4327	12	178.522	0.997881	0.2362	72488
100272_1	100272	2993	22	1091.47	0.998941	0.161089	73467
100278_0	100278	2443	10	25.707	0.988683	0.129647	65813
100278_12	100278	2607	6	5.38084	0.99177	0.148449	62852
100278_2	100278	2496	9	3.62983	0.961934	0.152531	63350
100278_22	100278	2500	4	2.35117	0.957819	0.16452	53993
100278_3	100278	2646	9	5.70669	0.978395	0.160669	18939
100280_1	100280	2141	20	9.24525	0.976883	0.15706	56888
100280_13	100280	2010	14	6.89056	0.960477	0.168431	57291
100280_5	100280	2139	11	13.9365	0.991797	0.144983	3484
100282_0	100282	2694	12	22.8212	0.984097	0.156106	68165
100282_1	100282	2845	20	168.415	1	0.151368	68420
100282_3	100282	2681	3	10.7306	0.978372	0.158288	46399
100282_8	100282	2750	5	17.852	0.98028	0.156948	18321
100289_0	100289	2720	3	13.8739	0.9992	0.15727	83150
100289_1	100289	2814	5	24.7215	1	0.157437	83433
100289_10	100289	2793	10	21.4462	0.9992	0.164535	83151
100289_6	100289	2835	2	12.4671	1	0.169547	83049
100296_1	100296	1635	2	4.55791	0.996071	0.184469	20903
100303_6	100303	1747	3	9.01565	0.986454	0.131578	110295
100344_15	100344	2443	10	21.9194	0.99287	0.165391	41903
100344_3	100344	2437	28	19.2552	0.999109	0.162166	12047
100344_4	100344	2609	32	30.303	1	0.151766	35951
100362_1	100362	3510	8	122.729	0.997531	0.177867	82721
100362_10	100362	3306	12	31.7877	0.995885	0.18574	83462
100362_18	100362	3098	6	3.80136	0.959671	0.198738	83446
100362_2	100362	3555	21	161.954	0.998354	0.180197	82948
100362_24	100362	3461	21	64.1481	0.997531	0.18412	83462
100362_25	100362	3203	8	51.5652	0.996708	0.178082	6219
100362_3	100362	3268	4	8.21981	0.974486	0.205845	17348
100362_4	100362	3333	10	22.5821	0.995885	0.185013	81685
100362_5	100362	3212	9	4.76533	0.968724	0.20227	75132
100362_56	100362	3523	7	11.4223	0.987654	0.183391	8883
100362_64	100362	3420	3	14.8032	0.994239	0.180125	36856
100362_7	100362	3407	6	34.1835	0.997531	0.173937	82270
100369_0	100369	2096	1	3.08984	0.95598	0.19172	47134
100369_1	100369	2631	11	14.6622	0.986711	0.179949	62363
100370_1	100370	3298	14	10.9548	0.979226	0.195778	33912
100370_4	100370	3926	4	6.98254	0.982092	0.240086	2832
100404_0	100404	2166	21	21.6764	0.984127	0.145891	54901
100404_1	100404	2180	20	55.3969	0.991182	0.14011	54663
100404_14	100404	2034	9	10.583	0.978836	0.146857	42692
100404_17	100404	2078	4	6.16498	0.9806	0.156282	45602
100404_19	100404	1989	4	3.95664	0.953263	0.158507	28493
100404_23	100404	2012	15	15.4413	0.977072	0.146827	53909
100404_26	100404	1952	11	5.62353	0.955026	0.15923	50975
100404_28	100404	2006	8	10.0635	0.971781	0.138766	46587
100404_3	100404	2134	17	31.0223	0.987654	0.139747	25212
100404_32	100404	1919	6	5.83386	0.958554	0.14972	54569
100404_49	100404	2113	9	21.3	0.985891	0.14538	43046
100404_6	100404	2130	21	40.4828	0.988536	0.143782	15009
100404_9	100404	2023	14	18.2231	0.982363	0.13832	3853
100409_2	100409	2499	15	23.5566	0.99915	0.155733	12272
100409_3	100409	2201	2	3.27858	0.979609	0.186252	3433
100409_9	100409	2695	38	16.766	0.997451	0.158627	5531
100418_13	100418	1965	5	5.58936	0.997012	0.151542	35532
100418_2	100418	1954	7	4.46001	0.994024	0.165387	2696
100429_0	100429	2077	13	12.9058	0.997664	0.17894	61120
100429_1	100429	1998	16	22.8758	1	0.177265	61256
100429_4	100429	1831	5	3.12205	0.975467	0.19783	17568
100429_6	100429	1868	3	2.91682	0.969626	0.190114	20870
100429_8	100429	2180	21	24.9317	0.998832	0.192348	17446
100429_9	100429	1899	2	1.92249	0.953271	0.215393	3143
100431_0	100431	1475	20	66.4715	0.997945	0.152933	45427
100451_3	100451	1943	7	5.62801	0.998542	0.165461	55525
100457_3	100457	2219	7	4.51129	0.971638	0.169934	2516
100484_0	100484	2295	21	180.355	0.999231	0.147093	63639
100530_0	100530	2548	10	24.2334	0.985857	0.185005	65532
100530_1	100530	2527	19	615.63	1	0.178502	66248
100530_10	100530	2515	11	38.4865	0.990017	0.181389	5173
100530_11	100530	2544	8	43.4256	0.991681	0.180878	65352
100530_15	100530	2595	6	24.9573	0.983361	0.18516	65831
100530_3	100530	2539	11	25.0349	0.988353	0.18402	65502
100530_7	100530	2654	20	95.2359	0.994176	0.196684	35299
100530_9	100530	2391	7	9.00679	0.96173	0.204243	58495
100561_1	100561	2550	1	7.14437	0.992642	0.154507	98712
100562_1	100562	2415	12	34.6713	0.986047	0.157514	34615
100562_10	100562	2404	6	13.5066	0.963455	0.158072	32655
100562_100	100562	2435	8	16.0918	0.97608	0.161462	34811
100562_11	100562	2509	9	13.5736	0.968771	0.169562	34358
100562_12	100562	2544	10	120.689	0.995349	0.158745	34716
100562_14	100562	2554	13	33.7701	0.988704	0.153445	33396
100562_20	100562	2491	15	30.6229	0.987375	0.161006	34144
100562_21	100562	2523	8	13.0199	0.96412	0.175409	8412
100562_22	100562	2375	1	4.87937	0.950831	0.172197	33836
100562_24	100562	2420	14	20.422	0.974086	0.159276	32324
100562_26	100562	2433	5	13.2903	0.962126	0.161925	17407
100562_28	100562	2307	4	9.10321	0.957475	0.161913	5405
100562_3	100562	2460	4	16.2051	0.984718	0.157972	34545
100562_32	100562	2399	3	5.74182	0.951495	0.177168	34600
100562_34	100562	2428	16	14.7467	0.959468	0.161629	19740
100562_39	100562	2374	16	14.2438	0.956146	0.16471	34606
100562_4	100562	2619	11	61.1506	0.994684	0.173583	34606
100562_43	100562	2467	14	18.8154	0.9701	0.162272	34261
100562_46	100562	2355	4	9.24795	0.960133	0.163784	15311
100562_47	100562	2471	8	13.0307	0.96412	0.161231	7826
100562_48	100562	2545	2	15.9577	0.990033	0.155407	21324
100562_5	100562	2559	16	120.161	0.996013	0.157913	8006
100562_50	100562	2422	4	8.9832	0.956146	0.166724	33946
100562_53	100562	2506	13	15.0899	0.967442	0.168824	32538
100562_6	100562	2706	17	155.266	0.996013	0.16407	23059
100562_73	100562	2429	6	24.8534	0.982724	0.157547	12471
100562_79	100562	2345	6	12.5143	0.982724	0.148503	2158
100562_8	100562	2432	12	15.9623	0.969435	0.1586	17858
100562_9	100562	2423	9	18.3179	0.972757	0.157668	2032
100575_0	100575	5633	9	9.24876	0.997846	0.183862	64962
100575_13	100575	4634	9	1.98036	0.950458	0.199336	47168
100575_2	100575	5642	10	8.13255	0.996769	0.203099	10367
100575_3	100575	4854	3	1.92313	0.97469	0.202632	8561
100646_0	100646	1896	45	285.919	1	0.151233	41970
100646_1	100646	1874	19	303.835	1	0.161578	43953
100646_17	100646	1731	13	106.985	0.99823	0.146228	42246
100646_3	100646	1732	6	32.5713	0.988496	0.146454	43356
100646_4	100646	1832	10	89.9976	0.99823	0.150222	43347
100646_5	100646	1955	14	117.425	1	0.158468	22751
100651_0	100651	3231	9	20.8847	0.993056	0.196981	57239
100651_1	100651	3041	16	143.956	0.993056	0.186078	57512
100651_11	100651	3075	11	36.2024	0.990451	0.194696	57202
100651_15	100651	3381	6	8.73397	0.990451	0.200482	55162
100651_16	100651	3241	16	23.4438	0.99566	0.199552	11806
100651_18	100651	2870	7	7.24417	0.978299	0.197225	56803
100651_2	100651	3178	21	28.3233	0.994792	0.190821	56197
100651_4	100651	2922	1	6.42003	0.984375	0.198313	6010
100651_48	100651	2915	2	2.90122	0.971354	0.210279	34224
100651_58	100651	3439	6	10.3556	0.993056	0.208783	3202
100651_63	100651	3291	7	4.9308	0.970486	0.245599	55173
100653_0	100653	2497	25	77.03	0.996622	0.174271	35498
100653_1	100653	2468	13	119.271	0.998311	0.166341	35595
100653_4	100653	2429	11	25.2233	0.978885	0.170925	35578
100672_1	100672	2473	8	94.3661	0.991291	0.16188	27465
100672_2	100672	2480	10	162.971	0.998416	0.162475	28786
100672_4	100672	2516	9	16.9294	0.990499	0.173444	27185
100690_0	100690	2302	3	7.04647	0.994702	0.13439	65979
100700_1	100700	2620	9	180.299	0.997651	0.150258	165587
100701_3	100701	2307	9	76.1554	0.998071	0.125741	99665
100701_6	100701	2263	23	327.141	1	0.116494	100622
100723_1	100723	2616	17	88.4841	0.995138	0.181341	58032
100723_10	100723	2740	21	79.8738	0.992707	0.183343	57632
100723_2	100723	2623	13	84.5957	0.991896	0.178694	57798
100723_21	100723	2714	22	96.6797	0.996759	0.184417	52397
100723_23	100723	2753	28	80.5713	0.994327	0.183081	50626
100723_27	100723	2665	1	9.58197	0.980551	0.191648	57346
100723_30	100723	2553	3	8.51836	0.961912	0.18998	57260
100723_4	100723	2995	18	90.6415	0.994327	0.188283	57400
100723_41	100723	2628	10	14.9498	0.964344	0.184844	56700
100723_51	100723	2528	6	10.907	0.958671	0.184571	57194
100723_6	100723	2421	13	37.1879	0.982982	0.177575	57451
100723_8	100723	2434	6	39.1806	0.991896	0.177922	11870
100730_0	100730	2741	19	61.2259	0.999114	0.175439	86368
100730_2	100730	2594	9	52.237	0.999114	0.169622	40622
100730_3	100730	2872	9	13.1271	0.992028	0.191421	5152
100730_5	100730	2561	1	6.35375	0.985828	0.17643	62047
100743_0	100743	4445	17	38.0948	0.997704	0.235666	38427
100743_4	100743	3412	15	77.8154	0.998852	0.189286	10925
100743_8	100743	3207	1	3.85114	0.965557	0.222713	10747
100782_0	100782	1676	7	37.6456	1	0.106817	83326
100784_0	100784	1198	9	32.5082	0.998913	0.14992	28094
100784_12	100784	1199	9	11.8175	0.991304	0.155681	27488
100784_3	100784	1135	1	5.00552	0.968478	0.191779	28302
100784_4	100784	1173	1	8.68623	0.988043	0.167051	27979
100784_5	100784	1212	17	25.2876	0.995652	0.157516	4481
100784_8	100784	1153	3	15.5404	0.994565	0.162087	28144
100810_0	100810	2431	8	149.358	0.987452	0.190077	55506
100839_2	100839	2431	2	3.52863	0.965841	0.196062	3938
100839_5	100839	2427	1	2.91736	0.957133	0.187734	5671
100870_0	100870	2772	3	5.9879	0.978723	0.165152	21834
100872_1	100872	2172	20	473.288	1	0.107092	153463
100872_11	100872	1973	4	6.99349	0.975198	0.130575	130966
100872_5	100872	2165	14	164.189	0.998016	0.101433	133938
100884_5	100884	2027	3	8.83349	0.975397	0.181622	7390
100902_10	100902	3798	1	2.2816	0.953827	0.203651	36249
100902_12	100902	3970	1	2.29396	0.952207	0.196337	37839
100902_2	100902	3972	2	6.33808	0.996355	0.170245	23443
100902_3	100902	3961	8	49.8732	0.99595	0.163504	4307
100902_5	100902	3961	2	9.26216	0.985419	0.191269	24923
100902_8	100902	3824	1	1.79613	0.950587	0.199954	3647
100909_0	100909	2541	19	18.1175	0.980312	0.142837	62561
100909_10	100909	2454	3	4.06512	0.956522	0.156617	42952
100909_11	100909	2482	5	5.39085	0.971288	0.148106	7388
100909_7	100909	2591	19	14.5275	0.984413	0.146396	18534
100909_8	100909	2669	27	17.5767	0.980312	0.149803	3348
100933_0	100933	1604	12	49.466	0.998847	0.16313	29545
100933_10	100933	1666	11	47.5877	0.998847	0.179239	29571
100933_2	100933	1681	10	43.1524	1	0.170643	29687
100933_25	100933	1537	2	4.10666	0.975779	0.189518	4294
100933_3	100933	1670	6	20.4003	0.995386	0.182288	29528
100933_4	100933	1599	16	50.3425	0.998847	0.166607	9315
100933_5	100933	1626	6	15.4894	0.99654	0.172751	29495
100968_1	100968	1899	4	76.857	0.995902	0.105333	18899
100980_0	100980	1751	9	6.41042	0.994033	0.146728	94121
100980_2	100980	1706	10	4.9357	0.98568	0.148637	86403
100989_0	100989	2913	6	15.0656	0.992604	0.134504	57993
100989_10	100989	2950	1	3.78824	0.984714	0.159865	55974
100989_13	100989	3082	5	6.72636	0.995069	0.147132	35346
100989_14	100989	2962	1	3.76403	0.988659	0.157284	51153
100989_16	100989	2875	1	6.54395	0.988659	0.155408	53761
100989_2	100989	2941	1	20.4403	0.99359	0.121539	17396
100989_7	100989	2926	1	3.09842	0.973373	0.179315	4223
101021_0	101021	2703	4	11.1907	0.986348	0.185325	34409
101021_14	101021	2589	3	5.58784	0.967577	0.186324	33711
101021_2	101021	2823	14	61.8382	0.998294	0.174638	34699
101021_3	101021	2749	12	44.0634	0.996587	0.174799	16969
101021_4	101021	2713	16	23.2627	0.992321	0.175627	29762
101021_53	101021	2666	4	6.17383	0.966724	0.1777	32837
101021_6	101021	2695	18	17.4805	0.982935	0.179386	31325
101021_9	101021	2828	14	23.707	0.994027	0.186133	32192
101029_0	101029	2252	19	56.8954	0.998071	0.196549	100316
101029_1	101029	2235	4	23.4842	0.994214	0.181156	99878
101029_4	101029	2206	22	96.7828	1	0.181142	77612
101029_5	101029	2004	3	17.0363	0.99325	0.173348	94041
101029_8	101029	2098	2	5.93697	0.966249	0.199368	32091
101057_0	101057	2408	13	16.5525	0.992665	0.170017	69558
101057_1	101057	2599	13	25.5256	0.997555	0.179761	79594
101057_13	101057	2537	12	11.9124	0.979218	0.182276	78568
101057_20	101057	2204	10	6.72349	0.964548	0.191209	4696
101057_4	101057	2529	10	10.1521	0.976773	0.180999	47870
101057_5	101057	2572	13	16.156	0.98533	0.176542	14591
101057_6	101057	2568	5	14.6774	0.992665	0.17305	15685
101057_8	101057	2490	11	9.87094	0.977995	0.181287	6840
101060_0	101060	2387	12	44.8304	0.996127	0.172009	20045
101060_1	101060	2483	15	119.628	0.996902	0.178174	20164
101060_13	101060	2451	1	20.2169	0.996127	0.176988	20089
101060_14	101060	2442	8	34.772	1	0.175526	20106
101060_15	101060	2283	13	4.06598	0.97134	0.22436	6790
101060_2	101060	2390	14	44.0579	0.997676	0.176933	20159
101060_25	101060	2406	4	3.39055	0.986057	0.193458	19334
101060_3	101060	2433	2	15.4159	0.998451	0.174362	3012
101065_9	101065	3086	9	18.4147	0.984211	0.148927	3060
101072_2	101072	1846	11	40.2443	0.958882	0.12983	16130
101072_4	101072	2018	8	19.499	0.995066	0.133288	7348
101072_6	101072	1904	11	12.0265	0.986842	0.140716	849
101076_1	101076	2474	2	3.2372	0.974808	0.167411	32308
101076_2	101076	2687	5	39.5889	1	0.112951	41879
101112_0	101112	1939	15	14.2157	0.98961	0.186255	104
101112_1	101112	2013	15	14.6502	0.996104	0.172808	164
101132_0	101132	2961	11	69.2277	1	0.16041	77824
101132_10	101132	2837	6	4.3033	0.984058	0.184822	3579
101136_0	101136	2836	18	22.2517	0.991124	0.195809	41565
101136_1	101136	2512	14	14.5642	0.97929	0.186658	34790
101136_11	101136	2372	10	8.85284	0.973373	0.194208	4582
101136_14	101136	2277	14	6.3109	0.951677	0.205127	12735
101136_15	101136	2342	11	7.67494	0.961538	0.19048	41352
101136_18	101136	2386	9	9.67314	0.97929	0.185101	40827
101136_2	101136	2545	20	35.7723	0.988166	0.188095	38743
101136_22	101136	2629	17	10.39	0.968442	0.218896	40903
101136_8	101136	2515	13	27.2146	0.990138	0.1836	3550
101136_9	101136	2301	5	7.42548	0.966469	0.185214	3106
101151_0	101151	2426	55	77.4194	0.995283	0.172003	92641
101151_10	101151	2175	1	4.68451	0.955189	0.200067	92865
101151_2	101151	2469	11	21.7671	0.983491	0.181951	78521
101157_0	101157	2716	10	28.4804	0.994424	0.172668	69337
101157_18	101157	2664	8	22.9484	0.991636	0.177102	11240
101157_21	101157	2740	13	17.8724	0.986989	0.175311	15892
101157_3	101157	2631	21	21.6523	0.986989	0.178563	8160
101160_9	101160	2076	9	5.20576	0.971003	0.190715	4611
101168_9	101168	2026	6	6.54397	0.986053	0.17891	6961
101211_2	101211	1642	1	8.52023	1	0.145163	10655
101244_1	101244	2424	1	4.28055	0.983503	0.178806	54624
101244_6	101244	2238	5	2.80475	0.965736	0.176561	6803
101246_12	101246	2521	8	10.1021	0.966775	0.171831	45314
101246_13	101246	2746	21	12.3885	0.960292	0.17209	42970
101246_15	101246	2590	20	13.4524	0.973258	0.166769	4876
101246_17	101246	2548	12	11.5144	0.975689	0.168321	32319
101246_4	101246	2697	13	8.78379	0.950567	0.185398	8781
101246_5	101246	2534	10	10.9982	0.970016	0.166422	3687
101247_8	101247	2444	8	5.27991	0.988586	0.137043	13763
101248_0	101248	1800	7	32.2421	0.980695	0.154875	15176
101248_3	101248	1795	1	14.3627	0.977799	0.164345	15212
101255_2	101255	2466	13	28.088	0.991963	0.170581	40762
101292_0	101292	3368	14	62.5748	0.996278	0.196142	1041
101292_10	101292	2726	14	44.2968	0.995037	0.191112	979
101292_12	101292	3093	3	6.67365	0.961538	0.219575	1018
101292_13	101292	3239	11	25.6151	0.988834	0.197972	1024
101292_16	101292	2879	18	10.5404	0.965261	0.230907	1043
101292_26	101292	2796	6	8.1339	0.968983	0.20228	520
101292_28	101292	2927	6	6.41355	0.961538	0.20989	236
101292_3	101292	2896	12	13.1265	0.976427	0.203924	990
101292_31	101292	3000	6	6.21877	0.960298	0.235066	874
101292_4	101292	2640	4	13.3604	0.971464	0.192864	613
101292_47	101292	3431	4	15.5672	0.992556	0.216665	137
101292_50	101292	2975	23	31.4227	0.978908	0.196541	1042
101292_78	101292	2946	1	5.27832	0.957816	0.22091	106
101292_81	101292	3188	8	6.17283	0.952854	0.202032	1081
101292_84	101292	3146	2	16.4511	0.990074	0.200956	318
101292_9	101292	2858	15	20.6961	0.983871	0.191826	191
101294_0	101294	2621	45	101.967	1	0.172434	4638
101294_10	101294	2681	14	15.9034	0.988987	0.179484	402
101294_11	101294	2632	40	124.364	0.997797	0.161864	348
101294_14	101294	2728	44	19.2565	0.993392	0.183378	4742
101294_15	101294	2735	33	43.6187	0.996696	0.186646	4381
101294_17	101294	2685	21	99.6034	1	0.181158	3170
101294_19	101294	2461	5	18.2062	0.992291	0.191183	4757
101294_20	101294	2635	4	11.0526	0.994493	0.180705	4672
101294_22	101294	2680	37	63.4476	0.996696	0.175388	259
101294_23	101294	2870	41	108.647	0.998899	0.178879	4707
101294_26	101294	2633	9	19.8297	0.993392	0.177423	4596
101294_27	101294	2638	8	17.5045	0.996696	0.179651	2620
101294_28	101294	2342	3	3.20394	0.955947	0.21066	4529
101294_4	101294	2636	12	41.654	0.998899	0.173968	4642
101294_5	101294	2614	10	37.3971	0.994493	0.168413	4603
101294_51	101294	2875	11	10.0319	0.981278	0.233498	2418
101294_52	101294	2841	9	23.026	0.984581	0.24342	3117
101294_7	101294	2563	16	61.057	0.997797	0.185681	238
101294_80	101294	2749	7	7.75103	0.98348	0.187631	385
101294_9	101294	2750	13	15.9493	0.995595	0.187638	449
101295_1	101295	2967	8	4.61502	0.983025	0.167729	93752
101295_2	101295	3342	23	9.94032	0.989198	0.168816	113078
101295_3	101295	3546	11	8.92632	0.994599	0.171604	120809
101295_4	101295	3614	7	13.3568	0.997685	0.157803	120125
101300_1	101300	3723	9	126.543	0.997439	0.1944	4249
101300_10	101300	3199	13	276.772	0.997439	0.183247	4612
101300_105	101300	3257	2	72.7762	0.989757	0.185349	4110
101300_11	101300	3459	10	130.914	0.99872	0.185947	4696
101300_110	101300	3501	13	226.272	0.99872	0.187829	4727
101300_111	101300	4055	1	2.4773	0.957746	0.226873	1576
101300_116	101300	4118	1	5.16755	0.983355	0.248777	4161
101300_12	101300	3420	24	181.346	0.997439	0.186843	4087
101300_127	101300	3006	2	3.8252	0.978233	0.194392	4552
101300_13	101300	4783	1	3.82091	0.964149	0.232421	4632
101300_130	101300	3436	10	113.665	0.997439	0.187226	3923
101300_133	101300	3940	1	10.3021	0.996159	0.197425	389
101300_15	101300	3627	6	121.182	0.997439	0.192365	4775
101300_17	101300	3783	9	32.0878	0.99872	0.193803	4952
101300_170	101300	5125	1	5.27609	0.971831	0.239663	4833
101300_18	101300	3624	12	232.715	0.997439	0.188573	4187
101300_19	101300	4025	12	252.227	1	0.203009	4149
101300_2	101300	3573	10	129.262	1	0.185674	4615
101300_20	101300	3522	7	57.0351	0.99872	0.229561	3967
101300_21	101300	3786	23	182.825	0.99872	0.193895	4617
101300_22	101300	3291	5	184.401	1	0.184776	4642
101300_24	101300	3201	5	230.182	0.996159	0.183025	4188
101300_25	101300	3301	1	35.5888	0.997439	0.188721	4065
101300_26	101300	3634	14	88.6181	1	0.186642	5029
101300_27	101300	3564	18	104.544	0.997439	0.189445	4622
101300_3	101300	4050	10	48.5451	0.996159	0.197669	3950
101300_31	101300	5355	14	110.957	1	0.241293	1190
101300_32	101300	4146	8	106.2	1	0.199713	4625
101300_33	101300	4148	20	119.089	0.997439	0.204195	4630
101300_34	101300	3354	11	114.112	0.997439	0.187152	4559
101300_36	101300	3709	10	47.9101	0.984635	0.216094	4555
101300_37	101300	3186	1	58.6157	0.996159	0.183033	1376
101300_4	101300	3315	9	163.631	0.99872	0.186974	1814
101300_41	101300	3859	4	21.7414	0.99872	0.188029	1273
101300_42	101300	3482	1	8.52401	0.993598	0.202047	4642
101300_43	101300	3688	2	19.4659	0.997439	0.190186	4718
101300_47	101300	3329	7	138.636	1	0.188127	4666
101300_49	101300	4461	2	10.8298	0.991037	0.219797	4027
101300_51	101300	4546	7	46.5511	0.99872	0.220244	4861
101300_52	101300	4205	5	116.033	0.99872	0.212024	462
101300_59	101300	4291	4	25.0163	0.99872	0.210422	4119
101300_6	101300	3505	13	210.184	0.99872	0.18681	3977
101300_64	101300	4710	12	125.221	0.994878	0.216022	4637
101300_65	101300	3160	5	20.0157	0.994878	0.182508	4888
101300_67	101300	3511	4	61.0416	0.99872	0.186143	3935
101300_68	101300	4672	1	8.20615	0.983355	0.235741	1434
101300_69	101300	4692	11	30.4208	0.997439	0.201215	1303
101300_7	101300	3813	31	276.221	0.99872	0.196027	4881
101300_70	101300	4018	6	52.5439	0.99872	0.199224	4149
101300_72	101300	3620	9	63.5643	0.99872	0.186351	4186
101300_74	101300	3472	2	55.8983	1	0.183834	4465
101300_75	101300	4248	6	39.915	0.99872	0.202219	4393
101300_77	101300	3367	7	35.092	0.997439	0.188258	4387
101300_8	101300	3678	14	84.7386	0.997439	0.196436	4713
101300_81	101300	4220	2	6.47588	0.991037	0.207696	507
101300_82	101300	3619	4	31.6823	0.997439	0.188213	4143
101300_87	101300	3473	12	88.998	0.996159	0.186427	3530
101300_9	101300	3588	14	132.986	0.997439	0.193284	4698
101300_90	101300	5739	20	94.8526	1	0.231638	4696
101300_96	101300	3994	12	62.0794	0.997439	0.194778	1965
101300_99	101300	3393	1	3.88153	0.983355	0.196807	842
101302_0	101302	3069	12	177.916	0.997701	0.194845	2517
101302_1	101302	2793	10	141.879	0.998851	0.191842	2558
101302_10	101302	2932	15	269.986	0.998851	0.195445	2552
101302_101	101302	3265	1	15.4916	0.989655	0.199144	2548
101302_103	101302	2617	6	93.0392	0.997701	0.193253	2285
101302_106	101302	2820	9	152.93	0.998851	0.194521	2322
101302_109	101302	2739	7	103.95	0.996552	0.193114	2270
101302_11	101302	3305	13	222.735	0.997701	0.197799	2317
101302_112	101302	2692	4	9.954	0.952874	0.23938	2413
101302_12	101302	3852	11	294.281	0.997701	0.197755	2397
101302_14	101302	4773	13	169.864	0.997701	0.211148	2341
101302_146	101302	2512	1	8.51075	0.968966	0.198768	2450
101302_15	101302	2757	27	377.152	0.997701	0.191643	2218
101302_151	101302	3632	13	187.865	0.998851	0.207748	2494
101302_17	101302	3094	9	134.013	0.996552	0.199679	2375
101302_18	101302	3368	10	148.91	0.998851	0.202301	2646
101302_19	101302	2851	14	115.767	0.998851	0.198748	2420
101302_2	101302	2967	21	254.821	0.998851	0.196851	2268
101302_20	101302	2814	6	257.485	0.997701	0.194638	2629
101302_22	101302	2778	5	66.8747	0.997701	0.19578	2343
101302_23	101302	3104	15	197.337	0.996552	0.200681	2567
101302_24	101302	2910	23	478.542	0.997701	0.19561	2355
101302_26	101302	3280	9	122.823	0.996552	0.198827	2222
101302_27	101302	3127	15	249.692	0.998851	0.195019	2448
101302_3	101302	3228	24	730.52	0.998851	0.198795	2571
101302_30	101302	2753	8	662.239	0.997701	0.192838	2252
101302_31	101302	3404	10	161.949	0.997701	0.192146	2315
101302_33	101302	3216	21	237.369	0.997701	0.204798	2432
101302_34	101302	3018	20	160.83	0.996552	0.202449	2228
101302_35	101302	2854	16	342.5	0.996552	0.195281	2590
101302_36	101302	2781	15	201.384	0.996552	0.193038	2531
101302_4	101302	2685	10	320.068	0.997701	0.192462	2331
101302_41	101302	3045	14	339.937	0.996552	0.197953	2384
101302_42	101302	3474	6	73.0414	0.995402	0.200475	2498
101302_43	101302	2930	10	91.3498	0.996552	0.193429	2540
101302_44	101302	3176	12	135.012	0.996552	0.205497	2514
101302_45	101302	3215	15	209.046	0.996552	0.203124	2254
101302_47	101302	2901	13	331.186	0.998851	0.193332	2342
101302_49	101302	3105	12	267.014	0.998851	0.199821	2288
101302_52	101302	2853	10	106.802	0.997701	0.197695	2454
101302_54	101302	2701	3	65.1171	0.995402	0.193553	741
101302_58	101302	2751	6	114.825	0.998851	0.195274	2326
101302_6	101302	3970	6	111.784	0.997701	0.199253	2355
101302_60	101302	2653	11	73.557	0.994253	0.196901	391
101302_63	101302	3076	7	95.4294	0.997701	0.199309	2379
101302_64	101302	2708	1	8.79157	0.973563	0.212037	2340
101302_65	101302	2944	12	43.3358	0.990805	0.199819	2351
101302_66	101302	3073	3	32.5	0.997701	0.196846	2259
101302_70	101302	2511	3	11.4049	0.962069	0.203058	2240
101302_74	101302	4265	18	267.178	0.997701	0.205597	2425
101302_79	101302	2908	7	54.1648	0.996552	0.215662	2581
101302_8	101302	4216	3	39.0194	0.994253	0.197536	2379
101302_81	101302	2872	11	63.917	0.995402	0.196338	2293
101302_84	101302	2644	6	64.3844	0.997701	0.197599	2409
101302_94	101302	3239	7	34.6437	0.989655	0.20971	352
101302_95	101302	2834	9	100.169	0.998851	0.20119	218
101303_0	101303	3205	49	15.29	0.967105	0.170131	96296
101304_1	101304	2045	2	3.18189	0.964758	0.185982	37037
101304_5	101304	2201	12	25.8149	1	0.162368	3127
101304_7	101304	2141	10	13.0208	0.993392	0.165533	17554
101306_0	101306	2889	13	881.779	0.998535	0.152061	22484
101306_2	101306	2527	10	299.041	0.989011	0.154316	22644
101306_20	101306	2749	4	113.109	0.989744	0.153064	21637
101306_5	101306	3121	11	150.876	0.975092	0.176742	24453
101310_0	101310	1979	8	18.2333	0.978702	0.18272	10945
101310_1	101310	2105	6	21.6212	0.984787	0.185278	10658
101310_13	101310	1940	10	15.7323	0.957404	0.184078	11114
101310_15	101310	1881	4	8.55984	0.951318	0.186516	11111
101310_2	101310	2166	18	41.3766	0.988844	0.18345	11022
101310_28	101310	2006	20	22.1952	0.971602	0.186846	10945
101310_4	101310	2158	18	23.1678	0.981744	0.187775	3430
101310_43	101310	2007	5	8.88363	0.950304	0.189374	7113
101310_5	101310	1987	12	11.8337	0.956389	0.185697	7237
101310_8	101310	1985	4	9.10367	0.96146	0.187054	1134
101310_9	101310	2088	11	35.1176	0.990872	0.182891	712
101313_1	101313	3220	7	164.434	0.983204	0.211984	9688
101313_10	101313	3807	21	97.9853	0.967054	0.230565	10163
101313_18	101313	3555	25	199.152	0.984496	0.223209	10127
101313_2	101313	3340	34	547.51	0.998062	0.192801	9452
101313_22	101313	3714	10	217.952	0.986434	0.227695	9863
101313_27	101313	4215	5	71.1377	0.979328	0.213244	9676
101313_42	101313	3451	19	41.1759	0.965762	0.22282	9805
101313_5	101313	3850	18	350.332	0.992894	0.209537	9638
101313_74	101313	4660	8	40.5183	0.958656	0.215027	9656
101314_0	101314	2422	1	19.3842	0.998037	0.14008	61877
101315_0	101315	2612	9	9.21746	0.9556	0.206337	11055
101315_11	101315	2375	11	11.212	0.962664	0.200118	2482
101315_4	101315	2291	9	11.1305	0.956609	0.199489	10858
101315_9	101315	2481	15	13.2973	0.958628	0.205365	703
101319_1	101319	2186	20	360.757	1	0.156414	41203
101319_2	101319	2304	19	29.8657	0.982634	0.164623	40894
101319_21	101319	2221	1	15.3619	0.988423	0.157048	40935
101319_3	101319	2135	12	179.344	0.998553	0.149197	39192
101321_0	101321	3165	16	9.89567	0.969623	0.198007	83864
101321_2	101321	2899	10	12.9054	0.985419	0.180657	54401
101321_3	101321	3128	12	6.51879	0.951397	0.194249	81784
101326_1	101326	2235	1	24.5004	0.986464	0.220888	77618
101326_14	101326	1798	3	5.06393	0.970389	0.207375	14258
101327_4	101327	3043	11	11.8503	0.99222	0.170247	59891
101334_5	101334	2093	3	2.58868	0.974542	0.232662	57586
101337_10	101337	5400	28	216.07	0.960495	0.210198	9259
101337_11	101337	4376	8	170.19	0.970072	0.204801	9308
101337_135	101337	5171	13	94.5881	0.951317	0.225437	8738
101337_14	101337	4278	17	416.779	0.984437	0.204169	9418
101337_15	101337	5848	9	85.0747	0.957702	0.199939	9211
101337_16	101337	4509	22	115.574	0.955307	0.206111	9264
101337_2	101337	5385	18	146.805	0.961293	0.208143	8991
101337_27	101337	4826	25	159.554	0.968476	0.201866	9162
101337_29	101337	4352	8	495.762	0.985235	0.199914	8948
101337_3	101337	4419	12	907.616	0.986433	0.202176	9186
101337_37	101337	4885	15	144.611	0.957302	0.208246	9097
101337_45	101337	4501	17	498.997	0.986433	0.202836	8875
101337_5	101337	4971	28	888.81	0.988827	0.216327	643
101337_54	101337	4344	12	344.892	0.984437	0.201547	543
101337_55	101337	5561	13	174.746	0.954908	0.216141	6566
101337_57	101337	4570	5	59.3726	0.953711	0.206634	7267
101337_75	101337	4325	12	168.881	0.959298	0.208295	8837
101337_87	101337	4365	11	104.616	0.952115	0.198227	3304
101338_17	101338	3604	9	17.4743	0.977755	0.203414	464
101338_28	101338	3736	1	21.7935	0.9909	0.199083	395
101338_3	101338	3931	1	20.1972	0.987867	0.205537	707
101338_36	101338	3950	5	9.16495	0.968655	0.241062	140
101338_4	101338	3668	2	27.5909	0.982811	0.2051	783
101338_47	101338	4223	6	18.5142	0.986855	0.224833	753
101338_62	101338	4746	3	6.82598	0.9636	0.240141	753
101338_77	101338	3410	4	8.67843	0.965622	0.205615	678
101338_8	101338	5267	10	23.3071	0.985844	0.224055	163
101345_0	101345	5203	25	291.69	0.990009	0.217404	1962
101345_10	101345	5715	31	139.844	0.984559	0.219952	1339
101345_11	101345	7484	17	122.419	0.978202	0.22167	1467
101345_14	101345	5872	27	165.822	0.976385	0.216418	361
101345_149	101345	4418	3	46.9964	0.962307	0.221975	1985
101345_18	101345	6186	5	48.7096	0.972752	0.221652	745
101345_19	101345	5671	20	177.164	0.985922	0.215021	1614
101345_22	101345	6742	24	130.725	0.980472	0.225748	1728
101345_23	101345	6313	9	111.257	0.984105	0.22771	1711
101345_27	101345	6402	7	26.4217	0.970027	0.240797	1555
101345_29	101345	7134	13	67.1774	0.970936	0.215398	1493
101345_31	101345	6589	13	72.5259	0.97366	0.231209	1460
101345_33	101345	7299	10	43.3438	0.969119	0.245711	1717
101345_4	101345	5986	11	127.601	0.976839	0.22495	158
101345_40	101345	5262	9	65.0544	0.972752	0.217924	229
101345_41	101345	5874	6	71.6309	0.982289	0.231497	1623
101345_42	101345	5309	4	74.6597	0.972752	0.220418	1527
101345_5	101345	5603	10	277.265	0.980926	0.227792	1513
101345_53	101345	6586	21	237.706	0.983651	0.220341	1657
101345_54	101345	5211	11	51.5174	0.976839	0.223898	1645
101345_55	101345	6251	8	81.1275	0.972752	0.220591	202
101345_56	101345	7567	13	67.8807	0.978656	0.221766	1704
101345_57	101345	4769	23	106.465	0.980926	0.211146	1292
101345_61	101345	5301	4	26.1247	0.967302	0.215892	1874
101345_65	101345	6133	6	44.0563	0.974114	0.235264	1552
101345_68	101345	5838	5	45.3718	0.974569	0.222521	1361
101345_7	101345	6099	20	147.18	0.973206	0.227423	1541
101345_8	101345	6002	8	139.315	0.979564	0.213511	608
101346_0	101346	4914	13	712.153	0.988005	0.199326	2528
101346_1	101346	6363	12	456.396	0.979167	0.200667	1969
101346_10	101346	5995	10	113.727	0.998106	0.214113	2465
101346_106	101346	6876	7	85.5276	0.997475	0.202479	2447
101346_109	101346	5235	3	111.875	0.996212	0.190884	2400
101346_11	101346	5378	7	246.332	0.992424	0.200236	2599
101346_111	101346	5460	2	77.3356	0.993056	0.196586	2186
101346_117	101346	7700	18	242.154	0.996212	0.209077	2536
101346_128	101346	10269	10	203.041	0.996843	0.210777	2327
101346_13	101346	4381	32	2195.36	0.996843	0.19112	2581
101346_133	101346	7257	10	302.458	0.996843	0.199557	2475
101346_137	101346	6395	6	60.1319	0.994949	0.196146	2544
101346_14	101346	6749	2	42.7626	0.982955	0.196646	2157
101346_149	101346	9472	13	210.478	0.995581	0.221367	2562
101346_154	101346	6612	10	350.824	0.995581	0.190867	2575
101346_160	101346	7860	14	181.602	0.995581	0.209095	2002
101346_167	101346	6297	15	270.187	0.997475	0.200945	2622
101346_177	101346	4446	14	657.891	0.998737	0.19619	2588
101346_18	101346	5096	44	1503.87	0.997475	0.197474	2431
101346_180	101346	10367	9	113.677	0.996843	0.24663	2556
101346_189	101346	7359	1	6.92019	0.967803	0.244227	1536
101346_19	101346	4990	10	457.17	0.995581	0.199088	2501
101346_20	101346	6397	12	463.954	0.983586	0.204576	2423
101346_23	101346	7603	23	830.192	0.984217	0.199025	2421
101346_26	101346	5199	6	376.754	0.997475	0.195569	2335
101346_28	101346	4322	6	317.558	0.994949	0.190727	2638
101346_29	101346	6087	6	82.6712	0.996843	0.210581	2350
101346_292	101346	9975	1	26.2513	0.992424	0.240812	2444
101346_30	101346	5226	12	509.974	0.978535	0.203235	1896
101346_31	101346	6318	42	1253.69	0.996843	0.199538	2584
101346_33	101346	4899	7	502.706	0.995581	0.193283	2252
101346_34	101346	7111	2	20.9318	0.992424	0.215787	2664
101346_38	101346	6840	10	386.235	0.995581	0.192208	2415
101346_39	101346	8799	6	79.7052	0.97096	0.22876	2666
101346_4	101346	5976	31	970.585	0.996843	0.188546	2516
101346_40	101346	6933	7	50.6326	0.996212	0.207221	2310
101346_41	101346	5227	25	570.793	0.996843	0.199599	2509
101346_43	101346	8169	3	28.8736	0.992424	0.213644	2349
101346_44	101346	4631	13	1050.92	0.998106	0.189792	2634
101346_46	101346	6477	10	530.054	0.996843	0.195287	2349
101346_47	101346	5660	16	854.898	0.998106	0.197142	2331
101346_48	101346	5233	9	365.614	0.996212	0.199975	2404
101346_5	101346	5935	25	904.333	0.996212	0.198234	2461
101346_54	101346	4519	13	508.511	0.998737	0.198838	2369
101346_56	101346	6691	1	37.7442	0.982323	0.202548	2463
101346_57	101346	5292	17	371.107	0.988005	0.201194	2243
101346_6	101346	7189	8	233.791	0.995581	0.192912	2313
101346_63	101346	6768	4	29.7778	0.994318	0.208105	2422
101346_64	101346	4412	11	809.182	0.996843	0.190722	2366
101346_67	101346	5962	3	148.352	0.996843	0.193527	2368
101346_7	101346	4322	10	662.028	0.995581	0.191914	2482
101346_71	101346	6909	9	189.189	0.996212	0.191224	2390
101346_73	101346	7456	38	704.546	0.997475	0.194324	2345
101346_74	101346	6554	10	98.958	0.996212	0.209503	2377
101346_75	101346	7647	10	309.406	0.996843	0.230886	2324
101346_85	101346	8254	14	181.208	0.996212	0.190186	2363
101346_88	101346	4932	7	59.9803	0.994949	0.242336	2470
101346_98	101346	5073	13	648.444	0.998106	0.192265	2100
101346_99	101346	6342	7	185.145	0.996843	0.186794	2135
101349_0	101349	1900	4	186.013	0.992945	0.135353	50488
101349_17	101349	1945	6	9.56539	0.997354	0.157535	10997
101349_18	101349	1896	3	10.0978	0.997354	0.152686	9485
101349_2	101349	1942	1	30.4776	1	0.138572	28729
101349_22	101349	2040	3	17.6892	1	0.150798	9054
101349_3	101349	1944	10	797.574	0.994709	0.138873	4998
101349_46	101349	1969	15	26.0595	0.999118	0.14653	7086
101349_5	101349	2014	3	13.2664	0.998236	0.156095	3434
101349_54	101349	1905	3	17.0675	0.998236	0.138239	42620
101349_57	101349	2103	1	32.6812	1	0.151842	37405
101349_60	101349	1915	1	3.53434	0.983245	0.161213	31487
101349_72	101349	2148	9	19.4344	0.993827	0.24382	4696
101349_74	101349	1881	1	2.59868	0.962963	0.185941	8068
101349_77	101349	1954	3	3.96485	0.972663	0.162241	6678
101349_91	101349	1942	2	25.3256	0.995591	0.143122	4738
101354_0	101354	2864	11	7.80175	0.977974	0.189937	61305
101354_1	101354	2713	5	77.8128	0.997357	0.171467	59608
101354_2	101354	2765	3	47.6028	0.996476	0.175645	4983
101354_6	101354	2792	18	7.21036	0.965639	0.183653	17736
101356_2	101356	2598	71	57.7756	0.997906	0.134543	7731
101356_4	101356	2470	4	7.30892	0.976963	0.147588	10660
101356_5	101356	2343	4	11.2318	0.993717	0.149026	6356
101359_10	101359	5326	37	34.1411	0.989565	0.180367	74574
101359_11	101359	5731	52	39.9822	0.989565	0.183628	63715
101359_12	101359	5609	24	15.1046	0.970435	0.190008	75499
101359_16	101359	5823	43	50.0525	0.991304	0.183397	75170
101359_19	101359	5170	9	7.76633	0.953043	0.187125	71646
101359_2	101359	5597	25	74.8518	0.996522	0.180484	74146
101359_39	101359	5291	13	13.3348	0.978261	0.189408	7730
101359_4	101359	5389	19	17.7115	0.981739	0.19373	21575
101359_43	101359	5086	3	5.94165	0.96087	0.195355	6156
101359_5	101359	5778	30	85.8138	0.997391	0.180465	12452
101359_6	101359	5623	21	31.1248	0.991304	0.182352	11099
101359_7	101359	5232	36	76.0648	0.990435	0.178588	4084
101359_8	101359	5368	21	21.9085	0.986087	0.180985	30237
101359_9	101359	5456	13	39.808	0.991304	0.177722	45178
101361_0	101361	2925	18	53.0436	0.985549	0.184385	81813
101361_18	101361	3004	10	53.6311	0.987476	0.180801	84355
101361_19	101361	2895	14	29.1022	0.977842	0.185268	86062
101361_2	101361	3041	12	75.3051	0.988439	0.179132	85213
101361_23	101361	2931	9	21.658	0.983622	0.183353	84707
101361_25	101361	3047	8	24.6117	0.978805	0.188323	81651
101361_28	101361	2910	9	60.9707	0.984586	0.180185	68979
101361_3	101361	3041	37	167.558	0.992293	0.18321	86300
101361_38	101361	3025	9	20.5502	0.973025	0.188979	85174
101361_4	101361	3048	23	80.4164	0.986513	0.189801	81589
101361_42	101361	2962	23	80.4366	0.988439	0.181468	83240
101361_6	101361	3108	26	92.2022	0.989403	0.180762	79650
101361_8	101361	3011	15	66.7945	0.987476	0.182267	83869
101361_9	101361	2894	3	25.7569	0.985549	0.187718	73978
101367_10	101367	4889	27	18.2868	0.993235	0.17867	75314
101367_13	101367	4544	4	25.3402	0.99408	0.162799	76045
101367_14	101367	4456	16	21.9221	0.993658	0.172898	75378
101367_2	101367	4754	10	45.0283	0.99704	0.171643	75667
101367_20	101367	4884	5	23.498	0.996195	0.171303	74904
101367_24	101367	4671	8	24.732	0.996617	0.176258	76128
101367_4	101367	4527	10	19.1857	0.993235	0.172441	22577
101367_46	101367	4437	5	5.98233	0.984355	0.177755	74387
101367_52	101367	5054	4	10.3932	0.991121	0.19697	74615
101367_66	101367	4257	7	4.48755	0.958985	0.184432	71990
101367_7	101367	4445	3	7.30253	0.984355	0.182638	50295
101367_8	101367	4956	13	31.1686	0.99704	0.175516	49616
101374_0	101374	2266	4	13.4987	0.979983	0.184092	2489
101374_1	101374	2525	19	37.4095	0.983319	0.212458	2508
101374_10	101374	2498	22	27.1004	0.966639	0.215476	2471
101374_118	101374	2174	20	18.8212	0.954128	0.195101	2009
101374_12	101374	2272	8	12.2455	0.964137	0.204084	2531
101374_13	101374	2263	13	32.7415	0.993328	0.180203	2493
101374_17	101374	2698	11	15.8453	0.959967	0.186414	420
101374_19	101374	2321	11	30.5388	0.994162	0.185496	2290
101374_2	101374	2429	15	53.1687	0.99583	0.180794	2522
101374_21	101374	2153	13	24.4541	0.981651	0.177364	268
101374_26	101374	2262	13	10.5058	0.95246	0.184616	382
101374_3	101374	2357	7	37.3077	0.994162	0.180148	1389
101374_31	101374	2229	4	11.2254	0.974145	0.178735	112
101374_5	101374	2377	90	137.896	0.996664	0.182293	2414
101374_53	101374	2222	6	11.5558	0.971643	0.189936	864
101374_7	101374	2128	19	20.668	0.962469	0.183026	1802
101374_8	101374	2883	10	44.253	0.996664	0.194466	195
101374_88	101374	2474	12	15.8534	0.960801	0.204525	2496
101374_9	101374	2367	11	28.6448	0.979983	0.200668	315
101375_1	101375	2523	8	19.3146	1	0.166114	59685
101378_0	101378	6978	43	480.579	0.99238	0.221272	543
101378_1	101378	6144	61	803.016	0.996414	0.205716	570
101378_11	101378	6098	18	156.055	0.981623	0.219434	441
101378_110	101378	8642	10	77.6634	0.965486	0.211436	468
101378_13	101378	4891	8	362.052	0.973106	0.212493	575
101378_138	101378	5675	1	28.6931	0.965935	0.213533	445
101378_15	101378	9145	14	114.856	0.971762	0.212648	519
101378_19	101378	6894	8	73.26	0.97983	0.230005	483
101378_2	101378	7214	18	168.155	0.980278	0.220582	338
101378_202	101378	5232	12	179.919	0.950695	0.209337	527
101378_22	101378	5392	10	63.3344	0.976692	0.210336	479
101378_23	101378	6394	2	34.6759	0.9619	0.217519	343
101378_34	101378	7344	71	469.235	0.984312	0.207841	426
101378_39	101378	6997	39	108.077	0.9619	0.214992	510
101378_5	101378	5247	12	251.578	0.987001	0.212633	415
101378_50	101378	7436	7	65.5771	0.967279	0.244869	145
101378_55	101378	9556	17	114.84	0.96952	0.228697	500
101378_56	101378	8361	8	31.9018	0.953832	0.21598	329
101378_59	101378	8835	20	107.657	0.960108	0.230906	508
101378_6	101378	7032	17	294.371	0.983864	0.207278	308
101378_65	101378	4888	1	51.2888	0.979381	0.205897	460
101378_8	101378	6631	4	50.4562	0.971313	0.225849	416
101378_90	101378	5132	3	39.6035	0.952936	0.218122	399
101379_5	101379	2639	9	7.0671	0.993412	0.15279	9682
101379_8	101379	2490	1	4.29404	0.992754	0.159472	4557
101380_0	101380	2926	7	248.489	0.996003	0.185375	6177
101380_1	101380	2791	14	7.1254	0.960831	0.202234	6748
101380_10	101380	3027	1	18.0043	0.992806	0.193253	6057
101380_13	101380	3026	4	12.6519	0.990408	0.194258	1404
101380_15	101380	3244	2	13.8579	0.98801	0.223579	5731
101380_19	101380	3019	3	36.3279	0.994404	0.185753	332
101380_20	101380	2893	4	10.9481	0.984812	0.22937	1290
101380_24	101380	2896	6	46.0525	0.990408	0.177795	1145
101380_25	101380	2653	5	14.6521	0.98801	0.187074	6341
101380_3	101380	3023	2	15.9153	0.982414	0.201689	1520
101380_35	101380	2531	4	5.43801	0.965627	0.200976	6326
101380_38	101380	3365	3	5.34344	0.964828	0.204012	3544
101380_47	101380	2770	1	31.4101	0.994404	0.19086	2792
101380_5	101380	2844	20	30.7778	0.996003	0.184223	6139
101380_6	101380	3082	27	34.5953	0.995204	0.200564	1473
101380_60	101380	2840	1	30.1171	0.992806	0.186637	418
101380_8	101380	3166	4	12.6495	0.985612	0.225365	510
101385_0	101385	2809	22	12.3096	0.966713	0.187281	52352
101385_10	101385	2814	29	9.91387	0.959778	0.188672	52180
101385_11	101385	2895	20	10.6312	0.975728	0.196189	51733
101385_2	101385	2816	21	7.87526	0.952843	0.194549	51457
101385_24	101385	2442	11	18.6989	0.963939	0.161914	31946
101386_1	101386	5392	2	14.1837	0.992835	0.189508	36242
101386_4	101386	5604	34	10.1936	0.992387	0.197451	8410
101386_5	101386	5422	22	57.3988	0.99597	0.176965	3016
101389_3	101389	2742	16	65.3472	0.99576	0.126969	5468
101391_0	101391	2647	9	14.9818	0.979988	0.135695	102926
101391_1	101391	2753	10	196.126	0.998787	0.139279	107901
101391_14	101391	2614	10	49.652	0.995149	0.137105	105061
101391_18	101391	2439	9	5.5746	0.950879	0.166283	88886
101391_5	101391	2691	24	26.6274	0.978169	0.149689	50535
101391_6	101391	2712	4	35.5358	0.995755	0.141951	20076
101391_7	101391	2512	8	6.74927	0.953911	0.168854	43597
101396_0	101396	4707	9	36.4353	0.999149	0.164635	122665
101396_3	101396	4314	5	18.1898	0.999149	0.16642	27710
101396_4	101396	4124	3	4.49749	0.971501	0.190341	11724
101396_5	101396	4337	7	6.32497	0.980859	0.173819	24547
101398_19	101398	2662	15	17.0102	1	0.120213	4196
101398_2	101398	2770	69	128.593	0.999439	0.123942	7959
101398_60	101398	2489	2	2.71713	0.961883	0.157292	8653
101399_0	101399	2880	32	63.0104	0.996419	0.123335	65616
101399_8	101399	2802	11	6.10863	0.982609	0.144853	62658
101400_1	101400	3283	2	17.6345	0.99811	0.147694	21002
101400_10	101400	3243	6	25.0701	0.999055	0.142609	1555
101400_16	101400	3348	4	5.47201	0.963138	0.196747	8232
101400_18	101400	3693	3	13.2168	0.996692	0.159667	2779
101400_4	101400	3278	8	44.0132	0.998582	0.162117	3041
101402_1	101402	3240	4	9.91527	0.992995	0.141292	56839
101402_15	101402	3493	2	8.20511	0.993579	0.158994	56977
101402_4	101402	3553	9	12.4447	0.99066	0.154705	3033
101402_7	101402	3082	1	3.00115	0.95505	0.18324	4125
101410_0	101410	3063	22	180.753	0.997732	0.188366	31923
101410_1	101410	3076	11	46.4128	0.995465	0.19244	30911
101410_12	101410	3302	4	21.2619	0.993197	0.191172	30878
101410_14	101410	3093	5	8.42445	0.962585	0.194658	31782
101410_15	101410	3264	8	49.6754	0.994331	0.192649	31777
101410_18	101410	3053	9	12.8797	0.975057	0.204143	30053
101410_19	101410	3233	10	116.973	0.997732	0.194605	31667
101410_2	101410	3118	19	491.713	0.998866	0.188033	31362
101410_20	101410	3126	12	74.1668	0.996599	0.187922	31779
101410_30	101410	3316	13	64.2832	0.995465	0.183927	32012
101410_31	101410	3047	14	45.3739	0.992063	0.186291	31868
101410_33	101410	2808	1	7.47569	0.97619	0.208203	31745
101410_34	101410	3065	10	28.8252	0.989796	0.191336	30826
101410_43	101410	3228	12	34.2491	0.993197	0.195854	31793
101410_54	101410	3082	14	24.7432	0.981859	0.192384	31768
101410_60	101410	3112	12	45.9427	0.994331	0.199966	31576
101410_74	101410	3055	19	34.2787	0.985261	0.195644	26176
101410_75	101410	3133	8	11.2659	0.970522	0.197314	31897
101410_8	101410	3016	5	9.26362	0.964853	0.202887	31904
101410_88	101410	3235	1	4.27242	0.952381	0.199431	28014
101410_9	101410	3437	18	453.912	0.998866	0.182588	11047
101413_0	101413	2050	5	3.8329	0.98	0.168441	109988
101413_2	101413	2007	1	1.68167	0.958	0.206304	84444
101415_1	101415	3465	52	91.1227	0.981054	0.19822	9414
101415_12	101415	3044	8	41.0327	0.956343	0.198448	9372
101415_7	101415	3308	22	47.7104	0.980231	0.19826	8927
101420_1	101420	2787	3	22.1276	0.958796	0.178104	38379
101421_3	101421	3042	45	11.5479	0.966091	0.105544	17180
101429_0	101429	3140	9	10.9888	0.966273	0.198648	61994
101429_1	101429	3138	24	26.5466	0.978921	0.187179	58998
101429_11	101429	3206	11	21.1811	0.989039	0.185673	61541
101429_12	101429	2953	11	8.29362	0.951096	0.200223	60862
101429_2	101429	3309	53	45.9373	0.98398	0.189687	58671
101429_26	101429	2942	13	9.26076	0.964587	0.189015	14153
101429_3	101429	3099	6	8.47784	0.963744	0.192887	55279
101429_9	101429	3034	14	14.4463	0.98145	0.186372	45407
101439_0	101439	2307	6	6.53668	0.98096	0.209182	41125
101439_1	101439	2245	4	6.2873	0.979305	0.161157	40361
101439_3	101439	2459	1	4.29715	0.978477	0.189739	14760
101439_4	101439	2275	2	8.47827	0.982616	0.162422	2933
101439_5	101439	2309	1	2.95399	0.961921	0.174236	5133
101440_0	101440	2841	41	596.248	0.9992	0.175316	13787
101440_2	101440	2701	13	175.235	0.9984	0.169457	13756
101440_3	101440	2522	15	139.208	0.9976	0.168631	13778
101440_54	101440	2526	6	63.5416	0.9928	0.171118	13500
101440_7	101440	2707	14	131.424	0.9976	0.177823	13772
101440_9	101440	2595	10	37.2549	0.9944	0.168993	12941
101444_10	101444	1942	1	5.72705	0.989305	0.157025	76015
101444_3	101444	1871	1	6.02569	0.991444	0.148539	43849
101444_4	101444	1998	1	12.803	0.997861	0.140465	4735
101444_5	101444	2046	12	10.2823	0.994652	0.160547	11076
101444_7	101444	1995	15	34.9624	0.99893	0.144569	20654
101456_10	101456	2405	21	10.1592	0.979221	0.156018	41549
101456_14	101456	2513	9	8.31654	0.980087	0.160921	4477
101456_15	101456	2350	8	6.03432	0.961905	0.169992	34665
101456_2	101456	2316	13	13.8412	0.981818	0.14662	3421
101456_3	101456	2445	10	7.32213	0.982684	0.152256	9825
101456_7	101456	2584	10	24.1675	0.995671	0.156977	7519
101456_8	101456	2449	2	9.61563	0.98961	0.15484	3914
101489_1	101489	4713	25	61.6303	0.988441	0.127338	155407
101489_2	101489	4702	24	93.7172	0.992543	0.124303	84784
101489_5	101489	4599	10	24.8506	0.979866	0.133225	44827
101489_6	101489	4829	19	75.0904	0.983594	0.128873	89002
101490_0	101490	2287	9	22.2016	0.986763	0.211961	12735
101490_10	101490	2050	5	7.56368	0.977136	0.195634	8944
101490_3	101490	2075	7	9.75838	0.981949	0.198603	5492
101493_0	101493	6067	16	958.697	0.998425	0.166276	43618
101493_11	101493	6290	5	11.2849	0.995668	0.172338	48132
101493_12	101493	6556	19	29.0852	0.998031	0.175292	15681
101493_126	101493	5723	1	3.9012	0.965341	0.190769	46417
101493_13	101493	6723	8	20.2335	0.997637	0.179665	43483
101493_14	101493	6250	3	13.6749	0.996849	0.178961	40279
101493_15	101493	6180	34	134.409	0.998818	0.169465	28358
101493_2	101493	6091	7	26.3589	0.998031	0.175613	20859
101493_24	101493	6277	6	24.2811	0.98976	0.177156	35103
101493_38	101493	6812	8	28.3258	0.998425	0.171793	2845
101493_44	101493	7057	5	17.2322	0.998031	0.179138	9915
101493_49	101493	6733	1	5.19734	0.965735	0.191099	4400
101493_55	101493	6368	4	6.90687	0.98976	0.185355	6240
101493_7	101493	6737	23	44.2168	0.998818	0.17509	8120
101494_1	101494	2572	6	14.3076	0.99828	0.146172	4972
101500_10	101500	3393	43	31.4403	0.991475	0.174919	23847
101500_11	101500	3245	11	12.395	0.97954	0.171999	23921
101500_13	101500	3268	15	14.7956	0.981245	0.174877	23514
101500_16	101500	3319	44	23.5497	0.982097	0.169222	23242
101500_3	101500	3371	35	21.2174	0.988917	0.16543	24339
101500_33	101500	3112	16	11.5202	0.976982	0.166151	2530
101500_5	101500	3274	4	9.11421	0.992327	0.170068	24187
101500_57	101500	3295	15	15.6489	0.98636	0.166559	2707
101500_6	101500	3302	12	13.4739	0.97954	0.184667	3668
101500_8	101500	3039	9	6.64521	0.959079	0.177789	2641
101531_14	101531	2866	21	21.7144	0.975945	0.175378	21729
101531_21	101531	2779	5	26.9744	0.978007	0.175294	3606
101531_28	101531	2804	6	13.1316	0.965636	0.176608	16084
101531_5	101531	3055	2	6.55239	0.96701	0.171989	4084
101531_7	101531	2882	3	77.117	0.997938	0.164544	3078
101556_3	101556	2756	4	5.44501	0.990249	0.173367	66958
101559_1	101559	1588	2	1.89735	0.966845	0.190143	15611
101565_0	101565	2329	34	22.0162	0.980985	0.184693	16209
101565_12	101565	2384	3	4.75093	0.959378	0.206596	1651
101565_18	101565	2252	8	8.61393	0.958513	0.185263	23378
101565_3	101565	2336	18	18.8453	0.976664	0.182208	12071
101565_4	101565	2340	13	24.5247	0.986171	0.186391	22315
101565_7	101565	2362	22	32.5877	0.983578	0.183155	10693
101565_9	101565	2341	13	13.9212	0.980985	0.189507	20809
101609_5	101609	2878	7	4.23109	0.985724	0.17984	50880
101627_19	101627	2744	9	10.4688	0.95935	0.184451	4161
101673_1	101673	2260	22	10.5108	0.9967	0.117517	5374
101687_15	101687	1915	13	5.71817	0.95207	0.151207	887
101687_3	101687	2160	3	25.1373	0.995643	0.116754	17223
101689_0	101689	4658	15	12.4534	0.995171	0.170563	96198
101695_2	101695	2471	11	15.884	0.997434	0.155658	83464
101695_3	101695	2384	11	83.2574	1	0.109639	55549
101695_7	101695	2329	23	42.5641	0.999145	0.125344	68766
101704_19	101704	2386	1	8.84026	0.990484	0.152057	58723
101704_2	101704	2569	5	68.5743	0.998414	0.145355	89102
101704_21	101704	2264	1	2.73295	0.969072	0.165975	10337
101704_3	101704	2419	4	8.39981	0.984933	0.165096	87592
101704_5	101704	2288	3	4.87487	0.975416	0.172048	50553
101704_8	101704	2532	6	19.1222	0.998414	0.163992	11506
101705_1	101705	3936	2	3.45396	0.956012	0.147984	88130
101711_2	101711	2153	13	37.2438	0.98668	0.180544	21698
101714_1	101714	2745	5	3.94184	0.976636	0.173379	75908
101714_2	101714	2891	35	14.3559	0.989097	0.171457	41695
101729_4	101729	2189	15	15.6663	0.998559	0.128136	3942
101737_0	101737	1808	14	207.151	1	0.144668	49825
101737_11	101737	1690	8	18.9475	0.98931	0.149789	49711
101737_2	101737	1826	20	86.6358	0.996113	0.150813	49601
101737_22	101737	1724	4	11.3276	0.984451	0.152605	49732
101737_27	101737	1801	10	64.9771	0.998056	0.147434	49493
101737_3	101737	1791	9	37.0897	0.995141	0.148902	5100
101737_4	101737	1822	64	318.056	1	0.152325	49512
101737_7	101737	1676	11	23.3892	0.987366	0.14776	49024
101756_0	101756	2653	17	34.9313	0.998936	0.148184	32081
101756_5	101756	2424	3	13.5098	0.995745	0.154524	31791
101756_7	101756	2476	8	25.8194	0.996809	0.156077	31737
101756_8	101756	2659	14	10.6709	0.981915	0.162444	31714
101770_0	101770	2867	12	1210.03	0.995876	0.176625	72084
101770_4	101770	2909	23	676.631	0.997938	0.176264	72009
101820_3	101820	2613	3	5.26822	0.979358	0.184457	8573
101820_5	101820	2796	20	17.9801	0.990061	0.164673	7092
101820_9	101820	2817	10	36.0568	0.997706	0.161765	22811
101830_0	101830	3477	15	74.9683	0.965087	0.193627	4833
101830_1	101830	3400	19	65.5722	0.958437	0.192193	6059
101830_10	101830	3528	9	98.1027	0.9867	0.18937	3884
101830_19	101830	3655	12	85.0867	0.978387	0.190255	1033
101830_23	101830	3383	7	59.0976	0.976725	0.188553	5732
101830_3	101830	3687	6	81.8055	0.989194	0.190074	6034
101830_30	101830	3602	12	49.2367	0.956775	0.193144	6251
101830_31	101830	3794	10	47.3663	0.96675	0.188682	6056
101830_4	101830	3935	24	174.001	0.988362	0.190149	2530
101830_43	101830	3809	11	41.537	0.958437	0.201603	5242
101830_45	101830	4188	11	33.5292	0.955112	0.213096	4240
101830_49	101830	3339	9	24.9802	0.951787	0.19302	5711
101830_5	101830	3603	24	161.749	0.990025	0.191015	6455
101830_55	101830	3735	18	29.7854	0.950125	0.199343	5901
101830_7	101830	3735	4	22.6371	0.963425	0.207718	5861
101830_70	101830	3723	6	31.8476	0.962594	0.199933	5863
101830_92	101830	3617	10	43.2152	0.970075	0.198469	2312
101831_0	101831	2443	1	5.04053	0.987333	0.140552	51377
101831_7	101831	2345	10	5.04004	0.966667	0.148268	25964
101848_0	101848	2128	8	8.10133	0.982918	0.147756	67804
101848_1	101848	2212	17	30.799	0.999288	0.134013	68810
101848_14	101848	1986	5	2.5491	0.958719	0.170408	67942
101848_21	101848	2128	8	6.46329	0.981495	0.147671	25737
101848_3	101848	2151	22	28.8106	0.997153	0.135529	55762
101848_42	101848	2165	8	11.9317	0.995018	0.143563	7624
101848_5	101848	2115	11	8.74683	0.987189	0.146155	68246
101866_2	101866	2953	24	257.742	0.998053	0.216326	84050
101866_20	101866	2936	12	117.214	0.996105	0.219204	84122
101866_3	101866	2795	10	346.67	1	0.199112	84606
101866_31	101866	2830	19	57.5255	0.983447	0.216299	82414
101866_4	101866	2920	13	384.878	0.999026	0.198611	72642
101887_2	101887	2425	3	173.565	0.990144	0.152836	83466
101937_0	101937	1948	20	1359.2	0.980296	0.144572	69124
101985_0	101985	1710	15	45.6792	0.988434	0.13988	40757
101985_10	101985	1745	11	16.3679	0.99911	0.143379	49990
102007_0	102007	2647	11	490.526	0.994749	0.180389	26918
102016_0	102016	2276	5	5.55793	0.98937	0.161523	67123
102021_0	102021	2384	5	19.0421	0.991107	0.194444	31483
102021_1	102021	2448	4	24.5035	0.995059	0.191717	30132
102040_0	102040	2992	21	35.939	0.995244	0.193437	40138
102040_13	102040	2815	19	23.5075	0.996433	0.203436	40508
102040_15	102040	2668	5	27.3367	0.996433	0.187331	41100
102040_18	102040	2594	1	12.3341	0.995244	0.183331	38982
102040_2	102040	2666	4	54.337	0.997622	0.183887	40869
102040_21	102040	2630	8	17.1605	0.988109	0.19135	41762
102040_22	102040	3058	9	14.6468	0.991677	0.227435	28722
102040_24	102040	2574	21	95.5945	0.998811	0.186644	39084
102040_25	102040	2877	10	22.1268	0.995244	0.194524	2494
102040_26	102040	2761	9	75.1019	1	0.186907	3526
102040_33	102040	2776	13	75.0625	0.997622	0.187902	40313
102040_37	102040	2648	7	5.94713	0.953627	0.205706	40368
102040_4	102040	2737	10	65.5972	0.998811	0.1904	39657
102040_40	102040	2559	2	16.4929	0.989298	0.1868	2335
102040_46	102040	3040	5	12.4694	0.992866	0.198855	38644
102040_47	102040	2784	1	18.4519	0.997622	0.193709	12029
102040_48	102040	2761	8	6.64357	0.957194	0.20807	31355
102040_51	102040	2804	7	10.8483	0.972652	0.201381	37186
102040_58	102040	3114	8	10.1526	0.994055	0.228949	3013
102040_6	102040	2759	14	117.353	0.998811	0.188645	35214
102040_7	102040	2880	10	86.8207	1	0.186953	5347
102040_8	102040	2851	9	68.4335	1	0.185882	9679
102040_9	102040	2817	10	84.304	0.998811	0.189992	3730
102040_91	102040	2469	1	3.6505	0.951249	0.195123	2365
102057_0	102057	3467	6	41.027	0.997199	0.198878	26059
102057_10	102057	3540	19	50.2424	0.997199	0.184964	27778
102057_11	102057	3183	21	49.6754	0.997199	0.188027	27528
102057_12	102057	3011	4	30.2306	1	0.196061	27533
102057_2	102057	3551	13	125.414	1	0.190429	30220
102057_24	102057	3309	8	19.638	0.997199	0.191032	27925
102057_26	102057	3663	9	24.7768	0.997199	0.193826	21788
102057_28	102057	3265	9	41.9426	0.997199	0.197126	21148
102057_37	102057	3415	4	27.9261	0.997199	0.193896	27654
102057_40	102057	2949	5	9.257	0.990196	0.196188	4027
102057_46	102057	2919	1	3.22006	0.963585	0.197617	8161
102057_5	102057	3537	47	86.4623	0.998599	0.20349	25625
102057_53	102057	2839	1	2.99715	0.957983	0.210232	3935
102057_6	102057	3515	19	30.3822	0.991597	0.20154	20033
102057_61	102057	3397	13	35.1444	0.997199	0.239062	5981
102057_7	102057	3585	41	161.151	0.998599	0.190656	25914
102057_82	102057	3022	6	5.58568	0.956583	0.224397	24175
102057_9	102057	3419	3	58.6713	1	0.186953	1675
102060_11	102060	3418	15	12.5835	0.984962	0.219459	61921
102060_12	102060	2743	12	9.03097	0.966583	0.194008	61384
102060_16	102060	2910	13	8.15252	0.955723	0.209122	16949
102060_19	102060	3008	11	10.5377	0.966583	0.19424	12154
102060_2	102060	2695	7	8.81385	0.974102	0.190101	61184
102060_23	102060	2712	12	8.79951	0.962406	0.210307	50999
102060_3	102060	2874	7	28.136	0.994152	0.189913	48287
102060_4	102060	2843	22	32.2986	0.992481	0.18875	6623
102060_7	102060	2843	8	10.0133	0.981621	0.188072	7274
102072_2	102072	3252	14	5.48329	0.954365	0.207078	126588
102072_36	102072	3320	11	5.65453	0.974206	0.196978	88270
102072_4	102072	3355	6	7.13689	0.996032	0.202683	21976
102072_8	102072	3290	13	29.5582	0.998016	0.180916	15295
102072_9	102072	3169	4	3.72352	0.959325	0.198249	15262
102082_0	102082	2461	11	1504.23	0.999024	0.162472	77385
102101_0	102101	2873	3	26.4818	0.993983	0.179908	92680
102101_3	102101	3011	4	9.23463	0.978339	0.188655	92839
102135_10	102135	2302	7	5.11506	0.977273	0.155166	49699
102135_13	102135	2286	7	6.39345	0.988292	0.16203	17086
102135_16	102135	2256	2	4.66403	0.984848	0.143936	11700
102135_2	102135	2406	15	34.411	0.998623	0.128623	38521
102135_23	102135	2335	13	15.05	0.995179	0.134647	23799
102143_0	102143	2249	8	8.38167	0.984157	0.174522	69092
102143_2	102143	2280	12	11.835	0.972973	0.181981	38097
102152_0	102152	2938	2	53.2234	0.996606	0.168051	44068
102152_1	102152	2598	4	3.6723	0.956551	0.186161	41603
102152_2	102152	2669	13	9.37553	0.980991	0.171705	32009
102152_26	102152	2842	2	16.9233	0.999321	0.171528	11687
102152_4	102152	2828	22	110.786	0.997284	0.1642	24633
102155_0	102155	2703	10	6.31932	0.968495	0.19561	34176
102155_1	102155	2718	10	8.01625	0.98133	0.173274	34723
102155_3	102155	2689	15	14.0455	0.990665	0.173915	3031
102155_32	102155	2660	23	14.0187	0.982497	0.167027	5604
102155_4	102155	2739	4	6.0735	0.976663	0.186184	2895
102155_5	102155	2795	5	6.4686	0.992999	0.183016	1996
102160_2	102160	1734	17	22.1283	0.999136	0.0968839	15649
102160_4	102160	1713	17	7.84008	0.986171	0.122069	15488
102160_5	102160	1661	10	50.9401	0.990493	0.0913156	2525
102163_0	102163	1770	10	17.7126	0.983141	0.181465	15851
102163_2	102163	1705	18	132.457	0.993789	0.1859	14399
102163_20	102163	1702	8	6.81472	0.960071	0.196597	1394
102191_0	102191	1420	7	8.59154	0.988069	0.167317	13174
102191_1	102191	1527	19	50.8199	0.996746	0.156343	13591
102191_2	102191	1484	10	250.987	0.998915	0.144011	11686
102191_26	102191	1516	13	27.3001	0.993492	0.160102	4577
102191_28	102191	1526	8	11.3924	0.991323	0.152756	2797
102191_4	102191	1420	4	4.27252	0.97397	0.174645	13400
102194_1	102194	2416	10	244.71	1	0.10637	29066
102194_9	102194	2353	3	4.40235	0.994662	0.157963	27115
102218_0	102218	2752	9	62.5604	0.989086	0.118329	128964
102218_2	102218	2657	7	36.6766	0.984993	0.111525	129806
102224_0	102224	2244	13	25.6162	0.957317	0.161505	49000
102267_0	102267	4899	6	7.11595	0.993472	0.118123	37480
102267_1	102267	5925	15	14.8942	0.999749	0.116796	38089
102270_5	102270	4046	1	5.31639	0.998106	0.150896	75844
102272_0	102272	3778	12	260.429	0.996973	0.193201	2132
102272_1	102272	3343	9	444.196	0.995964	0.191026	2322
102272_101	102272	3328	5	50.3928	0.993946	0.190092	1970
102272_102	102272	3339	2	49.237	0.995964	0.189725	2388
102272_109	102272	3566	4	48.428	0.995964	0.192411	2348
102272_11	102272	4412	3	4.69715	0.970737	0.232081	2353
102272_111	102272	3713	7	32.1942	0.992936	0.194962	2325
102272_114	102272	3980	12	139.375	0.993946	0.203268	1856
102272_115	102272	3537	5	233.556	0.996973	0.213667	2239
102272_118	102272	4553	3	7.10736	0.980827	0.230052	1919
102272_120	102272	3720	7	88.5478	0.996973	0.186919	235
102272_122	102272	3515	1	27.9438	0.993946	0.188713	2178
102272_124	102272	3792	5	14.068	0.989909	0.20534	2398
102272_125	102272	3452	5	31.208	0.995964	0.194945	2319
102272_128	102272	3468	2	15.8481	0.994955	0.222228	2108
102272_13	102272	3359	8	99.6677	0.995964	0.190974	2004
102272_132	102272	3962	1	13.0041	0.991927	0.204996	1992
102272_139	102272	3468	1	20.7767	0.993946	0.193211	2098
102272_143	102272	4697	5	43.7506	0.995964	0.220756	2009
102272_145	102272	3763	4	9.6331	0.989909	0.20259	2158
102272_152	102272	3303	4	20.6776	0.991927	0.189808	2064
102272_166	102272	3910	1	10.9235	0.993946	0.201029	1920
102272_170	102272	3279	1	13.7992	0.9889	0.191129	1923
102272_173	102272	3660	5	48.1777	0.991927	0.191104	2264
102272_176	102272	3354	7	217.941	0.995964	0.186565	2201
102272_177	102272	3223	5	30.3135	0.9889	0.191859	2126
102272_18	102272	3705	2	5.28613	0.976791	0.200217	2244
102272_2	102272	3167	9	124.904	0.993946	0.187498	1997
102272_20	102272	3960	3	43.1951	0.996973	0.199709	2045
102272_21	102272	3483	8	82.7103	0.993946	0.199359	2130
102272_22	102272	3257	5	376.758	0.995964	0.186845	1971
102272_23	102272	3202	4	170.656	0.993946	0.185561	2280
102272_25	102272	3804	1	12.7589	0.993946	0.198302	2074
102272_26	102272	3349	11	527.295	0.996973	0.211276	2128
102272_27	102272	3205	11	129.728	0.994955	0.187254	1951
102272_29	102272	4547	6	30.7926	0.995964	0.219834	2249
102272_3	102272	3280	11	415.646	0.996973	0.185046	1998
102272_31	102272	4335	5	18.1133	0.994955	0.206635	2112
[truncated: 1,512 more rows]

## Sheet: README
Supplemental Table S1: Details about all inferred strains in HMP2. Includes columns representing: the number of genes in estimate gene content, number of samples included as strain-pure, total species depth across strain pure samples, the fraction of species marker genes in the estimated gene content, the log of the standard deviation of gene depth ratio, and the number of unmasked, genotyped pos…
