# Supplementary material for: Accurate estimation of intraspecific microbial gene content variation in metagenomic data with MIDAS v3 and StrainPGC
Source: HighWire-hosted journal article supplement (doi:10.1101/gr.279543.124), 2025-04-10
Supplement: Supplemental_Table_S3.xlsx [file Supplemental_Table_S3.xlsx]

## Sheet: Table S3
centroid_75	nlength	Description	Preferred_name	6_gene_present	9_gene_present	eggnog_og	gene_clust	amr_hit	cog_category	6_clust_frac	9_clust_frac
GUT_GENOME000026_00162	236.971	Protein of unknown function (DUF1656)	ydhI	TRUE	TRUE	3XQ01@561|Escherichia,1NCAP@1224|Proteobacteria,32YWB@2|Bacteria,2E3ZD@1|root,1SD9Z@1236|Gammaproteobacteria
GUT_GENOME000026_00183	1232.19	cellular response to DNA damage stimulus	ydhQ	TRUE	TRUE	COG3468@1|root,COG3468@2|Bacteria,3XNU0@561|Escherichia,1NQVP@1224|Proteobacteria,1SMRB@1236|Gammaproteobacteria			M,U
GUT_GENOME000026_00233	2162.9	phenylalanine-tRNA ligase activity	pheT	TRUE	TRUE	COG0072@1|root,COG0073@2|Bacteria,COG0073@1|root,COG0072@2|Bacteria,1RMIH@1236|Gammaproteobacteria,1MWKS@1224|Proteobacteria,3XMDP@561|Escherichia			J
GUT_GENOME000026_00238	1833.26	Catalyzes the attachment of threonine to tRNA(Thr) in a two-step reaction L-threonine is first activated by ATP to form Thr-AMP and then transferred to the acceptor end of tRNA(Thr)	thrS	TRUE	TRUE	COG0441@1|root,1MUP2@1224|Proteobacteria,COG0441@2|Bacteria,1RMYE@1236|Gammaproteobacteria,3XNZY@561|Escherichia	1995		J	1	1
GUT_GENOME000026_00246	664.295	this is a biologically important activity in vivo since it contributes to the elimination of this toxic compound and plays an important role in the resistance of E.coli to 2-deoxyglucose	yniC	TRUE	TRUE	COG0637@2|Bacteria,1RNP8@1236|Gammaproteobacteria,1NF90@1224|Proteobacteria,3XMXW@561|Escherichia,COG0637@1|root			G
GUT_GENOME000026_00337	786.773	Transcriptional regulator	kdgR	TRUE	TRUE	COG1414@2|Bacteria,1RR06@1236|Gammaproteobacteria,COG1414@1|root,1MUNW@1224|Proteobacteria,3XP0S@561|Escherichia			K
GUT_GENOME000026_00393	388.794	Involved in the transmission of sensory signals from the chemoreceptors to the flagellar motors. In its active (phosphorylated or acetylated) form, CheY exhibits enhanced binding to a switch component, FliM, at the flagellar motor which induces a change from counterclockwise to clockwise flagellar rotation	cheY	TRUE	TRUE	1RDNP@1224|Proteobacteria,COG0745@2|Bacteria,COG0745@1|root,1S47I@1236|Gammaproteobacteria,3XPJY@561|Escherichia			K,T
GUT_GENOME000026_00405	1359.12	Probably involved in the osmoprotection via the biosynthesis of trehalose. Catalyzes the transfer of glucose from UDP-glucose (UDP-Glc) to D-glucose 6-phosphate (Glc-6-P) to form trehalose-6-phosphate. Acts with retention of the anomeric configuration of the UDP-sugar donor	otsA	TRUE	TRUE	1MUIY@1224|Proteobacteria,1RNG7@1236|Gammaproteobacteria,3XPDP@561|Escherichia,COG0380@1|root,COG0380@2|Bacteria			G
GUT_GENOME000026_00561	284.532	BMC domain	pduA	FALSE	TRUE	COG4577@1|root,1RH1U@1224|Proteobacteria,COG4577@2|Bacteria,1S5Y6@1236|Gammaproteobacteria,3WYJR@544|Citrobacter	351		C,Q	0	1
GUT_GENOME000026_00568	275.78	BMC domain	pduA_1	FALSE	TRUE	1S6YV@1236|Gammaproteobacteria,1RH1U@1224|Proteobacteria,COG4577@2|Bacteria,COG4577@1|root,3XR42@561|Escherichia	351		C,Q	0	1
GUT_GENOME000026_00569	422.803	BMC	pduK	FALSE	TRUE	COG4577@1|root,3XQYE@561|Escherichia,1S594@1236|Gammaproteobacteria,COG4577@2|Bacteria,1RERH@1224|Proteobacteria	351		C,Q	0	1
GUT_GENOME000026_00574	1258.67	Aldehyde dehydrogenase family	pduP	FALSE	TRUE	1RP7H@1236|Gammaproteobacteria,1QUBI@1224|Proteobacteria,3XMCR@561|Escherichia,COG1012@1|root,COG1012@2|Bacteria	352		C,I	0	1
GUT_GENOME000026_00578	350.71	BMC	pduU	FALSE	TRUE	COG4810@2|Bacteria,COG4810@1|root,3XQXW@561|Escherichia,1RIS3@1224|Proteobacteria,1S458@1236|Gammaproteobacteria	351		E	0	1
GUT_GENOME000026_00579	443.713	Ethanolamine utilisation - propanediol utilisation	pduV	FALSE	TRUE	COG4917@1|root,COG4917@2|Bacteria,3XQ3H@561|Escherichia,1S3XX@1236|Gammaproteobacteria,1RIVR@1224|Proteobacteria	2410		E	0	1
GUT_GENOME000026_00661	433.525	Phosphoenolpyruvate-dependent sugar phosphotransferase system	gatA	TRUE	TRUE	COG1762@2|Bacteria,COG1762@1|root,1S5QX@1236|Gammaproteobacteria,1RDXB@1224|Proteobacteria	286		G,T	1	1
GUT_GENOME000026_00721	1428.53	Lysine-specific permease	lysP	TRUE	TRUE	1QTSM@1224|Proteobacteria,COG0833@1|root,COG0833@2|Bacteria,3XP8G@561|Escherichia,1RNI2@1236|Gammaproteobacteria			E
GUT_GENOME000026_00741	1498.51	cyclic-guanylate-specific phosphodiesterase activity	rtn	TRUE	TRUE	3XM4Z@561|Escherichia,COG2200@2|Bacteria,COG2200@1|root,1NJQD@1224|Proteobacteria,1RNEP@1236|Gammaproteobacteria			T
GUT_GENOME000026_00776	1586.86	malate dehydrogenase (menaquinone) activity	mqo	TRUE	TRUE	COG0579@2|Bacteria,1RRBV@1236|Gammaproteobacteria,COG0579@1|root,3XPAI@561|Escherichia,1MUCC@1224|Proteobacteria			C,G
GUT_GENOME000026_00827	949.656	Converts 2-succinyl-6-hydroxy-2,4-cyclohexadiene-1- carboxylate (SHCHC) to 2-succinylbenzoate (OSB)	menC	TRUE	TRUE	1MV33@1224|Proteobacteria,1RRC0@1236|Gammaproteobacteria,COG1441@1|root,COG1441@2|Bacteria,3XNDA@561|Escherichia			H
GUT_GENOME000026_00846	1285.75	NDH-1 shuttles electrons from NADH, via FMN and iron- sulfur (Fe-S) centers, to quinones in the respiratory chain	nuoF	TRUE	TRUE	1MV8F@1224|Proteobacteria,COG1894@1|root,COG1894@2|Bacteria,1RMUD@1236|Gammaproteobacteria,3XNXF@561|Escherichia			C
GUT_GENOME000026_00863	550.421	Shows phosphodiesterase activity, hydrolyzing phosphodiesters bonds in the artificial chromogenic substrates bis-p-nitrophenyl phosphate (bis-pNPP), and less efficiently thymidine 5'-monophosphate p-nitrophenyl ester (pNP-TMP) and p- nitrophenylphosphorylcholine (pNPPC). The physiological substrate is	yfcE	TRUE	TRUE	COG0622@2|Bacteria,1RY3X@1236|Gammaproteobacteria,COG0622@1|root,1R3Y7@1224|Proteobacteria,3XMZI@561|Escherichia			R
GUT_GENOME000026_00897	476.526	Part of the yfcOPQRSUV fimbrial operon. Could contribute to adhesion to various surfaces in specific environmental niches. Increases adhesion to eukaryotic T24 bladder epithelial cells in the absence of fim genes	yfcQ	TRUE	FALSE	COG3539@2|Bacteria,3XQ2E@561|Escherichia,COG3539@1|root,1REAV@1224|Proteobacteria,1S7WR@1236|Gammaproteobacteria	925		N,U	0.75	0.25
GUT_GENOME000026_00937	1207.91	H( )-stimulated, divalent metal cation uptake system	mntH	TRUE	TRUE	1RNA2@1236|Gammaproteobacteria,3XMY0@561|Escherichia,COG1914@1|root,1MW6X@1224|Proteobacteria,COG1914@2|Bacteria			P
GUT_GENOME000026_01018	358.89	oxidoreductase activity, acting on phosphorus or arsenic in donors, disulfide as acceptor	arsC	TRUE	TRUE	COG1393@2|Bacteria,COG1393@1|root,3XPP4@561|Escherichia,1S8XH@1236|Gammaproteobacteria,1MZ4Z@1224|Proteobacteria			P
GUT_GENOME000026_01037	216	zinc-ribbons	yfgJ	TRUE	TRUE	1N9D9@1224|Proteobacteria,1SCH3@1236|Gammaproteobacteria,COG1645@2|Bacteria,COG1645@1|root,3XQ32@561|Escherichia	942		R	1	0.5
GUT_GENOME000026_01040	617.853	Tetratricopeptide repeat-like domain	yfgM	TRUE	TRUE	COG2976@2|Bacteria,COG2976@1|root,1N117@1224|Proteobacteria,1S95P@1236|Gammaproteobacteria,3XMCB@561|Escherichia			T
GUT_GENOME000026_01052	335.943	that it has a role as a cellular electron transfer protein. Involved in the in vivo assembly of the Fe-S clusters in a wide variety of iron- sulfur proteins	fdx	TRUE	TRUE	1RHDC@1224|Proteobacteria,COG0633@2|Bacteria,1S5XW@1236|Gammaproteobacteria,COG0633@1|root,3XPTK@561|Escherichia			C
GUT_GENOME000026_01128	272.998	Histone-like DNA-binding protein which is capable of wrapping DNA to stabilize it, and thus to prevent its denaturation under extreme environmental conditions	hupA	TRUE	FALSE	1S8VH@1236|Gammaproteobacteria,1MZ5B@1224|Proteobacteria,COG0776@1|root,COG0776@2|Bacteria,3XPW4@561|Escherichia			L
GUT_GENOME000026_01129	589.535	Protein of unknown function (DUF416)	yjaG	TRUE	TRUE	COG3068@2|Bacteria,COG3068@1|root,1RQDG@1236|Gammaproteobacteria,1MWSN@1224|Proteobacteria,3XPD1@561|Escherichia
GUT_GENOME000026_01144	703.308	Binds directly to 23S rRNA. The L1 stalk is quite mobile in the ribosome, and is involved in E site tRNA release	rplA	TRUE	TRUE	COG0081@2|Bacteria,COG0081@1|root,1RMDW@1236|Gammaproteobacteria,1MUE6@1224|Proteobacteria,3XMSJ@561|Escherichia			J
GUT_GENOME000026_01145	428.426			TRUE	TRUE	1NVM8@1224|Proteobacteria,2EDVM@1|root,337QR@2|Bacteria
GUT_GENOME000026_01161	1194.42	ImpA domain protein		FALSE	TRUE	1RQNJ@1236|Gammaproteobacteria,COG3515@2|Bacteria,COG3515@1|root,1Q02U@1224|Proteobacteria	861		M,U	0	0.933333
GUT_GENOME000026_01168	522.994	protein conserved in bacteria	vasD	FALSE	TRUE	1MX5E@1224|Proteobacteria,COG3521@2|Bacteria,COG3521@1|root,1S83T@1236|Gammaproteobacteria	861		U	0	0.933333
GUT_GENOME000026_01170	1028.89	Type VI secretion, TssG	impH2	FALSE	TRUE	COG3520@2|Bacteria,COG3520@1|root,3XR7F@561|Escherichia,1RRTG@1236|Gammaproteobacteria,1MWVS@1224|Proteobacteria	861		U	0	0.933333
GUT_GENOME000026_01172	425.956	type VI secretion system lysozyme-related protein		FALSE	TRUE	1RE8H@1224|Proteobacteria,1S45J@1236|Gammaproteobacteria,COG3518@1|root,COG3518@2|Bacteria	861		U	0	0.933333
GUT_GENOME000026_01173	1415.72	type VI secretion protein	impC	FALSE	TRUE	COG3517@1|root,1MU5C@1224|Proteobacteria,1RNP7@1236|Gammaproteobacteria,COG3517@2|Bacteria	861		U	0	0.933333
GUT_GENOME000026_01184	485.462			FALSE	TRUE	1RHBR@1224|Proteobacteria,1S6R5@1236|Gammaproteobacteria,2F6XC@1|root,329C9@2|Bacteria	861			0	0.933333
GUT_GENOME000026_01202	832.219	Type III flagellar switch regulator (C-ring) FliN C-term	fliM	TRUE	TRUE	3XQAT@561|Escherichia,COG1868@2|Bacteria,COG1868@1|root,1RQYR@1236|Gammaproteobacteria,1R6AH@1224|Proteobacteria	2397		N	0.970588	1
GUT_GENOME000026_01203	966.119	Bacterial regulatory protein, Fis family	lafK	TRUE	TRUE	1MU0N@1224|Proteobacteria,1RMCK@1236|Gammaproteobacteria,3XQ8N@561|Escherichia,COG2204@2|Bacteria,COG2204@1|root	2397		K,T	0.970588	1
GUT_GENOME000026_01204	341.707	Flagellar hook-basal body complex protein FliE	fliE	TRUE	TRUE	COG1677@2|Bacteria,COG1677@1|root,3XR6Y@561|Escherichia,1N6TP@1224|Proteobacteria,1SCK1@1236|Gammaproteobacteria	2397		N	0.970588	1
GUT_GENOME000026_01221	1177.81	Flagellar basal body protein FlaE	flgE	TRUE	TRUE	1RMWX@1236|Gammaproteobacteria,3XQPX@561|Escherichia,COG1749@1|root,COG1749@2|Bacteria,1MU5J@1224|Proteobacteria	2397		N	0.970588	1
GUT_GENOME000026_01222	732.306	Flagellar basal body rod FlgEFG protein C-terminal		TRUE	TRUE	COG4787@2|Bacteria,3XQHH@561|Escherichia,1RXAB@1236|Gammaproteobacteria,1NZWQ@1224|Proteobacteria,COG4787@1|root	2397		N	0.970588	1
GUT_GENOME000026_01225	1080.4	Assembles around the rod to form the L-ring and probably protects the motor basal body from shearing forces during rotation	flgI	TRUE	TRUE	1MVKW@1224|Proteobacteria,COG1706@2|Bacteria,1RMRB@1236|Gammaproteobacteria,3XQ9H@561|Escherichia,COG1706@1|root	2397		N	0.970588	1
GUT_GENOME000026_01226	299.742	Rod binding protein		TRUE	TRUE	3XR74@561|Escherichia,COG3951@2|Bacteria,1TAEI@1236|Gammaproteobacteria,1PG3B@1224|Proteobacteria,COG3951@1|root	2398		M,N,O	1	1
GUT_GENOME000026_01229	957.819			TRUE	TRUE	3XQYX@561|Escherichia,302U0@2|Bacteria,2CH1M@1|root,1S4AK@1236|Gammaproteobacteria,1RFS8@1224|Proteobacteria	2397			0.970588	1
GUT_GENOME000026_01236	465.352	Controls the rotational direction of flagella during chemotaxis		TRUE	TRUE	1SAXY@1236|Gammaproteobacteria,3XR78@561|Escherichia,COG1580@1|root,1N0SZ@1224|Proteobacteria,COG1580@2|Bacteria	2397		N	0.970588	1
GUT_GENOME000026_01237	713.18	Sigma-70 region 2		TRUE	TRUE	1MWEU@1224|Proteobacteria,1RMKJ@1236|Gammaproteobacteria,3XQN2@561|Escherichia,COG1191@1|root,COG1191@2|Bacteria	2397		K	0.970588	1
GUT_GENOME000026_01265	264			TRUE	FALSE		1726			0.875	0
GUT_GENOME000026_01267	598.112			TRUE	FALSE	2BX90@1|root,1SG1Y@1236|Gammaproteobacteria,331VI@2|Bacteria,1NBC2@1224|Proteobacteria	1726			0.875	0
GUT_GENOME000026_01268	341.293			TRUE	FALSE	1N3XI@1224|Proteobacteria,1SAHS@1236|Gammaproteobacteria,2BX90@1|root,32TMX@2|Bacteria	1733			0.777778	0
GUT_GENOME000026_01269	371.758			TRUE	FALSE		1733			0.777778	0
GUT_GENOME000026_01270	2536.12	Domain of unknown function (DUF927)	Z012_01240	TRUE	FALSE	COG5519@2|Bacteria,COG5519@1|root,COG4643@2|Bacteria,COG4643@1|root,1MW5H@1224|Proteobacteria,1RQ7H@1236|Gammaproteobacteria,3XNIB@561|Escherichia	1733		L,R,X	0.777778	0
GUT_GENOME000026_01273	672.777	viral entry into host cell		TRUE	FALSE	4QCS6@10239|Viruses	1733			0.777778	0
GUT_GENOME000026_01297	1102.92	Oxidoreductase		TRUE	TRUE	1MVIX@1224|Proteobacteria,COG1902@2|Bacteria,3XPYB@561|Escherichia,COG1902@1|root,1T1RB@1236|Gammaproteobacteria	1037		C	1	1
GUT_GENOME000026_01301	970.751	Aldo/keto reductase family		TRUE	TRUE	COG0667@2|Bacteria,COG0667@1|root,1RPX5@1236|Gammaproteobacteria,1MVEH@1224|Proteobacteria,3XNVY@561|Escherichia	1035		C,H,R	1	1
GUT_GENOME000026_01302	824.607	Aldo/keto reductase family	aRA11	TRUE	TRUE	COG0656@1|root,1RRAV@1236|Gammaproteobacteria,COG0656@2|Bacteria,1MWFS@1224|Proteobacteria,3XQCN@561|Escherichia	1035		Q	1	1
GUT_GENOME000026_01304	834.989	Bacterial transcription activator, effector binding domain	ykgA	TRUE	TRUE	COG2207@2|Bacteria,1S84A@1236|Gammaproteobacteria,1RIE3@1224|Proteobacteria,COG2207@1|root,COG3708@1|root,COG3708@2|Bacteria,3XRJH@561|Escherichia	178		K	1	1
GUT_GENOME000026_01325	491.405	Protein of unknown function (DUF1097)	yahC	FALSE	TRUE	2DC16@1|root,1RA3H@1224|Proteobacteria,1S33K@1236|Gammaproteobacteria,2ZCC8@2|Bacteria,3XMM2@561|Escherichia
GUT_GENOME000026_01444	469.667	Inner membrane protein YlaC	ylaC	TRUE	TRUE	2CEAX@1|root,3XPGN@561|Escherichia,328KF@2|Bacteria,1RIZ1@1224|Proteobacteria,1S7K3@1236|Gammaproteobacteria
GUT_GENOME000026_01474	1269.64	transport protein	ybaT	TRUE	TRUE	1QVWZ@1224|Proteobacteria,1T2MA@1236|Gammaproteobacteria,COG0531@1|root,COG0531@2|Bacteria,3XPI4@561|Escherichia			E
GUT_GENOME000026_01524	332.209	Part of a cation efflux system that mediates resistance to copper and silver. Binds one copper per polypeptide	cusF	TRUE	TRUE	COG5569@1|root,COG5569@2|Bacteria,1N4KG@1224|Proteobacteria,1S9YP@1236|Gammaproteobacteria,3XQZW@561|Escherichia			P
GUT_GENOME000026_01582	639.593	Catalyzes the transfer of endogenously produced octanoic acid from octanoyl-acyl-carrier-protein onto the lipoyl domains of lipoate-dependent enzymes. Lipoyl-ACP can also act as a substrate although octanoyl-ACP is likely to be the physiological substrate	lipB	TRUE	TRUE	1MU6A@1224|Proteobacteria,COG0321@1|root,COG0321@2|Bacteria,1RMXQ@1236|Gammaproteobacteria,3XM74@561|Escherichia			H
GUT_GENOME000026_01616	795.253	Catalyzes the reversible isomerization-deamination of glucosamine 6-phosphate (GlcN6P) to form fructose 6-phosphate (Fru6P) and ammonium ion	nagB	TRUE	TRUE	1MVEA@1224|Proteobacteria,1RQ2V@1236|Gammaproteobacteria,COG0363@1|root,COG0363@2|Bacteria,3XNCZ@561|Escherichia			F,G
GUT_GENOME000026_01631	528.502	Low-potential electron donor to a number of redox enzymes	fldA	TRUE	TRUE	COG0716@2|Bacteria,1RMNT@1236|Gammaproteobacteria,1MX7F@1224|Proteobacteria,COG0716@1|root,3XMN6@561|Escherichia			C
GUT_GENOME000026_01632	362.673	regulation of nucleic acid-templated transcription	ybfE	TRUE	TRUE	2DB8J@1|root,32TX0@2|Bacteria,1MZBR@1224|Proteobacteria,1S9W6@1236|Gammaproteobacteria
GUT_GENOME000026_01665	1504.99	A terminal oxidase that produces a proton motive force by the vectorial transfer of protons across the inner membrane. It is the component of the aerobic respiratory chain of E.coli that predominates when cells are grown at low aeration. Generates a proton motive force using protons and electrons from opposite sides of the membrane to generate H(2)O, transferring 1 proton electron	cydA	TRUE	TRUE	COG1271@2|Bacteria,1MV60@1224|Proteobacteria,1RN2U@1236|Gammaproteobacteria,COG1271@1|root,3XNDG@561|Escherichia			C
GUT_GENOME000026_01694	770.438	Molybdate-binding periplasmic	modA	TRUE	TRUE	COG0725@2|Bacteria,COG0725@1|root,1RN71@1236|Gammaproteobacteria,1MVNA@1224|Proteobacteria,3XP51@561|Escherichia			P
GUT_GENOME000026_01695	686.447	Molybdenum transport system permease protein ModB	modB	TRUE	TRUE	1MUXR@1224|Proteobacteria,1RRDV@1236|Gammaproteobacteria,COG4149@1|root,COG4149@2|Bacteria,3XMCK@561|Escherichia			P
GUT_GENOME000026_01745	514.017	Outer membrane protein X	ompX	TRUE	TRUE	1S1ZI@1236|Gammaproteobacteria,COG3637@2|Bacteria,1RAHA@1224|Proteobacteria,COG3637@1|root,3XPDG@561|Escherichia			M
GUT_GENOME000026_01757	1214.3	Molybdopterin	moeA	TRUE	TRUE	1RMQU@1236|Gammaproteobacteria,3XN1A@561|Escherichia,COG0303@1|root,COG0303@2|Bacteria,1MVD5@1224|Proteobacteria			H
GUT_GENOME000026_01758	932.173	Degrades proteins damaged by L-isoaspartyl residue formation (also known as beta-Asp residues). Degrades L- isoaspartyl-containing di- and maybe also tripeptides. Also has L- asparaginase activity, although this may not be its principal function	iaaA	TRUE	TRUE	1MWFC@1224|Proteobacteria,COG1446@2|Bacteria,COG1446@1|root,1RNUR@1236|Gammaproteobacteria,3XPAN@561|Escherichia			E
GUT_GENOME000026_01811	897.186	Baseplate J-like protein		TRUE	FALSE	COG3948@2|Bacteria,COG3948@1|root,1RNBJ@1236|Gammaproteobacteria,1MUFF@1224|Proteobacteria,3XQVU@561|Escherichia	1857		X	0.904762	0
GUT_GENOME000026_01827	892.696	Is an L-glutamate ligase that catalyzes the ATP- dependent post-translational addition of glutamate residues to the C-terminus of ribosomal protein S6 (RpsF). Is also able to catalyze the synthesis of poly-alpha-glutamate in vitro, via ATP hydrolysis from unprotected glutamate as substrate. The number of glutamate residues added to either RpsF or to poly-alpha-glutamate changes with pH	rimK	TRUE	TRUE	1MX62@1224|Proteobacteria,1RM8B@1236|Gammaproteobacteria,3XMV6@561|Escherichia,COG0189@1|root,COG0189@2|Bacteria			E,F,H,J,Q
GUT_GENOME000026_01866	218.997	One of the essential components for the initiation of protein synthesis. Stabilizes the binding of IF-2 and IF-3 on the 30S subunit to which N-formylmethionyl-tRNA(fMet) subsequently binds. Helps modulate mRNA selection, yielding the 30S pre- initiation complex (PIC). Upon addition of the 50S ribosomal subunit IF-1, IF-2 and IF-3 are released leaving the mature 70S translation initation complex	infA	TRUE	TRUE	1S8WZ@1236|Gammaproteobacteria,1MZFU@1224|Proteobacteria,COG0361@1|root,COG0361@2|Bacteria,1Y8ZY@135625|Pasteurellales	2415		J	1	1
GUT_GENOME000026_01868	1664.43	ATP-binding	cydC	TRUE	TRUE	1RQD7@1236|Gammaproteobacteria,1QU1P@1224|Proteobacteria,COG4987@2|Bacteria,COG4987@1|root,3XNCD@561|Escherichia			C,O,P
GUT_GENOME000026_01870	973.04	Belongs to the class-II pyridine nucleotide-disulfide oxidoreductase family	trxB	TRUE	TRUE	COG0492@2|Bacteria,COG0492@1|root,1RMEX@1236|Gammaproteobacteria,1MV15@1224|Proteobacteria,3XNJ5@561|Escherichia			O
GUT_GENOME000026_01885	680.405	Protein of unknown function (DUF421)	ycaP	TRUE	TRUE	COG2323@2|Bacteria,1MW5I@1224|Proteobacteria,1RS6M@1236|Gammaproteobacteria,3XPE8@561|Escherichia,COG2323@1|root
GUT_GENOME000026_01928	452.137	Required for spatial organization of the terminus region of the chromosome (Ter macrodomain) during the cell cycle. Prevents early segregation of duplicated Ter macrodomains during cell division. Binds specifically to matS, which is a 13 bp signature motif repeated within the Ter macrodomain	matP	TRUE	TRUE	COG3120@2|Bacteria,1S28S@1236|Gammaproteobacteria,COG3120@1|root,1RA57@1224|Proteobacteria,3XMGH@561|Escherichia			D,L
GUT_GENOME000026_01931	618.63	Induces low levels of natural DNA uptake by inducing transcription of the competence genes (the CRP-S regulon) required for DNA transformation. Induction of the CRP-S regulon also requires Sxy-activated promoter (CRP-S), cAMP receptor protein (CRP) and cAMP. Induces CRP-S site-containing genes which are involved in genome maintenance and transcription or encoding transposases and toxin-antitoxin …	sxy	TRUE	TRUE	COG3070@1|root,3XN76@561|Escherichia,1S496@1236|Gammaproteobacteria,1RDWD@1224|Proteobacteria,COG3070@2|Bacteria			K
GUT_GENOME000026_01933	446.358	Inner membrane component domain	yccF	TRUE	TRUE	COG3304@2|Bacteria,COG3304@1|root,3XNXJ@561|Escherichia,1RA96@1224|Proteobacteria,1S1ZC@1236|Gammaproteobacteria
GUT_GENOME000026_02029	689.581	DNA-binding transcription factor activity	yieP	TRUE	TRUE	3XM43@561|Escherichia,1RR9F@1236|Gammaproteobacteria,1MV83@1224|Proteobacteria,COG2186@1|root,COG2186@2|Bacteria			K
GUT_GENOME000026_02043	1847.92	NAD-binding protein involved in the addition of a carboxymethylaminomethyl (cmnm) group at the wobble position (U34) of certain tRNAs, forming tRNA-cmnm(5)s(2)U34	gidA	TRUE	TRUE	COG0445@2|Bacteria,1MU6F@1224|Proteobacteria,COG0445@1|root,1RMM1@1236|Gammaproteobacteria,3XNZB@561|Escherichia			D,J
GUT_GENOME000026_02046	813.231	it plays a direct role in the translocation of protons across the membrane	atpB	TRUE	TRUE	1MV87@1224|Proteobacteria,COG0356@2|Bacteria,COG0356@1|root,1RPHK@1236|Gammaproteobacteria,3XMPD@561|Escherichia			C
GUT_GENOME000026_02068	624.461	Catalyzes strongly the dephosphorylation of 6- phosphogluconate (6P-Glu) and slightly the dephosphorylation of dihydroxyacetone phosphate (DHAP) and phosphoenolpyruvate (PEP). Also hydrolyzes both purines (GMP and IMP) and pyrimidines as secondary substrates	yieH	TRUE	TRUE	COG0637@1|root,1NSPA@1224|Proteobacteria,1RQET@1236|Gammaproteobacteria,COG0637@2|Bacteria,3XMUW@561|Escherichia	1017		G	1	1
GUT_GENOME000026_02082	1064.82	it is required for DNA replication and normal SOS inducibility. RecF binds preferentially to single-stranded, linear DNA. It also seems to bind ATP	recF	TRUE	TRUE	1MX8N@1224|Proteobacteria,1RN5P@1236|Gammaproteobacteria,COG1195@2|Bacteria,COG1195@1|root,3XNSR@561|Escherichia			L
GUT_GENOME000026_02125	1525.23	Mga helix-turn-helix domain		TRUE	FALSE	COG3711@1|root,1RSDI@1236|Gammaproteobacteria,1PKXV@1224|Proteobacteria,COG3711@2|Bacteria,3XRBI@561|Escherichia	940		K	0.875	0
GUT_GENOME000026_02128	1068.72	Pts system fructose-specific		TRUE	FALSE	1RMZC@1236|Gammaproteobacteria,1MXFN@1224|Proteobacteria,3XN1D@561|Escherichia,COG1299@1|root,COG1299@2|Bacteria	941		G	0.942857	0.0285714
GUT_GENOME000026_02130	848.821	Fructose-bisphosphate aldolase class-II	fba	TRUE	FALSE	1MURX@1224|Proteobacteria,COG0191@2|Bacteria,COG0191@1|root,3XRJR@561|Escherichia,1RQUC@1236|Gammaproteobacteria	941		G	0.942857	0.0285714
GUT_GENOME000026_02161	687.793	Lipopolysaccharide core biosynthesis protein (WaaY)	waaY	TRUE	FALSE	COG0661@1|root,1S0QH@1236|Gammaproteobacteria,COG0661@2|Bacteria,3XMH6@561|Escherichia,1QI02@1224|Proteobacteria	230		H,T	1	0
GUT_GENOME000026_02176	467.314	One of the proteins required for the normal export of preproteins out of the cell cytoplasm. It is a molecular chaperone that binds to a subset of precursor proteins, maintaining them in a translocation-competent state. It also specifically binds to its receptor SecA	secB	TRUE	TRUE	1RI75@1224|Proteobacteria,COG1952@2|Bacteria,COG1952@1|root,1S62H@1236|Gammaproteobacteria,3XNNZ@561|Escherichia			U
GUT_GENOME000026_02178	815.805	Belongs to the transferase hexapeptide repeat family	cysE	TRUE	TRUE	COG1045@2|Bacteria,COG1045@1|root,1RNCA@1236|Gammaproteobacteria,1MVFX@1224|Proteobacteria,3XNRD@561|Escherichia			E
GUT_GENOME000026_02184	648.486	Protein of unknown function (DUF3251)		FALSE	TRUE	3XQDP@561|Escherichia,1S5KT@1236|Gammaproteobacteria,1RFVD@1224|Proteobacteria,2ZYYI@2|Bacteria,2C0YN@1|root	1015			0	1
GUT_GENOME000026_02218	1412.85	xylulose metabolic process	xylB	TRUE	TRUE	1RR7X@1236|Gammaproteobacteria,COG1070@2|Bacteria,COG1070@1|root,3XNNY@561|Escherichia,1MW4A@1224|Proteobacteria			F,G
GUT_GENOME000026_02227	290.994	HTH-type transcriptional regulator YiaG	yiaG	TRUE	TRUE	1MZTT@1224|Proteobacteria,1S95K@1236|Gammaproteobacteria,3XPXQ@561|Escherichia,COG2944@1|root,COG2944@2|Bacteria			K
GUT_GENOME000026_02228	708.573	multi-organism cellular process	yiaF	TRUE	TRUE	2ZAGZ@2|Bacteria,28M2J@1|root,1RNW1@1236|Gammaproteobacteria,1QD1H@1224|Proteobacteria,3XMJB@561|Escherichia
GUT_GENOME000026_02270	281.947			TRUE	TRUE
GUT_GENOME000026_02272	1132.06	Part of the tripartite efflux system MdtEF-TolC, which confers resistance to	mdtE	TRUE	TRUE	1MU78@1224|Proteobacteria,COG0845@1|root,3XPI0@561|Escherichia,1SJRC@1236|Gammaproteobacteria,COG0845@2|Bacteria			M,V
GUT_GENOME000026_02273	293.776			TRUE	TRUE
GUT_GENOME000026_02282	492.775	Haem utilisation ChuX/HutX	hutX	TRUE	TRUE	1RJ4R@1224|Proteobacteria,COG3721@2|Bacteria,COG3721@1|root,1S43K@1236|Gammaproteobacteria,3XQEY@561|Escherichia	1022		P	1	0.761905
GUT_GENOME000026_02283	1296.61	coproporphyrinogen III oxidase	hutW	TRUE	TRUE	1RPGS@1236|Gammaproteobacteria,1NTDN@1224|Proteobacteria,3XQ85@561|Escherichia,COG0635@1|root,COG0635@2|Bacteria	1022		H	1	0.761905
GUT_GENOME000026_02286	988.092	Haem utilisation ChuX/HutX	hmuS	TRUE	TRUE	1MW28@1224|Proteobacteria,1RP3D@1236|Gammaproteobacteria,3XNEG@561|Escherichia,COG3720@1|root,COG3720@2|Bacteria	1023		P	1	1
GUT_GENOME000026_02306	269.977	PTS HPr component phosphorylation site		TRUE	TRUE	COG1925@2|Bacteria,COG1925@1|root	911		G,T	1	1
GUT_GENOME000026_02307	1457.63	FGGY family of carbohydrate kinases, N-terminal domain		TRUE	TRUE	1MW06@1224|Proteobacteria,COG1070@1|root,COG1070@2|Bacteria,1RRBK@1236|Gammaproteobacteria,3XQTV@561|Escherichia	911		G	1	1
GUT_GENOME000026_02311	742.059	UTRA domain		TRUE	TRUE	COG2188@1|root,COG2188@2|Bacteria,1RQDC@1236|Gammaproteobacteria,1R5W1@1224|Proteobacteria	911		K	1	1
GUT_GENOME000026_02314	801.018	Part of the ABC transporter complex NikABCDE involved in nickel import. Responsible for energy coupling to the transport system	nikE	TRUE	TRUE	1R3X1@1224|Proteobacteria,1RMIC@1236|Gammaproteobacteria,COG1124@1|root,COG1124@2|Bacteria,3XM78@561|Escherichia			E,P
GUT_GENOME000026_02315	755.305	Part of the ABC transporter complex NikABCDE involved in nickel import. Responsible for energy coupling to the transport system	nikD	TRUE	TRUE	1R4F4@1224|Proteobacteria,COG0444@1|root,1RZNK@1236|Gammaproteobacteria,COG0444@2|Bacteria,3XPEJ@561|Escherichia			E,P
GUT_GENOME000026_02317	936.318	Nickel transport system permease protein NikB	nikB	TRUE	TRUE	COG0601@1|root,COG0601@2|Bacteria,3XMHP@561|Escherichia,1MU8Z@1224|Proteobacteria,1RP7R@1236|Gammaproteobacteria			E,P
GUT_GENOME000026_02318	1553.92	periplasmic	nikA	TRUE	TRUE	COG0747@1|root,COG0747@2|Bacteria,1P1HT@1224|Proteobacteria,1RQ7Z@1236|Gammaproteobacteria,3XPAH@561|Escherichia			E
GUT_GENOME000026_02385	573.808	Involved in iron-sulfur cluster biogenesis. Binds a 4Fe- 4S cluster, can transfer this cluster to apoproteins, and thereby intervenes in the maturation of Fe S proteins. Could also act as a scaffold chaperone for damaged Fe S proteins	nfuA	TRUE	TRUE	COG0694@2|Bacteria,COG0694@1|root,1MU8Y@1224|Proteobacteria,COG0316@1|root,COG0316@2|Bacteria,1RN7J@1236|Gammaproteobacteria,3XNB4@561|Escherichia			O
GUT_GENOME000026_02431	598.172	adenylyltransferase that mediates the addition of adenosine 5'-monophosphate (AMP) to specific residues of target proteins (By similarity). Involved in cell filamentation induced by cyclic AMP. May have some role in cell division	fic	TRUE	TRUE	1R72A@1224|Proteobacteria,1RYM7@1236|Gammaproteobacteria,3XM4Y@561|Escherichia,COG2184@1|root,COG2184@2|Bacteria			D,T
GUT_GENOME000026_02432	562.395	Part of a heterodimeric complex that catalyzes the two- step biosynthesis of 4-amino-4-deoxychorismate (ADC), a precursor of p-aminobenzoate (PABA) and tetrahydrofolate. In the first step, a glutamine amidotransferase (PabA) generates ammonia as a substrate that, along with chorismate, is used in the second step, catalyzed by aminodeoxychorismate synthase (PabB) to produce ADC. PabA converts glut…	pabA	TRUE	TRUE	1RMQW@1236|Gammaproteobacteria,1MV5Y@1224|Proteobacteria,COG0512@2|Bacteria,COG0512@1|root,3XN45@561|Escherichia			E,H
GUT_GENOME000026_02450	287.993	Part of a sulfur-relay system required for 2-thiolation of 5-methylaminomethyl-2-thiouridine (mnm(5)s(2)U) at tRNA wobble positions	tusB	TRUE	TRUE	COG2168@2|Bacteria,COG2168@1|root,1SGPI@1236|Gammaproteobacteria,1NGF3@1224|Proteobacteria			J,P
GUT_GENOME000026_02453	2080.05	Catalyzes the GTP-dependent ribosomal translocation step during translation elongation. During this step, the ribosome changes from the pre-translocational (PRE) to the post- translocational (POST) state as the newly formed A-site-bound peptidyl-tRNA and P-site-bound deacylated tRNA move to the P and E sites, respectively. Catalyzes the coordinated movement of the two tRNA molecules, the mRNA and…	fusA	TRUE	TRUE	COG0480@2|Bacteria,COG0480@1|root,1MUCV@1224|Proteobacteria,1RNSZ@1236|Gammaproteobacteria,3XMEB@561|Escherichia			J
GUT_GENOME000026_02539	715.59	Catalyzes the formation of N(7)-methylguanine at position 46 (m7G46) in tRNA	trmB	TRUE	TRUE	COG0220@2|Bacteria,COG0220@1|root,1MUWJ@1224|Proteobacteria,1RMFG@1236|Gammaproteobacteria,3XMUZ@561|Escherichia			J
GUT_GENOME000026_02540	326.855	Protein with unknown function (DUF469)	yggL	TRUE	TRUE	COG3171@1|root,1S6UT@1236|Gammaproteobacteria,COG3171@2|Bacteria,1RH3U@1224|Proteobacteria,3XPPI@561|Escherichia
GUT_GENOME000026_02554	703.447	deoxyribonuclease I activity	endA	TRUE	TRUE	COG2356@2|Bacteria,1MXQM@1224|Proteobacteria,1RPX9@1236|Gammaproteobacteria,COG2356@1|root,3XN9S@561|Escherichia			L
GUT_GENOME000026_02558	251.984	Protein of unknown function (DUF2684)	yqgD	TRUE	TRUE	2C4JF@1|root,1SU2F@1236|Gammaproteobacteria,1PBF5@1224|Proteobacteria,2ZP5F@2|Bacteria
GUT_GENOME000026_02577	1154.97	Belongs to the phosphoglycerate kinase family	pgk	TRUE	TRUE	1MUNU@1224|Proteobacteria,1RMUQ@1236|Gammaproteobacteria,COG0126@2|Bacteria,COG0126@1|root,3XN0J@561|Escherichia			F,G
GUT_GENOME000026_02581	738.645	cellular response to heat	yggE	TRUE	TRUE	3XNCG@561|Escherichia,1RP7T@1236|Gammaproteobacteria,1RH7T@1224|Proteobacteria,COG2968@2|Bacteria,COG2968@1|root
GUT_GENOME000026_02587	1206.5	Catalyzes the reversible oxidation of 3-phospho-D- glycerate to 3-phosphonooxypyruvate, the first step of the phosphorylated L-serine biosynthesis pathway. Also catalyzes the reversible oxidation of 2-hydroxyglutarate to 2-oxoglutarate	serA	TRUE	TRUE	COG0111@2|Bacteria,COG0111@1|root,3XNAF@561|Escherichia,1RPEY@1236|Gammaproteobacteria,1MU5Z@1224|Proteobacteria			E,H
GUT_GENOME000026_02606	1675.39	single-stranded-DNA-specific exonuclease RecJ	recJ	TRUE	TRUE	1RMF4@1236|Gammaproteobacteria,COG0608@2|Bacteria,1MU1M@1224|Proteobacteria,COG0608@1|root,3XP91@561|Escherichia			L
GUT_GENOME000026_02624	919.784	Belongs to the carbamate kinase family	yqeA	FALSE	TRUE	1RP78@1236|Gammaproteobacteria,1MWXC@1224|Proteobacteria,3XN33@561|Escherichia,COG0549@2|Bacteria,COG0549@1|root			E
GUT_GENOME000026_02668	530.343	Accelerates the degradation of transcripts by removing pyrophosphate from the 5'-end of triphosphorylated RNA, leading to a more labile monophosphorylated state that can stimulate subsequent ribonuclease cleavage	nudH	TRUE	TRUE	COG0494@1|root,COG0494@2|Bacteria,1S3PQ@1236|Gammaproteobacteria,1RDGJ@1224|Proteobacteria,3XN4C@561|Escherichia			L,V
GUT_GENOME000026_02686	938.97	S-adenosyl-L-homocysteine hydrolase, NAD binding domain		TRUE	FALSE	1S6T2@1236|Gammaproteobacteria,COG0111@1|root,COG0111@2|Bacteria,1R7F9@1224|Proteobacteria,3XRH3@561|Escherichia	942		E,H	1	0.5
GUT_GENOME000026_02730	329.946	single-species biofilm formation	yqcC	TRUE	TRUE	COG3098@2|Bacteria,COG3098@1|root,3XPR2@561|Escherichia,1SCXJ@1236|Gammaproteobacteria,1N7AG@1224|Proteobacteria
GUT_GENOME000026_02735	1304.38	Catalyzes the dehydration of glucarate to 5-keto-4- deoxy-D-glucarate (5-kdGluc). Also acts on L-idarate	gudD	TRUE	TRUE	COG4948@1|root,COG4948@2|Bacteria,1RNE2@1236|Gammaproteobacteria,1NAKW@1224|Proteobacteria,3XPFN@561|Escherichia			M,R
GUT_GENOME000026_02771	602.704	Catalyzes the synthesis of activated sulfate	cysC	TRUE	TRUE	1RNWT@1236|Gammaproteobacteria,1MX0D@1224|Proteobacteria,COG0529@2|Bacteria,COG0529@1|root,3XPBT@561|Escherichia			F,P
GUT_GENOME000026_02799	461.369	Regulatory protein for the formate hydrogenlyase system. Could act by directly interacting with FhlA or by preventing the binding of FhlA to the upstream activatory sequence	hycA	TRUE	TRUE	3XNMX@561|Escherichia,305VH@2|Bacteria,2C05Z@1|root,1RD07@1224|Proteobacteria,1S49S@1236|Gammaproteobacteria			K
GUT_GENOME000026_02842	528.858	Negative regulator of the multidrug operon emrAB	mprA	TRUE	TRUE	COG1846@1|root,COG1846@2|Bacteria,1NWZ4@1224|Proteobacteria,1RPCJ@1236|Gammaproteobacteria,3XP69@561|Escherichia			K
GUT_GENOME000026_02856	403.808	Hha and Cnu (YdgT) increases the number of genes DNA bound by H-NS StpA and may also modulate the oligomerization of the H-NS StpA-complex. Repression can be inhibited by dominant-negative mutants of StpA or H-NS	stpA	TRUE	TRUE	COG2916@1|root,COG2916@2|Bacteria,3XPN4@561|Escherichia,1S6P8@1236|Gammaproteobacteria,1RE55@1224|Proteobacteria			K
GUT_GENOME000026_02896	716.545	Required for the biogenesis of type 1 fimbriae. Binds and interact with FimH	fimC	TRUE	TRUE	1RS56@1236|Gammaproteobacteria,1R3T9@1224|Proteobacteria,COG3121@2|Bacteria,COG3121@1|root,3XNMT@561|Escherichia	288		N,U,W	1	1
GUT_GENOME000026_02922	1148.68	Catalyzes the hydrolytic cleavage of a subset of L- isoaspartyl (L-beta-aspartyl) dipeptides. Used to degrade proteins damaged by L-isoaspartyl residues formation	iadA	TRUE	TRUE	1QUJ0@1224|Proteobacteria,1T26K@1236|Gammaproteobacteria,COG1820@2|Bacteria,COG1820@1|root,3XP62@561|Escherichia			E,G
GUT_GENOME000026_02923	460.974	Nucleoside recognition	yjiG	TRUE	TRUE	COG0700@2|Bacteria,COG0700@1|root,1T006@1236|Gammaproteobacteria,1R4W8@1224|Proteobacteria,3XQ0K@561|Escherichia
GUT_GENOME000026_02955	734.382	This protein is required for chromosomal replication. It forms, in concert with DnaB protein and other prepriming proteins DnaT, N, N', N'' a prepriming protein complex on the specific site of the template DNA recognized by protein N'	dnaC	TRUE	TRUE	1MZNW@1224|Proteobacteria,COG1484@1|root,1RQFW@1236|Gammaproteobacteria,COG1484@2|Bacteria,3XMDA@561|Escherichia			L
GUT_GENOME000026_02998	461.428	Involved in allosteric regulation of aspartate carbamoyltransferase	pyrI	TRUE	FALSE	1S2BM@1236|Gammaproteobacteria,1RB7J@1224|Proteobacteria,COG1781@1|root,COG1781@2|Bacteria,3XNQ2@561|Escherichia			F
GUT_GENOME000026_03022	206.999	Protein of unknown function (DUF1107)	ytfK	TRUE	TRUE	2CTIP@1|root,32STK@2|Bacteria,1MZ8V@1224|Proteobacteria,1S908@1236|Gammaproteobacteria,3XQ29@561|Escherichia
GUT_GENOME000026_03086	970.592	With EpmB is involved in the beta-lysylation step of the post-translational modification of translation elongation factor P (EF-P) on 'Lys-34'. Catalyzes the ATP-dependent activation of (R)- beta-lysine produced by EpmB, forming a lysyl-adenylate, from which the beta-lysyl moiety is then transferred to the epsilon- amino group of EF-P 'Lys-34'	epmA	TRUE	TRUE	3XP5E@561|Escherichia,COG2269@2|Bacteria,COG2269@1|root,1MU97@1224|Proteobacteria,1RMR9@1236|Gammaproteobacteria			J
GUT_GENOME000026_03095	564.016	Involved in peptide bond synthesis. Alleviates ribosome stalling that occurs when 3 or more consecutive Pro residues or the sequence PPG is present in a protein, possibly by augmenting the peptidyl transferase activity of the ribosome	efp	TRUE	TRUE	COG0231@2|Bacteria,COG0231@1|root,1RPW7@1236|Gammaproteobacteria,1MW2J@1224|Proteobacteria,3XN9A@561|Escherichia			J
GUT_GENOME000026_03100	293.966	Binds to Cpn60 in the presence of Mg-ATP and suppresses the ATPase activity of the latter	groS	TRUE	TRUE	COG0234@1|root,1S8YR@1236|Gammaproteobacteria,1MZ2X@1224|Proteobacteria,COG0234@2|Bacteria,3XPUM@561|Escherichia	1970		O	1	1
GUT_GENOME000026_03102	474.36	Suppressor of F exclusion of phage T7	fxsA	TRUE	TRUE	COG3030@1|root,COG3030@2|Bacteria,1MZJJ@1224|Proteobacteria,1S8XU@1236|Gammaproteobacteria,3XPKI@561|Escherichia			R
GUT_GENOME000026_03216	983.315	Phosphonate ABC transporter	phnD	TRUE	TRUE	COG3221@2|Bacteria,COG3221@1|root,1RR46@1236|Gammaproteobacteria,1MXD8@1224|Proteobacteria			P
GUT_GENOME000026_03258	221.98	Protein involved in biological_process	yhdV	TRUE	TRUE	1S8YI@1236|Gammaproteobacteria,2CDN7@1|root,32RY2@2|Bacteria,1N0QR@1224|Proteobacteria,3WYRQ@544|Citrobacter
GUT_GENOME000026_03273	863.141	Periplasmic binding protein domain		TRUE	FALSE	COG1879@2|Bacteria,COG1879@1|root,3XRFX@561|Escherichia,1RP6T@1236|Gammaproteobacteria,1NRXG@1224|Proteobacteria	941		G	0.942857	0.0285714
GUT_GENOME000026_03274	1463.18	Part of the ABC transporter complex RbsABC involved in ribose import. Responsible for energy coupling to the transport system		TRUE	FALSE	3XN9K@561|Escherichia,1RMCH@1236|Gammaproteobacteria,COG1129@2|Bacteria,COG1129@1|root,1MU22@1224|Proteobacteria	941		G,P	0.942857	0.0285714
GUT_GENOME000026_03277	988.675	Thioredoxin	IV02_08475	TRUE	FALSE	COG2017@1|root,COG2017@2|Bacteria,1MVUY@1224|Proteobacteria,1RQ29@1236|Gammaproteobacteria,3XR9C@561|Escherichia	941		G	0.942857	0.0285714
GUT_GENOME000026_03327	565.868	Involved in the biosynthesis of lipopolysaccharides (LPSs). Catalyzes the hydrolysis of 3-deoxy-D-manno-octulosonate 8-phosphate (KDO 8-P) to 3-deoxy-D-manno-octulosonate (KDO) and inorganic phosphate	kdsC	TRUE	TRUE	COG1778@2|Bacteria,COG1778@1|root,1RH85@1224|Proteobacteria,1S6D0@1236|Gammaproteobacteria,3XMZT@561|Escherichia			F,M,R
GUT_GENOME000026_03329	971.468	calcium:cation antiporter activity	yrbG	TRUE	TRUE	COG0530@1|root,COG0530@2|Bacteria,1RMRD@1236|Gammaproteobacteria,1MU3R@1224|Proteobacteria,3XMSD@561|Escherichia			P
GUT_GENOME000026_03334	293.949	Part of the ABC transporter complex MlaFEDB that actively prevents phospholipid accumulation at the cell surface. Probably maintains lipid asymmetry in the outer membrane by retrograde trafficking of phospholipids from the outer membrane to the inner membrane	mlaB	TRUE	TRUE	COG3113@2|Bacteria,1NGIE@1224|Proteobacteria,1SD2Q@1236|Gammaproteobacteria,COG3113@1|root			M
GUT_GENOME000026_03344	475.954	Necessary for efficient RNA polymerase transcription elongation past template-encoded arresting sites. The arresting sites in DNA have the property of trapping a certain fraction of elongating RNA polymerases that pass through, resulting in locked ternary complexes. Cleavage of the nascent transcript by cleavage factors such as GreA or GreB allows the resumption of elongation from the new 3'termi…	greA	TRUE	TRUE	1S3UP@1236|Gammaproteobacteria,COG0782@1|root,COG0782@2|Bacteria,1RCXW@1224|Proteobacteria,3XMI4@561|Escherichia			K
GUT_GENOME000026_03348	844.835	Catalyzes the condensation of para-aminobenzoate (pABA) with 6-hydroxymethyl-7,8-dihydropterin diphosphate (DHPt-PP) to form 7,8-dihydropteroate (H2Pte), the immediate precursor of folate derivatives	folP	TRUE	TRUE	1MUIR@1224|Proteobacteria,1RM8G@1236|Gammaproteobacteria,COG0294@1|root,COG0294@2|Bacteria,3XM3V@561|Escherichia			H
GUT_GENOME000026_03350	332.646	Preprotein translocase band 1 subunit	secG	TRUE	TRUE	COG1314@1|root,COG1314@2|Bacteria,1SD3P@1236|Gammaproteobacteria,1N8MF@1224|Proteobacteria,3XPS3@561|Escherichia			U
GUT_GENOME000026_03376	588.689	Required for the timely initiation of chromosomal replication via direct interactions with the DnaA initiator protein	diaA	TRUE	TRUE	COG0279@2|Bacteria,COG0279@1|root,3XMII@561|Escherichia,1RS1Y@1236|Gammaproteobacteria,1NJ8X@1224|Proteobacteria			G,J
GUT_GENOME000026_03468	651.789	Catalyzes the conversion of D-ribulose 5-phosphate to formate and 3,4-dihydroxy-2-butanone 4-phosphate	ribB	TRUE	TRUE	1MU8P@1224|Proteobacteria,1RQ49@1236|Gammaproteobacteria,3XMEU@561|Escherichia,COG0108@1|root,COG0108@2|Bacteria			H
GUT_GENOME000026_03477	662.089	Involved in disulfide-bond formation. Acts by transferring its disulfide bond to other proteins. Part of a redox system composed of DsbI and DsbL that mediates formation of an essential disulfide bond in AssT	dsbL	TRUE	TRUE	COG2761@2|Bacteria,COG2761@1|root,3XPB0@561|Escherichia,1PXR7@1224|Proteobacteria,1RQXE@1236|Gammaproteobacteria	939		O,Q	1	1
GUT_GENOME000026_03478	1685.03	Catalyzes the transfer of sulfuryl groups between phenolic compounds	assT	TRUE	TRUE	3XPFJ@561|Escherichia,2ZAQ1@2|Bacteria,28MBK@1|root,1R5CV@1224|Proteobacteria,1RQPD@1236|Gammaproteobacteria	939		M	1	1
GUT_GENOME000026_03483	422.887	Protein of unknown function (DUF1249)	yqiB	TRUE	TRUE	1RA4E@1224|Proteobacteria,1S55I@1236|Gammaproteobacteria,COG3151@2|Bacteria,COG3151@1|root,3XN24@561|Escherichia
GUT_GENOME000026_03487	2059.76	Receptor		TRUE	FALSE	1RNBT@1236|Gammaproteobacteria,1QTT0@1224|Proteobacteria,COG4773@1|root,COG4773@2|Bacteria	1025		P	1	0
GUT_GENOME000026_03491	928.599	Periplasmic binding protein		TRUE	FALSE	COG0614@2|Bacteria,1RNUD@1236|Gammaproteobacteria,COG0614@1|root,1P7NU@1224|Proteobacteria,3XQUH@561|Escherichia	1025		P	1	0
GUT_GENOME000026_03499	657.904	Member of a two-component regulatory system QseB QseC. Activates the flagella regulon by activating transcription of FlhDC. Currently it is not known whether this effect is direct or not	qseB	TRUE	TRUE	3XP78@561|Escherichia,1RQQ3@1236|Gammaproteobacteria,1N0YI@1224|Proteobacteria,COG0745@2|Bacteria,COG0745@1|root			K,T
GUT_GENOME000026_03508	962.514	Bacterial extracellular solute-binding protein, family 7	yiaO	TRUE	FALSE	COG1638@1|root,1RPNJ@1236|Gammaproteobacteria,1MVHC@1224|Proteobacteria,3XPXK@561|Escherichia,COG1638@2|Bacteria	941		G	0.942857	0.0285714
GUT_GENOME000026_03509	992.686	Malate/L-lactate dehydrogenase	allD	TRUE	FALSE	1MWQY@1224|Proteobacteria,3XQR6@561|Escherichia,1RSKW@1236|Gammaproteobacteria,COG2055@2|Bacteria,COG2055@1|root	941		C	0.942857	0.0285714
GUT_GENOME000026_03510	1006.13	Alcohol dehydrogenase GroES domain protein		TRUE	FALSE	COG1063@2|Bacteria,COG1063@1|root,1MWX0@1224|Proteobacteria,1RR1W@1236|Gammaproteobacteria,3XQRE@561|Escherichia	941		E,R	0.942857	0.0285714
GUT_GENOME000026_03531	1662.59	Belongs to the NiFe NiFeSe hydrogenase large subunit family	hybC	TRUE	TRUE	3XNXZ@561|Escherichia,COG0374@2|Bacteria,COG0374@1|root,1RMC3@1236|Gammaproteobacteria,1MWFJ@1224|Proteobacteria			C
GUT_GENOME000026_03543	811.325		JD73_00845	FALSE	TRUE	2Z7UR@2|Bacteria,1MW3E@1224|Proteobacteria,28HJM@1|root,3XMHB@561|Escherichia,1RPJ1@1236|Gammaproteobacteria	129			0.615385	1
GUT_GENOME000026_03583	732.065	Cytidylyltransferase		TRUE	FALSE	1SYRY@1236|Gammaproteobacteria,COG1212@1|root,COG1212@2|Bacteria,1MUUU@1224|Proteobacteria,3XQNI@561|Escherichia	1039		M	1	0.142857
GUT_GENOME000026_03613	732.261	Belongs to the PHP family	ycdX	TRUE	TRUE	COG1387@1|root,3XNRR@561|Escherichia,1RRE9@1236|Gammaproteobacteria,1MYXV@1224|Proteobacteria,COG1387@2|Bacteria			E,R
GUT_GENOME000026_03665	520.789	Plays a role in synthesis, processing and or stability of 23S rRNA	yceD	TRUE	TRUE	1RRK3@1236|Gammaproteobacteria,COG1399@1|root,COG1399@2|Bacteria,1PGKW@1224|Proteobacteria,3XMXZ@561|Escherichia			J
GUT_GENOME000026_03676	990.432	Part of the beta sliding clamp loading complex, which hydrolyzes ATP to load the beta clamp onto primed DNA to form the DNA replication pre-initiation complex. DNA polymerase III is a complex, multichain enzyme responsible for most of the replicative synthesis in bacteria. This DNA polymerase also exhibits 3' to 5' exonuclease activity. The gamma complex (gamma(3),delta,delta') is thought to load…	holB	TRUE	TRUE	COG0470@2|Bacteria,COG0470@1|root,3XMF9@561|Escherichia,1MY1W@1224|Proteobacteria,1RNYA@1236|Gammaproteobacteria			L
GUT_GENOME000026_03684	1009.96	Plays a role in peptidoglycan recycling by cleaving the terminal beta-1,4-linked N-acetylglucosamine (GlcNAc) from peptide-linked peptidoglycan fragments, giving rise to free GlcNAc, anhydro-N-acetylmuramic acid and anhydro-N-acetylmuramic acid-linked peptides	nagZ	TRUE	TRUE	1RMQF@1236|Gammaproteobacteria,COG1472@2|Bacteria,COG1472@1|root,1MVAJ@1224|Proteobacteria,3XN5W@561|Escherichia			G,M
GUT_GENOME000026_03687	536.396	regulation of single-species biofilm formation	ycfJ	TRUE	TRUE	COG3134@2|Bacteria,COG3134@1|root,1MVWD@1224|Proteobacteria,1RQR9@1236|Gammaproteobacteria,3XNC0@561|Escherichia
GUT_GENOME000026_03712	648.161	Responsible for synthesis of pseudouridine from uracil- 2457 in 23S ribosomal RNA	rluE	TRUE	TRUE	COG1187@1|root,COG1187@2|Bacteria,1R9VV@1224|Proteobacteria,1S1ZX@1236|Gammaproteobacteria,3XMPV@561|Escherichia			J
GUT_GENOME000026_03725	928.168			FALSE	TRUE	1NXMM@1224|Proteobacteria,1SQR2@1236|Gammaproteobacteria,2ED3D@1|root,33709@2|Bacteria
GUT_GENOME000026_03726	472.941			FALSE	TRUE	2EPWB@1|root,4NY4R@976|Bacteroidetes,30VX6@2|Bacteria
GUT_GENOME000026_03795	266.998	Prevents the cell division inhibition by proteins MinC and MinD at internal division sites while permitting inhibition at polar sites. This ensures cell division at the proper site by restricting the formation of a division septum at the midpoint of the long axis of the cell	minE	TRUE	TRUE	1SC8W@1236|Gammaproteobacteria,3X2JE@547|Enterobacter,COG0851@1|root,COG0851@2|Bacteria,1N6QD@1224|Proteobacteria			D
GUT_GENOME000026_03838	729.287	Transglutaminase-like superfamily	ychA	TRUE	TRUE	3XP28@561|Escherichia,1RQ7V@1236|Gammaproteobacteria,COG2912@1|root,COG2912@2|Bacteria,1MVJQ@1224|Proteobacteria			T
GUT_GENOME000026_03861	932.591	phosphatidylcholine metabolic process	rssA	TRUE	TRUE	COG1752@2|Bacteria,COG1752@1|root,3XQ8D@561|Escherichia,1RRA1@1236|Gammaproteobacteria,1MUM9@1224|Proteobacteria			R
GUT_GENOME000026_03885	498.88	cellular response to DNA damage stimulus	yciE	TRUE	TRUE	1R4MJ@1224|Proteobacteria,COG3685@2|Bacteria,COG3685@1|root,1RRW4@1236|Gammaproteobacteria,3XPRR@561|Escherichia	2423		P	1	1
GUT_GENOME000026_03908	308.922	Involved in the assembly of lipopolysaccharide (LPS)	lapA	TRUE	TRUE	1MZGX@1224|Proteobacteria,1S9X9@1236|Gammaproteobacteria,COG3771@2|Bacteria,COG3771@1|root,3XPVZ@561|Escherichia
GUT_GENOME000026_03923	1132.22	Uncharacterised MFS-type transporter YbfB	tcaB	TRUE	FALSE	COG0477@1|root,COG2814@2|Bacteria,3XQJA@561|Escherichia,1RRES@1236|Gammaproteobacteria,1MW19@1224|Proteobacteria	1022		E,G,P,R	1	0.761905
GUT_GENOME000026_03927	955.225	permease protein sapB	sapB	TRUE	TRUE	3XM3Z@561|Escherichia,1T1RR@1236|Gammaproteobacteria,1QUAU@1224|Proteobacteria,COG4168@1|root,COG4168@2|Bacteria			V
GUT_GENOME000026_03992	543.563	YaeQ protein	yaeQ	TRUE	TRUE	1RDR9@1224|Proteobacteria,1S43N@1236|Gammaproteobacteria,COG4681@1|root,COG4681@2|Bacteria,3XNZK@561|Escherichia
GUT_GENOME000026_03994	231.276	transcription antitermination	rof	TRUE	TRUE	1S8Y7@1236|Gammaproteobacteria,1MZYG@1224|Proteobacteria,COG4568@2|Bacteria,COG4568@1|root			K
GUT_GENOME000026_04002	781.696	Involved in the biosynthesis of lipid A, a phosphorylated glycolipid that anchors the lipopolysaccharide to the outer membrane of the cell	lpxA	TRUE	TRUE	COG1043@1|root,COG1043@2|Bacteria,1RPHB@1236|Gammaproteobacteria,1MUHQ@1224|Proteobacteria,3XP5H@561|Escherichia			M
GUT_GENOME000026_04007	1338.38	A site-2 regulated intramembrane protease (S2P) that cleaves the peptide bond between 'Ala-108' and 'Cys-109' in the transmembrane region of RseA. Part of a regulated intramembrane proteolysis (RIP) cascade. Acts on DegS-cleaved RseA to release the cytoplasmic domain of RseA	rseP	TRUE	TRUE	COG0750@2|Bacteria,1RMIX@1236|Gammaproteobacteria,1MU91@1224|Proteobacteria,COG0750@1|root,3XNTH@561|Escherichia			K,M,O
GUT_GENOME000026_04013	722.606	Catalyzes the reversible phosphorylation of UMP to UDP	pyrH	TRUE	TRUE	1MV3N@1224|Proteobacteria,COG0528@1|root,1RMHX@1236|Gammaproteobacteria,COG0528@2|Bacteria,3XP3X@561|Escherichia			F
GUT_GENOME000026_04048	1145.46	Fimbrial protein	yadC	TRUE	FALSE	COG3539@1|root,1SIJ1@1236|Gammaproteobacteria,COG3539@2|Bacteria,3XR4K@561|Escherichia,1NKD6@1224|Proteobacteria	964		N,U	1	0
GUT_GENOME000026_04055	766.83	transmembrane transport	yadH	TRUE	TRUE	COG0842@1|root,COG0842@2|Bacteria,3XMRT@561|Escherichia,1RP0Z@1236|Gammaproteobacteria,1MUH1@1224|Proteobacteria			V
GUT_GENOME000026_04072	287.497	immunity protein		TRUE	FALSE	2EAVP@1|root,1SBRU@1236|Gammaproteobacteria,334X2@2|Bacteria,1N1GF@1224|Proteobacteria	923			1	0
GUT_GENOME000026_04126	2669.06	Transcription regulator that activates transcription by stimulating RNA polymerase (RNAP) recycling in case of stress conditions such as supercoiled DNA or high salt concentrations. Probably acts by releasing the RNAP, when it is trapped or immobilized on tightly supercoiled DNA. Does not activate transcription on linear DNA. Probably not involved in DNA repair	rapA	TRUE	TRUE	3XNHH@561|Escherichia,COG0553@1|root,COG0553@2|Bacteria,1MX6H@1224|Proteobacteria,1RNRZ@1236|Gammaproteobacteria			K,L
GUT_GENOME000026_04133	377.903	ApaG domain	apaG	TRUE	TRUE	1MZ2Z@1224|Proteobacteria,1S8SE@1236|Gammaproteobacteria,COG2967@1|root,COG2967@2|Bacteria,3XPM5@561|Escherichia			P
GUT_GENOME000026_04173	586.544	Catalyzes the adenylation of molybdopterin as part of the biosynthesis of the molybdenum-cofactor	mog	TRUE	TRUE	1R9W2@1224|Proteobacteria,COG0521@2|Bacteria,COG0521@1|root,3XMRI@561|Escherichia,1RMZM@1236|Gammaproteobacteria			F,H
GUT_GENOME000026_04185	686.808	Transcriptional regulatory protein, C terminal	creB	TRUE	TRUE	1MVCB@1224|Proteobacteria,COG0745@2|Bacteria,COG0745@1|root,1S179@1236|Gammaproteobacteria,3XPC1@561|Escherichia			K,T
GUT_GENOME000026_04193	284.989	Helix-turn-helix domain		TRUE	FALSE	1N155@1224|Proteobacteria,COG2944@2|Bacteria,COG2944@1|root,3XRDI@561|Escherichia,1S8UJ@1236|Gammaproteobacteria	937		K	0.5	0
GUT_GENOME000026_04235	785.157	transcriptional regulator	yihW	TRUE	FALSE	COG1349@1|root,COG1349@2|Bacteria,1MUJG@1224|Proteobacteria,3XP99@561|Escherichia,1RQW5@1236|Gammaproteobacteria	2342		G,K	1	0
GUT_GENOME000026_04238	876.563	Cleaves 6-deoxy-6-sulfo-D-fructose 1-phosphate (SFP) to form dihydroxyacetone phosphate (DHAP) and 3-sulfolactaldehyde (SLA)	yihT	TRUE	FALSE	COG3684@1|root,1T0SP@1236|Gammaproteobacteria,1R4PC@1224|Proteobacteria,3XRMM@561|Escherichia,COG3684@2|Bacteria	2342		G,P	1	0
GUT_GENOME000026_04254	634.703	Allows to use formate as major electron donor during aerobic respiration. Subunit gamma is probably the cytochrome b556(FDO) component of the formate dehydrogenase	fdoI	TRUE	TRUE	1MXFQ@1224|Proteobacteria,COG2864@1|root,COG2864@2|Bacteria,1RNHH@1236|Gammaproteobacteria,3XP33@561|Escherichia			C
GUT_GENOME000026_04272	696.948	Response regulator member of the two-component regulatory system CpxA CpxR which responds to envelope stress response by activating expression of downstream genes including cpxP, degP, dsbA and ppiA. Required for efficient binding of stationary phase cells to hydrophobic surfaces, part of the process of biofilm formation. Induced upon cell surface binding, subsequently induces genes it controls (…	cpxR	TRUE	TRUE	1MVCB@1224|Proteobacteria,COG0745@2|Bacteria,COG0745@1|root,1RMW7@1236|Gammaproteobacteria,3XMD6@561|Escherichia			K,T
GUT_GENOME000026_04292	530.227	Protease subunit of a proteasome-like degradation complex believed to be a general protein degrading machinery	hslV	TRUE	TRUE	COG5405@1|root,1MVF2@1224|Proteobacteria,1RP7P@1236|Gammaproteobacteria,COG5405@2|Bacteria,3XP2F@561|Escherichia			O
GUT_GENOME000026_04314	320.235	The phosphoenolpyruvate-dependent sugar phosphotransferase system (sugar PTS), a major carbohydrate active transport system, catalyzes the phosphorylation of incoming sugar substrates concomitantly with their translocation across the cell membrane. The enzyme II FrwABC PTS system is involved in fructose transport	frwB	TRUE	TRUE	COG1445@1|root,COG1445@2|Bacteria,1RHSU@1224|Proteobacteria,1S6R1@1236|Gammaproteobacteria,3XPSP@561|Escherichia	736		G	1	1
GUT_GENOME000026_04348	269.972	Part of the twin-arginine translocation (Tat) system that transports large folded proteins containing a characteristic twin-arginine motif in their signal peptide across membranes. TatA could form the protein-conducting channel of the Tat system	tatA	TRUE	TRUE	COG1826@2|Bacteria,COG1826@1|root,1SCC7@1236|Gammaproteobacteria,1N6S4@1224|Proteobacteria,3XPXZ@561|Escherichia			U
GUT_GENOME000026_04349	1615.83	Is probably a protein kinase regulator of UbiI activity which is involved in aerobic coenzyme Q (ubiquinone) biosynthesis	ubiB	TRUE	TRUE	COG0661@1|root,1MU1Z@1224|Proteobacteria,1RNQM@1236|Gammaproteobacteria,COG0661@2|Bacteria,3XNRF@561|Escherichia			H,T
GUT_GENOME000026_04357	505.601	Tripartite tricarboxylate transporter TctB family		TRUE	FALSE	1NCUI@1224|Proteobacteria,2EFEV@1|root,3397N@2|Bacteria	941			0.942857	0.0285714
GUT_GENOME000026_04364	1515.13	CoA binding domain		TRUE	FALSE	1MWWN@1224|Proteobacteria,COG0074@2|Bacteria,COG0074@1|root,3XPFR@561|Escherichia,1RME7@1236|Gammaproteobacteria	941		C	0.942857	0.0285714
GUT_GENOME000026_04366	941.217	Belongs to the carbamate kinase family		TRUE	FALSE	COG0549@1|root,COG0549@2|Bacteria,3XNE0@561|Escherichia,1RP78@1236|Gammaproteobacteria,1MWXC@1224|Proteobacteria	941		E	0.942857	0.0285714
GUT_GENOME000026_04367	389.268	Allophanate hydrolase		TRUE	FALSE	1RR5Z@1236|Gammaproteobacteria,3XQ1E@561|Escherichia,COG0154@1|root,COG0154@2|Bacteria,1MUVQ@1224|Proteobacteria	941		J	0.942857	0.0285714
GUT_GENOME000026_04368	1202.99	Permease for cytosine/purines, uracil, thiamine, allantoin		TRUE	FALSE	1RPMZ@1236|Gammaproteobacteria,COG1457@2|Bacteria,COG1457@1|root,3XQ7V@561|Escherichia,1PNMU@1224|Proteobacteria	940		F	0.875	0
GUT_GENOME000026_04369	895.912	LysR substrate binding domain	Z012_07855	TRUE	FALSE	1P293@1224|Proteobacteria,3XQU9@561|Escherichia,COG0583@2|Bacteria,1RPK0@1236|Gammaproteobacteria,COG0583@1|root	940		K	0.875	0
GUT_GENOME000026_04398	203.999	Prokaryotic lipoprotein-attachment site	yifL	TRUE	TRUE	COG5567@1|root,COG5567@2|Bacteria,1N70H@1224|Proteobacteria,1SDC8@1236|Gammaproteobacteria,3XPYT@561|Escherichia			N
GUT_GENOME000026_04464	750.76	Putative sugar-binding domain	sorC	TRUE	TRUE	COG2390@1|root,1Q5SS@1224|Proteobacteria,COG2390@2|Bacteria,1SZUN@1236|Gammaproteobacteria,3XRM9@561|Escherichia	1022		K	1	0.761905
GUT_GENOME000026_04560	714.844	Beta-ketoacyl synthase, N-terminal domain		FALSE	TRUE	COG0304@2|Bacteria,1P982@1224|Proteobacteria,1S9YX@1236|Gammaproteobacteria,COG0304@1|root,3XQQ7@561|Escherichia	789		I,Q	0	1
GUT_GENOME000026_04563	252	Carrier of the growing fatty acid chain in fatty acid biosynthesis	acpP2	FALSE	TRUE	COG0236@1|root,COG0236@2|Bacteria,1SC83@1236|Gammaproteobacteria,1N7Q1@1224|Proteobacteria,3XR7W@561|Escherichia	789		I,Q	0	1
GUT_GENOME000026_04568	422.545	Thioesterase-like superfamily		FALSE	TRUE	1S6BU@1236|Gammaproteobacteria,COG0824@1|root,1RH6W@1224|Proteobacteria,COG0824@2|Bacteria,3XQSG@561|Escherichia	789		I	0	1
GUT_GENOME000026_04570	2161.21	MMPL family	VP0886	FALSE	TRUE	COG4258@2|Bacteria,1MU1E@1224|Proteobacteria,COG4258@1|root,1RMP8@1236|Gammaproteobacteria,3XQAV@561|Escherichia	789		R	0	1
GUT_GENOME000026_04572	1114.09	Belongs to the beta-ketoacyl-ACP synthases family	fabF2	FALSE	TRUE	COG0304@2|Bacteria,COG0304@1|root,1RMPP@1236|Gammaproteobacteria,1N91E@1224|Proteobacteria	789		I,Q	0	1
GUT_GENOME000026_04574	728.866	KR domain	fabG	FALSE	TRUE	COG1028@2|Bacteria,COG1028@1|root,1RMCB@1236|Gammaproteobacteria,1MUPY@1224|Proteobacteria,3XQQA@561|Escherichia	789		I,Q	0	1
GUT_GENOME000026_04633	284.806	PAAR motif		FALSE	TRUE	COG4104@1|root,COG4104@2|Bacteria,1RI2B@1224|Proteobacteria,1S65G@1236|Gammaproteobacteria	967		U	0.105263	0.105263
GUT_GENOME000026_04675	410.197			TRUE	TRUE	32XIB@2|Bacteria,1SSN8@1236|Gammaproteobacteria,2E2DN@1|root,1MZHJ@1224|Proteobacteria
GUT_GENOME000026_04678	371.936			TRUE	TRUE	1NA43@1224|Proteobacteria,33360@2|Bacteria,2E8VR@1|root
GUT_GENOME000026_04681	305.982	Binds 16S rRNA, required for the assembly of 30S particles and may also be responsible for determining the conformation of the 16S rRNA at the A site	rpsN	TRUE	TRUE	1S62N@1236|Gammaproteobacteria,COG0199@1|root,1MZDT@1224|Proteobacteria,COG0199@2|Bacteria,3XPRV@561|Escherichia	2023		J	1	1
GUT_GENOME000026_04685	503.005			TRUE	TRUE	1SPZD@1236|Gammaproteobacteria,1NN3V@1224|Proteobacteria,2EN22@1|root,33FQ8@2|Bacteria
GUT_GENOME000026_04688	1310.2	The central subunit of the protein translocation channel SecYEG. Consists of two halves formed by TMs 1-5 and 6-10. These two domains form a lateral gate at the front which open onto the bilayer between TMs 2 and 7, and are clamped together by SecE at the back. The channel is closed by both a pore ring composed of hydrophobic SecY resides and a short helix (helix 2A) on the extracellular side of …	secY	TRUE	TRUE	1RNJV@1236|Gammaproteobacteria,COG0201@1|root,1MVU7@1224|Proteobacteria,COG0201@2|Bacteria,3XNT2@561|Escherichia			U
GUT_GENOME000026_04692	616.084	One of the primary rRNA binding proteins, it binds directly to 16S rRNA where it nucleates assembly of the body of the 30S subunit	rpsD	TRUE	TRUE	COG0522@1|root,1RQ38@1236|Gammaproteobacteria,1MW0U@1224|Proteobacteria,COG0522@2|Bacteria,3XNVS@561|Escherichia			J
GUT_GENOME000026_04705	541.754	DNA topological change	yrdD	TRUE	TRUE	COG0551@2|Bacteria,1MX2E@1224|Proteobacteria,1RQ85@1236|Gammaproteobacteria,COG0551@1|root,3XN35@561|Escherichia			L
GUT_GENOME000026_04708	257.973	Protein of unknown function (DUF1488)	yrdB	TRUE	TRUE	2E6QS@1|root,331AY@2|Bacteria,3XQ1C@561|Escherichia,1N7X6@1224|Proteobacteria,1SC8J@1236|Gammaproteobacteria
GUT_GENOME000026_04710	348.239	addiction module antidote protein		FALSE	TRUE	COG3636@2|Bacteria,1S97N@1236|Gammaproteobacteria,1N1JW@1224|Proteobacteria,COG3636@1|root	1301		K,X	0	1
GUT_GENOME000026_04767	870.498	Cobalamin synthesis protein cobW C-terminal domain		TRUE	FALSE	COG0523@1|root,1MVZV@1224|Proteobacteria,1RQDY@1236|Gammaproteobacteria,COG0523@2|Bacteria,3XR6U@561|Escherichia	811		R	0.0967742	0
GUT_GENOME000026_04799	228			FALSE	TRUE	1NHPU@1224|Proteobacteria,33ICR@2|Bacteria,2EQSY@1|root,1SGI1@1236|Gammaproteobacteria	2367			0	1
GUT_GENOME000026_04800	251.792			FALSE	TRUE	2ZWHZ@2|Bacteria,1P6D7@1224|Proteobacteria,299F6@1|root,1STWR@1236|Gammaproteobacteria	2350			0	0.333333
GUT_GENOME000027_00150	844.327	Fructose-bisphosphate aldolase class-II		TRUE	TRUE	1R5HG@1224|Proteobacteria,1RSQI@1236|Gammaproteobacteria,COG0191@1|root,COG0191@2|Bacteria	911		G,H	1	1
GUT_GENOME000027_00151	359.827	protein encoded in hypervariable junctions of pilus gene clusters	hicB	TRUE	FALSE	COG4226@1|root,1SAHX@1236|Gammaproteobacteria,1MZYR@1224|Proteobacteria,COG4226@2|Bacteria	2659		R	1	0
GUT_GENOME000027_00923	230.931			FALSE	TRUE	1PA4N@1224|Proteobacteria,2919T@1|root,1STW1@1236|Gammaproteobacteria,2ZNWU@2|Bacteria	594			0	1
GUT_GENOME000027_01291	514.681	Part of the multicomponent 3-phenylpropionate dioxygenase. Converts 3-phenylpropionic acid (PP) and cinnamic acid (CI) into 3-phenylpropionate-dihydrodiol (PP-dihydrodiol) and cinnamic acid-dihydrodiol (CI-dihydrodiol), respectively	hcaF	TRUE	TRUE	1T1EB@1236|Gammaproteobacteria,COG5517@1|root,COG5517@2|Bacteria,1RANS@1224|Proteobacteria	2693		Q	0.901099	0.901099
GUT_GENOME000027_01875	765.634	Sel1-like repeats.		TRUE	FALSE	1S6J7@1236|Gammaproteobacteria,COG0790@1|root,COG0790@2|Bacteria,1MYIN@1224|Proteobacteria	2522		R	1	0
GUT_GENOME000027_02013	405.741	Transcriptional regulator	hosA	TRUE	TRUE	1NM8R@1224|Proteobacteria,1S42F@1236|Gammaproteobacteria,COG1846@1|root,COG1846@2|Bacteria	2643		K	1	0.857143
GUT_GENOME000027_02191	292.122	InvH outer membrane lipoprotein	invH	FALSE	TRUE	3ZMGQ@590|Salmonella,31T59@2|Bacteria,2B0SW@1|root,1QQUQ@1224|Proteobacteria,1RTIK@1236|Gammaproteobacteria	2677			0.363636	0.727273
GUT_GENOME000027_02429	278.716	Excisionase-like protein		TRUE	FALSE	1NAJ4@1224|Proteobacteria,1T0SZ@1236|Gammaproteobacteria,2EE6R@1|root,3381A@2|Bacteria
GUT_GENOME000027_02949	540.249	transferase activity, transferring acyl groups	yjhQ	FALSE	TRUE	1RHPP@1224|Proteobacteria,COG3153@2|Bacteria,1RYJS@1236|Gammaproteobacteria,COG3153@1|root	418		R	0	1
GUT_GENOME000027_03142	1348.13	sodium ion transport		TRUE	TRUE	COG2211@2|Bacteria,1MVUM@1224|Proteobacteria,COG2211@1|root,3XN02@561|Escherichia,1RP5J@1236|Gammaproteobacteria	1419		G	1	1
GUT_GENOME000027_03388	1026.41	cell adhesion		TRUE	FALSE	COG3539@2|Bacteria,COG3539@1|root	2530		N,U	1	0
GUT_GENOME000027_03599	858.047	Phosphoadenosine phosphosulfate reductase family		FALSE	TRUE	4QATB@10239|Viruses,4QKU2@10699|Siphoviridae,4QVUZ@35237|dsDNA viruses no RNA stage,4QPGA@28883|Caudovirales	2330			0	0.25
GUT_GENOME000027_03651	627.621			TRUE	FALSE	2EIFS@1|root,1NKQT@1224|Proteobacteria,1SMB6@1236|Gammaproteobacteria,33C74@2|Bacteria	545			0.210526	0.105263
GUT_GENOME000027_03652	374.504	Mor transcription activator family		TRUE	TRUE	COG5566@2|Bacteria,COG5566@1|root,1N1UF@1224|Proteobacteria,3ZNE1@590|Salmonella,1TCVN@1236|Gammaproteobacteria	489		K,X	0.964286	0.892857
GUT_GENOME000027_03654	216			TRUE	FALSE	1NNUQ@1224|Proteobacteria,2CBEM@1|root,33NHY@2|Bacteria,1SGEA@1236|Gammaproteobacteria
GUT_GENOME000027_03656	681.796	Protein of unknown function (DUF2786)		TRUE	TRUE	3ZNBQ@590|Salmonella,1MZQ2@1224|Proteobacteria,1SABH@1236|Gammaproteobacteria,2CPPK@1|root,32SJJ@2|Bacteria	489			0.964286	0.892857
GUT_GENOME000027_03660	273			TRUE	TRUE	2ZWB1@2|Bacteria,2997S@1|root,1SW4A@1236|Gammaproteobacteria,1P8WR@1224|Proteobacteria	489			0.964286	0.892857
GUT_GENOME000027_03662	524.157	Bacteriophage Mu Gam like protein	gam	TRUE	TRUE	1S3XY@1236|Gammaproteobacteria,COG4396@1|root,3ZN9J@590|Salmonella,1REDK@1224|Proteobacteria,COG4396@2|Bacteria	489		X	0.964286	0.892857
GUT_GENOME000027_03664	1157.42	Type II secretory pathway component ExeA		TRUE	TRUE	1MU3G@1224|Proteobacteria,COG3267@2|Bacteria,1RMI0@1236|Gammaproteobacteria,COG3267@1|root	489		U,W	0.964286	0.892857
GUT_GENOME000027_03666	890.509			TRUE	TRUE	2Z7QA@2|Bacteria,28HDR@1|root,1RZ54@1236|Gammaproteobacteria,1PXQ9@1224|Proteobacteria	423			1	1
GUT_GENOME000027_03667	308.979	transcriptional regulator		TRUE	FALSE	1MYAJ@1224|Proteobacteria,1S7P9@1236|Gammaproteobacteria,COG1414@1|root,COG1414@2|Bacteria	505		K	1	0
GUT_GENOME000027_03669	413	Helix-turn-helix domain		TRUE	FALSE	1NI0H@1224|Proteobacteria,COG1396@1|root,COG1396@2|Bacteria			K
GUT_GENOME000027_03673	401.879			TRUE	FALSE	1SSPM@1236|Gammaproteobacteria,1P0D7@1224|Proteobacteria,347J0@2|Bacteria,2DY13@1|root	489			0.964286	0.892857
GUT_GENOME000027_03674	656.272			TRUE	TRUE		493			0.916667	0.916667
GUT_GENOME000027_03675	350.873	Putative 2/3 transmembrane domain holin		TRUE	TRUE	1S4JN@1236|Gammaproteobacteria,32ZT8@2|Bacteria,1NE2D@1224|Proteobacteria,2E4ZK@1|root,3ZND4@590|Salmonella	490			1	1
GUT_GENOME000027_03680	540.786	Protein of unknown function (DUF3486)		TRUE	FALSE	1R54Z@1224|Proteobacteria,1RQAZ@1236|Gammaproteobacteria,28J11@1|root,2Z8Y4@2|Bacteria	545			0.210526	0.105263
GUT_GENOME000027_03684	459	Phage virion morphogenesis family		TRUE	TRUE	COG5005@1|root,COG5005@2|Bacteria,1QDM2@1224|Proteobacteria,3ZNF1@590|Salmonella,1RTEW@1236|Gammaproteobacteria	489		X	0.964286	0.892857
GUT_GENOME000027_03686	945.688			TRUE	TRUE	1RZB1@1236|Gammaproteobacteria,1R5AY@1224|Proteobacteria,28H88@1|root,2Z7K7@2|Bacteria	489			0.964286	0.892857
GUT_GENOME000027_03689	464.474	Gp37 protein		TRUE	TRUE	1PS0M@1224|Proteobacteria,3ZNE0@590|Salmonella,1RTDB@1236|Gammaproteobacteria,2DHVF@1|root,3012R@2|Bacteria	493			0.916667	0.916667
GUT_GENOME000027_03690	252			TRUE	TRUE	2EG94@1|root,33A0W@2|Bacteria,1NGPN@1224|Proteobacteria,3ZNFP@590|Salmonella,1TCRA@1236|Gammaproteobacteria	489			0.964286	0.892857
GUT_GENOME000027_03691	1408.49	Phage tail sheath C-terminal domain		TRUE	TRUE	1RNUT@1236|Gammaproteobacteria,1MW1V@1224|Proteobacteria,COG3497@2|Bacteria,COG3497@1|root,3ZJI0@590|Salmonella	489		X	0.964286	0.892857
GUT_GENOME000027_03692	521.371	Phage tail tube protein FII		TRUE	TRUE	1MVR5@1224|Proteobacteria,COG3498@1|root,COG3498@2|Bacteria,3ZN0U@590|Salmonella,1SNUS@1236|Gammaproteobacteria	490		X	1	1
GUT_GENOME000027_03694	332.598	Phage tail assembly chaperone proteins, E, or 41 or 14		TRUE	TRUE	32W4B@2|Bacteria,2E0IR@1|root,1N0S3@1224|Proteobacteria,3ZNDQ@590|Salmonella,1TCPF@1236|Gammaproteobacteria	493			0.916667	0.916667
GUT_GENOME000027_03696	880.333	Phage P2 GpU		TRUE	TRUE	1R0FE@1224|Proteobacteria,1RYGQ@1236|Gammaproteobacteria,COG3499@1|root,COG3499@2|Bacteria	493		X	0.916667	0.916667
GUT_GENOME000027_03701	1089.96	Baseplate J-like protein	J	TRUE	TRUE	COG3948@2|Bacteria,COG3948@1|root,1MUFF@1224|Proteobacteria,1RNBJ@1236|Gammaproteobacteria,3ZMG0@590|Salmonella	489		X	0.964286	0.892857
GUT_GENOME000027_03990	546.017	3'-to-5' exoribonuclease specific for small oligoribonucleotides	orn	TRUE	TRUE	1S217@1236|Gammaproteobacteria,COG1949@2|Bacteria,1R9WX@1224|Proteobacteria,COG1949@1|root,3XMZQ@561|Escherichia			A
GUT_GENOME000027_04203	204	Domain of unknown function (DUF4224)		TRUE	FALSE	2VYPZ@28216|Betaproteobacteria,2EK4U@1|root,1NGNX@1224|Proteobacteria,33DV9@2|Bacteria	466			1	0
GUT_GENOME000027_04209	407.826	helix-turn-helix domain protein	dicA	FALSE	TRUE	COG1396@2|Bacteria,1N2U8@1224|Proteobacteria,1SBKZ@1236|Gammaproteobacteria,COG1396@1|root			K
GUT_GENOME000027_04237	927.708	Escherichia coli O157 H7 ortholog z1888		TRUE	TRUE	2Z8WK@2|Bacteria,2C57E@1|root,1RZPQ@1236|Gammaproteobacteria,1PPA2@1224|Proteobacteria,3XQQM@561|Escherichia	475			1	1
GUT_GENOME000027_04243	500.504	Phage DNA packaging protein Nu1		TRUE	FALSE	COG4220@1|root,COG4220@2|Bacteria,1RFQ1@1224|Proteobacteria,1S4F5@1236|Gammaproteobacteria,3XR11@561|Escherichia	486		L,X	1	0.833333
GUT_GENOME000027_04697	434.563	Antitoxin component of a type II toxin-antitoxin (TA) system. Functions as an mRNA interferase antitoxin	hicB	FALSE	TRUE	COG1598@2|Bacteria,COG1598@1|root,1RI8S@1224|Proteobacteria,3XPY0@561|Escherichia,1S7DJ@1236|Gammaproteobacteria	143		K,V	0	1
GUT_GENOME000036_04657	331.932	Toxic component of a toxin-antitoxin (TA) module	pemK	FALSE	TRUE	1RH4Z@1224|Proteobacteria,COG2337@1|root,COG2337@2|Bacteria,1S4NQ@1236|Gammaproteobacteria	444		T,V	0	1
GUT_GENOME000309_00846	911.986	Transcriptional	dsdC	TRUE	FALSE	1RNMN@1236|Gammaproteobacteria,COG0583@1|root,1MWY0@1224|Proteobacteria,COG0583@2|Bacteria,3XQ94@561|Escherichia	1126		K	1	0
GUT_GENOME000309_01570	1126.45	TPM domain		FALSE	TRUE	COG1512@1|root,COG1512@2|Bacteria,1TGDQ@1236|Gammaproteobacteria,1QIIW@1224|Proteobacteria,3XQPU@561|Escherichia	1060			0	1
GUT_GENOME000309_02435	3080.69	helicase		TRUE	TRUE	COG0553@1|root,1NC5H@1224|Proteobacteria,1RRXS@1236|Gammaproteobacteria,COG0553@2|Bacteria	529		K,L	0.25	0.25
GUT_GENOME000309_03133	705.412			TRUE	FALSE	3XQ5M@561|Escherichia,2Z7NC@2|Bacteria,2C7GS@1|root,1RY4H@1236|Gammaproteobacteria,1PMXS@1224|Proteobacteria	212			1	0
GUT_GENOME000309_03135	558.987	Ash protein family		TRUE	FALSE	32WIS@2|Bacteria,2E13C@1|root,1T1U2@1236|Gammaproteobacteria,1QUD0@1224|Proteobacteria,3XQ3Q@561|Escherichia	212			1	0
GUT_GENOME000309_03483	1808.27	ATP-dependent DNA helicase		TRUE	FALSE	COG0514@2|Bacteria,1MVGG@1224|Proteobacteria,COG0514@1|root,3XNKI@561|Escherichia,COG1040@1|root,1RMPG@1236|Gammaproteobacteria,COG1040@2|Bacteria	1308		L,R	1	0
GUT_GENOME000309_04129	278.547	RelE-like toxin of type II toxin-antitoxin system HigB		TRUE	TRUE	1MZ4I@1224|Proteobacteria,COG3549@1|root,3XR5C@561|Escherichia,1S9CP@1236|Gammaproteobacteria,COG3549@2|Bacteria	925		V	0.75	0.25
GUT_GENOME000309_04321	459.087	Inhibitor of vertebrate lysozyme (Ivy)		TRUE	TRUE	29IKC@1|root,305HJ@2|Bacteria,1QJ60@1224|Proteobacteria,3XNE1@561|Escherichia,1RPEI@1236|Gammaproteobacteria			O
GUT_GENOME000316_00092	1188.95	Mandelate racemase / muconate lactonizing enzyme, C-terminal domain		TRUE	FALSE	COG4948@2|Bacteria,COG4948@1|root,1RPIT@1236|Gammaproteobacteria,1MURK@1224|Proteobacteria,3ZN2X@590|Salmonella			M,R
GUT_GENOME000316_00094	695.353	FCD		TRUE	FALSE	1MW2A@1224|Proteobacteria,1SF2B@1236|Gammaproteobacteria,COG1802@2|Bacteria,COG1802@1|root			K
GUT_GENOME000316_00102	339.107	transcriptional regulator		TRUE	TRUE	COG0583@2|Bacteria,COG0583@1|root	2691		K	1	1
GUT_GENOME000316_00196	1286.47	AAA domain, putative AbiEii toxin, Type IV TA system		TRUE	FALSE	COG3950@2|Bacteria,COG3950@1|root	1351		R	0.181818	0
GUT_GENOME000316_00197	641.827	HNH endonuclease		TRUE	FALSE	COG1403@1|root,COG1403@2|Bacteria,1MYKW@1224|Proteobacteria,1SFHU@1236|Gammaproteobacteria	767		V	1	0
GUT_GENOME000316_00204	558.119	Part of the yfcOPQRSUV fimbrial operon. Could contribute to adhesion to various surfaces in specific environmental niches. Increases adhesion to eukaryotic T24 bladder epithelial cells in the absence of fim genes	yfcV	TRUE	FALSE	COG3539@1|root,1NDMB@1224|Proteobacteria,1SCDX@1236|Gammaproteobacteria,3XPZI@561|Escherichia,COG3539@2|Bacteria	941		N,U	0.942857	0.0285714
GUT_GENOME000316_00285	889.093	Involved in the heme biosynthesis. Catalyzes the aerobic oxidative decarboxylation of propionate groups of rings A and B of coproporphyrinogen-III to yield the vinyl groups in protoporphyrinogen-IX	hemF	TRUE	TRUE	1RMM8@1236|Gammaproteobacteria,COG0408@2|Bacteria,1MWMF@1224|Proteobacteria,COG0408@1|root,3XMMV@561|Escherichia			H
GUT_GENOME000316_00586	289.989	conserved small protein		TRUE	TRUE	1SAMC@1236|Gammaproteobacteria,COG5606@2|Bacteria,1NA3S@1224|Proteobacteria,COG5606@1|root	14		K,R	1	1
GUT_GENOME000316_00721	2194.68	Belongs to the glycosyl hydrolase 31 family	yicI	TRUE	TRUE	COG1501@2|Bacteria,1MWNJ@1224|Proteobacteria,1RMJ9@1236|Gammaproteobacteria,COG1501@1|root,3X0YK@547|Enterobacter	1326		G	1	1
GUT_GENOME000316_00811	915.35			TRUE	TRUE		1459			0.958333	1
GUT_GENOME000316_00814	1337	MutL protein		TRUE	TRUE	COG0849@1|root,1PPIT@1224|Proteobacteria,1TKEP@1236|Gammaproteobacteria,3XM3U@561|Escherichia,COG0849@2|Bacteria	1459		D	0.958333	1
GUT_GENOME000316_00815	1354.82	Catalyzes the carbon skeleton rearrangement of L- glutamate to L-threo-3-methylaspartate ((2S,3S)-3- methylaspartate)	glmE	TRUE	TRUE	COG4865@2|Bacteria,1RS7U@1236|Gammaproteobacteria,COG4865@1|root,1PCBW@1224|Proteobacteria,3XNUC@561|Escherichia	1459		E	0.958333	1
GUT_GENOME000316_00818	317.958	Domain of unknown function (DUF4387)		TRUE	TRUE	32RXZ@2|Bacteria,1S80A@1236|Gammaproteobacteria,1RKGY@1224|Proteobacteria,2CDKX@1|root,3XQ0V@561|Escherichia	1459			0.958333	1
GUT_GENOME000316_00862	357.771	COG2963 Transposase and inactivated derivatives		FALSE	TRUE	COG2963@2|Bacteria,COG2963@1|root,1SCWR@1236|Gammaproteobacteria,1N700@1224|Proteobacteria	1011		L,X	0	1
GUT_GENOME000316_00874	793.157	shikimate		TRUE	FALSE	COG0169@2|Bacteria,COG0169@1|root,1MY1Z@1224|Proteobacteria,1RRSP@1236|Gammaproteobacteria	1351		E	0.181818	0
GUT_GENOME000316_00885	758.913	nucleotidyltransferase		TRUE	FALSE	COG3541@2|Bacteria,1MYFT@1224|Proteobacteria,1RY9F@1236|Gammaproteobacteria,COG3541@1|root	2522		R	1	0
GUT_GENOME000316_00919	1067.62	protein homooligomerization	yjbI	TRUE	TRUE	COG1357@1|root,COG1357@2|Bacteria	2693			0.901099	0.901099
GUT_GENOME000316_00928	934.951	Protein of unknown function (DUF2713)	yjbM	TRUE	FALSE	1NTW1@1224|Proteobacteria,1SJIW@1236|Gammaproteobacteria,2DUZ3@1|root,33T3G@2|Bacteria	1351			0.181818	0
GUT_GENOME000316_01200	258.714	Protein of unknown function (DUF3343)		TRUE	TRUE	1SD2C@1236|Gammaproteobacteria,1N7MK@1224|Proteobacteria,32ZKF@2|Bacteria,2E4RX@1|root	291			1	1
GUT_GENOME000316_01629	1705.32	Protein of unknown function (DUF1524)		TRUE	FALSE	4NVEG@976|Bacteroidetes,1II9F@117743|Flavobacteriia,COG1479@2|Bacteria,COG1479@1|root	1288		V	0.2	0
GUT_GENOME000316_01910	1286.22	Outer membrane efflux protein		TRUE	TRUE	3XP4P@561|Escherichia,COG1538@1|root,1MYX2@1224|Proteobacteria,1RNX1@1236|Gammaproteobacteria,COG1538@2|Bacteria	1480		M,U	0.5	0.75
GUT_GENOME000316_01913	1108.18	HlyD membrane-fusion protein of T1SS		TRUE	TRUE	1MUI8@1224|Proteobacteria,1RNK4@1236|Gammaproteobacteria,COG0845@2|Bacteria,3XNH1@561|Escherichia,COG0845@1|root	1485		M,V	0.2	0.866667
GUT_GENOME000316_01917	989.035	YadA-like membrane anchor domain		TRUE	FALSE	1SBVV@1236|Gammaproteobacteria,1N22I@1224|Proteobacteria,3XQS7@561|Escherichia,COG5295@1|root,COG5295@2|Bacteria	1324		U,W	1	0
GUT_GENOME000316_01918	360.412			TRUE	TRUE	1TGFW@1236|Gammaproteobacteria,1QIKV@1224|Proteobacteria,2AV1A@1|root,31KR4@2|Bacteria,3XQYD@561|Escherichia	1449			1	1
GUT_GENOME000316_02381	447.395			TRUE	FALSE	3X41T@547|Enterobacter,1N0V8@1224|Proteobacteria,1S9TD@1236|Gammaproteobacteria,2DMM7@1|root,32SCN@2|Bacteria	1329			1	0
GUT_GENOME000316_02655	599.449	cell adhesion		TRUE	TRUE	COG3539@1|root,COG3539@2|Bacteria,1NEKI@1224|Proteobacteria,1SDNQ@1236|Gammaproteobacteria	2693		N,U	0.901099	0.901099
GUT_GENOME000316_02657	669.561	fimbrial chaperone	yehC	TRUE	TRUE	COG3121@2|Bacteria,COG3121@1|root,1R6JB@1224|Proteobacteria,3XNUS@561|Escherichia,1RRS0@1236|Gammaproteobacteria	1447		N,U,W	1	0.5
GUT_GENOME000316_02658	531.317	Part of the yehABCD fimbrial operon. Could contribute to adhesion to various surfaces in specific environmental niches	yehD	TRUE	FALSE	COG3539@1|root,1SFKQ@1236|Gammaproteobacteria,1N9MK@1224|Proteobacteria,COG3539@2|Bacteria,3XQ6D@561|Escherichia	1447		N,U	1	0.5
GUT_GENOME000316_02896	317.908	Cytotoxic translational repressor of toxin-antitoxin stability system		TRUE	FALSE	1N7N5@1224|Proteobacteria,COG4737@2|Bacteria,1S3WA@1236|Gammaproteobacteria,COG4737@1|root,3XR3G@561|Escherichia	2490			1	0
GUT_GENOME000316_02897	296.757	Helix-turn-helix domain		TRUE	FALSE	3XPUV@561|Escherichia,COG2944@1|root,1S7SR@1236|Gammaproteobacteria,COG2944@2|Bacteria,1N155@1224|Proteobacteria	2490		K	1	0
GUT_GENOME000316_02921	960.221	phosphate ion binding	sphX	TRUE	FALSE	COG0226@1|root,COG0226@2|Bacteria	1351		P	0.181818	0
GUT_GENOME000316_02979	1287.87	Domain of unknown function (DUF4049)		TRUE	TRUE	1NU0X@1224|Proteobacteria,1SKUI@1236|Gammaproteobacteria,33S2G@2|Bacteria,2F0JS@1|root	2693			0.901099	0.901099
GUT_GENOME000316_03050	721.196	Protein of unknown function (DUF1627)		TRUE	FALSE	COG1846@1|root,COG1846@2|Bacteria,1SBWV@1236|Gammaproteobacteria,1N4M1@1224|Proteobacteria,3XQK0@561|Escherichia	2253		K	0.8	0
GUT_GENOME000316_03272	233.943			TRUE	TRUE	34695@2|Bacteria,2FE99@1|root
GUT_GENOME000316_03357	248.989			TRUE	TRUE		1574			0.964286	0.642857
GUT_GENOME000316_03361	995.556			TRUE	FALSE	1MZGW@1224|Proteobacteria,32S2Z@2|Bacteria,2BX94@1|root,1S6XN@1236|Gammaproteobacteria	1575			0.911111	0.0222222
GUT_GENOME000316_03366	1055.74			TRUE	FALSE	4QQZT@28883|Caudovirales,4QYP9@35237|dsDNA viruses no RNA stage,4QIQQ@10662|Myoviridae,4QFE9@10239|Viruses	1573			0.8	0
GUT_GENOME000316_03372	441.63	LydA-holin antagonist		TRUE	FALSE	2AUYJ@1|root,1QIHS@1224|Proteobacteria,1TGCF@1236|Gammaproteobacteria,31KN4@2|Bacteria,3W1W1@53335|Pantoea	1575			0.911111	0.0222222
GUT_GENOME000316_03378	434.898			TRUE	FALSE	2AJRS@1|root,31ADY@2|Bacteria,3W1K7@53335|Pantoea,1QFXR@1224|Proteobacteria,1TD94@1236|Gammaproteobacteria	1575			0.911111	0.0222222
GUT_GENOME000316_03379	824.362			TRUE	FALSE	1QMJ9@1224|Proteobacteria,1TJUQ@1236|Gammaproteobacteria,31PWG@2|Bacteria,2AXV8@1|root,1Y1Q4@135623|Vibrionales	1575			0.911111	0.0222222
GUT_GENOME000316_03380	1413.87			TRUE	FALSE	2DC1A@1|root,1RBD4@1224|Proteobacteria,2ZCD5@2|Bacteria	1575			0.911111	0.0222222
GUT_GENOME000316_03381	354.859			TRUE	FALSE	1TGFB@1236|Gammaproteobacteria,2AV0P@1|root,31KQI@2|Bacteria,3W288@53335|Pantoea,1QIK9@1224|Proteobacteria	1575			0.911111	0.0222222
GUT_GENOME000316_03383	869.851			TRUE	FALSE	2BH9S@1|root,1QIIE@1224|Proteobacteria,1TGD6@1236|Gammaproteobacteria,3W1YS@53335|Pantoea,32BB8@2|Bacteria	1575			0.911111	0.0222222
GUT_GENOME000316_03391	778.364	DNA binding		TRUE	FALSE	4QAPV@10239|Viruses,4QINS@10662|Myoviridae,4QPC3@28883|Caudovirales,4QV7H@35237|dsDNA viruses no RNA stage	1574			0.964286	0.642857
GUT_GENOME000316_03397	809.633			TRUE	FALSE	2B11B@1|root,1MYGN@1224|Proteobacteria,31TEP@2|Bacteria	1574			0.964286	0.642857
GUT_GENOME000316_03399	1589.85			TRUE	TRUE	1RFWS@1224|Proteobacteria,30YCV@2|Bacteria,2CJX6@1|root	1574			0.964286	0.642857
GUT_GENOME000316_03404	390.205			TRUE	TRUE	1S890@1236|Gammaproteobacteria,1RKWU@1224|Proteobacteria,31582@2|Bacteria,2AF8X@1|root	1574			0.964286	0.642857
GUT_GENOME000316_03417	1305.22	DNA helicase activity		TRUE	FALSE	4QI76@10662|Myoviridae,4QPII@28883|Caudovirales,4QAWG@10239|Viruses,4QV6X@35237|dsDNA viruses no RNA stage	1575			0.911111	0.0222222
GUT_GENOME000316_03420	992.786			TRUE	FALSE	1QII5@1224|Proteobacteria,1TGCX@1236|Gammaproteobacteria,2AUZ0@1|root,31KNJ@2|Bacteria,3W1XF@53335|Pantoea	1575			0.911111	0.0222222
GUT_GENOME000316_03422	713.139			TRUE	FALSE	2AUXV@1|root,1TGBI@1236|Gammaproteobacteria,31KMC@2|Bacteria,3W1QM@53335|Pantoea,1QIGZ@1224|Proteobacteria	1575			0.911111	0.0222222
GUT_GENOME000316_03425	246			TRUE	FALSE	2EJT5@1|root,33DHS@2|Bacteria,1NJHJ@1224|Proteobacteria,1SITY@1236|Gammaproteobacteria	1575			0.911111	0.0222222
GUT_GENOME000316_03428	619.86			TRUE	FALSE	2F43Z@1|root,1SPFW@1236|Gammaproteobacteria,1NWW6@1224|Proteobacteria,33WVF@2|Bacteria	1575			0.911111	0.0222222
GUT_GENOME000316_03432	1151.3			TRUE	FALSE	2F012@1|root,33T4X@2|Bacteria,1NRPC@1224|Proteobacteria,1SMZD@1236|Gammaproteobacteria	1575			0.911111	0.0222222
GUT_GENOME000316_03453	380.425	Fic/DOC family		TRUE	TRUE	COG3654@1|root,COG3654@2|Bacteria,1MTXZ@122277|Pectobacterium,1SXWM@1236|Gammaproteobacteria,1PRPP@1224|Proteobacteria	1565		X	1	1
GUT_GENOME000316_03456	447.897			TRUE	TRUE	3W2AU@53335|Pantoea,31MVY@2|Bacteria,2AW1C@1|root,1TGGB@1236|Gammaproteobacteria,1QIM9@1224|Proteobacteria	1574			0.964286	0.642857
GUT_GENOME000316_03459	843.285			TRUE	TRUE	2AV07@1|root,3W267@53335|Pantoea,31KQ1@2|Bacteria,1QIJR@1224|Proteobacteria,1TGES@1236|Gammaproteobacteria	1574			0.964286	0.642857
GUT_GENOME000316_03460	209.99			FALSE	TRUE		1574			0.964286	0.642857
GUT_GENOME000316_03474	850.422	X-Pro dipeptidyl-peptidase (S15 family)		TRUE	FALSE	COG1073@2|Bacteria,1RYPS@1236|Gammaproteobacteria,1MUCD@1224|Proteobacteria,COG1073@1|root	603		T	1	0
GUT_GENOME000316_03533	965.153	Belongs to the ParB family	sopB	FALSE	TRUE	COG1475@2|Bacteria,1NGXR@1224|Proteobacteria,COG1475@1|root	1667		D,K	0	1
GUT_GENOME000316_03565	395.319			TRUE	TRUE	3XR6K@561|Escherichia,319CV@2|Bacteria,2AIVJ@1|root,1TCI3@1236|Gammaproteobacteria,1QFBK@1224|Proteobacteria	1313			0.25	0.0833333
GUT_GENOME000316_03700	1004.33	cell adhesion		FALSE	TRUE	COG3539@2|Bacteria,COG3539@1|root	1333		N,U	0.5	0.5
GUT_GENOME000316_03762	323.654	Helix-turn-helix domain	higA-2	TRUE	TRUE	COG2944@2|Bacteria,COG2944@1|root,3X3XF@547|Enterobacter,1S4N2@1236|Gammaproteobacteria,1N05Y@1224|Proteobacteria	1452		K	1	1
GUT_GENOME000316_03957	342			TRUE	FALSE	1P0BZ@1224|Proteobacteria,2FJFN@1|root,1SSCP@1236|Gammaproteobacteria,34B59@2|Bacteria,3W2JU@53335|Pantoea
GUT_GENOME000316_03958	213	Transcriptional regulatory protein, C terminal		TRUE	FALSE	1MX98@1224|Proteobacteria,1RNZ6@1236|Gammaproteobacteria,COG0745@1|root,COG0745@2|Bacteria,3WWJE@544|Citrobacter	811		K,T	0.0967742	0
GUT_GENOME000316_04171	657.823	Catalyzes the 2'-O methylation of guanosine at position 18 in tRNA	trmH	TRUE	TRUE	3XNPH@561|Escherichia,COG0566@2|Bacteria,COG0566@1|root,1MWBE@1224|Proteobacteria,1RMPR@1236|Gammaproteobacteria			J
GUT_GENOME000316_04252	408.193	HicB_like antitoxin of bacterial toxin-antitoxin system		FALSE	TRUE	COG0864@2|Bacteria,COG1598@1|root,COG1598@2|Bacteria,COG0864@1|root,3XR99@561|Escherichia,1TBC0@1236|Gammaproteobacteria,1PUAC@1224|Proteobacteria	1454		K,V	0.333333	0.666667
GUT_GENOME000316_04595	299.269		yicS	TRUE	TRUE	3XQ5W@561|Escherichia,1N3XB@1224|Proteobacteria,2D8BC@1|root,1SAN1@1236|Gammaproteobacteria,32TQY@2|Bacteria	1152			1	1
GUT_GENOME000316_04597	1713.37			TRUE	TRUE		1459			0.958333	1
GUT_GENOME000316_04600	1580.04	Invasion protein	hilA	TRUE	TRUE	COG3710@1|root,1S6EI@1236|Gammaproteobacteria,1PDUY@1224|Proteobacteria,COG0457@1|root,COG0457@2|Bacteria,COG3710@2|Bacteria	1459		K,R	0.958333	1
GUT_GENOME000316_04608	731.734	Induces the synthesis of acid phosphatase (AppA) and several other polypeptides (such as AppBC) during the deceleration phase of growth. It also acts as a transcriptional repressor for one group of proteins that are synthesized preferentially in exponential growth and for one group synthesized only in the stationary phase. Also involved in the stabilization of the sigma stress factor RpoS during …	ureR	FALSE	TRUE	1RPD4@1236|Gammaproteobacteria,1Q19X@1224|Proteobacteria,COG2207@1|root,COG2207@2|Bacteria	1265		K	0	1
GUT_GENOME000316_04680	696.216	Phage integrase family		TRUE	TRUE	1R8ME@1224|Proteobacteria,1RZMH@1236|Gammaproteobacteria,COG0582@1|root,COG0582@2|Bacteria,3XPF5@561|Escherichia	577		L,X	0.666667	1
GUT_GENOME000316_04709	279	transposase	yhhI	FALSE	TRUE	1MXB5@1224|Proteobacteria,1RSAV@1236|Gammaproteobacteria,3XQUD@561|Escherichia,COG5433@1|root,COG5433@2|Bacteria	2039		L,X	0	1
GUT_GENOME000317_00585	505.157	Component of the SOS system and an inhibitor of cell division. Accumulation of SulA causes rapid cessation of cell division and the appearance of long, non-septate filaments. In the presence of GTP, binds a polymerization-competent form of FtsZ in a 1 1 ratio, thus inhibiting FtsZ polymerization and therefore preventing it from participating in the assembly of the Z ring. This mechanism prevents …	sulA	TRUE	TRUE	3XMSR@561|Escherichia,1RYWE@1236|Gammaproteobacteria,1RD22@1224|Proteobacteria,COG5404@2|Bacteria,COG5404@1|root	2017		D	1	1
GUT_GENOME000317_01403	278.657			TRUE	FALSE	1TGGR@1236|Gammaproteobacteria,2AV21@1|root,1QIMJ@1224|Proteobacteria,31KRW@2|Bacteria,3XR0J@561|Escherichia	468			1	0
GUT_GENOME000317_01422	892.037	Belongs to the 'phage' integrase family	intB	FALSE	TRUE	1MU23@1224|Proteobacteria,1RMJ1@1236|Gammaproteobacteria,COG0582@1|root,COG0582@2|Bacteria,3XN9B@561|Escherichia	783		L,X	0	1
GUT_GENOME000317_02544	1646.7	signal transduction protein with Nacht domain		TRUE	FALSE	COG5635@2|Bacteria,1RDAH@1224|Proteobacteria,1SN8A@1236|Gammaproteobacteria,COG5635@1|root			T
GUT_GENOME000317_03269	272.989			TRUE	TRUE		687			1	1
GUT_GENOME000317_03361	1526.46	The M and S subunits together form a methyltransferase (MTase) that methylates two adenine residues in complementary strands of a bipartite DNA recognition sequence. In the presence of the R subunit the complex can also act as an endonuclease, binding to the same target sequence but cutting the DNA some distance from this site. Whether the DNA is cut or modified depends on the methylation state o…	hsdM	FALSE	TRUE	1RRVF@1236|Gammaproteobacteria,COG0286@1|root,COG0286@2|Bacteria,1MW3A@1224|Proteobacteria,3XQFP@561|Escherichia	2151		L,V	0	1
GUT_GENOME000317_03524	320.517	Phage derived protein Gp49-like (DUF891)		TRUE	TRUE	1S8WB@1236|Gammaproteobacteria,COG4679@2|Bacteria,1MZC9@1224|Proteobacteria,COG4679@1|root	14		X	1	1
GUT_GENOME000317_04860	1456	Alpha beta hydrolase		TRUE	FALSE	COG0596@2|Bacteria,1R6KU@1224|Proteobacteria,1RNTQ@1236|Gammaproteobacteria,COG0596@1|root	1588		H,I,R	1	0
GUT_GENOME000489_01294	1222.61	Catalyzes the phosphorylation of methylthioribose into methylthioribose-1-phosphate	mtnK	FALSE	TRUE	COG4857@2|Bacteria,COG4857@1|root,1RMDV@1236|Gammaproteobacteria,1MXBW@1224|Proteobacteria	414		E,F	0	1
GUT_GENOME000489_01296	590.82	Catalyzes the cleavage of L-fuculose 1-phosphate to glycerone phosphate and L-lactaldehyde	fucA	FALSE	TRUE	COG0235@1|root,3WVBJ@544|Citrobacter,1RPIK@1236|Gammaproteobacteria,1MW7B@1224|Proteobacteria,COG0235@2|Bacteria	418		E,G	0	1
GUT_GENOME000489_01297	929.325	Ureide permease		FALSE	TRUE	COG4975@2|Bacteria,1R7PI@1224|Proteobacteria,1RYNY@1236|Gammaproteobacteria,COG4975@1|root	418		G	0	1
GUT_GENOME000489_01299	1327.34	gluconate transporter	yjhF	FALSE	TRUE	COG2610@1|root,1RNGE@1236|Gammaproteobacteria,COG2610@2|Bacteria,1MUFG@1224|Proteobacteria,3XNJE@561|Escherichia	418		G,P	0	1
GUT_GENOME000489_01300	1912.46	Catalyzes the dehydration of D-xylonic acid to form 2- dehydro-3-deoxy-D-pentonate	yjhG	FALSE	TRUE	1RPTZ@1236|Gammaproteobacteria,1R4QF@1224|Proteobacteria,COG0129@2|Bacteria,COG0129@1|root,3XRJM@561|Escherichia	418		E,G	0	1
GUT_GENOME000489_01301	940.211	Catalyze the formation of 2-keto-3-deoxy-gluconate (KDG) from pyruvate and glyceraldehyde. May also function as a 2-dehydro-3-deoxy-D-pentonate aldolase. Overexpression leads to increased growth (over 2 hours) in the presence of the antibiotics norfloxacin, ampicillin and streptomycin	yjhH	FALSE	TRUE	COG0329@1|root,1RPXI@1236|Gammaproteobacteria,1MXI1@1224|Proteobacteria,COG0329@2|Bacteria,3XQAY@561|Escherichia	418		E,M	0	1
GUT_GENOME000489_01302	781.864	negative regulation of nucleic acid-templated transcription	yjhI	FALSE	TRUE	3XRJX@561|Escherichia,1S144@1236|Gammaproteobacteria,COG1414@1|root,1R3KG@1224|Proteobacteria,COG1414@2|Bacteria	418		K	0	1
GUT_GENOME000489_01309	1096.17	Has a broad aminopeptidase activity on non-blocked peptides by progressively cleaving amino acids off the peptide substrate. Aminopeptidase activity stops at the residue before the first proline in the peptide. Cannot cleave when proline is the first N-terminal residue	sgcX	FALSE	TRUE	1MXEU@1224|Proteobacteria,3XN5P@561|Escherichia,1RYRZ@1236|Gammaproteobacteria,COG1363@2|Bacteria,COG1363@1|root	418		E,G	0	1
GUT_GENOME000489_01633	335.854	Inhibits RpoS proteolysis by regulating RssB activity, thereby increasing the stability of the sigma stress factor RpoS during magnesium starvation	iraM	TRUE	TRUE	1NBRF@1224|Proteobacteria,1SDBJ@1236|Gammaproteobacteria,2E777@1|root,3XR6J@561|Escherichia,331R2@2|Bacteria	478		K	1	1
GUT_GENOME000489_02306	1355.49	YadA-like membrane anchor domain		FALSE	TRUE	1N22I@1224|Proteobacteria,1SBVV@1236|Gammaproteobacteria,COG5295@2|Bacteria,COG5295@1|root,3XQS7@561|Escherichia	1488		U,W	0	1
GUT_GENOME000489_02725	417.944	Antitoxin component of a type II toxin-antitoxin (TA) system. Functions as an mRNA interferase antitoxin	higA	TRUE	TRUE	COG5499@2|Bacteria,COG5499@1|root,3XQ7G@561|Escherichia,1S260@1236|Gammaproteobacteria,1RBYR@1224|Proteobacteria	1903		K,V	1	1
GUT_GENOME000489_03535	282			FALSE	TRUE
GUT_GENOME000489_03537	939.601	transfer protein		FALSE	TRUE	2Z8UB@2|Bacteria,1N1QM@1224|Proteobacteria,1RR0J@1236|Gammaproteobacteria,28IW1@1|root
GUT_GENOME000489_03563	1075.16	Type II secretion system (T2SS), protein F		FALSE	TRUE	COG1459@1|root,COG1459@2|Bacteria,1RAQ3@1224|Proteobacteria,1RQQ4@1236|Gammaproteobacteria			N,U,W
GUT_GENOME000489_03564	1459.47	Type II/IV secretion system protein	pilQ	FALSE	TRUE	1R9U0@1224|Proteobacteria,1RSBE@1236|Gammaproteobacteria,282XD@191675|unclassified Enterobacteriaceae,COG2804@1|root,COG2804@2|Bacteria			N,U,W
GUT_GENOME000489_03752	813.021	Domain of unknown function (DUF4123)		FALSE	TRUE	1RGJ9@1224|Proteobacteria,1S4XI@1236|Gammaproteobacteria,2BYYW@1|root,32R43@2|Bacteria
GUT_GENOME000489_04273	634.013	NAD(P)H-binding		FALSE	TRUE	1RY6N@1236|Gammaproteobacteria,1MVBE@1224|Proteobacteria,COG0702@1|root,COG0702@2|Bacteria	273		G,M,R	0	1
GUT_GENOME000489_04307	1098.27	Belongs to the membrane fusion protein (MFP) (TC 8.A.1) family	mexA	TRUE	FALSE	3XPDT@561|Escherichia,COG0845@2|Bacteria,COG0845@1|root,1RPI1@1236|Gammaproteobacteria,1MU78@1224|Proteobacteria	1022		M,V	1	0.761905
GUT_GENOME000489_04342	297			TRUE	FALSE	2EDVK@1|root,1NBCU@1224|Proteobacteria,1SSWY@1236|Gammaproteobacteria,337QQ@2|Bacteria,3XR3M@561|Escherichia
GUT_GENOME000489_04450	1117.4			FALSE	TRUE	32UEJ@2|Bacteria,2DK81@1|root,1SBTU@1236|Gammaproteobacteria,1N5P5@1224|Proteobacteria	623			0.5	0.5
GUT_GENOME000489_04459	276			TRUE	FALSE	2ER0M@1|root,33IK6@2|Bacteria,1SHSS@1236|Gammaproteobacteria,1NPYG@1224|Proteobacteria	339			0.75	0
GUT_GENOME000489_04460	643.757	VirC1 protein		TRUE	FALSE	COG1192@1|root,COG1192@2|Bacteria,1RMZN@1236|Gammaproteobacteria,1MWRE@1224|Proteobacteria,3X2P1@547|Enterobacter	339		D,N	0.75	0
GUT_GENOME000489_04461	959.83	StbA protein	stbA	TRUE	FALSE	COG0443@2|Bacteria,1R4I4@1224|Proteobacteria,1RRY4@1236|Gammaproteobacteria,COG0443@1|root,3WYFY@544|Citrobacter	339		O	0.75	0
GUT_GENOME000489_04467	509.766	Protein of unknown function (DUF1706)		TRUE	FALSE	COG4283@2|Bacteria,COG4283@1|root,1REKU@1224|Proteobacteria,1S4V0@1236|Gammaproteobacteria	615		R	0.5	0
GUT_GENOME000489_04468	1017.68	Transposase		TRUE	FALSE	COG3464@2|Bacteria,3WZBE@544|Citrobacter,1RQQA@1236|Gammaproteobacteria,1MV5J@1224|Proteobacteria,COG3464@1|root	616		L,X	1	0
GUT_GENOME000489_04518	322.681			TRUE	TRUE		627			1	1
GUT_GENOME000489_04536	261	Replication regulatory protein RepB		TRUE	FALSE	1NB02@1224|Proteobacteria,1SCJY@1236|Gammaproteobacteria,2EAHA@1|root,334KG@2|Bacteria,41HPH@629|Yersinia	344			1	0
GUT_GENOME000489_04541	752.935	NQR complex catalyzes the reduction of ubiquinone-1 to ubiquinol by two successive reactions, coupled with the transport of Na( ) ions from the cytoplasm to the periplasm. NqrA to NqrE are probably involved in the second step, the conversion of ubisemiquinone to ubiquinol	nqrC	TRUE	TRUE	1RR85@1236|Gammaproteobacteria,1MVDI@1224|Proteobacteria,COG2869@1|root,COG2869@2|Bacteria,3WWQ3@544|Citrobacter	624		C	1	0.769231
GUT_GENOME000489_04542	1874.2	Iron permease FTR1 family	efeU_1	TRUE	TRUE	3WY6C@544|Citrobacter,COG0672@1|root,COG0672@2|Bacteria,1RMWB@1236|Gammaproteobacteria,1MXHM@1224|Proteobacteria	624		P	1	0.769231
GUT_GENOME000489_04543	524.419	Fe2+ transport protein	tpd	TRUE	TRUE	COG3470@2|Bacteria,1RA2Z@1224|Proteobacteria,COG3470@1|root,1RS32@1236|Gammaproteobacteria,3WXTT@544|Citrobacter	624		I,M,P	1	0.769231
GUT_GENOME000489_04544	1325.51	Predicted membrane protein (DUF2318)		TRUE	TRUE	3WX3W@544|Citrobacter,COG3350@1|root,COG3350@2|Bacteria,COG4393@1|root,COG4393@2|Bacteria,1R507@1224|Proteobacteria,1RQ63@1236|Gammaproteobacteria	624		P	1	0.769231
GUT_GENOME000489_04545	1251.23	MacB-like periplasmic core domain	macB_3	TRUE	TRUE	1PU2M@1224|Proteobacteria,COG0577@1|root,1RSJG@1236|Gammaproteobacteria,COG0577@2|Bacteria,3WWZY@544|Citrobacter	624		V	1	0.769231
GUT_GENOME000489_04547	687.891	ATPases associated with a variety of cellular activities	macB_2	TRUE	TRUE	1RQIZ@1236|Gammaproteobacteria,1Q3QX@1224|Proteobacteria,COG1136@1|root,COG1136@2|Bacteria,3WWT0@544|Citrobacter	624		M,V	1	0.769231
GUT_GENOME000489_04548	483.267	Thioredoxin-like	resA	TRUE	TRUE	COG0526@1|root,COG0526@2|Bacteria,1RCTX@1224|Proteobacteria,1S4XW@1236|Gammaproteobacteria,3WYCY@544|Citrobacter	624		C,O	1	0.769231
GUT_GENOME000489_04549	484.643			TRUE	TRUE	3WYAH@544|Citrobacter,2BT38@1|root,1TKND@1236|Gammaproteobacteria,1QN6W@1224|Proteobacteria,32N7S@2|Bacteria	624			1	0.769231
GUT_GENOME000489_04840	1560.53	membrane protein of prophage CP-933X Escherichia coli O157 H7 EDL933		TRUE	FALSE	1QWXK@1224|Proteobacteria,COG3064@2|Bacteria,1SJA4@1236|Gammaproteobacteria,COG3064@1|root	468		M	1	0
GUT_GENOME000489_05001	328.751	Phage minor tail protein		TRUE	TRUE	1SCEF@1236|Gammaproteobacteria,1N8H3@1224|Proteobacteria,COG4718@1|root,3XQ54@561|Escherichia,COG4718@2|Bacteria	486		X	1	0.833333
GUT_GENOME000489_05008	281.337	ATP-binding sugar transporter from pro-phage		TRUE	FALSE	4QDQE@10239|Viruses,4QXYB@35237|dsDNA viruses no RNA stage,4QTNQ@28883|Caudovirales
GUT_GENOME000489_05014	475.11	Protein of unknown function (DUF1441)		TRUE	FALSE	2ZB20@2|Bacteria,28MTZ@1|root,1R7DT@1224|Proteobacteria,1S1TV@1236|Gammaproteobacteria
GUT_GENOME000489_05015	213			TRUE	FALSE	1NHBM@1224|Proteobacteria,33KP9@2|Bacteria,2ET56@1|root,1SUC6@1236|Gammaproteobacteria
GUT_GENOME000489_05020	315			TRUE	FALSE
GUT_GENOME000489_05029	213			TRUE	FALSE	2E875@1|root,3ZNE9@590|Salmonella,303Z1@2|Bacteria,1RTN8@1236|Gammaproteobacteria,1QQXJ@1224|Proteobacteria
GUT_GENOME000489_05050	1836.04	Colicin I receptor	fepA	TRUE	FALSE	1MUC1@1224|Proteobacteria,COG1629@1|root,1RNHR@1236|Gammaproteobacteria,3XM4N@561|Escherichia,COG4771@2|Bacteria	496		P	1	0.666667
GUT_GENOME000489_05051	242.94			TRUE	TRUE		915			0.8	0.8
GUT_GENOME000489_05053	215.926			TRUE	TRUE	1SIRX@1236|Gammaproteobacteria,2EGZD@1|root,33ARG@2|Bacteria,1NPCY@1224|Proteobacteria	913			1	1
GUT_GENOME000489_05063	2430.03	Type V secretory pathway, adhesin AidA	Z012_09305	TRUE	TRUE	COG3468@2|Bacteria,COG3468@1|root,1RSBS@1236|Gammaproteobacteria,1QIU6@1224|Proteobacteria	496		M,U	1	0.666667
GUT_GENOME000489_05064	246	Receptor	iutA	TRUE	TRUE	1QTSS@1224|Proteobacteria,1T1G0@1236|Gammaproteobacteria,COG4206@1|root,COG4206@2|Bacteria	496		H	1	0.666667
GUT_GENOME000489_05145	330.745	Colicin E1 (microcin) immunity protein		TRUE	FALSE	33CZP@2|Bacteria,2CF24@1|root,1SIBF@1236|Gammaproteobacteria,1NJV1@1224|Proteobacteria	855			1	0
GUT_GENOME000489_05151	2203.56	TonB dependent receptor		TRUE	FALSE	1T2FC@1236|Gammaproteobacteria,1QUJE@1224|Proteobacteria,COG4774@2|Bacteria,COG4774@1|root	624		P	1	0.769231
GUT_GENOME000489_05193	795.471	EamA-like transporter family		TRUE	FALSE	COG0697@2|Bacteria,COG0697@1|root,1N1QZ@1224|Proteobacteria	76		E,G,R	1	0
GUT_GENOME000489_05196	207			TRUE	FALSE		76			1	0
GUT_GENOME000533_03947	209.052			TRUE	FALSE
GUT_GENOME000533_04423	258	Replication regulatory protein RepB		FALSE	TRUE	1NB02@1224|Proteobacteria,1SCJY@1236|Gammaproteobacteria,2EAHA@1|root,334KG@2|Bacteria	2065			0	0.333333
GUT_GENOME000533_04440	342.497			TRUE	TRUE		627			1	1
GUT_GENOME000616_00230	564.371	Part of the yfcOPQRSUV fimbrial operon. Could contribute to adhesion to various surfaces in specific environmental niches. Increases adhesion to eukaryotic T24 bladder epithelial cells in the absence of fim genes	yfcV	FALSE	TRUE	COG3539@1|root,1NDMB@1224|Proteobacteria,COG3539@2|Bacteria,3XPZI@561|Escherichia,1SCDX@1236|Gammaproteobacteria	1481		N,U	0	0.428571
GUT_GENOME000616_00231	2205.24	outer membrane usher protein	yfcU	FALSE	TRUE	1P744@1224|Proteobacteria,1RN8Z@1236|Gammaproteobacteria,COG3188@1|root,COG3188@2|Bacteria,3XMH0@561|Escherichia	1481		N,U,W	0	0.428571
GUT_GENOME000616_00232	739.469	Part of the yfcOPQRSUV fimbrial operon. Could contribute to adhesion to various surfaces in specific environmental niches. Increases adhesion to eukaryotic T24 bladder epithelial cells in the absence of fim genes	yfcS	FALSE	TRUE	COG3121@1|root,3XQKN@561|Escherichia,1SKBU@1236|Gammaproteobacteria,1NSX3@1224|Proteobacteria,COG3121@2|Bacteria	1481		M,W	0	0.428571
GUT_GENOME000616_01372	515.638	Lipocalin-like domain	blc	FALSE	TRUE	COG3040@1|root,1RDAI@1224|Proteobacteria,1S3PW@1236|Gammaproteobacteria,COG3040@2|Bacteria,3XQF6@561|Escherichia	1455		M	0	0.666667
GUT_GENOME000616_01841	571.987	Part of the yadCKLM-htrE-yadVN fimbrial operon. Could contribute to adhesion to various surfaces in specific environmental niches	yadN	FALSE	TRUE	COG3539@2|Bacteria,1S3WW@1236|Gammaproteobacteria,1RGR4@1224|Proteobacteria,COG3539@1|root,3XR3J@561|Escherichia			N,U
GUT_GENOME000616_01842	738.371	Part of the yadCKLM-htrE-yadVN fimbrial operon. Could contribute to adhesion to various surfaces in specific environmental niches	yadV	FALSE	TRUE	1MY06@1224|Proteobacteria,COG3121@2|Bacteria,COG3121@1|root,3XRFS@561|Escherichia,1RR9H@1236|Gammaproteobacteria			M,W
GUT_GENOME000616_01843	2443.73	outer membrane usher protein	htrE	FALSE	TRUE	COG3188@2|Bacteria,3XQED@561|Escherichia,COG3188@1|root,1RMPU@1236|Gammaproteobacteria,1MUHE@1224|Proteobacteria	2246		M,N,W	0	0.6
GUT_GENOME000616_01845	597.45	Part of the yadCKLM-htrE-yadVN fimbrial operon. Could contribute to adhesion to various surfaces in specific environmental niches	yadK	FALSE	TRUE	COG3539@1|root,3XR5S@561|Escherichia,COG3539@2|Bacteria,1SQYM@1236|Gammaproteobacteria,1NZBZ@1224|Proteobacteria			N,U
GUT_GENOME000616_01993	878.261	LysR substrate binding domain		FALSE	TRUE	1MXRP@1224|Proteobacteria,1RQP1@1236|Gammaproteobacteria,COG0583@1|root,COG0583@2|Bacteria,3WXEE@544|Citrobacter	1480		K	0.5	0.75
GUT_GENOME000616_01995	787.545	Belongs to the short-chain dehydrogenases reductases (SDR) family		FALSE	TRUE	1RQBN@1236|Gammaproteobacteria,1MUWC@1224|Proteobacteria,COG1028@2|Bacteria,COG1028@1|root	1485		I,Q	0.2	0.866667
GUT_GENOME000616_02096	260.587	Putative zinc ribbon domain		FALSE	TRUE	32VPU@2|Bacteria,1SB6Z@1236|Gammaproteobacteria,2DN5R@1|root,1N0SE@1224|Proteobacteria	417			0	1
GUT_GENOME000616_02554	308.647			TRUE	FALSE	31KJ3@2|Bacteria,1TG8P@1236|Gammaproteobacteria,1QIEB@1224|Proteobacteria,3XQ30@561|Escherichia,2AUVR@1|root	1480			0.5	0.75
GUT_GENOME000616_02640	476.194	nucleic acid-templated transcription	racR	FALSE	TRUE	1MYRR@1224|Proteobacteria,2DM5G@1|root,1S7DV@1236|Gammaproteobacteria,31T0C@2|Bacteria			K
GUT_GENOME000616_02805	1629.01	dodecyl sulfate metabolic process	yjcS	TRUE	FALSE	COG2015@1|root,COG2015@2|Bacteria,3XQEC@561|Escherichia,1RMHR@1236|Gammaproteobacteria,1MU82@1224|Proteobacteria	2267		Q	0.25	0
GUT_GENOME000616_02971	1105.32	Major Facilitator Superfamily	opdE	FALSE	TRUE	1RMBW@1236|Gammaproteobacteria,1MVD0@1224|Proteobacteria,COG0477@1|root,COG2814@2|Bacteria,3XQJ0@561|Escherichia	1500		E,G,P,R	0	0.833333
GUT_GENOME000616_02972	1081.54	cell division		FALSE	TRUE	1MUCD@1224|Proteobacteria,1RP4I@1236|Gammaproteobacteria,COG1073@2|Bacteria,COG1073@1|root,3XPND@561|Escherichia	1500		T	0	0.833333
GUT_GENOME000616_03230	874.862	Transcriptional regulator	Z012_07430	FALSE	TRUE	COG0583@2|Bacteria,COG0583@1|root,3WZZQ@547|Enterobacter,1RQ66@1236|Gammaproteobacteria,1MU2E@1224|Proteobacteria	1485		K	0.2	0.866667
GUT_GENOME000616_03232	666.445	DJ-1/PfpI family		FALSE	TRUE	COG0693@2|Bacteria,1MVTT@1224|Proteobacteria,COG0693@1|root,3X3ZS@547|Enterobacter,1RPVK@1236|Gammaproteobacteria	1485		V	0.2	0.866667
GUT_GENOME000616_03581	351.902	RelE toxin of RelE / RelB toxin-antitoxin system		TRUE	TRUE	COG4737@1|root,COG4737@2|Bacteria,1RHYP@1224|Proteobacteria,1S440@1236|Gammaproteobacteria,3XR71@561|Escherichia	1453			1	1
GUT_GENOME000616_03677	392.015			FALSE	TRUE		2678			0.315789	0.736842
GUT_GENOME000616_03703	1616.72	Type III secretion	invG	FALSE	TRUE	COG1450@1|root,COG1450@2|Bacteria,1MV6H@1224|Proteobacteria,1RPIX@1236|Gammaproteobacteria	1439		N,U	0	0.5
GUT_GENOME000616_03704	749.698	type iii secretion	invF	FALSE	TRUE	1SB0W@1236|Gammaproteobacteria,COG2207@2|Bacteria,COG2207@1|root,1MZDB@1224|Proteobacteria	1441		K	0	1
GUT_GENOME000616_04679	237	protein homotrimerization	yrdA	TRUE	TRUE	1RD76@1224|Proteobacteria,1RPB6@1236|Gammaproteobacteria,3XNFA@561|Escherichia,COG0663@1|root,COG0663@2|Bacteria			R
GUT_GENOME000619_04686	564.589	Bacteriophage lambda tail assembly protein I	JD73_18920	TRUE	TRUE	COG4723@2|Bacteria,COG4723@1|root,1RD21@1224|Proteobacteria,1SA8A@1236|Gammaproteobacteria,3XQTF@561|Escherichia	284		X	1	1
GUT_GENOME000802_00081	265.81	Interacts with phosphorylated BasR protein to mediate transcriptional induction of BasR-activated genes to induce polymyxin resistance in some natural isolates	pmrD	TRUE	TRUE	337I9@2|Bacteria,2EDNI@1|root,1NBZ4@1224|Proteobacteria,1SDH3@1236|Gammaproteobacteria,3XR5G@561|Escherichia
GUT_GENOME000802_00330	1639.44	Sugar transport-related sRNA regulator N-term	ybaE	TRUE	TRUE	1RPRW@1236|Gammaproteobacteria,1PIAC@1224|Proteobacteria,3XMBF@561|Escherichia,COG4533@2|Bacteria,COG4533@1|root			K
GUT_GENOME000802_01314	451.165	Required for maturation of 30S ribosomal subunits	rimP	TRUE	TRUE	1RDP2@1224|Proteobacteria,1S3Y7@1236|Gammaproteobacteria,COG0779@1|root,COG0779@2|Bacteria,3XPKF@561|Escherichia			J
GUT_GENOME000802_01581	265.733	Involved in mRNA degradation. Hydrolyzes single-stranded polyribonucleotides processively in the 3' to 5' direction	rnb	TRUE	TRUE	COG4776@1|root,COG4776@2|Bacteria,1P563@1224|Proteobacteria,1RP5G@1236|Gammaproteobacteria,3XN7V@561|Escherichia	1150		J,K	1	1
GUT_GENOME000802_02142	516.305	Binds the lower part of the 30S subunit head. Binds mRNA in the 70S ribosome, positioning it for translation	rpsC	TRUE	TRUE	COG0092@2|Bacteria,COG0092@1|root,1MUAI@1224|Proteobacteria,1RN0P@1236|Gammaproteobacteria,282K1@191675|unclassified Enterobacteriaceae			J
GUT_GENOME000802_02704	702.39	Functions in the N-end rule pathway of protein degradation where it conjugates Leu, Phe and, less efficiently, Met from aminoacyl-tRNAs to the N-termini of proteins containing an N-terminal arginine or lysine	aat	TRUE	TRUE	COG2360@2|Bacteria,COG2360@1|root,1S1ZB@1236|Gammaproteobacteria,1R9W8@1224|Proteobacteria,3XP4R@561|Escherichia			O
GUT_GENOME000802_03073	395.136	Antitoxin component of a type II toxin-antitoxin (TA) system. Labile antitoxin that binds to the MqsR mRNA interferase toxin and neutralizes its endoribonuclease activity. Overexpression prevents MqsR-mediated cessation of cell growth and inhibition of cell proliferation. Initially reported to act as a cotranscription factor with MqsA. Following further experiments, the MqsR-MqsA complex does not…	mqsA	FALSE	TRUE	1N1C3@1224|Proteobacteria,1SA99@1236|Gammaproteobacteria,COG2944@2|Bacteria,COG2944@1|root,3XQ5B@561|Escherichia	2106		K	0	1
GUT_GENOME000802_03737	856.272	Phosphorylates 6-deoxy-6-sulfo-D-fructose (SF) to 6- deoxy-6-sulfo-D-fructose 1-phosphate (SFP)	yihV	TRUE	FALSE	1MWX4@1224|Proteobacteria,COG0524@1|root,COG0524@2|Bacteria,1RQW6@1236|Gammaproteobacteria,3XPC4@561|Escherichia	2342		F,G	1	0
GUT_GENOME000802_04058	549.208	Non-specific peroxidase that can use thioredoxin or glutathione as a reducing agent. In vitro, utilizes preferentially thioredoxin A to decompose hydrogen peroxide as well as cumene-, tert-butyl-, and linoleic acid hydroperoxides, suggesting that it may have one or more organic hydroperoxide as its physiological substrate	btuE	TRUE	TRUE	COG0386@2|Bacteria,COG0386@1|root,1RD1R@1224|Proteobacteria,1S425@1236|Gammaproteobacteria,3XMQZ@561|Escherichia			I,O,V
GUT_GENOME000802_04271	278.324		ybjH	TRUE	TRUE	3XPTV@561|Escherichia,1SBQ1@1236|Gammaproteobacteria,32VJW@2|Bacteria,1N6A5@1224|Proteobacteria,2DZVA@1|root
GUT_GENOME000802_04398	408	This protein is a repressor of division inhibition gene dicB	dicA	TRUE	FALSE	1SBKZ@1236|Gammaproteobacteria,COG1396@2|Bacteria,1N2U8@1224|Proteobacteria,3XR8U@561|Escherichia,COG1396@1|root			K
GUT_GENOME000802_04454	1161.63	Belongs to the UDP-glucose GDP-mannose dehydrogenase family		FALSE	TRUE	1RMVW@1236|Gammaproteobacteria,1MW5U@1224|Proteobacteria,1Y3UU@135624|Aeromonadales,COG1004@1|root,COG1004@2|Bacteria			M
GUT_GENOME000822_01547	359.635	Protein of unknown function (DUF2500)	yhhM	TRUE	TRUE	1RDRA@1224|Proteobacteria,1S5XK@1236|Gammaproteobacteria,2AHZY@1|root,318D9@2|Bacteria,3XPRJ@561|Escherichia
GUT_GENOME000822_03028	609.051			FALSE	TRUE	1TGCC@1236|Gammaproteobacteria,1QIHP@1224|Proteobacteria,31KN2@2|Bacteria,2AUYH@1|root,3W1VQ@53335|Pantoea	1760			0	0.0952381
GUT_GENOME000822_03904	1352.36	Member of the two-component regulatory system ZraS ZraR. May function as a membrane-associated protein kinase that phosphorylates ZraR in response to high concentrations of zinc or lead in the medium	zraS	TRUE	TRUE	3XPH1@561|Escherichia,COG4191@2|Bacteria,1RSI4@1236|Gammaproteobacteria,1RCM9@1224|Proteobacteria,COG4191@1|root			T
GUT_GENOME000822_04426	257.539			FALSE	TRUE		1571			0	1
GUT_GENOME000913_02890	210			TRUE	TRUE		2678			0.315789	0.736842
GUT_GENOME000913_03325	970.34	lipopolysaccharide	rfaC	TRUE	TRUE	3XMT5@561|Escherichia,1MYZA@1224|Proteobacteria,1RPMN@1236|Gammaproteobacteria,COG0859@2|Bacteria,COG0859@1|root			M
GUT_GENOME000913_03326	1197.3	O-Antigen ligase	rfaL	FALSE	TRUE	COG3307@2|Bacteria,COG3307@1|root,1RY8K@1236|Gammaproteobacteria,1QAGT@1224|Proteobacteria,3XMPJ@561|Escherichia	2380		M	0	1
GUT_GENOME000913_03328	1001.33	Lipopolysaccharide 1,2-glucosyltransferase	rfaJ	FALSE	TRUE	COG1442@1|root,1MUEC@1224|Proteobacteria,3XQE2@561|Escherichia,1RMCM@1236|Gammaproteobacteria,COG1442@2|Bacteria	2380		M	0	1
GUT_GENOME000913_04140	305.424	TrbM	kikA	FALSE	TRUE	1S8VP@1236|Gammaproteobacteria,2E2MR@1|root,32XQV@2|Bacteria,1N527@1224|Proteobacteria,1MT0M@122277|Pectobacterium
GUT_GENOME000913_04141	395.383	Cag pathogenicity island protein Cag12		FALSE	TRUE	1MTSP@122277|Pectobacterium,1QFN8@1224|Proteobacteria,1TCXU@1236|Gammaproteobacteria,29WGA@1|root,30I2A@2|Bacteria
GUT_GENOME000913_04419	1937.26	cell adhesion	yeeJ	TRUE	FALSE	COG1388@1|root,COG1388@2|Bacteria,1MX9S@1224|Proteobacteria,1RPK7@1236|Gammaproteobacteria,3XN7T@561|Escherichia,COG1470@1|root,COG1470@2|Bacteria	1890		M	1	0
GUT_GENOME000913_04591	1447.27	Tn3 transposase DDE domain		FALSE	TRUE	1MUIU@1224|Proteobacteria,1RPZZ@1236|Gammaproteobacteria,COG4644@2|Bacteria,COG4644@1|root,3X24J@547|Enterobacter	1811		L,X	0	0.333333
GUT_GENOME000913_04651	327	Bacterial mobilisation protein (MobC)		TRUE	FALSE	2JF6Z@204037|Dickeya,31DV0@2|Bacteria,2ANUK@1|root,1QB5E@1224|Proteobacteria,1T6P7@1236|Gammaproteobacteria
GUT_GENOME000913_04653	333	RelE toxin of RelE / RelB toxin-antitoxin system		TRUE	FALSE	COG4737@1|root,COG4737@2|Bacteria,1S7H6@1236|Gammaproteobacteria,1N7N5@1224|Proteobacteria
GUT_GENOME000913_04700	839.577	Transposase		FALSE	TRUE	1MUER@1224|Proteobacteria,1RMAQ@1236|Gammaproteobacteria,COG3547@1|root,COG3547@2|Bacteria,3WZ69@544|Citrobacter	1804		L,X	0	0.5
GUT_GENOME000919_02063	560.368	Bacterial regulatory proteins, tetR family	eefR	TRUE	FALSE	3XMVS@561|Escherichia,COG1309@1|root,1SYQC@1236|Gammaproteobacteria,1R85H@1224|Proteobacteria,COG1309@2|Bacteria	1022		K	1	0.761905
GUT_GENOME000919_03776	242.288	Antitoxin component of a type II toxin-antitoxin (TA) system. Counteracts the effect of cognate toxin RelE via direct protein-protein interaction, preventing RelE from entering the ribosome A site and thus inhibiting its endoribonuclease activity. An autorepressor of relBE operon transcription. 2 RelB dimers bind to 2 operator sequences	relB	TRUE	FALSE	COG3077@2|Bacteria,1SCQI@1236|Gammaproteobacteria,COG3077@1|root,1N8G2@1224|Proteobacteria,3XREU@561|Escherichia	2403		K,V	0.666667	0
GUT_GENOME000919_04568	390.914			TRUE	TRUE	2EW4N@1|root,1NTAJ@1224|Proteobacteria,1SJN9@1236|Gammaproteobacteria,33PHU@2|Bacteria	627			1	1
GUT_GENOME000930_00160	567.93	translation elongation factor activity	yeiP	TRUE	TRUE	1NWY9@1224|Proteobacteria,COG0231@2|Bacteria,1RQ0N@1236|Gammaproteobacteria,COG0231@1|root,3XNJG@561|Escherichia			J
GUT_GENOME000930_01319	983.487		sinI	TRUE	FALSE	28IX9@1|root,33DGT@2|Bacteria,1NJXS@1224|Proteobacteria,1SJI8@1236|Gammaproteobacteria	1313			0.25	0.0833333
GUT_GENOME000930_01872	457.411	NfeD-like C-terminal, partner-binding	ybbJ	TRUE	TRUE	COG1585@2|Bacteria,3XPSV@561|Escherichia,1S5W4@1236|Gammaproteobacteria,1N241@1224|Proteobacteria,COG1585@1|root			O,U
GUT_GENOME000930_02161	532.975	Regulates the expression of 12-16 transcription units involved in various steps of sulfur utilization. Represses expression of pfkB, fliZ, cysE, ydcO and its own expression. Activates expression of ypfN. Acts by binding to SutR boxes	ydcN	TRUE	TRUE	COG1396@1|root,COG1396@2|Bacteria,3XPJ9@561|Escherichia,1RQG0@1236|Gammaproteobacteria,1R4NU@1224|Proteobacteria			K
GUT_GENOME000930_02327	972.478	peptidase activity	yhbU	TRUE	TRUE	1MUQG@1224|Proteobacteria,COG0826@2|Bacteria,COG0826@1|root,1RP6X@1236|Gammaproteobacteria,3XN96@561|Escherichia			J,O
GUT_GENOME000930_02596	243	GCN5-related N-acetyl-transferase	yjdJ	TRUE	TRUE	COG2388@2|Bacteria,1N6YS@1224|Proteobacteria,1S6I3@1236|Gammaproteobacteria,3XPWS@561|Escherichia,COG2388@1|root			R
GUT_GENOME000930_02705	657.354	UPF0073 inner membrane protein YqfA	yqfA	TRUE	TRUE	COG1272@2|Bacteria,1RR4R@1236|Gammaproteobacteria,COG1272@1|root,1PGRH@1224|Proteobacteria,3XMNM@561|Escherichia			U
GUT_GENOME000930_03194	1129.5			TRUE	TRUE		1454			0.333333	0.666667
GUT_GENOME000930_03270	1218.88	Exports the siderophore enterobactin out of the cell	entS	TRUE	TRUE	COG0477@2|Bacteria,1MXZ3@1224|Proteobacteria,COG0477@1|root,1RMY2@1236|Gammaproteobacteria,3XN2P@561|Escherichia			E,G,P,R
GUT_GENOME000930_03637	1067.41	CblD family pilus biogenesis initiator protein	tcfD	TRUE	FALSE	1RE92@1224|Proteobacteria,30W3V@2|Bacteria,2A77P@1|root,1S5DK@1236|Gammaproteobacteria	1351			0.181818	0
GUT_GENOME000930_04030	303.981	Required for growth and or survival at acidic conditions	asr	TRUE	TRUE	2DHUV@1|root,32U9T@2|Bacteria,1MZXN@1224|Proteobacteria,1S9PA@1236|Gammaproteobacteria,3XQ0P@561|Escherichia
GUT_GENOME000930_04533	620.916	Peptidase S24-like		FALSE	TRUE	COG1974@2|Bacteria,COG1974@1|root,1S1BF@1236|Gammaproteobacteria,1MVHQ@1224|Proteobacteria			K,T
GUT_GENOME000930_04561	917	Probably responsible for the transport of L-galactonate from the periplasm across the inner membrane. Is essential for growth on L-galactonate as the sole carbon source	yjjL	TRUE	FALSE	1RPRB@1236|Gammaproteobacteria,1MVPS@1224|Proteobacteria,3XP6M@561|Escherichia,COG2271@2|Bacteria,COG2271@1|root	1359		G,P	0.409396	0.0268456
GUT_GENOME000930_04581	981.693	aspartate--ammonia ligase	asnA	TRUE	TRUE	COG2502@1|root,1RN79@1236|Gammaproteobacteria,1MVWF@1224|Proteobacteria,COG2502@2|Bacteria,3XNFG@561|Escherichia			E,F
GUT_GENOME000930_04582	458.79	and repressor of the expression of gidA at a post-transcriptional level	asnC	TRUE	TRUE	COG1522@1|root,COG1522@2|Bacteria,1RRPA@1236|Gammaproteobacteria,1MWPX@1224|Proteobacteria,3XM6Y@561|Escherichia			K
GUT_GENOME000930_04663	1036.63	PFAM Glycosyl transferase, group 1		TRUE	FALSE	COG0438@2|Bacteria,COG0438@1|root,1RSFE@1236|Gammaproteobacteria,1MUYN@1224|Proteobacteria,2Q9UM@267890|Shewanellaceae	1841		M	1	0
GUT_GENOME000930_05249	313.005	sequence-specific DNA binding	ydaS	FALSE	TRUE	COG4197@1|root,COG4197@2|Bacteria,1NF6D@1224|Proteobacteria,1SDR1@1236|Gammaproteobacteria			K
GUT_GENOME000930_05383	302.606			TRUE	FALSE	1TJCN@1236|Gammaproteobacteria,1Y10T@135623|Vibrionales,2AXFI@1|root,31PF2@2|Bacteria,1QM4S@1224|Proteobacteria	185			1	0
GUT_GENOME000930_05431	600.726	N-acetylmuramoyl-L-alanine amidase activity		FALSE	TRUE	4QUP9@35237|dsDNA viruses no RNA stage,4QAK6@10239|Viruses,4QPBY@28883|Caudovirales
GUT_GENOME000930_05432	1217.96	N-acetylmuramoyl-L-alanine amidase activity		FALSE	TRUE	4QUP9@35237|dsDNA viruses no RNA stage,4QAK6@10239|Viruses,4QPBY@28883|Caudovirales
GUT_GENOME000930_05433	324	Phage gp6-like head-tail connector protein		FALSE	TRUE	4QPS7@28883|Caudovirales,4QBCW@10239|Viruses,4QJ2C@10662|Myoviridae,4QUN6@35237|dsDNA viruses no RNA stage
GUT_GENOME000930_05444	607.968	transcriptional regulator	ydfF	FALSE	TRUE	1MWCW@1224|Proteobacteria,1RRN0@1236|Gammaproteobacteria,COG0640@1|root,COG0640@2|Bacteria			K
GUT_GENOME000930_05448	518.222			TRUE	TRUE		1408			1	1
GUT_GENOME000930_05512	217.364			TRUE	TRUE		486			1	0.833333
GUT_GENOME000930_05567	339.81			TRUE	FALSE		674			1	0
GUT_GENOME001142_00547	216	Bacteriophage holin family HP1		TRUE	FALSE	2DZJ9@1|root,32VC7@2|Bacteria,1N27K@1224|Proteobacteria,1SE5W@1236|Gammaproteobacteria	1856			1	0
GUT_GENOME001142_01199	1001.75	Transposase		TRUE	FALSE	1MUER@1224|Proteobacteria,1RMAQ@1236|Gammaproteobacteria,COG3547@1|root,COG3547@2|Bacteria,4036M@613|Serratia	1333		L,X	0.5	0.5
GUT_GENOME001142_03910	334.962			FALSE	TRUE
GUT_GENOME001142_03914	1331.54	Bacterial shufflon protein, N-terminal constant region	pilV	FALSE	TRUE	1P5SN@1224|Proteobacteria,1RSQK@1236|Gammaproteobacteria,COG2165@1|root,COG2165@2|Bacteria			N,U,W
GUT_GENOME001142_03916	470.244	Lytic transglycosylase	pilT	FALSE	TRUE	COG0741@2|Bacteria,1MZU4@1224|Proteobacteria,COG0741@1|root			M
GUT_GENOME001142_03923	1231.86	Pilin accessory protein (PilO)		FALSE	TRUE	315FS@2|Bacteria,2AFFN@1|root,283FW@191675|unclassified Enterobacteriaceae,1PVIS@1224|Proteobacteria,1TBST@1236|Gammaproteobacteria
GUT_GENOME001142_03924	1518.9	Bacterial type II and III secretion system protein		FALSE	TRUE	1T2C9@1236|Gammaproteobacteria,1QVDE@1224|Proteobacteria,COG4796@1|root,COG4796@2|Bacteria			U
GUT_GENOME001142_03925	438	PilM		FALSE	TRUE	303PE@2|Bacteria,29GRJ@1|root,283NR@191675|unclassified Enterobacteriaceae,1RTH0@1236|Gammaproteobacteria,1QQTE@1224|Proteobacteria
GUT_GENOME001142_03928	880.18			FALSE	TRUE
GUT_GENOME001142_03930	242.963			FALSE	TRUE
GUT_GENOME001142_03931	1648.85	Flotillin	yqiK	FALSE	TRUE	COG2268@1|root,3ZMSU@590|Salmonella,1RRHJ@1236|Gammaproteobacteria,1P50K@1224|Proteobacteria,COG2268@2|Bacteria
GUT_GENOME001142_03932	593.346	Protein of unknown function (DUF1449)	yqiJ	FALSE	TRUE	COG1585@2|Bacteria,COG1585@1|root,1R4NP@1224|Proteobacteria,1RQ4X@1236|Gammaproteobacteria,3WZ19@544|Citrobacter			O,U
GUT_GENOME001142_03934	630.723	Enhances distal genes transcription elongation in a specialized subset of operons that encode extracytoplasmic components. RfaH is recruited into a multi-component RNA polymerase complex by the ops element, which is a short conserved DNA sequence located downstream of the main promoter of these operons. Once bound, RfaH suppresses pausing and inhibits Rho- dependent and intrinsic termination at a…	rfaH	FALSE	TRUE	1N01W@1224|Proteobacteria,1S91B@1236|Gammaproteobacteria,COG0250@2|Bacteria,COG0250@1|root			K
GUT_GENOME001142_03940	304.049			FALSE	TRUE
GUT_GENOME001142_03943	867	EamA-like transporter family		FALSE	TRUE	1N1QZ@1224|Proteobacteria,COG0697@1|root,COG0697@2|Bacteria			E,G,R
GUT_GENOME001142_03944	1024.31			FALSE	TRUE	1NV7B@1224|Proteobacteria,1SNC2@1236|Gammaproteobacteria,2F1FS@1|root,33UGG@2|Bacteria
GUT_GENOME001142_03960	372.632	acetyltransferase		FALSE	TRUE	COG0454@1|root,COG0456@2|Bacteria,1SJB0@1236|Gammaproteobacteria,1NII2@1224|Proteobacteria			J,K,R
GUT_GENOME001142_04137	832.21	efflux pump	mexB	TRUE	FALSE	1MU48@1224|Proteobacteria,1RMBN@1236|Gammaproteobacteria,3XP4C@561|Escherichia,COG0841@1|root,COG0841@2|Bacteria	1322		V	1	0
GUT_GENOME001142_04141	1132.76	Catalyzes the formation of S-adenosylmethionine (AdoMet) from methionine and ATP. The overall synthetic reaction is composed of two sequential steps, AdoMet formation and the subsequent tripolyphosphate hydrolysis which occurs prior to release of AdoMet from the enzyme		TRUE	FALSE	3XQTK@561|Escherichia,1MUFQ@1224|Proteobacteria,1S1VA@1236|Gammaproteobacteria,COG0192@2|Bacteria,COG0192@1|root	1322		H	1	0
GUT_GENOME001142_04142	1044.87	transcriptional regulator		TRUE	FALSE	COG4753@2|Bacteria,COG2207@1|root,3XN7P@561|Escherichia,1RN9G@1236|Gammaproteobacteria,1N7DZ@1224|Proteobacteria,COG4753@1|root,COG2207@2|Bacteria	1322		K,T	1	0
GUT_GENOME001142_04148	905.249	4Fe-4S binding domain		TRUE	FALSE	1RQUF@1236|Gammaproteobacteria,COG1180@1|root,3XQ7F@561|Escherichia,1QJHU@1224|Proteobacteria,COG1180@2|Bacteria	1322		C,O	1	0
GUT_GENOME001142_04149	2381.32	formate C-acetyltransferase activity		TRUE	FALSE	1MWBF@1224|Proteobacteria,3XNTU@561|Escherichia,COG1882@1|root,COG1882@2|Bacteria,1RMEK@1236|Gammaproteobacteria	1322		C	1	0
GUT_GENOME001142_04150	573.634	DJ-1/PfpI family	yhbO	TRUE	FALSE	1RPRR@1236|Gammaproteobacteria,3XQSS@561|Escherichia,COG0693@2|Bacteria,COG0693@1|root,1MY0C@1224|Proteobacteria	1322		V	1	0
GUT_GENOME001142_04152	1490.4	Aldehyde dehydrogenase family	pduP	TRUE	FALSE	COG1012@1|root,1RP7H@1236|Gammaproteobacteria,COG1012@2|Bacteria,1QUBI@1224|Proteobacteria,3XMCR@561|Escherichia	1322		C,I	1	0
GUT_GENOME001142_04153	768.522	BMC	pduB	TRUE	FALSE	COG4816@2|Bacteria,1MY5F@1224|Proteobacteria,3XMV9@561|Escherichia,COG4816@1|root,1RP11@1236|Gammaproteobacteria	1322		E	1	0
GUT_GENOME001142_04154	281.845	Carbon dioxide concentrating mechanism carboxysome shell protein	pduA	TRUE	FALSE	COG4577@2|Bacteria,COG4577@1|root,1S5Y6@1236|Gammaproteobacteria,1RH1U@1224|Proteobacteria	1322		C,Q	1	0
GUT_GENOME001142_04155	1161.3	Catalyzes the formation of acetyl phosphate from acetate and ATP. Can also catalyze the reverse reaction	ackA	TRUE	FALSE	1MW61@1224|Proteobacteria,1RMKB@1236|Gammaproteobacteria,3XQGM@561|Escherichia,COG0282@1|root,COG0282@2|Bacteria	1322		C,F	1	0
GUT_GENOME001142_04156	494.708	Haem-degrading		TRUE	FALSE	3XPYR@561|Escherichia,COG3193@2|Bacteria,COG3193@1|root,1RG5S@1224|Proteobacteria,1S429@1236|Gammaproteobacteria	1322		T	1	0
GUT_GENOME001142_04157	269.918	Ethanolamine utilisation protein EutN/carboxysome	eutN	TRUE	FALSE	1SACY@1236|Gammaproteobacteria,COG4576@2|Bacteria,COG4576@1|root,3XQ2W@561|Escherichia,1RKCA@1224|Proteobacteria	1322		C,Q	1	0
GUT_GENOME001142_04158	702.211	Flavoprotein		TRUE	FALSE	3XQ6R@561|Escherichia,1N564@1224|Proteobacteria,2D8J5@1|root,32TRE@2|Bacteria,1SBQJ@1236|Gammaproteobacteria	1322			1	0
GUT_GENOME001142_04159	742.813	Ethanolamine utilization		TRUE	FALSE	3XNST@561|Escherichia,1S06N@1236|Gammaproteobacteria,COG4820@2|Bacteria,COG4820@1|root,1MVXX@1224|Proteobacteria	1322		E	1	0
GUT_GENOME001142_04160	676.823	Involved in 1,2-propanediol (1,2-PD) degradation by catalyzing the conversion of propanoyl-CoA to propanoyl-phosphate		TRUE	FALSE	3XPXM@561|Escherichia,1RYQF@1236|Gammaproteobacteria,1R5F0@1224|Proteobacteria,COG4869@2|Bacteria,COG4869@1|root	1322		Q	1	0
GUT_GENOME001142_04161	1088.16	Iron-containing alcohol dehydrogenase		TRUE	FALSE	COG1454@2|Bacteria,1RRMP@1236|Gammaproteobacteria,3XQCD@561|Escherichia,COG1454@1|root,1MVPH@1224|Proteobacteria	1322		C	1	0
GUT_GENOME001142_04516	565.737			FALSE	TRUE	340AG@2|Bacteria,1NXR0@1224|Proteobacteria,2F7WH@1|root,1SPZ1@1236|Gammaproteobacteria
GUT_GENOME001142_04517	1172.33			FALSE	TRUE	1RZS4@1236|Gammaproteobacteria,2Z874@2|Bacteria,28I39@1|root,1R56Z@1224|Proteobacteria
GUT_GENOME001142_04519	2826.77	type IV secretory pathway VirB4	icmB	FALSE	TRUE	COG0433@1|root,COG0433@2|Bacteria,COG3451@1|root,COG3451@2|Bacteria,1MWW7@1224|Proteobacteria,1RQMQ@1236|Gammaproteobacteria			L,U
GUT_GENOME001142_04523	241.201	Putative excisionase (DUF1233)		TRUE	TRUE	31TFQ@2|Bacteria,1RU0Q@1236|Gammaproteobacteria,3XRBM@561|Escherichia,2CQE5@1|root,1QR63@1224|Proteobacteria	2650			1	1
GUT_GENOME001142_04528	252	Uncharacterised BCR, YnfA/UPF0060 family	ynfA	TRUE	TRUE	COG1742@1|root,COG1742@2|Bacteria,1MZI8@1224|Proteobacteria,1SA4U@1236|Gammaproteobacteria,3XPXU@561|Escherichia			R
GUT_GENOME001142_04686	1084.42	L-lactate permease	lldP	TRUE	FALSE	1RPNW@1236|Gammaproteobacteria,1MV13@1224|Proteobacteria,COG1620@2|Bacteria,COG1620@1|root,1MRIW@122277|Pectobacterium	528		C	0.0769231	0
GUT_GENOME001142_04889	532.719	Protein of unknown function (DUF1133)		TRUE	FALSE	1S10W@1236|Gammaproteobacteria,3XR0E@561|Escherichia,28MFS@1|root,1Q0BK@1224|Proteobacteria,2ZAT6@2|Bacteria
GUT_GENOME001361_02951	366.059	Domain of unknown function (DUF932)		TRUE	TRUE	2C4I5@1|root,2ZBQ0@2|Bacteria,1S2T2@1236|Gammaproteobacteria,1RAMC@1224|Proteobacteria	745			1	1
GUT_GENOME001456_01785	297.026	Protein of unknown function (DUF2502)	yaaX	TRUE	TRUE	2B58A@1|root,3XRGB@561|Escherichia,32XJS@2|Bacteria,1S9KR@1236|Gammaproteobacteria,1N4SV@1224|Proteobacteria
GUT_GENOME001456_03446	998.723	HflC and HflK help govern the stability of phage lambda cII protein, and thereby control the lysogenization frequency of phage lambda. HflKC inhibits the SecY-degrading activity of FtsH, possibly helping quality control of integral membrane proteins	hflC	TRUE	TRUE	COG0330@2|Bacteria,COG0330@1|root,1MV7R@1224|Proteobacteria,1RM8Z@1236|Gammaproteobacteria,3XM38@561|Escherichia			O
GUT_GENOME001456_03963	613.066	Tail fiber assembly protein	tfaE	TRUE	TRUE	COG2110@1|root,1RDMN@1224|Proteobacteria,1S6U8@1236|Gammaproteobacteria,COG2110@2|Bacteria	489		J	0.964286	0.892857
GUT_GENOME001456_04154	2023.88			FALSE	TRUE	1RP7Y@1236|Gammaproteobacteria,28NBP@1|root,2ZBEY@2|Bacteria,1QUD6@1224|Proteobacteria
GUT_GENOME001456_04161	398.738			FALSE	TRUE	33DTQ@2|Bacteria,1NI9B@1224|Proteobacteria,2EK3A@1|root,1SIZC@1236|Gammaproteobacteria
GUT_GENOME001456_04162	528.499			FALSE	TRUE	1RM2Z@1224|Proteobacteria,328UU@2|Bacteria,2BF2T@1|root,1S7DC@1236|Gammaproteobacteria
GUT_GENOME001456_04163	706.773			FALSE	TRUE	1NWB6@1224|Proteobacteria,2F5BA@1|root,33XXE@2|Bacteria,1SNWM@1236|Gammaproteobacteria
GUT_GENOME001456_04167	350.908			FALSE	TRUE	1N7Y8@1224|Proteobacteria,335UR@2|Bacteria,2C9DP@1|root,1SF24@1236|Gammaproteobacteria
GUT_GENOME001456_04169	290.878			FALSE	TRUE	2E6TC@1|root,331DA@2|Bacteria,1SDG6@1236|Gammaproteobacteria,1NDJU@1224|Proteobacteria
GUT_GENOME001456_04170	1133.12	twitching motility protein	pilT	FALSE	TRUE	COG2805@1|root,1TQ5F@1239|Firmicutes,249H9@186801|Clostridia,36E42@31979|Clostridiaceae,COG2805@2|Bacteria			N,U,W
GUT_GENOME001456_04171	824.554	Type IV secretory system, conjugal DNA-protein transfer	dotC	FALSE	TRUE	COG1388@1|root,COG1388@2|Bacteria,1RZGD@1236|Gammaproteobacteria,1MYQ8@1224|Proteobacteria			M
GUT_GENOME001456_04172	457.816	sequence-specific DNA binding		FALSE	TRUE	COG1396@1|root,3Y1RY@572511|Blautia,24SEF@186801|Clostridia,COG1396@2|Bacteria,1UVI3@1239|Firmicutes			K
GUT_GENOME001456_04185	1045.12	Toxin co-regulated pilus biosynthesis protein Q	pilL	FALSE	TRUE	COG3266@2|Bacteria,COG3266@1|root,1QQT4@1224|Proteobacteria,1RTGT@1236|Gammaproteobacteria,283IX@191675|unclassified Enterobacteriaceae			D
GUT_GENOME001456_04298	596.247	baseplate assembly protein		TRUE	TRUE	COG4540@2|Bacteria,COG4540@1|root,1RYQ7@1236|Gammaproteobacteria,1R639@1224|Proteobacteria	489		X	0.964286	0.892857
GUT_GENOME001456_04299	348	baseplate protein		TRUE	TRUE	COG3628@2|Bacteria,COG3628@1|root,1S5AU@1236|Gammaproteobacteria,1NDEW@1224|Proteobacteria	493		X	0.916667	0.916667
GUT_GENOME001456_04544	568.482	FMN binding	yddH	TRUE	TRUE	3XNUH@561|Escherichia,COG1853@2|Bacteria,COG1853@1|root,1RQU5@1236|Gammaproteobacteria,1NB1B@1224|Proteobacteria			C
GUT_GENOME001456_04625	579.509	Reverse transcriptase (RNA-dependent DNA polymerase)		TRUE	FALSE	COG3344@2|Bacteria,COG3344@1|root,1RQP7@1236|Gammaproteobacteria,1MVI1@1224|Proteobacteria	1394		L,X	1	0
GUT_GENOME001475_00905	2475.85	PRD domain		TRUE	FALSE	COG1221@2|Bacteria,COG1221@1|root,COG3933@2|Bacteria,COG3933@1|root,1R3VP@1224|Proteobacteria,1RQKE@1236|Gammaproteobacteria,3WXZT@544|Citrobacter	2356		K,T	1	0
GUT_GENOME001475_00906	428.209	PTS system fructose IIA component		TRUE	FALSE	1RC64@1224|Proteobacteria,COG2893@2|Bacteria,1S3K7@1236|Gammaproteobacteria,3WYCN@544|Citrobacter,COG2893@1|root	2356		G	1	0
GUT_GENOME001475_00907	484.416	PTS system sorbose subfamily IIB component		TRUE	FALSE	1P9P7@1224|Proteobacteria,1RYVC@1236|Gammaproteobacteria,COG3444@2|Bacteria,COG3444@1|root,3WXA7@544|Citrobacter	2358		G	1	0
GUT_GENOME001475_00908	745.532	PTS system sorbose-specific iic component		TRUE	FALSE	COG3715@2|Bacteria,1PGQK@1224|Proteobacteria,1RS3P@1236|Gammaproteobacteria,COG3715@1|root,3WY1X@544|Citrobacter	2356		G	1	0
GUT_GENOME001475_00909	838.276	PTS system mannose/fructose/sorbose family IID component		TRUE	FALSE	COG3716@2|Bacteria,COG3716@1|root,3ZJVG@590|Salmonella,1RQVW@1236|Gammaproteobacteria,1R50V@1224|Proteobacteria	2356		G	1	0
GUT_GENOME001475_00911	738.381	Pfam:DUF1341		TRUE	FALSE	1RYTS@1236|Gammaproteobacteria,3WXZY@544|Citrobacter,2Z844@2|Bacteria,2DBAP@1|root,1R59N@1224|Proteobacteria	2356			1	0
GUT_GENOME001475_01643	439.023	helix-turn-helix domain protein	dicA	TRUE	TRUE	1N2U8@1224|Proteobacteria,COG1396@2|Bacteria,1SBKZ@1236|Gammaproteobacteria,COG1396@1|root	2202		K	1	1
GUT_GENOME001475_01805	534.434		ydjO	TRUE	TRUE	1NR3K@1224|Proteobacteria,1SMQV@1236|Gammaproteobacteria,33PDX@2|Bacteria,2EW0H@1|root,3XR75@561|Escherichia	2693			0.901099	0.901099
GUT_GENOME001475_03090	671.404	nucleic acid-templated transcription	cohE	TRUE	FALSE	1R40A@1224|Proteobacteria,COG1974@2|Bacteria,COG1974@1|root,1RZV5@1236|Gammaproteobacteria	1851		K,T	1	0
GUT_GENOME001475_03815	854.262	Transposase	Z012_11195	TRUE	TRUE	COG0675@2|Bacteria,1MUU0@1224|Proteobacteria,1RS1J@1236|Gammaproteobacteria,COG0675@1|root,3XPN5@561|Escherichia	2683		L,X	1	1
GUT_GENOME001477_00349	620.051	Iron/manganese superoxide dismutases, alpha-hairpin domain		TRUE	TRUE	COG0605@1|root,1M0RX@119089|Chromadorea,39ZR3@33154|Opisthokonta,KOG0876@2759|Eukaryota,415FC@6236|Rhabditida,40R2W@6231|Nematoda,3DDQB@33213|Bilateria,3BXTV@33208|Metazoa			P
GUT_GENOME001477_01689	219.012			TRUE	TRUE	1NYNU@1224|Proteobacteria,2CHHE@1|root,1SQJM@1236|Gammaproteobacteria,33ZHN@2|Bacteria	1906			1	1
GUT_GENOME001477_04019	276.686			TRUE	FALSE
GUT_GENOME001477_04452	898.465	Catalyzes the transfer of myristate from myristoyl-acyl carrier protein (ACP) to Kdo(2)-(lauroyl)-lipid IV(A) to form Kdo(2)-lipid A	lpxM	TRUE	FALSE	COG1560@1|root,1RRI7@1236|Gammaproteobacteria,1N9ZJ@1224|Proteobacteria,COG1560@2|Bacteria	1344		I,M	1	0
GUT_GENOME001477_04476	254.206	Protein of unknown function (DUF826)		TRUE	FALSE	4QPPP@28883|Caudovirales,4QNKG@10744|Podoviridae,4QWJV@35237|dsDNA viruses no RNA stage,4QEKZ@10239|Viruses	472			0.235294	0
GUT_GENOME001477_04525	2270.72	Tn3 transposase DDE domain		TRUE	FALSE	1MUIU@1224|Proteobacteria,1RPZZ@1236|Gammaproteobacteria,3W1X1@53335|Pantoea,COG4644@1|root,COG4644@2|Bacteria			L,X
GUT_GENOME001477_04526	582.287	Resolvase, N terminal domain		TRUE	FALSE	COG1961@1|root,COG1961@2|Bacteria,1N59H@1224|Proteobacteria,1SC17@1236|Gammaproteobacteria			L
GUT_GENOME001499_02277	947.213	Catalyzes the breakage of the C-P bond in alpha-D-ribose 1-methylphosphonate 5-phosphate (PRPn) forming alpha-D-ribose	phnJ	TRUE	TRUE	COG3627@1|root,1MV7T@1224|Proteobacteria,COG3627@2|Bacteria,1RNI7@1236|Gammaproteobacteria			H,P
GUT_GENOME001499_02330	532.263	Involved in the storage or transport of lipids necessary for membrane maintenance under stressful conditions. Displays a binding preference for lysophospholipids	blc	TRUE	TRUE	1S3PW@1236|Gammaproteobacteria,COG3040@2|Bacteria,COG3040@1|root,1RDAI@1224|Proteobacteria,3XMI7@561|Escherichia			M
GUT_GENOME001502_00237	1824.72	Overexpression reduces biofilm formation. Cyclic-di-GMP is a second messenger which controls cell surface-associated traits in bacteria	yliE	TRUE	TRUE	1N299@1224|Proteobacteria,1T2T4@1236|Gammaproteobacteria,COG2200@2|Bacteria,COG2200@1|root,3XNPI@561|Escherichia			T
GUT_GENOME001502_03985	424.622	Phage protein GP46		FALSE	TRUE	4QHYH@10662|Myoviridae,4QZID@35237|dsDNA viruses no RNA stage,4QRCT@28883|Caudovirales,4QFCQ@10239|Viruses	2311			0	0.875
GUT_GENOME001593_02894	1403.87	Phage tail sheath protein		FALSE	TRUE	4QAZ6@10239|Viruses,4QPHV@28883|Caudovirales,4QI4H@10662|Myoviridae,4QUU8@35237|dsDNA viruses no RNA stage	2311			0	0.875
GUT_GENOME001593_04072	237.95			TRUE	FALSE	1P8II@1224|Proteobacteria,1SVGR@1236|Gammaproteobacteria,28U1F@1|root,2ZG7Q@2|Bacteria	1572			1	0
GUT_GENOME001593_04112	523.971			TRUE	FALSE	1QIH5@1224|Proteobacteria,2AUY0@1|root,31KMH@2|Bacteria,3W1SB@53335|Pantoea,1TGBS@1236|Gammaproteobacteria	1574			0.964286	0.642857
GUT_GENOME001593_04245	356.354			FALSE	TRUE	33P83@2|Bacteria,2EVUC@1|root,1SIUS@1236|Gammaproteobacteria,1NGAY@1224|Proteobacteria
GUT_GENOME001691_00391	455.542	acts as a transcription factor. The YhaV PrlF complex binds the prlF-yhaV operon, probably negatively regulating its expression	yhaV	TRUE	TRUE	28N0M@1|root,2ZB6Z@2|Bacteria,1Q4H5@1224|Proteobacteria,3XQ7U@561|Escherichia,1S3G4@1236|Gammaproteobacteria	2598		K	1	1
GUT_GENOME001691_02990	473.44	Permuted papain-like amidase enzyme, YaeF/YiiX, C92 family	yiiX	TRUE	TRUE	COG3863@1|root,1S01D@1236|Gammaproteobacteria,COG3863@2|Bacteria,1RBGX@1224|Proteobacteria,3XN9V@561|Escherichia
GUT_GENOME001882_00960	1471.63	Participates in both transcription termination and antitermination	nusA	TRUE	TRUE	1MWT7@1224|Proteobacteria,1RNQS@1236|Gammaproteobacteria,COG0195@1|root,COG0195@2|Bacteria,3XP77@561|Escherichia			K
GUT_GENOME001882_00971	294.287	CRS1_YhbY	yhbY	TRUE	TRUE	COG1534@1|root,COG1534@2|Bacteria,1N8K5@1224|Proteobacteria,1SDIM@1236|Gammaproteobacteria,3ZMAA@590|Salmonella			J
GUT_GENOME001882_01002	955.958	EpsG family		TRUE	FALSE	32NEX@2|Bacteria,2BT9H@1|root	1841			1	0
GUT_GENOME001882_01004	1098.46	UDP-N-acetylglucosamine 2-epimerase		TRUE	FALSE	1RPNC@1236|Gammaproteobacteria,1X4MZ@135614|Xanthomonadales,COG0381@1|root,COG0381@2|Bacteria,1MWZN@1224|Proteobacteria,COG0472@1|root,COG0472@2|Bacteria			M
GUT_GENOME001882_01254	1749.82	NDH-1 shuttles electrons from NADH, via FMN and iron- sulfur (Fe-S) centers, to quinones in the respiratory chain. The immediate electron acceptor for the enzyme in this species is believed to be ubiquinone. Couples the redox reaction to proton translocation (for every two electrons transferred, four hydrogen ions are translocated across the cytoplasmic membrane), and thus conserves the redox ene…	nuoL	TRUE	TRUE	1MW2M@1224|Proteobacteria,COG1009@2|Bacteria,1RNKN@1236|Gammaproteobacteria,COG1009@1|root,3XNJM@561|Escherichia			C,P
GUT_GENOME001882_01255	302.643	NDH-1 shuttles electrons from NADH, via FMN and iron- sulfur (Fe-S) centers, to quinones in the respiratory chain. The immediate electron acceptor for the enzyme in this species is believed to be ubiquinone. Couples the redox reaction to proton translocation (for every two electrons transferred, four hydrogen ions are translocated across the cytoplasmic membrane), and thus conserves the redox ene…	nuoK	TRUE	FALSE	1S6FN@1236|Gammaproteobacteria,COG0713@1|root,1RH0S@1224|Proteobacteria,COG0713@2|Bacteria,3WYKT@544|Citrobacter			C
GUT_GENOME001882_02152	792.667	Carbamoyl-phosphate synthetase glutamine chain	carA	FALSE	TRUE	COG0505@2|Bacteria,COG0505@1|root,1RMAW@1236|Gammaproteobacteria,1MUB9@1224|Proteobacteria	2127		E,F	0	1
GUT_GENOME001882_03250	1273.51	Plays an important role in the de novo pathway of purine nucleotide biosynthesis. Catalyzes the first committed step in the biosynthesis of AMP from IMP	purA	TRUE	TRUE	1MU5B@1224|Proteobacteria,COG0104@1|root,COG0104@2|Bacteria,1RNEW@1236|Gammaproteobacteria,3XNIR@561|Escherichia			F
GUT_GENOME001894_01235	682.705	Belongs to the BI1 family	ybhM	TRUE	FALSE	COG0670@2|Bacteria,1NN7Z@1224|Proteobacteria,1SIS9@1236|Gammaproteobacteria,COG0670@1|root,3XR8E@561|Escherichia	1928		P	1	0
GUT_GENOME001894_04152	1041.64	Tetratricopeptide repeats		TRUE	FALSE	COG4676@2|Bacteria,COG4676@1|root,COG0457@2|Bacteria,COG0457@1|root,1RZU4@1236|Gammaproteobacteria,1R4D7@1224|Proteobacteria	927		Q,R	0.0806452	0.016129
GUT_GENOME001899_03164	264	Catalyzes the tRNA-independent activation of glutamate in presence of ATP and the subsequent transfer of glutamate onto a tRNA(Asp). Glutamate is transferred on the 2-amino-5-(4,5- dihydroxy-2-cyclopenten-1-yl) moiety of the queuosine in the wobble position of the QUC anticodon	gluQ	TRUE	TRUE	COG0008@2|Bacteria,COG0008@1|root,3XN6X@561|Escherichia,1RMYQ@1236|Gammaproteobacteria,1MUN7@1224|Proteobacteria	154		J	1	1
GUT_GENOME001899_03287	438	Lytic transglycosylase with a strong preference for naked glycan strands that lack stem peptides	rlpA	TRUE	TRUE	COG0797@1|root,3XP5D@561|Escherichia,1RMCG@1236|Gammaproteobacteria,1MZ8S@1224|Proteobacteria,COG0797@2|Bacteria	266		M	1	1
GUT_GENOME001899_03389	935.388	protein acetylation	yiiD	TRUE	TRUE	COG0454@1|root,COG0456@2|Bacteria,1R407@1224|Proteobacteria,1RPJ2@1236|Gammaproteobacteria,3XP34@561|Escherichia			J,K,R
GUT_GENOME001899_04255	258	Activation of pyruvate formate-lyase 2 under anaerobic conditions by generation of an organic free radical, using S- adenosylmethionine and reduced flavodoxin as cosubstrates to produce 5'-deoxy-adenosine	ybiY	TRUE	TRUE	1RQUF@1236|Gammaproteobacteria,1QJHU@1224|Proteobacteria,3XP0Z@561|Escherichia,COG1180@2|Bacteria,COG1180@1|root	1557		O	1	1
GUT_GENOME002101_00047	3124.12	A helicase nuclease that prepares dsDNA breaks (DSB) for recombinational DNA repair. Binds to DSBs and unwinds DNA via a highly rapid and processive ATP-dependent bidirectional helicase activity. Unwinds dsDNA until it encounters a Chi (crossover hotspot instigator) sequence from the 3' direction. Cuts ssDNA a few nucleotides 3' to the Chi site. The properties and activities of the enzyme are cha…	recC	TRUE	TRUE	1MWTI@1224|Proteobacteria,COG1330@2|Bacteria,COG1330@1|root,3XMIF@561|Escherichia,1RNT0@1236|Gammaproteobacteria			L
GUT_GENOME002101_01609	476.679	DNA ligase that catalyzes the formation of phosphodiester linkages between 5'-phosphoryl and 3'-hydroxyl groups in double-stranded DNA using NAD as a coenzyme and as the energy source for the reaction. It is essential for DNA replication and repair of damaged DNA		TRUE	FALSE	COG0272@2|Bacteria,COG0272@1|root,1SDFQ@1236|Gammaproteobacteria,1R145@1224|Proteobacteria	1840		L	0.181818	0
GUT_GENOME002101_02379	456.916	Putative zinc- or iron-chelating domain	ycgN	TRUE	TRUE	1RHMX@1224|Proteobacteria,COG2983@1|root,1S5XU@1236|Gammaproteobacteria,COG2983@2|Bacteria,3XPDK@561|Escherichia			R
GUT_GENOME002101_03735	500.812	Chaperone required for proper molybdenum cofactor insertion and final assembly of the membrane-bound respiratory nitrate reductase 1. Required for the insertion of the molybdenum into the apo-NarG subunit, maybe by keeping NarG in an appropriate competent-open conformation for the molybdenum cofactor insertion to occur. NarJ maintains the apoNarGH complex in a soluble state. Upon insertion of the…	narJ	FALSE	TRUE	COG2180@1|root,COG2180@2|Bacteria,3XMJW@561|Escherichia,1RQ23@1236|Gammaproteobacteria,1MY4E@1224|Proteobacteria	2094		C,O,P	0	1
GUT_GENOME002154_00944	569.005	response to biotic stimulus	ygcP	TRUE	TRUE	1RQJJ@1236|Gammaproteobacteria,1R7RN@1224|Proteobacteria,3XM87@561|Escherichia,COG1954@1|root,COG1954@2|Bacteria	1145		K	1	1
GUT_GENOME002154_01404	927.131	galactose binding	ytfQ	TRUE	TRUE	1RRZV@1236|Gammaproteobacteria,COG1879@1|root,1MXJS@1224|Proteobacteria,COG1879@2|Bacteria,3XNEE@561|Escherichia			G
GUT_GENOME002154_02082	522.776	Fimbrial Subunit	bcfE	FALSE	TRUE	1S7H4@1236|Gammaproteobacteria,COG3539@1|root,COG3539@2|Bacteria,1RBMU@1224|Proteobacteria	2370		N,U	0	0.5
GUT_GENOME002154_02083	558.737	Fimbrial protein		FALSE	TRUE	1RCID@1224|Proteobacteria,1S38E@1236|Gammaproteobacteria,3XQQ8@561|Escherichia,COG3539@2|Bacteria,COG3539@1|root			N,U
GUT_GENOME002154_02086	704.519	Fimbrial protein		FALSE	TRUE	3XQQ0@561|Escherichia,COG3539@1|root,COG3539@2|Bacteria,1TGDS@1236|Gammaproteobacteria,1QIIY@1224|Proteobacteria			N,U
GUT_GENOME002154_02330	1306.17	Uncharacterised MFS-type transporter YbfB	pcaK	TRUE	TRUE	COG2271@1|root,1P24P@1224|Proteobacteria,1T1ID@1236|Gammaproteobacteria,3XQUY@561|Escherichia,COG2271@2|Bacteria			G
GUT_GENOME002154_02331	1007.14	Cupin domain	gtdA	TRUE	TRUE	1MVJP@1224|Proteobacteria,1RYBU@1236|Gammaproteobacteria,3XQSZ@561|Escherichia,COG3435@1|root,COG3435@2|Bacteria			Q
GUT_GENOME002154_02333	642.809	Glutathione S-transferase, C-terminal domain	maiA	TRUE	TRUE	COG0625@1|root,3XQTY@561|Escherichia,COG0625@2|Bacteria,1S2I8@1236|Gammaproteobacteria,1RA4Y@1224|Proteobacteria			O
GUT_GENOME002154_03062	571.333	Flavodoxin-like fold		FALSE	TRUE	1NN4C@1224|Proteobacteria,1RY3B@1236|Gammaproteobacteria,COG2249@1|root,COG2249@2|Bacteria,3X2AM@547|Enterobacter	1485		R	0.2	0.866667
GUT_GENOME002154_03063	449.179	metal-dependent hydrolase of the TIM-barrel fold		FALSE	TRUE	1MXI7@1224|Proteobacteria,COG2159@1|root,1T0VK@1236|Gammaproteobacteria,COG2159@2|Bacteria	1485		G	0.2	0.866667
GUT_GENOME002185_00710	493.796	SMI1-KNR4 cell-wall		FALSE	TRUE	28PH9@1|root,4I7XX@91061|Bacilli,26Y2K@186822|Paenibacillaceae,1V3G4@1239|Firmicutes,2ZC7U@2|Bacteria
GUT_GENOME002185_00799	239.844	Iron-sulfur subunit of the xanthine dehydrogenase complex	yagT	FALSE	TRUE	COG2080@2|Bacteria,COG2080@1|root,3XNYV@561|Escherichia,1SYEX@1236|Gammaproteobacteria,1MY3F@1224|Proteobacteria			C,F
GUT_GENOME002185_00835	618.039	Transposase and inactivated derivatives		TRUE	TRUE	3XPJ2@561|Escherichia,1QICA@1224|Proteobacteria,1TG6Q@1236|Gammaproteobacteria,COG2801@1|root,COG2801@2|Bacteria			L,X
GUT_GENOME002185_00880	1667.98	Arsenical pump-driving ATPase	arsA	FALSE	TRUE	COG0003@1|root,COG0003@2|Bacteria,1RRFQ@1236|Gammaproteobacteria,1MUTX@1224|Proteobacteria			P
GUT_GENOME002185_01451	446.271			FALSE	TRUE	1TCSR@1236|Gammaproteobacteria,33NUS@2|Bacteria,2EVEC@1|root,1PBRR@1224|Proteobacteria,1MT69@122277|Pectobacterium
GUT_GENOME002185_01453	530.257			FALSE	TRUE
GUT_GENOME002185_01508	528.117			FALSE	TRUE	1RFIU@1224|Proteobacteria,1S5N4@1236|Gammaproteobacteria,2DKV1@1|root,30EPT@2|Bacteria
GUT_GENOME002185_01629	855.246	Mechanosensitive channel that participates in the regulation of osmotic pressure changes within the cell, opening in response to stretch forces in the membrane lipid bilayer, without the need for other proteins. Contributes to normal resistance to hypoosmotic shock. Forms an ion channel of 1.0 nanosiemens conductance with a slight preference for anions. The channel is sensitive to voltage	mscS	TRUE	TRUE	COG0668@2|Bacteria,1RQZP@1236|Gammaproteobacteria,1N596@1224|Proteobacteria,COG0668@1|root,3XMPN@561|Escherichia			M
GUT_GENOME002185_01630	1019.95	carbohydrate transport		FALSE	TRUE	COG1638@1|root,COG1638@2|Bacteria			G
GUT_GENOME002185_01640	260.921	Protein of unknown function (DUF1471)		TRUE	TRUE	2E4GN@1|root,1MZS8@1224|Proteobacteria,1S94M@1236|Gammaproteobacteria,32ZBU@2|Bacteria,3X2T6@547|Enterobacter	1359			0.409396	0.0268456
GUT_GENOME002185_01877	233.339	Toxic component of a type I toxin-antitoxin (TA) system. Upon overexpression inhibits growth and reduces colony-forming units in both the presence and absence of the Rac prophage, cells become filamentous. Has deoxyribonuclease activity (probably endonucleolytic), does not digest RNA. Its toxic effects are neutralized by sRNA antitoxin RalA, which is encoded in trans on the opposite DNA strand. H…	lar	TRUE	FALSE	349DV@2|Bacteria,2FHJY@1|root,1SSFP@1236|Gammaproteobacteria,1P1C7@1224|Proteobacteria	2259		L	1	0
GUT_GENOME002185_01992	1281.3	The phosphoenolpyruvate-dependent sugar phosphotransferase system (sugar PTS), a major carbohydrate active transport system, catalyzes the phosphorylation of incoming sugar substrates concomitantly with their translocation across the cell membrane. The enzyme II UlaABC PTS system is involved in ascorbate transport		FALSE	TRUE	COG3037@1|root,COG3037@2|Bacteria,1MWNR@1224|Proteobacteria,1RP9S@1236|Gammaproteobacteria,3XME4@561|Escherichia			G
GUT_GENOME002185_01994	1371.41	Sulfatase		FALSE	TRUE	3XQA8@561|Escherichia,1MWY7@1224|Proteobacteria,1RZYW@1236|Gammaproteobacteria,COG3119@1|root,COG3119@2|Bacteria			P
GUT_GENOME002185_02182	997.541	PFAM Glycosyl transferases group 1		FALSE	TRUE	1V0EK@1239|Firmicutes,COG0438@2|Bacteria,COG0438@1|root,25BTX@186801|Clostridia			M
GUT_GENOME002185_02183	1164	Glycosyl transferases group 1		FALSE	TRUE	COG0438@1|root,COG0438@2|Bacteria,3XRDT@561|Escherichia,1RXGZ@1236|Gammaproteobacteria,1PFFK@1224|Proteobacteria			M
GUT_GENOME002185_02184	1387.91	Belongs to the mannose-6-phosphate isomerase type 2 family	cpsB	FALSE	TRUE	COG0836@2|Bacteria,1MV39@1224|Proteobacteria,1RNQI@1236|Gammaproteobacteria,1Z2M9@136846|Pseudomonas stutzeri group,COG0836@1|root			M
GUT_GENOME002185_02186	1303			FALSE	TRUE
GUT_GENOME002185_02187	1213.32	Polysaccharide biosynthesis protein		FALSE	TRUE	1V8VR@1239|Firmicutes,1ZJZ5@1386|Bacillus,COG2244@1|root,4HNZI@91061|Bacilli,COG2244@2|Bacteria			M
GUT_GENOME002185_02316	1122.91			FALSE	TRUE	430PZ@68525|delta/epsilon subdivisions,1N800@1224|Proteobacteria,28IEP@1|root,2WVK5@28221|Deltaproteobacteria,2Z8GP@2|Bacteria
GUT_GENOME002185_02317	540	In vivo, quickly hydrolyzes the ureidoacrylate peracid to avoid toxicity, but can also hydrolyzes ureidoacrylate that is formed spontaneously from ureidoacrylate peracid. One of the products of hydrolysis, carbamate, hydrolyzes spontaneously, thereby releasing one of the pyrimidine rings nitrogen atoms as ammonia and one of its carbons as CO2	rutB	FALSE	TRUE	1RP6J@1236|Gammaproteobacteria,1MV0W@1224|Proteobacteria,COG1335@1|root,COG1335@2|Bacteria			H,Q,R
GUT_GENOME002185_02319	216	DNA excision		FALSE	TRUE	COG3311@2|Bacteria,COG3311@1|root			K,X
GUT_GENOME002185_02328	425.09			FALSE	TRUE	4HYXG@91061|Bacilli,1VZKD@1239|Firmicutes,270IK@186822|Paenibacillaceae,2E5F5@1|root,3306Y@2|Bacteria
GUT_GENOME002185_02330	476.682			FALSE	TRUE
GUT_GENOME002185_02331	302.861			FALSE	TRUE	2DSCV@1|root,33FK8@2|Bacteria
GUT_GENOME002185_02332	573.799			FALSE	TRUE	4P2NQ@976|Bacteroidetes,33U2A@2|Bacteria,1I8MB@117743|Flavobacteriia,2F10R@1|root
GUT_GENOME002185_02859	309			FALSE	TRUE
GUT_GENOME002185_03026	1530.45	Activates the small RNA gene sgrS under glucose- phosphate stress conditions as well as yfdZ. Represses its own transcription under both stress and non-stress conditions. Might act as a sensor of the intracellular accumulation of phosphoglucose by binding these molecules in its C-terminal solute-binding domain		FALSE	TRUE	COG4533@2|Bacteria,COG4533@1|root,3WWN0@544|Citrobacter,1RP2Z@1236|Gammaproteobacteria,1N2NK@1224|Proteobacteria			K
GUT_GENOME002185_03029	557.422	SIS domain		FALSE	TRUE	COG0794@2|Bacteria,COG0794@1|root,1RNAS@1236|Gammaproteobacteria,1RAT6@1224|Proteobacteria,3WZKZ@544|Citrobacter			G,M
GUT_GENOME002185_03031	1126.1	restriction endodeoxyribonuclease activity		FALSE	TRUE	COG1401@2|Bacteria,COG1401@1|root			V
GUT_GENOME002185_03032	992.086	Oxidoreductase family, NAD-binding Rossmann fold		FALSE	TRUE	COG0673@2|Bacteria,COG0673@1|root,3ZN16@590|Salmonella,1RWPF@1236|Gammaproteobacteria,1RII8@1224|Proteobacteria			R
GUT_GENOME002185_03033	949.206	Sorbitol phosphotransferase enzyme II N-terminus		FALSE	TRUE	COG3732@2|Bacteria,COG3732@1|root,1SK1K@1236|Gammaproteobacteria,1QJR2@1224|Proteobacteria,3ZN3A@590|Salmonella			G
GUT_GENOME002185_03035	521.65	PTS system enzyme II sorbitol-specific factor		FALSE	TRUE	1NRX3@1224|Proteobacteria,COG3730@2|Bacteria,COG3730@1|root,3ZN7P@590|Salmonella,1SMWA@1236|Gammaproteobacteria			G
GUT_GENOME002185_03143	990.046	Evidence 4 Homologs of previously reported genes of		FALSE	TRUE	1KE84@119060|Burkholderiaceae,1N4SH@1224|Proteobacteria,2DMJQ@1|root,2VVKF@28216|Betaproteobacteria,32S16@2|Bacteria
GUT_GENOME002185_03144	314.571	Domain of unknown function (DUF4150)		FALSE	TRUE	COG1475@2|Bacteria,COG1475@1|root,1RIT4@1224|Proteobacteria			D,K
GUT_GENOME002185_03145	1027.81			FALSE	TRUE	2VVKF@28216|Betaproteobacteria,32S16@2|Bacteria,2DMJQ@1|root,1N4SH@1224|Proteobacteria
GUT_GENOME002185_03147	300	Domain of unknown function (DUF4150)		FALSE	TRUE	COG1475@1|root,1SDFV@1236|Gammaproteobacteria,COG1475@2|Bacteria,1RIT4@1224|Proteobacteria			D,K
GUT_GENOME002185_03804	821.365	Glycosyl transferase family 2	gtrB	FALSE	TRUE	COG0463@1|root,COG0463@2|Bacteria,1RPCE@1236|Gammaproteobacteria,1MWE5@1224|Proteobacteria,3ZN44@590|Salmonella			M
GUT_GENOME002185_03806	403.921	Caudovirales tail fibre assembly protein, lambda gpK		FALSE	TRUE	COG2110@1|root,COG2110@2|Bacteria,1T4DI@1236|Gammaproteobacteria,1R01E@1224|Proteobacteria,3X45A@547|Enterobacter			J
GUT_GENOME002244_00589	747.039	This protein is one of the repressors that regulate the expression of deoCABD genes, which encode nucleotide and deoxy ribonucleotide catabolizing enzymes. It also negatively regulates the expression of nupG (a transport protein) and tsx (a pore- forming protein). The inducer is deoxyribose-5-phosphate	deoR	TRUE	TRUE	1RR32@1236|Gammaproteobacteria,3XN6U@561|Escherichia,1MY40@1224|Proteobacteria,COG1349@2|Bacteria,COG1349@1|root			G,K
GUT_GENOME002244_01327	609.199	Protein of unknown function (DUF1391)		TRUE	FALSE	3XR7K@561|Escherichia,1QIQB@1224|Proteobacteria,1TGJN@1236|Gammaproteobacteria,31KUZ@2|Bacteria,2E72D@1|root	2259			1	0
GUT_GENOME002244_01793	353.409	FabA-like domain		FALSE	TRUE	COG0764@2|Bacteria,COG0764@1|root,3XR5X@561|Escherichia,1S6CJ@1236|Gammaproteobacteria,1NAA7@1224|Proteobacteria	1470		I	0	0.125
GUT_GENOME002244_01846	2380.43	PapC N-terminal domain		FALSE	TRUE	1RMPU@1236|Gammaproteobacteria,COG3188@2|Bacteria,1MUHE@1224|Proteobacteria,COG3188@1|root,3XQGI@561|Escherichia	2370		N,U,W	0	0.5
GUT_GENOME002244_02195	243	transcriptional regulators containing the CopG Arc MetJ DNA-binding domain	parD	TRUE	FALSE	COG3609@1|root,1SCVS@1236|Gammaproteobacteria,COG3609@2|Bacteria,1N9NJ@1224|Proteobacteria			K
GUT_GENOME002244_02196	282	Plasmid stabilization system		TRUE	FALSE	COG3668@2|Bacteria,COG3668@1|root			D,X
GUT_GENOME002244_03020	3310.45	Proposed nucleic acid binding domain	JD73_20480	FALSE	TRUE	COG3831@2|Bacteria,1S9SY@1236|Gammaproteobacteria,COG3831@1|root,3XNVN@561|Escherichia,1QWC3@1224|Proteobacteria	656		K	0	1
GUT_GENOME002244_03632	474.296	Iron-storage protein, whose ferroxidase center binds Fe(2 ) ions, oxidizes them by dioxygen to Fe(3 ), and participates in the subsequent Fe(3 ) oxide mineral core formation within the central cavity of the protein complex	bfr	TRUE	TRUE	1S45S@1236|Gammaproteobacteria,1RCW7@1224|Proteobacteria,COG2193@1|root,COG2193@2|Bacteria	2512		P	1	1
GUT_GENOME002244_03767	1433.43	Protein of unknown function (DUF1266)		FALSE	TRUE	1SFEF@1236|Gammaproteobacteria,1NI20@1224|Proteobacteria,33ENS@2|Bacteria,2EKZ9@1|root
GUT_GENOME002244_04190	1652.96	Belongs to the TPP enzyme family	poxB	TRUE	TRUE	COG0028@1|root,1MWKP@1224|Proteobacteria,COG0028@2|Bacteria,1RNYT@1236|Gammaproteobacteria,3XNU3@561|Escherichia			C,E,H
GUT_GENOME002260_00829	1115.89	Major Facilitator		TRUE	TRUE	COG2814@2|Bacteria,1RB5E@1224|Proteobacteria,COG0477@1|root,1RYS9@1236|Gammaproteobacteria	1461		E,G,P,R	1	1
GUT_GENOME002260_04421	545.672	Belongs to the aspartokinase family	lysC	TRUE	TRUE	1MW3H@1224|Proteobacteria,COG0527@1|root,COG0527@2|Bacteria,1RMJ6@1236|Gammaproteobacteria,3XMQD@561|Escherichia			E
GUT_GENOME002268_00502	1802.27	protein conserved in bacteria		TRUE	FALSE	COG4688@1|root,3NMZI@468|Moraxellaceae,1RPJV@1236|Gammaproteobacteria,1P0NM@1224|Proteobacteria,COG4688@2|Bacteria
GUT_GENOME002268_00505	213			TRUE	FALSE	4QHC1@10239|Viruses,4QKW0@10699|Siphoviridae,4QSRB@28883|Caudovirales
GUT_GENOME002268_00880	201	Bacteriophage holin family HP1		FALSE	TRUE	2E83Y@1|root,1NFBD@1224|Proteobacteria,332HR@2|Bacteria,1SFGW@1236|Gammaproteobacteria
GUT_GENOME002268_00892	257.25			FALSE	TRUE
GUT_GENOME002268_00896	228			FALSE	TRUE
GUT_GENOME002268_00898	231			FALSE	TRUE
GUT_GENOME002268_00899	364.418			FALSE	TRUE
GUT_GENOME002268_00910	754.77	methyltransferase activity		FALSE	TRUE	4QRJE@28883|Caudovirales,4QM4W@10699|Siphoviridae,4QE8Z@10239|Viruses,4QXJU@35237|dsDNA viruses no RNA stage
GUT_GENOME002268_00914	259.255			FALSE	TRUE	4QS7F@28883|Caudovirales,4QUN7@35237|dsDNA viruses no RNA stage,4QME3@10699|Siphoviridae,4QCMT@10239|Viruses
GUT_GENOME002268_00916	204			FALSE	TRUE
GUT_GENOME002268_00918	219			FALSE	TRUE
GUT_GENOME002268_00919	610.935			FALSE	TRUE
GUT_GENOME002268_00920	333			FALSE	TRUE
GUT_GENOME002268_01258	355.935	Belongs to the ArsC family	yffB	TRUE	TRUE	COG1393@2|Bacteria,COG1393@1|root,1S8TR@1236|Gammaproteobacteria,1MZ6S@1224|Proteobacteria,3XPW3@561|Escherichia			P
GUT_GENOME002268_01268	246			TRUE	FALSE
GUT_GENOME002268_01299	803.718	KR domain		TRUE	FALSE	COG1028@2|Bacteria,1TP2V@1239|Firmicutes,4B0JI@81852|Enterococcaceae,COG1028@1|root,4HCAG@91061|Bacilli			I,Q
GUT_GENOME002268_01300	1427.82	PTS system, Lactose/Cellobiose specific IIB subunit		TRUE	FALSE	COG4668@2|Bacteria,COG4668@1|root,COG2213@2|Bacteria,COG2213@1|root,4HUCH@91061|Bacilli,4B1JC@81852|Enterococcaceae,1TPE3@1239|Firmicutes			G
GUT_GENOME002268_01301	427.446	PTS mannitol transporter subunit IIA	mtlF	TRUE	FALSE	26YNK@186822|Paenibacillaceae,1V77P@1239|Firmicutes,4HIM2@91061|Bacilli,COG4668@1|root,COG4668@2|Bacteria			G
GUT_GENOME002268_01302	685.588	DeoR C terminal sensor domain		TRUE	FALSE	1UYMW@1239|Firmicutes,COG1349@2|Bacteria,4HBQ1@91061|Bacilli,COG1349@1|root			G,K
GUT_GENOME002268_01303	1170.98	Mannitol dehydrogenase C-terminal domain		TRUE	FALSE	COG0246@2|Bacteria,COG0246@1|root,4HTKF@91061|Bacilli,1TS6C@1239|Firmicutes,4B1E9@81852|Enterococcaceae			G
GUT_GENOME002268_01304	288	Bifunctional PTS system fructose-specific transporter subunit IIA HPr protein	fruB	TRUE	FALSE	COG4668@2|Bacteria,COG4668@1|root,COG1925@2|Bacteria,1MVP6@1224|Proteobacteria,1RQP4@1236|Gammaproteobacteria,COG1925@1|root			G,T
GUT_GENOME002268_01391	1031.68	Flagellar hook-length control protein FliK	lafE	TRUE	TRUE	COG3144@2|Bacteria,COG3144@1|root,1N86W@1224|Proteobacteria,1SER0@1236|Gammaproteobacteria,3XR4X@561|Escherichia	2397		N	0.970588	1
GUT_GENOME002268_01443	1405.16	it exhibits DNA-dependent ATPase activity and contains distinct active sites for ATP binding, DNA binding, and interaction with DnaC protein, primase, and other prepriming proteins		FALSE	TRUE	COG0305@2|Bacteria,COG0305@1|root,1MUG9@1224|Proteobacteria,3ZKBR@590|Salmonella,1RPM2@1236|Gammaproteobacteria			F,L
GUT_GENOME002268_01444	554			FALSE	TRUE
GUT_GENOME002268_01556	363.45	Belongs to the adenylyl cyclase class-1 family	cyaA	TRUE	FALSE	1PI5T@1224|Proteobacteria,1RMPZ@1236|Gammaproteobacteria,COG3072@1|root,COG3072@2|Bacteria,3XMBV@561|Escherichia			F,T
GUT_GENOME002268_01638	580.161			TRUE	TRUE	1SD6Y@1236|Gammaproteobacteria,3NRWA@468|Moraxellaceae,3342T@2|Bacteria,2E9X2@1|root,1NAAT@1224|Proteobacteria
GUT_GENOME002268_01639	969.859			TRUE	TRUE	1SEPE@1236|Gammaproteobacteria,1N9NZ@1224|Proteobacteria,2EB1U@1|root,3352M@2|Bacteria	545			0.210526	0.105263
GUT_GENOME002268_01640	453.151	Helix-turn-helix XRE-family like proteins		TRUE	TRUE	1N81W@1224|Proteobacteria,1SDIH@1236|Gammaproteobacteria,COG1396@2|Bacteria,COG1396@1|root	545		K	0.210526	0.105263
GUT_GENOME002268_01840	597	tRNA-splicing ligase RtcB	rtcB	TRUE	FALSE	1MS98@122277|Pectobacterium,COG1690@2|Bacteria,COG1690@1|root,1SZV8@1236|Gammaproteobacteria,1Q1SR@1224|Proteobacteria			J
GUT_GENOME002268_02631	617.217	The phosphoenolpyruvate-dependent sugar phosphotransferase system (PTS), a major carbohydrate active -transport system, catalyzes the phosphorylation of incoming sugar substrates concomitant with their translocation across the cell membrane	frwC	TRUE	FALSE	1P0NB@1224|Proteobacteria,1RPQZ@1236|Gammaproteobacteria,3XNJ3@561|Escherichia,COG1299@1|root,COG1299@2|Bacteria			G
GUT_GENOME002268_02968	457.611	Colicin I receptor	cirA	TRUE	FALSE	1MUC1@1224|Proteobacteria,1RNHR@1236|Gammaproteobacteria,3XM4N@561|Escherichia,COG4771@2|Bacteria,COG1629@1|root			P
GUT_GENOME002268_03087	736.529	Belongs to the short-chain dehydrogenases reductases (SDR) family		TRUE	FALSE	1MWXS@1224|Proteobacteria,1RQSN@1236|Gammaproteobacteria,COG4221@2|Bacteria,COG4221@1|root			C
GUT_GENOME002268_03088	474.135	Domain of unknown function (DUF386)		TRUE	FALSE	COG2731@2|Bacteria,COG2731@1|root,1PYYI@1224|Proteobacteria,1SNY5@1236|Gammaproteobacteria			G
GUT_GENOME002268_03089	928.51	Catalyzes the NADPH-dependent reduction of glyoxylate and hydroxypyruvate into glycolate and glycerate, respectively		TRUE	FALSE	COG1052@2|Bacteria,COG1052@1|root,3WX2C@544|Citrobacter,1MU2D@1224|Proteobacteria,1RMGZ@1236|Gammaproteobacteria			C,H,R
GUT_GENOME002268_03135	651	HAD-superfamily hydrolase subfamily IA, variant 3	yniC	TRUE	FALSE	1NF90@1224|Proteobacteria,1RNP8@1236|Gammaproteobacteria,COG0637@1|root,COG0637@2|Bacteria			G
GUT_GENOME002268_03136	556.021	sugar phosphate isomerase involved in capsule formation		TRUE	FALSE	COG0794@2|Bacteria,COG0794@1|root,1RNAS@1236|Gammaproteobacteria,1RAT6@1224|Proteobacteria			G,M
GUT_GENOME002268_03137	708.196	ribulose-phosphate 3-epimerase activity	rpe	TRUE	FALSE	COG0036@2|Bacteria,COG0036@1|root			G
GUT_GENOME002268_03262	792.545			TRUE	FALSE	1SNHD@1236|Gammaproteobacteria,33P7R@2|Bacteria,2EVTZ@1|root,1NVGB@1224|Proteobacteria
GUT_GENOME002268_03689	225			FALSE	TRUE
GUT_GENOME002268_03693	291			FALSE	TRUE
GUT_GENOME002268_03694	641.815	repressor		FALSE	TRUE	1S49C@1236|Gammaproteobacteria,1RHIM@1224|Proteobacteria,COG1974@1|root,COG1974@2|Bacteria			K,T
GUT_GENOME002268_03695	276.538	Helix-turn-helix domain		FALSE	TRUE	1RGKD@1224|Proteobacteria,1S53G@1236|Gammaproteobacteria,COG0640@1|root,COG0640@2|Bacteria			K
GUT_GENOME002268_03709	561.569	protein conserved in bacteria	ybiA	TRUE	FALSE	COG5113@1|root,COG3236@2|Bacteria,1S4UM@1236|Gammaproteobacteria,1RCXE@1224|Proteobacteria			H,O,V
GUT_GENOME002268_03731	284.4	Cytochrome c-type biogenesis protein	nrfE	TRUE	FALSE	COG1138@1|root,COG1138@2|Bacteria,1QU6F@1224|Proteobacteria,1RYR7@1236|Gammaproteobacteria,3XMP3@561|Escherichia	333		C,O	1	0
GUT_GENOME002268_03795	1049.94	PFAM Cys Met metabolism	mdeA	TRUE	FALSE	1MU57@1224|Proteobacteria,1RMCV@1236|Gammaproteobacteria,3X0TE@547|Enterobacter,COG0626@1|root,COG0626@2|Bacteria			E
GUT_GENOME002268_03913	367.145	Chaperone of endosialidase		TRUE	FALSE	1RFTZ@1224|Proteobacteria,1S5HN@1236|Gammaproteobacteria,29VP9@1|root,30H6M@2|Bacteria,3XRFK@561|Escherichia
GUT_GENOME002268_03915	354			TRUE	FALSE	1NDW3@1224|Proteobacteria,1SEJS@1236|Gammaproteobacteria,2E5MA@1|root,330C8@2|Bacteria
GUT_GENOME002268_03916	1754.16	Pfam Sulfatase		TRUE	FALSE	1RG6W@1224|Proteobacteria,1RY34@1236|Gammaproteobacteria,COG1368@1|root,COG1368@2|Bacteria			M
GUT_GENOME002268_03935	640.412	Catalyzes the last two steps in the biosynthesis of 5- methylaminomethyl-2-thiouridine (mnm(5)s(2)U) at the wobble position (U34) in tRNA. Catalyzes the FAD-dependent demodification of cmnm(5)s(2)U34 to nm(5)s(2)U34, followed by the transfer of a methyl group from S-adenosyl-L-methionine to nm(5)s(2)U34, to form mnm(5)s(2)U34	mnmC	TRUE	FALSE	1MZW5@1224|Proteobacteria,1RMTE@1236|Gammaproteobacteria,3XMNY@561|Escherichia,COG4121@2|Bacteria,COG4121@1|root,COG0665@2|Bacteria,COG0665@1|root			E,J
GUT_GENOME002268_04037	387			FALSE	TRUE	4QF97@10239|Viruses,4QMZE@10699|Siphoviridae,4QRX5@28883|Caudovirales,4QUYI@35237|dsDNA viruses no RNA stage
GUT_GENOME002268_04039	369			FALSE	TRUE	4R00K@35237|dsDNA viruses no RNA stage,4QRY9@28883|Caudovirales,4QN50@10699|Siphoviridae,4QFJB@10239|Viruses
GUT_GENOME002268_04263	270	Belongs to the prokaryotic molybdopterin-containing oxidoreductase family	ydeP	TRUE	TRUE	COG0243@2|Bacteria,COG0243@1|root,3XNYR@561|Escherichia,1RNXW@1236|Gammaproteobacteria,1MU6B@1224|Proteobacteria			C
GUT_GENOME002331_03347	1246.24	regulation of nucleic acid-templated transcription	csiE	TRUE	TRUE	COG3711@2|Bacteria,COG3711@1|root,1RN8B@1236|Gammaproteobacteria,1NFZH@1224|Proteobacteria,3XMR7@561|Escherichia			K
GUT_GENOME002331_03982	620.182	Member of the two-component regulatory system EnvZ OmpR involved in the regulation of osmoregulation (genes ompF and ompC). EnvZ functions as a membrane-associated protein kinase that phosphorylates OmpR in response to environmental signals	envZ	TRUE	FALSE	COG2205@2|Bacteria,COG0642@1|root,3XNPN@561|Escherichia,1RPP2@1236|Gammaproteobacteria,1MUAK@1224|Proteobacteria			T
GUT_GENOME002331_03991	260.25			TRUE	TRUE		129			0.615385	1
GUT_GENOME002335_02042	916.293	Catalyzes the conversion of 3'-phosphate to a 2',3'- cyclic phosphodiester at the end of RNA. The mechanism of action of the enzyme occurs in 3 steps (A) adenylation of the enzyme by ATP	rtcA	TRUE	TRUE	COG0430@2|Bacteria,COG0430@1|root,1RSFF@1236|Gammaproteobacteria,1MX7Q@1224|Proteobacteria,3XMP7@561|Escherichia			A
GUT_GENOME002335_04160	653.923	Catalyzes the reversible phosphorylytic cleavage of uridine and deoxyuridine to uracil and ribose- or deoxyribose-1- phosphate. The produced molecules are then utilized as carbon and energy sources or in the rescue of pyrimidine bases for nucleotide synthesis	udp	FALSE	TRUE	COG2820@1|root,3XN82@561|Escherichia,1RN3N@1236|Gammaproteobacteria,1P0EC@1224|Proteobacteria,COG2820@2|Bacteria	1434		F	0	1
GUT_GENOME002346_02338	741.731	response to ionizing radiation	yhgF	TRUE	TRUE	COG2183@2|Bacteria,COG2183@1|root,3XMBH@561|Escherichia,1RMNH@1236|Gammaproteobacteria,1MUA7@1224|Proteobacteria	1926		K	1	1
GUT_GENOME002379_02787	630.549	metallopeptidase activity	ygeY	FALSE	TRUE	3XNF6@561|Escherichia,1N20R@1224|Proteobacteria,1RYRN@1236|Gammaproteobacteria,COG0624@2|Bacteria,COG0624@1|root	2294		E	0	1
GUT_GENOME002379_03345	912.905	Zinc phosphodiesterase, which displays some tRNA 3'- processing endonuclease activity. Probably involved in tRNA maturation, by removing a 3'-trailer from precursor tRNA	rnz	TRUE	TRUE	1Q4PW@1224|Proteobacteria,1RR5K@1236|Gammaproteobacteria,COG1234@1|root,COG1234@2|Bacteria			J
GUT_GENOME002379_03691	483.463	Belongs to the acetyltransferase family. ArgA subfamily	argA	TRUE	TRUE	1MUUP@1224|Proteobacteria,COG1246@2|Bacteria,COG1246@1|root,COG0548@2|Bacteria,COG0548@1|root,3XMQ7@561|Escherichia,1RMV5@1236|Gammaproteobacteria			E
GUT_GENOME002379_03782	264.622	colanic acid metabolic process	mcbA	TRUE	TRUE	3333J@2|Bacteria,1ND9B@1224|Proteobacteria,1SEHC@1236|Gammaproteobacteria,2DPRH@1|root
GUT_GENOME002379_03842	411.336	Belongs to the citrate synthase family	gltA	TRUE	FALSE	COG0372@1|root,COG0372@2|Bacteria,3XMKA@561|Escherichia,1RNDK@1236|Gammaproteobacteria,1MUKX@1224|Proteobacteria			C
GUT_GENOME002392_03592	1439.57	YadA-like membrane anchor domain		FALSE	TRUE	COG5295@2|Bacteria,1SBVV@1236|Gammaproteobacteria,1N22I@1224|Proteobacteria,3XQS7@561|Escherichia,COG5295@1|root	1487		U,W	0	0.166667
GUT_GENOME002392_04565	763.621	Type VI secretion system protein DotU	icmH	FALSE	TRUE	3XQXV@561|Escherichia,COG3455@2|Bacteria,COG3455@1|root,1S2PW@1236|Gammaproteobacteria,1MU13@1224|Proteobacteria	878		N,U	0	1
GUT_GENOME002450_00770	1170.18	Pfam:Arm-DNA-bind_3		FALSE	TRUE	4QKXA@10699|Siphoviridae,4QUYF@35237|dsDNA viruses no RNA stage,4QU2B@28883|Caudovirales,4QAQE@10239|Viruses
GUT_GENOME002450_00771	231			FALSE	TRUE
GUT_GENOME002450_00774	431.446	NinB protein		FALSE	TRUE	32YYI@2|Bacteria,1N7UA@1224|Proteobacteria,2C58H@1|root,1JY06@119045|Methylobacteriaceae,2V22V@28211|Alphaproteobacteria
GUT_GENOME002450_00780	842.276	Restriction endonuclease		FALSE	TRUE	COG3440@1|root,COG3440@2|Bacteria,4NZX4@976|Bacteroidetes,2FQCP@200643|Bacteroidia			V
GUT_GENOME002450_00792	272.898			FALSE	TRUE
GUT_GENOME002450_00798	234.833			FALSE	TRUE
GUT_GENOME002450_00832	227.64			FALSE	TRUE
GUT_GENOME002450_00834	491.8	Phage lysozyme		FALSE	TRUE	4QVA0@35237|dsDNA viruses no RNA stage,4QPIJ@28883|Caudovirales,4QAVB@10239|Viruses,4QNHZ@10744|Podoviridae
GUT_GENOME002450_00844	425.674			FALSE	TRUE	28R0E@1|root,1S3CK@1236|Gammaproteobacteria,1RCQU@1224|Proteobacteria,2ZDF4@2|Bacteria
GUT_GENOME002450_00845	1034.95			FALSE	TRUE	4QQNG@28883|Caudovirales,4QM54@10699|Siphoviridae,4QGIT@10239|Viruses,4QZC0@35237|dsDNA viruses no RNA stage
GUT_GENOME002450_00855	255			FALSE	TRUE
GUT_GENOME002450_00857	354	Phage minor tail protein		FALSE	TRUE	4QCRY@10239|Viruses,4QKNG@10699|Siphoviridae,4QQ90@28883|Caudovirales,4QUUH@35237|dsDNA viruses no RNA stage
GUT_GENOME002450_00859	249			FALSE	TRUE
GUT_GENOME002450_00861	348.857			FALSE	TRUE
GUT_GENOME002450_00863	701.81	Phage minor tail protein L		FALSE	TRUE	4QW2U@35237|dsDNA viruses no RNA stage,4QC9C@10239|Viruses,4QKMD@10699|Siphoviridae,4QPG4@28883|Caudovirales
GUT_GENOME002450_00864	731.381	JAB/MPN domain	JD73_18915	FALSE	TRUE	1N05J@1224|Proteobacteria,COG1310@2|Bacteria,COG1310@1|root,COG0791@2|Bacteria,1RPP6@1236|Gammaproteobacteria,COG0791@1|root,3XPYI@561|Escherichia			M,O
GUT_GENOME002450_00865	517.477	virus tail assembly		FALSE	TRUE	4QKQJ@10699|Siphoviridae,4QCSK@10239|Viruses,4QWE2@35237|dsDNA viruses no RNA stage,4QPEA@28883|Caudovirales
GUT_GENOME002450_00869	267			FALSE	TRUE
GUT_GENOME002450_02842	231.691	Might be a regulator of the sodium-potassium proton antiporter ChaA	chaB	TRUE	TRUE	1N93H@1224|Proteobacteria,3XPYK@561|Escherichia,1S94E@1236|Gammaproteobacteria,COG4572@2|Bacteria,COG4572@1|root			K,P
GUT_GENOME002450_03173	1112.33	Belongs to the UDP-N-acetylglucosamine 2-epimerase family	neuC	TRUE	FALSE	COG0381@2|Bacteria,1MWZN@1224|Proteobacteria,COG0381@1|root	869		M	0.428571	0
GUT_GENOME002450_04137	309.554		ymdA	TRUE	TRUE	2DK8X@1|root,308WD@2|Bacteria,1RW4W@1236|Gammaproteobacteria,1QSMU@1224|Proteobacteria,3XQ21@561|Escherichia
GUT_GENOME002457_04026	231	Protein of unknown function (DUF2554)	yncJ	TRUE	TRUE	1SC16@1236|Gammaproteobacteria,2DTBF@1|root,1N3QK@1224|Proteobacteria,3XQ27@561|Escherichia,32UUW@2|Bacteria
GUT_GENOME002492_00251	557.75	Catalyzes the ATP-dependent amination of UTP to CTP with either L-glutamine or ammonia as the source of nitrogen. Regulates intracellular CTP levels through interactions with the four ribonucleotide triphosphates	pyrG	TRUE	TRUE	COG0504@1|root,COG0504@2|Bacteria,1MUIT@1224|Proteobacteria,1RM92@1236|Gammaproteobacteria,3XMET@561|Escherichia	2420		F	1	1
GUT_GENOME002492_00290	538.019	deoxyribonuclease I activity	endA	TRUE	TRUE	1MXQM@1224|Proteobacteria,1RPX9@1236|Gammaproteobacteria,3XN9S@561|Escherichia,COG2356@1|root,COG2356@2|Bacteria			L
GUT_GENOME002492_00476	592.167	Catalyzes the reduction of 1-pyrroline-5-carboxylate (PCA) to L-proline	proC	TRUE	TRUE	COG0345@1|root,1RNQK@1236|Gammaproteobacteria,1R5J1@1224|Proteobacteria,COG0345@2|Bacteria,3XPFV@561|Escherichia	294		E	1	1
GUT_GENOME002492_00491	1210.01	Involved in the biosynthesis of the siderophore enterobactin (enterochelin), which is a macrocyclic trimeric lactone of N-(2,3-dihydroxybenzoyl)-serine. The serine trilactone serves as a scaffolding for the three catechol functionalities that provide hexadentate coordination for the tightly ligated iron(2 ) atoms. EntE proccesses via a two-step adenylation- ligation reaction (bi-uni-uni-bi ping-p…	entE	TRUE	TRUE	COG1021@1|root,1RP8K@1236|Gammaproteobacteria,COG1021@2|Bacteria,1NSN8@1224|Proteobacteria,3XMDK@561|Escherichia			Q
GUT_GENOME002492_00869	562.43	Reutilizes the intact tripeptide L-alanyl-gamma-D- glutamyl-meso-diaminopimelate by linking it to UDP-N- acetylmuramate	mpl	TRUE	TRUE	1RMMT@1236|Gammaproteobacteria,1MUC5@1224|Proteobacteria,COG0773@1|root,COG0773@2|Bacteria,3XNY8@561|Escherichia	2113		M	1	1
GUT_GENOME002492_00927	267.673	Transposase and inactivated derivatives		TRUE	FALSE	1MVXQ@1224|Proteobacteria,1RPEW@1236|Gammaproteobacteria,COG2801@2|Bacteria,COG2801@1|root			L,X
GUT_GENOME002492_02098	221.956	sulfuric ester hydrolase activity	yejM	TRUE	TRUE	1MX6X@1224|Proteobacteria,1RPAU@1236|Gammaproteobacteria,3XP9R@561|Escherichia,COG3083@1|root,COG3083@2|Bacteria			M,T
GUT_GENOME002492_02416	735.639	Specifically methylates the adenine in position 37 of tRNA(1)(Val) (anticodon cmo5UAC)	yfiC	TRUE	TRUE	COG4123@1|root,1PC8R@1224|Proteobacteria,1RM8S@1236|Gammaproteobacteria,COG4123@2|Bacteria,3XM65@561|Escherichia			J
GUT_GENOME002557_00174	2263.88	Autotransporter beta-domain		FALSE	TRUE	1RP3E@1236|Gammaproteobacteria,1MV0K@1224|Proteobacteria,COG1292@1|root,COG1292@2|Bacteria			M
GUT_GENOME002557_01826	228			TRUE	TRUE
GUT_GENOME002557_02435	970.314	Part of the ABC transporter complex LsrABCD involved in autoinducer 2 (AI-2) import. Binds AI-2 and delivers it to the LsrC and LsrD permeases	lsrB	TRUE	TRUE	COG1879@1|root,1RXX7@1236|Gammaproteobacteria,3XPVP@561|Escherichia,COG1879@2|Bacteria,1MUAT@1224|Proteobacteria	2693		G	0.901099	0.901099
GUT_GENOME002618_01108	1663.51	Domain of unknown function (DUF4209)		FALSE	TRUE	COG1384@1|root,COG1384@2|Bacteria,1T62P@1236|Gammaproteobacteria,1R33M@1224|Proteobacteria,1Y0P0@135623|Vibrionales			J
GUT_GENOME002618_03524	2139.35	endonuclease which induces a single-strand cut and initiates DNA replication		TRUE	FALSE	4QY3V@35237|dsDNA viruses no RNA stage,4QHQH@10239|Viruses,4QK1N@10662|Myoviridae,4QSJF@28883|Caudovirales	1857			0.904762	0
GUT_GENOME002634_01926	257.908	Replication regulatory protein RepB		FALSE	TRUE	1SCJY@1236|Gammaproteobacteria,1NB02@1224|Proteobacteria,2EAHA@1|root,334KG@2|Bacteria,3WZQ9@544|Citrobacter	1719			0	1
GUT_GENOME002689_00437	492.954	Protein of unknown function (DUF2501)	yjjA	TRUE	TRUE	320SA@2|Bacteria,2B7M6@1|root,1N1I7@1224|Proteobacteria,1S9J1@1236|Gammaproteobacteria,3XPG7@561|Escherichia
GUT_GENOME002689_00824	1016.36	Catalyzes the stereospecific, NADPH-dependent reduction of L-glyceraldehyde 3-phosphate (L-GAP). The physiological role of gpr is the detoxification of L-GAP, which may be formed by non- enzymatic racemization of GAP. Also involved in the stress response as a methylglyoxal reductase which converts the toxic metabolite methylglyoxal to acetol in vitro and in vivo	yghZ	TRUE	TRUE	1MU1S@1224|Proteobacteria,1RMIG@1236|Gammaproteobacteria,COG0667@2|Bacteria,COG0667@1|root,3XMC7@561|Escherichia			C,H,R
GUT_GENOME002689_01411	253.901	Outer membrane heme hemoglobin receptor	hemR	TRUE	TRUE	1RQ2K@1236|Gammaproteobacteria,3XNUJ@561|Escherichia,COG1629@1|root,1MX42@1224|Proteobacteria,COG4771@2|Bacteria	1037		M,P	1	1
GUT_GENOME002689_01479	849.25			TRUE	FALSE	2Z89N@2|Bacteria,28I6R@1|root,1R906@1224|Proteobacteria	1522			1	0
GUT_GENOME002689_01751	740.694	Nucleoside-specific channel-forming protein, Tsx	yfeN	TRUE	FALSE	28ICJ@1|root,1RRVS@1236|Gammaproteobacteria,2Z8EW@2|Bacteria,1R4VQ@1224|Proteobacteria,3XQ4Z@561|Escherichia	1885			1	0
GUT_GENOME002689_01963	1088.91	involved in a type II secretion system (T2SS, formerly general secretion pathway, GSP) for the export of proteins	gspL	FALSE	TRUE	1NVVW@1224|Proteobacteria,1S01F@1236|Gammaproteobacteria,3XNEN@561|Escherichia,COG3297@1|root,COG3297@2|Bacteria	533		U	0	1
GUT_GENOME002689_02045	695.164	DTW	yfiP	TRUE	TRUE	1N8XY@1224|Proteobacteria,COG3148@2|Bacteria,COG3148@1|root,1RS6H@1236|Gammaproteobacteria			J
GUT_GENOME002689_02300	358.091	High-affinity gluconate transporter with fairly broad specificity, including low affinity for glucuronate, several disaccharides, and some hexoses, but not glucose	gntP	TRUE	TRUE	3XQH8@561|Escherichia,1MVK2@1224|Proteobacteria,1RZUF@1236|Gammaproteobacteria,COG2610@1|root,COG2610@2|Bacteria	1214		G,P	1	1
GUT_GENOME002689_02541	474	Catalyzes the phosphorylation of N-acetyl-D-glucosamine (GlcNAc) derived from cell-wall degradation, yielding GlcNAc-6-P	nagK	TRUE	TRUE	1MU94@1224|Proteobacteria,1RNHE@1236|Gammaproteobacteria,3XN5F@561|Escherichia,COG1940@1|root,COG1940@2|Bacteria			F,G,K
GUT_GENOME002689_02691	870.598	Increases the formation of ribosomal termination complexes and stimulates activities of RF-1 and RF-2. It binds guanine nucleotides and has strong preference for UGA stop codons. It may interact directly with the ribosome. The stimulation of RF- 1 and RF-2 is significantly reduced by GTP and GDP, but not by GMP	prfC	TRUE	TRUE	1MU7X@1224|Proteobacteria,COG4108@2|Bacteria,1RMFT@1236|Gammaproteobacteria,COG4108@1|root,3XNAI@561|Escherichia			J
GUT_GENOME002689_02737	414.864	Aminotransferase	hemL	TRUE	TRUE	COG0001@2|Bacteria,COG0001@1|root,3X08X@547|Enterobacter,1RM7N@1236|Gammaproteobacteria,1MUY5@1224|Proteobacteria			H
GUT_GENOME002689_02743	392.169	Catalyzes the interconversion between ADP-D-glycero- beta-D-manno-heptose and ADP-L-glycero-beta-D-manno-heptose via an epimerization at carbon 6 of the heptose	hldD	FALSE	TRUE	COG0451@2|Bacteria,1MVE4@1224|Proteobacteria,1RP2S@1236|Gammaproteobacteria,3X0JI@547|Enterobacter,COG0451@1|root	2344		G,M	0	1
GUT_GENOME002689_02803	239.327	Catalytic subunit of cellulose synthase. It polymerizes uridine 5'-diphosphate glucose to cellulose, which is produced as an extracellular component for mechanical and chemical protection at the onset of the stationary phase, when the cells exhibit multicellular behavior (rdar morphotype). Coexpression of cellulose and thin aggregative fimbriae	bcsA	FALSE	TRUE	COG1215@2|Bacteria,COG1215@1|root,1MWF8@1224|Proteobacteria,3XM9Y@561|Escherichia,1RPJ6@1236|Gammaproteobacteria	1064		M,N	0	1
GUT_GENOME002689_02869	901.161	Catalyzes the conversion of L-arabinose to L-ribulose	araA	TRUE	TRUE	1MW0J@1224|Proteobacteria,1RQEF@1236|Gammaproteobacteria,3XN18@561|Escherichia,COG2160@1|root,COG2160@2|Bacteria	177		G	1	1
GUT_GENOME002713_00650	1423.82	negative regulation of cell motility	yeaI	TRUE	TRUE	1T2TE@1236|Gammaproteobacteria,COG2199@2|Bacteria,1RGCV@1224|Proteobacteria,COG2199@1|root,3XPCJ@561|Escherichia			T
GUT_GENOME002713_00942	1098.47	CoA transferase having broad substrate specificity for short-chain acyl-CoA thioesters with the activity decreasing when the length of the carboxylic acid chain exceeds four carbons	ydiF	TRUE	FALSE	1MUJW@1224|Proteobacteria,1RP80@1236|Gammaproteobacteria,3XN8Y@561|Escherichia,COG4670@1|root,COG4670@2|Bacteria	1899		I	1	0
GUT_GENOME002713_02111	347.886	Monothiol glutaredoxin involved in the biogenesis of iron-sulfur clusters	grxD	TRUE	TRUE	COG0278@1|root,3XPRG@561|Escherichia,1MZ4V@1224|Proteobacteria,1S640@1236|Gammaproteobacteria,COG0278@2|Bacteria			O
GUT_GENOME002713_02143	231	Can also reduce toxic chromate to insoluble and less toxic Cr(3 ). Catalyzes the transfer of three electrons to Cr(6 ) producing Cr(3 ) and one electron to molecular oxygen without producing the toxic Cr(5 ) species and only producing a minimal amount of reactive oxygen species (ROS). Chromate reduction protects the cell against chromate toxicity, but is likely a secondary activity	yieF	TRUE	TRUE	COG0431@2|Bacteria,3XP8R@561|Escherichia,1RYNR@1236|Gammaproteobacteria,1RAFI@1224|Proteobacteria,COG0431@1|root			C
GUT_GENOME002713_02179	247.214	Protein of unknown function (DUF1391)	ydfA	TRUE	TRUE	331M0@2|Bacteria,2E72D@1|root,1SEZR@1236|Gammaproteobacteria,1NCTS@1224|Proteobacteria	2208			1	1
GUT_GENOME002713_02595	327.349	RNaseP catalyzes the removal of the 5'-leader sequence from pre-tRNA to produce the mature 5'-terminus. It can also cleave other RNA substrates such as 4.5S RNA. The protein component plays an auxiliary but essential role in vivo by binding to the 5'-leader sequence and broadening the substrate specificity of the ribozyme	rnpA	TRUE	TRUE	1MZQE@1224|Proteobacteria,COG0594@2|Bacteria,COG0594@1|root,1S90M@1236|Gammaproteobacteria,3XPNX@561|Escherichia			J
GUT_GENOME002713_02624	1061.49	Catalyzes the interconversion of L-alanine and D- alanine	alr	TRUE	TRUE	1RM8U@1236|Gammaproteobacteria,1MV0Q@1224|Proteobacteria,COG0787@2|Bacteria,COG0787@1|root,3XMIC@561|Escherichia			M
GUT_GENOME002746_00067	1057.7	A site-1 protease (S1P) that cleaves the peptide bond between 'Val-148' and 'Ser-149' in RseA. Part of a regulated intramembrane proteolysis (RIP) cascade. When heat shock or other environmental stresses disrupt protein folding in the periplasm, DegS senses the accumulation of unassembled outer membrane porins (OMP) and then initiates RseA (anti sigma-E factor) degradation by cleaving its peripla…	degS	TRUE	TRUE	1MU63@1224|Proteobacteria,1RN9T@1236|Gammaproteobacteria,COG0265@1|root,3XP1F@561|Escherichia,COG0265@2|Bacteria			O
GUT_GENOME002746_00593	1115.62	3-phenylpropionic acid transporter	hcaT	TRUE	TRUE	COG2814@2|Bacteria,COG0477@1|root,1MVZI@1224|Proteobacteria,1RPBT@1236|Gammaproteobacteria,3XMD3@561|Escherichia			E,G,P,R
GUT_GENOME002746_00888	653.676	Catalyzes the retro-aldol cleavage of 4-hydroxy-2- oxopentanoate to pyruvate and acetaldehyde. Is involved in the meta-cleavage pathway for the degradation of	mhpE	TRUE	TRUE	1MVQG@1224|Proteobacteria,1RPPW@1236|Gammaproteobacteria,COG0119@1|root,COG0119@2|Bacteria,3XQEH@561|Escherichia	2652		E	1	1
GUT_GENOME002746_00931	686.307	Part of the sfmACDHF fimbrial operon. Could contribute to adhesion to various surfaces in specific environmental niches. Increases adhesion to eukaryotic T24 bladder epithelial cells in the absence of fim genes	sfmC	TRUE	TRUE	3XQNQ@561|Escherichia,1R3T9@1224|Proteobacteria,1RS56@1236|Gammaproteobacteria,COG3121@2|Bacteria,COG3121@1|root	2693		N,U,W	0.901099	0.901099
GUT_GENOME002746_01021	1592.27	Hydrolyzes trehalose to glucose. Could be involved, in cells returning to low osmolarity conditions, in the utilization of the accumulated cytoplasmic trehalose, which was synthesized in response to high osmolarity	treF	TRUE	TRUE	1RMFP@1236|Gammaproteobacteria,COG1626@2|Bacteria,COG1626@1|root,3XMAI@561|Escherichia,1MWSM@1224|Proteobacteria			G
GUT_GENOME002746_01107	538.197	ATP binding	ybeZ	TRUE	TRUE	1MVDV@1224|Proteobacteria,1RP2Y@1236|Gammaproteobacteria,3XM7G@561|Escherichia,COG1702@1|root,COG1702@2|Bacteria			T
GUT_GENOME002746_01261	495	acyl-CoA thioesterase II	tesB	TRUE	FALSE	1MV9R@1224|Proteobacteria,1RPFI@1236|Gammaproteobacteria,3XMKC@561|Escherichia,COG1946@1|root,COG1946@2|Bacteria			I
GUT_GENOME002746_01290	353.266	an anaerobic reaction coupled to energy-yielding reactions. Can also reduce other N- and S-oxide compounds such as 4-methylmorpholine-N-oxide and biotin sulfoxide (BSO), but with a lower catalytic efficiency	torZ	TRUE	TRUE	COG0243@2|Bacteria,COG0243@1|root,3XNTP@561|Escherichia,1RMVE@1236|Gammaproteobacteria,1NR6J@1224|Proteobacteria	149		C	1	1
GUT_GENOME002757_01460	275.347			FALSE	TRUE
GUT_GENOME002757_01461	252			FALSE	TRUE
GUT_GENOME002757_01466	1201.03	Phage portal protein		FALSE	TRUE	4QUZ7@35237|dsDNA viruses no RNA stage,4QPU3@28883|Caudovirales,4QAYV@10239|Viruses
GUT_GENOME002757_01486	1435.34			FALSE	TRUE	2DGTE@1|root,2ZX89@2|Bacteria
GUT_GENOME002757_03863	1848.39	Superfamily II helicase and inactivated derivatives		FALSE	TRUE	1RQ7H@1236|Gammaproteobacteria,1MW5H@1224|Proteobacteria,COG5519@1|root,COG5519@2|Bacteria			L,R
GUT_GENOME002757_03875	629.442	Catalyzes the decarboxylation of 3-keto-L-gulonate-6-P into L-xylulose-5-P. Is involved in the anaerobic L-ascorbate utilization		FALSE	TRUE	1QWE4@1224|Proteobacteria,1RPV5@1236|Gammaproteobacteria,COG0269@1|root,COG0269@2|Bacteria			G
GUT_GENOME002757_03882	1080.92	IMP dehydrogenase activity		FALSE	TRUE	COG0517@1|root,COG0517@2|Bacteria			T
GUT_GENOME002778_01295	563.787			FALSE	TRUE	1N80Q@1224|Proteobacteria,1SCV2@1236|Gammaproteobacteria,2BW0K@1|root,2Z9YA@2|Bacteria
GUT_GENOME002778_01963	545.226	Converts glutamate to gamma-aminobutyrate (GABA), consuming one intracellular proton in the reaction. The gad system helps to maintain a near-neutral intracellular pH when cells are exposed to extremely acidic conditions. The ability to survive transit through the acidic conditions of the stomach is essential for successful colonization of the mammalian host by commensal and pathogenic bacteria	gadB	TRUE	TRUE	COG0076@2|Bacteria,COG0076@1|root,1MX25@1224|Proteobacteria,3XMMA@561|Escherichia,1RNSQ@1236|Gammaproteobacteria			E
GUT_GENOME002778_02709	322.909	Beta-L-arabinofuranosidase, GH127		FALSE	TRUE	1MWEN@1224|Proteobacteria,1RSMM@1236|Gammaproteobacteria,3XNND@561|Escherichia,COG3533@1|root,COG3533@2|Bacteria			G
GUT_GENOME002778_02991	363	Involved in O antigen modification. Involved in the translocation of bactoprenol-linked glucose across the cytoplasmic membrane (By similarity)	gtrA	FALSE	TRUE	1N1IP@1224|Proteobacteria,COG2246@1|root,COG2246@2|Bacteria,3XQZB@561|Escherichia,1S9M8@1236|Gammaproteobacteria	1174		I,U	0	0.111111
GUT_GENOME002778_03427	687.261	HlyD membrane-fusion protein of T1SS		TRUE	TRUE	1MUI8@1224|Proteobacteria,COG0845@2|Bacteria,1RNK4@1236|Gammaproteobacteria,COG0845@1|root,3XNH1@561|Escherichia			M,V
GUT_GENOME002778_03626	386	Catalyzes the base-exchange of a guanine (G) residue with the queuine precursor 7-aminomethyl-7-deazaguanine (PreQ1) at position 34 (anticodon wobble position) in tRNAs with GU(N) anticodons (tRNA-Asp, -Asn, -His and -Tyr). Catalysis occurs through a double-displacement mechanism. The nucleophile active site attacks the C1' of nucleotide 34 to detach the guanine base from the RNA, forming a coval…	tgt	TRUE	TRUE	3X12V@547|Enterobacter,1RMY3@1236|Gammaproteobacteria,1MUCA@1224|Proteobacteria,COG0343@2|Bacteria,COG0343@1|root	1816		F,J	1	1
GUT_GENOME002807_00484	759.446	Transcriptional	uxuR	TRUE	TRUE	1MY1K@1224|Proteobacteria,1RMUE@1236|Gammaproteobacteria,COG2186@1|root,COG2186@2|Bacteria,3XMVC@561|Escherichia			K
GUT_GENOME002807_00570	899.024	Transcriptional regulator	yjjM	FALSE	TRUE	COG1802@1|root,3XQ5A@561|Escherichia,COG1802@2|Bacteria,1R56F@1224|Proteobacteria,1RNQY@1236|Gammaproteobacteria			K
GUT_GENOME002807_00878	1034.98	Required for the activity of the bacterial periplasmic transport system of putrescine	potD	TRUE	TRUE	1MUYW@1224|Proteobacteria,COG0687@1|root,1RM7W@1236|Gammaproteobacteria,COG0687@2|Bacteria,3XP1M@561|Escherichia			E,P
GUT_GENOME002807_01119	234	aminotransferase	argD	TRUE	TRUE	1RMV1@1236|Gammaproteobacteria,COG4992@1|root,COG4992@2|Bacteria,1MV3C@1224|Proteobacteria			E
GUT_GENOME002807_02435	633.689	Belongs to the UPF0301 (AlgH) family	yqgE	TRUE	TRUE	1RCXM@1224|Proteobacteria,1S3YV@1236|Gammaproteobacteria,COG1678@2|Bacteria,COG1678@1|root,3XNIK@561|Escherichia			K
GUT_GENOME002807_02621	575.99	Converts holo-ACP to apo-ACP by hydrolytic cleavage of the phosphopantetheine prosthetic group from ACP	acpH	TRUE	TRUE	COG3124@2|Bacteria,COG3124@1|root,1MZ59@1224|Proteobacteria,1S9IZ@1236|Gammaproteobacteria,3XNP7@561|Escherichia			I
GUT_GENOME002807_03464	429.783	Flagellar basal body rod FlgEFG protein C-terminal	flgC	TRUE	TRUE	1RHI3@1224|Proteobacteria,1S653@1236|Gammaproteobacteria,3XQYA@561|Escherichia,COG1558@1|root,COG1558@2|Bacteria	2397		N	0.970588	1
GUT_GENOME002807_03677	1097.19	Binds and transfers iron-sulfur (Fe-S) clusters to target apoproteins. Can hydrolyze ATP	mrp	TRUE	TRUE	3XM4T@561|Escherichia,COG0489@1|root,COG0489@2|Bacteria,1RMJF@1236|Gammaproteobacteria,1MU7R@1224|Proteobacteria			D
GUT_GENOME002827_02871	2352.21	tail fiber protein	stfR	FALSE	TRUE	COG5301@1|root,3XQHT@561|Escherichia,1S5SP@1236|Gammaproteobacteria,COG5301@2|Bacteria,1RFCQ@1224|Proteobacteria	553		M,X	0	1
GUT_GENOME002848_02092	321.026	Belongs to the frataxin family	cyaY	TRUE	TRUE	COG1965@2|Bacteria,1S5UP@1236|Gammaproteobacteria,COG1965@1|root,1RH9A@1224|Proteobacteria,3XPP1@561|Escherichia			P
GUT_GENOME002936_00727	1720.5	sulfuric ester hydrolase activity	yejM	TRUE	TRUE	1MX6X@1224|Proteobacteria,1RPAU@1236|Gammaproteobacteria,COG3083@1|root,COG3083@2|Bacteria,3XP9R@561|Escherichia			M,T
GUT_GENOME002936_02509	924.065	Catalyzes the interconversion between ADP-D-glycero- beta-D-manno-heptose and ADP-L-glycero-beta-D-manno-heptose via an epimerization at carbon 6 of the heptose	hldD	TRUE	TRUE	1RP2S@1236|Gammaproteobacteria,COG0451@2|Bacteria,1MVE4@1224|Proteobacteria,COG0451@1|root,3XNDJ@561|Escherichia			F,M
GUT_GENOME002959_00123	1310.73	COG0732 Restriction endonuclease S subunits	hsdS	FALSE	TRUE	COG0732@2|Bacteria,COG0732@1|root,1MXVH@1224|Proteobacteria,1S29W@1236|Gammaproteobacteria			V
GUT_GENOME002959_00125	1345.17	also binds to GTP. Isoform 33 kDa is less active than isoform 51 kDa and may play a role in regulating the activity of isoform 51 kDa by competing with it in DNA and protein binding abilities	mcrB	FALSE	TRUE	3XR9B@561|Escherichia,COG1401@1|root,1RSU7@1236|Gammaproteobacteria,COG1401@2|Bacteria,1MYQM@1224|Proteobacteria	2152		L,V	0	0.75
GUT_GENOME002959_00621	237	Bacterial inner membrane protein	ygjV	TRUE	TRUE	28NVI@1|root,2ZBTK@2|Bacteria,3XRMQ@561|Escherichia,1T13I@1236|Gammaproteobacteria,1RJV0@1224|Proteobacteria
GUT_GENOME002959_01299	1421.58	Part of the ABC transporter complex RbsABC involved in ribose import. Responsible for energy coupling to the transport system	rbsA	TRUE	TRUE	COG1129@1|root,1RMCH@1236|Gammaproteobacteria,1MU22@1224|Proteobacteria,COG1129@2|Bacteria,3XN9K@561|Escherichia			G,P
GUT_GENOME002959_01684	299.625	Helix-turn-helix domain	VY92_07345	FALSE	TRUE	COG3620@2|Bacteria,1N4KQ@1224|Proteobacteria,1S8WX@1236|Gammaproteobacteria,COG3620@1|root,3XRAP@561|Escherichia			K
GUT_GENOME002959_01685	345	Phage derived protein Gp49-like (DUF891)	VY92_07350	FALSE	TRUE	1S686@1236|Gammaproteobacteria,1MZIY@1224|Proteobacteria,3XRE0@561|Escherichia,COG4683@1|root,COG4683@2|Bacteria
GUT_GENOME002959_02038	274.846			FALSE	TRUE	1N80Q@1224|Proteobacteria,2Z9YA@2|Bacteria,1SCV2@1236|Gammaproteobacteria,2BW0K@1|root
GUT_GENOME002959_02039	330			FALSE	TRUE	1PIUB@1224|Proteobacteria,1KEDB@119060|Burkholderiaceae,32PD8@2|Bacteria,2W7DK@28216|Betaproteobacteria,2BU4B@1|root
GUT_GENOME002959_02225	591.265	tetR family	yjgJ	TRUE	TRUE	COG1309@2|Bacteria,1S20B@1236|Gammaproteobacteria,1RC4X@1224|Proteobacteria,COG1309@1|root	2673		K	1	1
GUT_GENOME002959_03161	494.085			FALSE	TRUE		1396			0	0.2
GUT_GENOME002959_03164	1300.94	T5orf172		FALSE	TRUE	1PEPJ@1224|Proteobacteria,1RQFX@1236|Gammaproteobacteria,1XW1A@135623|Vibrionales,COG1196@1|root,COG1196@2|Bacteria			D
GUT_GENOME002959_03207	546.5	TIGRFAM Outer membrane protein		FALSE	TRUE	COG2373@2|Bacteria,COG2373@1|root,1SM3U@1236|Gammaproteobacteria,1QV7E@1224|Proteobacteria			N,R,U
GUT_GENOME002959_03395	252	permease	uraA	TRUE	TRUE	1MUN9@1224|Proteobacteria,1RRK5@1236|Gammaproteobacteria,COG2233@2|Bacteria,COG2233@1|root,3XMK3@561|Escherichia			F
GUT_GENOME002959_03404	965.834			FALSE	TRUE	4QHQ1@10239|Viruses,4QNPF@10744|Podoviridae,4QUDS@28883|Caudovirales,4QXZ1@35237|dsDNA viruses no RNA stage
GUT_GENOME002959_03740	706.398	peroxidase activity	yfeX	TRUE	TRUE	1RMZJ@1236|Gammaproteobacteria,COG2837@1|root,COG2837@2|Bacteria,1MWDD@1224|Proteobacteria,3XM48@561|Escherichia	1675		P	1	1
GUT_GENOME002959_03778	1081.66	Catalyzes the 2-thiolation of uridine at the wobble position (U34) of tRNA(Lys), tRNA(Glu) and tRNA(Gln), leading to the formation of s(2)U34, the first step of tRNA-mnm(5)s(2)U34 synthesis. Sulfur is provided by IscS, via a sulfur-relay system. Binds ATP and its substrate tRNAs	mnmA	TRUE	TRUE	1MUT1@1224|Proteobacteria,1RMAK@1236|Gammaproteobacteria,COG0482@1|root,COG0482@2|Bacteria,3XN22@561|Escherichia			J
GUT_GENOME002959_03822	381	Required for the expression of anaerobic nitric oxide (NO) reductase, acts as a transcriptional activator for at least the norVW operon. Activation also requires sigma-54	norR	FALSE	TRUE	1QTT3@1224|Proteobacteria,COG3604@2|Bacteria,COG3604@1|root,3XMM3@561|Escherichia,1T1G7@1236|Gammaproteobacteria	1052		K,T	0	1
GUT_GENOME003011_00859	3075.11	Mediates aggregation, biofilm formation and adhesion to a range of extracellular matrix (ECM) proteins, such as fibronectin, fibrinogen, laminin and collagen types I, II, III, and V. Mediates adhesion to	xadA	TRUE	FALSE	1N338@1224|Proteobacteria,1RPXV@1236|Gammaproteobacteria,3XNG0@561|Escherichia,COG5295@1|root,COG5295@2|Bacteria			U,W
GUT_GENOME003011_01080	1247.36	Functions in two distinct reactions of the de novo folate biosynthetic pathway. Catalyzes the addition of a glutamate residue to dihydropteroate (7,8-dihydropteroate or H2Pte) to form dihydrofolate (7,8-dihydrofolate monoglutamate or H2Pte-Glu). Also catalyzes successive additions of L-glutamate to tetrahydrofolate or 10-formyltetrahydrofolate or 5,10-methylenetetrahydrofolate, leading to folylpo…	folC	TRUE	TRUE	1MVCH@1224|Proteobacteria,1RMB0@1236|Gammaproteobacteria,3XPHJ@561|Escherichia,COG0285@1|root,COG0285@2|Bacteria			H
GUT_GENOME003019_01748	211.145	Transposase	yadD	TRUE	TRUE	COG5464@1|root,COG5464@2|Bacteria	1314		L	1	1
GUT_GENOME003053_00002	264			TRUE	FALSE		1573			0.8	0
GUT_GENOME003053_00018	608.268	FR47-like protein		TRUE	FALSE	1VDD6@1239|Firmicutes,24NEN@186801|Clostridia,26CR6@186813|unclassified Clostridiales,COG0454@1|root,COG0456@2|Bacteria			J,K,R
GUT_GENOME003053_00056	222	Protein of unknown function (DUF1382)		TRUE	FALSE	4QDUJ@10239|Viruses,4QVKT@35237|dsDNA viruses no RNA stage,4QNQY@10744|Podoviridae,4QRKJ@28883|Caudovirales
GUT_GENOME003053_00101	929.25			TRUE	FALSE	4QINS@10662|Myoviridae	1575			0.911111	0.0222222
GUT_GENOME003053_00103	600.42			TRUE	FALSE		1573			0.8	0
GUT_GENOME003053_00159	477	Regulates arginine biosynthesis genes	ARGR	FALSE	TRUE	1QC5E@1224|Proteobacteria,1S1KR@1236|Gammaproteobacteria,3X05B@547|Enterobacter,COG1438@1|root,COG1438@2|Bacteria			K
GUT_GENOME003053_00160	1381.04	C4-dicarboxylate anaerobic carrier		FALSE	TRUE	3X23R@547|Enterobacter,1MY1J@1224|Proteobacteria,1RS2M@1236|Gammaproteobacteria,COG1288@1|root,COG1288@2|Bacteria			R
GUT_GENOME003053_00161	987.578	Reversibly catalyzes the transfer of the carbamoyl group from carbamoyl phosphate (CP) to the N(epsilon) atom of ornithine (ORN) to produce L-citrulline	argF	FALSE	TRUE	1MUFM@1224|Proteobacteria,COG0078@1|root,COG0078@2|Bacteria,1RQ59@1236|Gammaproteobacteria,3X1JN@547|Enterobacter			E
GUT_GENOME003053_00162	905.732	Belongs to the carbamate kinase family	arcC	FALSE	TRUE	3X0E7@547|Enterobacter,1RP78@1236|Gammaproteobacteria,1MWXC@1224|Proteobacteria,COG0549@1|root,COG0549@2|Bacteria			E
GUT_GENOME003053_00163	1203.45	Amidinotransferase	arcA	FALSE	TRUE	3X0DP@547|Enterobacter,1NCGV@1224|Proteobacteria,1RM99@1236|Gammaproteobacteria,COG2235@1|root,COG2235@2|Bacteria			E
GUT_GENOME003053_00778	1143.9	response to antibiotic	yeaN	TRUE	TRUE	COG2807@1|root,1RNWA@1236|Gammaproteobacteria,1MXGT@1224|Proteobacteria,COG2807@2|Bacteria,3XMU7@561|Escherichia			P
GUT_GENOME003053_00970	372	Redox regulated molecular chaperone. Protects both thermally unfolding and oxidatively damaged proteins from irreversible aggregation. Plays an important role in the bacterial defense system toward oxidative stress	hslO	TRUE	TRUE	COG1281@2|Bacteria,COG1281@1|root,3XP30@561|Escherichia,1MUMU@1224|Proteobacteria,1RMP3@1236|Gammaproteobacteria	1706		O	1	1
GUT_GENOME003053_01662	429.161	CRISPR-associated protein Cse2 (CRISPR_cse2)		TRUE	TRUE	1MYJH@1224|Proteobacteria,1S7A8@1236|Gammaproteobacteria,318W0@2|Bacteria,2DM10@1|root,3XQ9V@561|Escherichia	2540			1	1
GUT_GENOME003053_02279	336			TRUE	TRUE		1460			1	1
GUT_GENOME003053_02809	1062.23	outer membrane autotransporter barrel domain protein		FALSE	TRUE	COG3468@2|Bacteria,COG3468@1|root	1133		M,U	0	1
GUT_GENOME003053_03238	1580.04	Protein of unknown function (DUF2773)		TRUE	FALSE	2EWBD@1|root,1NXN5@1224|Proteobacteria,341YA@2|Bacteria,1SQ2Q@1236|Gammaproteobacteria	1135			1	0
GUT_GENOME003053_03251	722.543	COG1120 ABC-type cobalamin Fe3 -siderophores transport systems, ATPase components		TRUE	TRUE	1MUNG@1224|Proteobacteria,1S4UC@1236|Gammaproteobacteria,COG1120@1|root,COG1120@2|Bacteria	1020		H,P	1	1
GUT_GENOME003053_03585	521.625	Part of the tripartite efflux system EmrAB-TolC, which confers resistance to antibiotics	emrB	FALSE	TRUE	3XPHW@561|Escherichia,1MU1I@1224|Proteobacteria,1RNTG@1236|Gammaproteobacteria,COG2814@2|Bacteria,COG0477@1|root			E,G,P,R,U
GUT_GENOME003053_04255	909.08	Upon expression enhances RecA-independent DNA recombination 2.9-fold, concomitantly reducing viability by 59 and inducing DNA damage as measured by induction of the SOS repair response	yadD	TRUE	TRUE	COG5464@1|root,COG5464@2|Bacteria,1RNUW@1236|Gammaproteobacteria,1MUSP@1224|Proteobacteria,3XQBX@561|Escherichia			L
GUT_GENOME003053_04400	920.844	formate transmembrane transporter activity	yfdC	TRUE	TRUE	COG2116@1|root,COG2116@2|Bacteria,1N8YM@1224|Proteobacteria,1RPJ0@1236|Gammaproteobacteria,3XN9Y@561|Escherichia			P
GUT_GENOME003053_04517	628.615	Catalyzes the thiamine diphosphate-dependent decarboxylation of 2-oxoglutarate and the subsequent addition of the resulting succinic semialdehyde-thiamine pyrophosphate anion to isochorismate to yield 2-succinyl-5-enolpyruvyl-6-hydroxy-3- cyclohexene-1-carboxylate (SEPHCHC)	menD	TRUE	TRUE	1MVMZ@1224|Proteobacteria,COG1165@2|Bacteria,COG1165@1|root,3XMUB@561|Escherichia,1RNRS@1236|Gammaproteobacteria			H
GUT_GENOME003053_04547	237	Ethanolamine utilization protein eutG	eutG	TRUE	TRUE	1MVPH@1224|Proteobacteria,1RMVU@1236|Gammaproteobacteria,COG1454@1|root,3XPC0@561|Escherichia,COG1454@2|Bacteria	2273		C	1	1
GUT_GENOME003113_00161	1113.92	Aminotransferase class-V	JD73_00825	FALSE	TRUE	COG0156@1|root,1RNS6@1236|Gammaproteobacteria,1MVVH@1224|Proteobacteria,COG0156@2|Bacteria,3XMFT@561|Escherichia	129		E,H	0.615385	1
GUT_GENOME003113_00939	1883.26	oxidoreductase activity, acting on the aldehyde or oxo group of donors, iron-sulfur protein as acceptor	ydhV	TRUE	TRUE	COG2414@1|root,3XQTC@561|Escherichia,1RSCT@1236|Gammaproteobacteria,1MWBB@1224|Proteobacteria,COG2414@2|Bacteria			C
GUT_GENOME003113_02150	286.286	Tagatose 6 phosphate kinase		TRUE	TRUE	2EC94@1|root,2SI5X@2759|Eukaryota,3BYHV@33208|Metazoa,3AG61@33154|Opisthokonta,3DF4V@33213|Bilateria
GUT_GENOME003113_02753	1252.33	Catalyzes the transfer of the enolpyruvyl moiety of phosphoenolpyruvate (PEP) to the 5-hydroxyl of shikimate-3- phosphate (S3P) to produce enolpyruvyl shikimate-3-phosphate and inorganic phosphate	aroA	TRUE	TRUE	COG0128@1|root,1MWMK@1224|Proteobacteria,1RQ8U@1236|Gammaproteobacteria,3XMZC@561|Escherichia,COG0128@2|Bacteria			E
GUT_GENOME003113_03394	456	Produces ATP from ADP in the presence of a proton gradient across the membrane. The gamma chain is believed to be important in regulating ATPase activity and the flow of protons through the CF(0) complex	atpG	TRUE	TRUE	COG0224@1|root,1RNWJ@1236|Gammaproteobacteria,1MU28@1224|Proteobacteria,COG0224@2|Bacteria,3WZUY@547|Enterobacter			C
GUT_GENOME003122_01653	1124.99	Catalyzes the isomerization-deamination of galactosamine 6-phosphate to form tagatofuranose 6-phosphate and ammonium ion	agaS	TRUE	TRUE	1RRU0@1236|Gammaproteobacteria,3XPES@561|Escherichia,COG2222@1|root,COG2222@2|Bacteria,1NICK@1224|Proteobacteria			G,M
GUT_GENOME003122_01893	358.268	Bacterial regulatory proteins, tetR family	eefR	TRUE	FALSE	1SYQC@1236|Gammaproteobacteria,3XMVS@561|Escherichia,COG1309@1|root,1R85H@1224|Proteobacteria,COG1309@2|Bacteria	1019		K	1	0.8
GUT_GENOME003122_02606	1221.3	metalloexopeptidase activity	pepP	TRUE	TRUE	3XN21@561|Escherichia,1RN0W@1236|Gammaproteobacteria,COG0006@1|root,COG0006@2|Bacteria,1MUZS@1224|Proteobacteria			E
GUT_GENOME003122_02709	1096.28	The 2-oxoglutarate dehydrogenase complex catalyzes the overall conversion of 2-oxoglutarate to succinyl-CoA and CO(2). It contains multiple copies of three enzymatic components 2- oxoglutarate dehydrogenase (E1), dihydrolipoamide succinyltransferase (E2) and lipoamide dehydrogenase (E3)	sucA	TRUE	FALSE	COG0567@2|Bacteria,1RN8K@1236|Gammaproteobacteria,1MVBF@1224|Proteobacteria,COG0567@1|root,3XMF3@561|Escherichia	1528		C,F	1	0
GUT_GENOME003122_04297	910.333	Belongs to the class-II aminoacyl-tRNA synthetase family	lysS	TRUE	FALSE	COG1190@2|Bacteria,1MX1V@1224|Proteobacteria,1RMJN@1236|Gammaproteobacteria,COG1190@1|root,3XM7X@561|Escherichia	2179		J	1	0
GUT_GENOME003175_02348	361.773	regulation of nucleic acid-templated transcription	yhfY	TRUE	TRUE	2C4HW@1|root,1S8TE@1236|Gammaproteobacteria,32T80@2|Bacteria,3XPTF@561|Escherichia,1N0D7@1224|Proteobacteria
GUT_GENOME003213_00697	731.501	the fumarate reductase is used in anaerobic growth, and the succinate dehydrogenase is used in aerobic growth	frdB	TRUE	TRUE	1MVHS@1224|Proteobacteria,COG0479@2|Bacteria,COG0479@1|root,1RNWR@1236|Gammaproteobacteria,3XMXG@561|Escherichia			C
GUT_GENOME003213_01036	1019.82	Part of the ABC transporter complex MetNIQ involved in methionine import. Responsible for energy coupling to the transport system	metN	TRUE	TRUE	COG1135@2|Bacteria,COG1135@1|root,1RMQD@1236|Gammaproteobacteria,1QTTK@1224|Proteobacteria,3XN54@561|Escherichia			E,P
GUT_GENOME003213_02281	743.639	Transcriptional regulator	yegW	TRUE	TRUE	COG2188@1|root,COG2188@2|Bacteria,1P6ZJ@1224|Proteobacteria,1RPDA@1236|Gammaproteobacteria,3XN07@561|Escherichia			K
GUT_GENOME003213_02810	472.053	Protein of unknown function (DUF2859)		FALSE	TRUE	COG3279@2|Bacteria,COG3279@1|root,1S5VM@1236|Gammaproteobacteria,1RISK@1224|Proteobacteria	967		K,T	0.105263	0.105263
GUT_GENOME003213_03540	631.056	Necessary for normal cell division and for the maintenance of normal septation	engB	TRUE	TRUE	1MY3Z@1224|Proteobacteria,1RNJP@1236|Gammaproteobacteria,COG0218@2|Bacteria,COG0218@1|root,3XN28@561|Escherichia			D
GUT_GENOME003213_03822	885.392	probably responsible for the translocation of the substrate across the membrane	malG	TRUE	TRUE	1RQ00@1236|Gammaproteobacteria,1QA3Z@1224|Proteobacteria,COG3833@2|Bacteria,COG3833@1|root,3XNEJ@561|Escherichia			G,P
GUT_GENOME003246_02820	615.333	Phage Mu protein F like protein		TRUE	TRUE	3ZNA6@590|Salmonella,1RPEA@1236|Gammaproteobacteria,1R40R@1224|Proteobacteria,COG2369@2|Bacteria,COG2369@1|root	493		X	0.916667	0.916667
GUT_GENOME003246_04350	1782.16	membrane protein of prophage CP-933X Escherichia coli O157 H7 EDL933		TRUE	FALSE	COG3064@1|root,COG3064@2|Bacteria,1SJA4@1236|Gammaproteobacteria,1QWXK@1224|Proteobacteria	1465		M	0.25	0.25
GUT_GENOME003275_00809	1085.7	Catalyzes the transfer of the GlcNAc-1-phosphate moiety from UDP-GlcNAc onto the carrier lipid undecaprenyl phosphate (C55-P), yielding GlcNAc-pyrophosphoryl-undecaprenyl (GlcNAc-PP- C55)	wecA	TRUE	TRUE	COG0472@2|Bacteria,COG0472@1|root,1RNAP@1236|Gammaproteobacteria,1MWYW@1224|Proteobacteria,3XM50@561|Escherichia			M
GUT_GENOME003275_01319	817.133	Catalyzes both the ATP-dependent activation of exogenously supplied lipoate to lipoyl-AMP and the transfer of the activated lipoyl onto the lipoyl domains of lipoate-dependent enzymes	lplA	TRUE	TRUE	1RMGI@1236|Gammaproteobacteria,1N1T8@1224|Proteobacteria,COG0095@2|Bacteria,COG0095@1|root,3XMVY@561|Escherichia,COG3726@2|Bacteria,COG3726@1|root			H,J
GUT_GENOME003275_01998	352.672	nucleic acid binding		FALSE	TRUE	4QAKE@10239|Viruses,4QPCE@28883|Caudovirales,4QUP7@35237|dsDNA viruses no RNA stage,4QI56@10662|Myoviridae	2314			0	1
GUT_GENOME003275_02136	1498.57	Integrase		TRUE	FALSE	1R4US@1224|Proteobacteria,COG0582@2|Bacteria,1RPWW@1236|Gammaproteobacteria,COG0582@1|root,46BZA@72275|Alteromonadaceae	1750		L,X	0.4	0
GUT_GENOME003276_03422	1233.03	cyclic-guanylate-specific phosphodiesterase activity	ycgG	TRUE	TRUE	1N299@1224|Proteobacteria,1RNP4@1236|Gammaproteobacteria,COG2200@1|root,COG2200@2|Bacteria,3XQT7@561|Escherichia			T
GUT_GENOME003276_03424	1279.98	outer membrane autotransporter barrel domain protein		TRUE	FALSE	COG3468@1|root,COG3468@2|Bacteria,1RPXJ@1236|Gammaproteobacteria,1R8WV@1224|Proteobacteria	2651		M,U	1	0
GUT_GENOME003276_04122	710.905	Methyltransferase small domain		FALSE	TRUE	COG2519@1|root,1RSIH@1236|Gammaproteobacteria,1MXAK@1224|Proteobacteria,COG2519@2|Bacteria	418		J	0	1
GUT_GENOME003358_00274	1109.4	Catalyzes the phosphorylation of L-xylulose and 3-keto- L-gulonate. Is involved in L-lyxose utilization via xylulose, and may also be involved in the utilization of 2,3-diketo-L-gulonate	lyx	TRUE	TRUE	1MWS5@1224|Proteobacteria,COG1070@1|root,1RP2G@1236|Gammaproteobacteria,COG1070@2|Bacteria,3XP88@561|Escherichia			G
GUT_GENOME003358_01066	948.494	Belongs to the mandelate racemase muconate lactonizing enzyme family	ycjG	TRUE	TRUE	1MW76@1224|Proteobacteria,COG4948@2|Bacteria,1RMKS@1236|Gammaproteobacteria,3XNFU@561|Escherichia,COG4948@1|root			M,R
GUT_GENOME003358_01129	892.577	regulatory protein	nhaR	TRUE	TRUE	COG0583@1|root,3XPFK@561|Escherichia,COG0583@2|Bacteria,1RN7G@1236|Gammaproteobacteria,1MVHT@1224|Proteobacteria			K
GUT_GENOME003358_02139	474	gluconate transporter	yjhF	FALSE	TRUE	1MUFG@1224|Proteobacteria,1RNGE@1236|Gammaproteobacteria,3XNJE@561|Escherichia,COG2610@1|root,COG2610@2|Bacteria	418		G,P	0	1
GUT_GENOME003358_02358	1217.51	Rossmann fold nucleotide-binding protein involved in DNA uptake		TRUE	FALSE	1RYGJ@1236|Gammaproteobacteria,COG0758@1|root,COG0758@2|Bacteria,1Q7YP@1224|Proteobacteria	1308		L,U	1	0
GUT_GENOME003358_02628	234.125	FimB is one of the 2 regulatory proteins which control the phase variation of type 1 fimbriae in E.coli. These proteins mediate the periodic inversion of a 300bp DNA segment that harbors the promoter for the fimbrial structural gene, fimA. FimB switches fimA on	fimB	TRUE	FALSE	COG0582@1|root,3XPS4@561|Escherichia,1QUDQ@1224|Proteobacteria,COG0582@2|Bacteria,1T1V1@1236|Gammaproteobacteria	621		K,L,X	1	0
GUT_GENOME003358_02788	654.96	Transcription regulator that activates transcription by stimulating RNA polymerase (RNAP) recycling in case of stress conditions such as supercoiled DNA or high salt concentrations. Probably acts by releasing the RNAP, when it is trapped or immobilized on tightly supercoiled DNA. Does not activate transcription on linear DNA. Probably not involved in DNA repair	rapA	TRUE	FALSE	1MX6H@1224|Proteobacteria,3XNHH@561|Escherichia,1RNRZ@1236|Gammaproteobacteria,COG0553@1|root,COG0553@2|Bacteria	2071		K,L	1	0
GUT_GENOME003358_02948	645.142	Nitrate nitrite response regulator	narP	TRUE	TRUE	1Q7GF@1224|Proteobacteria,COG2197@2|Bacteria,1RWWU@1236|Gammaproteobacteria,COG2197@1|root,3XM7A@561|Escherichia			K,T
GUT_GENOME003358_02991	228.803		yciY	TRUE	TRUE	3XQ47@561|Escherichia,334IP@2|Bacteria,2EAF9@1|root,1SCYM@1236|Gammaproteobacteria,1N7PT@1224|Proteobacteria
GUT_GENOME003387_00559	383.76	ribosomal protein L17	rplQ	TRUE	TRUE	1S3QK@1236|Gammaproteobacteria,COG0203@1|root,COG0203@2|Bacteria,1RCWN@1224|Proteobacteria,3XPKJ@561|Escherichia			J
GUT_GENOME003387_00567	1129.92	COG3524 Capsule polysaccharide export protein	kpsE	TRUE	FALSE	COG3524@2|Bacteria,1R3ZY@1224|Proteobacteria,COG3524@1|root,3XMKW@561|Escherichia,1RPZH@1236|Gammaproteobacteria	1039		M	1	0.142857
GUT_GENOME003387_00595	686.693	Sequence-specific endonuclease that cleaves unmethylated GATC sequences. It is involved in DNA mismatch repair	mutH	TRUE	TRUE	COG3066@1|root,COG3066@2|Bacteria,1MVYX@1224|Proteobacteria,1RQVV@1236|Gammaproteobacteria,3XNN5@561|Escherichia			L
GUT_GENOME003387_00850	784.087	Tellurite resistance protein tehA	tehA	TRUE	TRUE	COG1275@2|Bacteria,1MVPG@1224|Proteobacteria,1RPVM@1236|Gammaproteobacteria,3XNVK@561|Escherichia,COG1275@1|root			P,V
GUT_GENOME003387_00915	420.209	Heat shock protein HslJ	hslJ	TRUE	TRUE	COG3187@1|root,3XPKD@561|Escherichia,1S6MZ@1236|Gammaproteobacteria,1RFSD@1224|Proteobacteria,COG3187@2|Bacteria			O
GUT_GENOME003387_00916	267.009	Domain of unknown function (DUF333)	ydbJ	FALSE	TRUE	3XPUC@561|Escherichia,1S71D@1236|Gammaproteobacteria,COG3042@1|root,COG3042@2|Bacteria,1RIV0@1224|Proteobacteria			R
GUT_GENOME003387_00922	425.22	Nitric oxide-sensitive repressor of genes involved in protecting the cell against nitrosative stress. May require iron for activity	nsrR	TRUE	TRUE	1N05H@1224|Proteobacteria,COG1959@1|root,COG1959@2|Bacteria,1S8SJ@1236|Gammaproteobacteria,3XMZ9@561|Escherichia			K
GUT_GENOME003387_01977	1189.24	transporter activity	ynfM	TRUE	TRUE	COG2814@2|Bacteria,COG0477@1|root,3XNEU@561|Escherichia,1RPAT@1236|Gammaproteobacteria,1MWFH@1224|Proteobacteria			E,G,P,R
GUT_GENOME003387_02940	768.499	DUF218 domain	ydcF	TRUE	TRUE	COG1434@2|Bacteria,3XP6S@561|Escherichia,1RSJ5@1236|Gammaproteobacteria,1N4TG@1224|Proteobacteria,COG1434@1|root			M
GUT_GENOME003387_03107	711.252	O-methyltransferase that catalyzes the 2 O-methylation steps in the ubiquinone biosynthetic pathway	ubiG	TRUE	TRUE	COG2227@2|Bacteria,1RMV7@1236|Gammaproteobacteria,COG2227@1|root,1MU89@1224|Proteobacteria,3XMKY@561|Escherichia			H
GUT_GENOME003387_03718	335.912	Structural component of flagellum, the bacterial motility apparatus. Part of the rod structure of flagellar basal body	flgB	TRUE	TRUE	COG1815@1|root,3XR2J@561|Escherichia,1S9DS@1236|Gammaproteobacteria,1MZ8P@1224|Proteobacteria,COG1815@2|Bacteria	2397		N	0.970588	1
GUT_GENOME003394_02188	252	Transcriptional regulator	yxaF	FALSE	TRUE	1QIJW@1224|Proteobacteria,COG1309@1|root,COG1309@2|Bacteria	498		K	0	0.230769
GUT_GENOME003428_02744	683.809	Phage antitermination protein Q		FALSE	TRUE	1MVG8@1224|Proteobacteria,1RQPN@1236|Gammaproteobacteria,28HCQ@1|root,2Z7PH@2|Bacteria	1465			0.25	0.25
GUT_GENOME003428_03922	739.888	Transcriptional regulator	mobC	FALSE	TRUE	1RYGR@1236|Gammaproteobacteria,COG1846@2|Bacteria,COG1846@1|root,1PAYS@1224|Proteobacteria,2JEKX@204037|Dickeya			K
GUT_GENOME003428_03923	929.854	Domain of unknown function (DUF1738)	traC	FALSE	TRUE	1RNU7@1236|Gammaproteobacteria,COG4227@2|Bacteria,1MU8I@1224|Proteobacteria,COG4227@1|root,41E7B@629|Yersinia			L
GUT_GENOME003428_03926	1059	HNH endonuclease		FALSE	TRUE	1R7CP@1224|Proteobacteria,COG1403@1|root,COG1403@2|Bacteria			V
GUT_GENOME003428_03927	1785	AAA domain, putative AbiEii toxin, Type IV TA system		FALSE	TRUE	1QWVB@1224|Proteobacteria,1T4XT@1236|Gammaproteobacteria,COG3593@1|root,COG3593@2|Bacteria			L
GUT_GENOME003428_03928	1548.57	Type I restriction modification DNA specificity domain		FALSE	TRUE	COG0732@2|Bacteria,COG0732@1|root,42SK0@68525|delta/epsilon subdivisions,2WR3V@28221|Deltaproteobacteria,1R4KU@1224|Proteobacteria			L,V
GUT_GENOME003428_03929	1539.97	N-6 DNA Methylase	hsdM	FALSE	TRUE	1MW3A@1224|Proteobacteria,3T4X9@506|Alcaligenaceae,COG0286@1|root,COG0286@2|Bacteria,2VIP4@28216|Betaproteobacteria			V
GUT_GENOME003428_04061	210	Phage conjugal plasmid C-4 type zinc finger protein, TraR family		FALSE	TRUE	1N4ZW@1224|Proteobacteria,1S91R@1236|Gammaproteobacteria,COG1734@1|root,COG1734@2|Bacteria			K,T
GUT_GENOME003428_04065	909	LysM domain		FALSE	TRUE	COG1388@2|Bacteria,1S09R@1236|Gammaproteobacteria,1QTM0@1224|Proteobacteria,COG1388@1|root,41HFZ@629|Yersinia			M
GUT_GENOME003441_01195	945.34	This enzyme may serve as a scavenger, allowing the cell to utilize biotin sulfoxide as a biotin source. It reduces a spontaneous oxidation product of biotin, D-biotin D-sulfoxide (BSO or BDS), back to biotin. Also exhibits methionine-(S)-sulfoxide (Met-S-SO) reductase activity, acting specifically on the (S) enantiomer in the free, but not the protein-bound form. It thus plays a role in assimilat…	bisC	FALSE	TRUE	COG0243@2|Bacteria,COG0243@1|root,3XNDI@561|Escherichia,1RMVE@1236|Gammaproteobacteria,1NR6J@1224|Proteobacteria	1681		C	0	1
GUT_GENOME003441_01632	283.324	Represses the expression of the murPQ operon involved in the uptake and degradation of N-acetylmuramic acid (MurNAc). Binds to two adjacent inverted repeats within the operator region. MurNAc 6-phosphate, the substrate of MurQ, is the specific inducer that weakens binding of MurR to the operator	murR	TRUE	TRUE	3XMSX@561|Escherichia,1MURZ@1224|Proteobacteria,1RMUM@1236|Gammaproteobacteria,COG1028@2|Bacteria,COG1028@1|root			I,Q
GUT_GENOME003441_01708	225	Response regulator receiver	ompR	TRUE	TRUE	1MY3D@1224|Proteobacteria,1RPKN@1236|Gammaproteobacteria,3X0ZQ@547|Enterobacter,COG0745@1|root,COG0745@2|Bacteria			K,T
GUT_GENOME003441_01906	979.044	A protein kinase that phosphorylates Ser and Thr residues. Probably acts to suppress the effects of stress linked to accumulation of reactive oxygen species. Probably involved in the extracytoplasmic stress response	srkA	TRUE	TRUE	COG2334@1|root,COG2334@2|Bacteria,1RNHI@1236|Gammaproteobacteria,1MU2Q@1224|Proteobacteria,3XNBG@561|Escherichia			F,T
GUT_GENOME003441_01968	556.823	Belongs to the transferase hexapeptide repeat family	dapD	TRUE	TRUE	COG2171@2|Bacteria,1MU0Y@1224|Proteobacteria,1RPCS@1236|Gammaproteobacteria,3XMBZ@561|Escherichia,COG2171@1|root			E
GUT_GENOME003441_02253	513	Fumarylacetoacetate (FAA) hydrolase family	hpaG	FALSE	TRUE	1RPYA@1236|Gammaproteobacteria,1MUPF@1224|Proteobacteria,3XRF3@561|Escherichia,COG0179@1|root,COG0179@2|Bacteria	2619		Q	0	1
GUT_GENOME003441_02254	446.419	Homoprotocatechuate degradative operon repressor	hpaR	FALSE	TRUE	1RCY7@1224|Proteobacteria,COG1846@2|Bacteria,1S49H@1236|Gammaproteobacteria,COG1846@1|root	2618		K	0	1
GUT_GENOME003441_02409	995.141	Aldo Keto reductase	pld1	FALSE	TRUE	COG0667@2|Bacteria,COG0667@1|root,1RQ4H@1236|Gammaproteobacteria,1MWGQ@1224|Proteobacteria	1480		C,H,R	0.5	0.75
GUT_GENOME003441_02673	391.621	Invasion gene expression up-regulator, SirB	sirB2	TRUE	TRUE	1MZN6@1224|Proteobacteria,COG3094@1|root,COG3094@2|Bacteria,1S5WP@1236|Gammaproteobacteria,3XPST@561|Escherichia
GUT_GENOME003441_02780	449.055	Catalyzes the carbon skeleton rearrangement of L- glutamate to L-threo-3-methylaspartate ((2S,3S)-3- methylaspartate)	mamA	TRUE	TRUE	COG2185@2|Bacteria,COG2185@1|root,1S2GQ@1236|Gammaproteobacteria,1RB2M@1224|Proteobacteria,3XPJK@561|Escherichia	1459		E,I	0.958333	1
GUT_GENOME003496_00650	1037.93	glycerol dehydrogenase	gldA	TRUE	FALSE	1RN9F@1236|Gammaproteobacteria,COG0371@1|root,1MWAE@1224|Proteobacteria,COG0371@2|Bacteria			C
GUT_GENOME003496_00904	1003.61	asparagine catabolic process via L-aspartate	ansA	TRUE	TRUE	1MWIR@1224|Proteobacteria,1RMUB@1236|Gammaproteobacteria,COG0252@1|root,COG0252@2|Bacteria,3XP19@561|Escherichia			E,J
GUT_GENOME003496_01336	457.521	Involved in the biosynthesis of osmoregulated periplasmic glucans (OPGs)	mdoH	TRUE	FALSE	1MVXZ@1224|Proteobacteria,COG2943@2|Bacteria,COG2943@1|root,3XM8N@561|Escherichia,1RMGX@1236|Gammaproteobacteria			G,M
GUT_GENOME003496_01591	239.974	Transcriptional regulator		TRUE	FALSE	COG2207@1|root,COG2207@2|Bacteria	1322		K	1	0
GUT_GENOME003496_01912	694.593	Fumarylacetoacetate (FAA) hydrolase family	mhbB	TRUE	TRUE	1MVFA@1224|Proteobacteria,1RN6Y@1236|Gammaproteobacteria,3XQWG@561|Escherichia,COG0179@1|root,COG0179@2|Bacteria			Q
GUT_GENOME003496_02111	1810.59	GGDEF domain containing protein		TRUE	FALSE	1TP8V@1239|Firmicutes,26N8P@186821|Sporolactobacillaceae,COG5001@2|Bacteria,COG5001@1|root,4HA3G@91061|Bacilli			T
GUT_GENOME003496_02271	1446.17			TRUE	FALSE	1R4SC@1224|Proteobacteria,2ZABR@2|Bacteria,1SF73@1236|Gammaproteobacteria,2DBQ2@1|root
GUT_GENOME003496_02379	909.016	Belongs to the D-alanine--D-alanine ligase family	ddl	TRUE	TRUE	1MUTB@1224|Proteobacteria,1RMTM@1236|Gammaproteobacteria,3XMQE@561|Escherichia,COG1181@1|root,COG1181@2|Bacteria			F,M,R
GUT_GENOME003496_03111	829.895	Protein of unknown function (DUF2544)	yfcO	TRUE	FALSE	3064I@2|Bacteria,29J73@1|root,1S4XD@1236|Gammaproteobacteria,3XQZ3@561|Escherichia,1RDMI@1224|Proteobacteria	864			0.142857	0
GUT_GENOME003496_03807	238.825			TRUE	TRUE		737			1	1
GUT_GENOME003496_04145	724.969	This is one of three E.coli hydrogenases synthesized in response to different physiological conditions. HYD1 is believed to have a role in hydrogen cycling during fermentative growth	hyaA	TRUE	FALSE	3XM4G@561|Escherichia,COG1740@1|root,1RNTJ@1236|Gammaproteobacteria,COG1740@2|Bacteria,1MWAC@1224|Proteobacteria			C
GUT_GENOME003496_04177	327.189	Hydrogenase maturation protease	hyaD	TRUE	TRUE	COG0680@2|Bacteria,COG0680@1|root,1RE1C@1224|Proteobacteria,1S1V0@1236|Gammaproteobacteria,3XRHU@561|Escherichia	249		C,O	1	1
GUT_GENOME003506_01439	1303.98	Pfam:DUF1446		TRUE	TRUE	1QDPJ@1224|Proteobacteria,1RT2W@1236|Gammaproteobacteria,3XNP2@561|Escherichia,COG1574@1|root,COG1574@2|Bacteria	1459		R	0.958333	1
GUT_GENOME003506_01445	591.511			TRUE	TRUE	1TGMU@1236|Gammaproteobacteria,1QISG@1224|Proteobacteria,2AV6Q@1|root,3XRBZ@561|Escherichia,31KX5@2|Bacteria
GUT_GENOME003506_02224	546.188	Part of the ABC transporter involved in the uptake of citrate-dependent Fe(3	fecB	TRUE	FALSE	1R3VS@1224|Proteobacteria,1RMCX@1236|Gammaproteobacteria,COG4594@1|root,COG4594@2|Bacteria			P
GUT_GENOME003506_02230	793.102	Major apurinic-apyrimidinic endonuclease of E.coli. It removes the damaged DNA at cytosines and guanines by cleaving on the 3'-side of the AP site by a beta-elimination reaction. It exhibits 3'-5'-exonuclease, 3'-phosphomonoesterase, 3'-repair diesterase and ribonuclease H activities	xthA	TRUE	TRUE	1MVII@1224|Proteobacteria,COG0708@2|Bacteria,COG0708@1|root,1RN4H@1236|Gammaproteobacteria,3XPFE@561|Escherichia			L
GUT_GENOME003506_02819	726.634	Thiolesterase that catalyzes the hydrolysis of S-D- lactoyl-glutathione to form glutathione and D-lactic acid	gloB	TRUE	TRUE	COG0491@1|root,1MU8Q@1224|Proteobacteria,COG0491@2|Bacteria,1S22I@1236|Gammaproteobacteria,3XMRR@561|Escherichia			R
GUT_GENOME003506_03105	394.322			TRUE	TRUE
GUT_GENOME003506_03119	204	Fosmidomycin resistance protein	fsr	TRUE	TRUE	COG2223@1|root,COG2223@2|Bacteria,3XP1S@561|Escherichia,1RMZZ@1236|Gammaproteobacteria,1MXAA@1224|Proteobacteria	147		P	0.666667	1
GUT_GENOME003506_03380	414.367	iron ion transmembrane transporter activity	efeU	TRUE	FALSE	1MXHM@1224|Proteobacteria,1RMWB@1236|Gammaproteobacteria,3XN4Y@561|Escherichia,COG0672@1|root,COG0672@2|Bacteria			P
GUT_GENOME003552_00329	745.7	UPF0597 protein YhaM	yhaM	TRUE	TRUE	COG3681@2|Bacteria,COG3681@1|root,1RP1R@1236|Gammaproteobacteria,3XNM0@561|Escherichia,1MW81@1224|Proteobacteria	1645		E	1	1
GUT_GENOME003552_00340	695.074	Catalyzes the interconversion of 2-phosphoglycerate and 3-phosphoglycerate	gpmI	TRUE	TRUE	1RMJE@1236|Gammaproteobacteria,1MUQ1@1224|Proteobacteria,COG0696@1|root,COG0696@2|Bacteria,3XMVW@561|Escherichia			F,G
GUT_GENOME003552_00921	721.486	YheO-like PAS domain	yheO	TRUE	TRUE	COG2964@2|Bacteria,COG2964@1|root,1RPDQ@1236|Gammaproteobacteria,1MU5K@1224|Proteobacteria,3XMRU@561|Escherichia			K
GUT_GENOME003552_01335	560.39	defense response to bacterium		TRUE	FALSE	4QVA0@35237|dsDNA viruses no RNA stage,4QPIJ@28883|Caudovirales,4QI48@10662|Myoviridae,4QAVB@10239|Viruses	1575			0.911111	0.0222222
GUT_GENOME003552_02158	970.267	phosphopentomutase activity	yhfW	TRUE	TRUE	1RRD0@1236|Gammaproteobacteria,COG1015@2|Bacteria,1R4RD@1224|Proteobacteria,COG1015@1|root,3XN30@561|Escherichia			G
GUT_GENOME003552_03196	935.907	Catalyzes the conversion of 1-hydroxy-2-methyl-2-(E)- butenyl 4-diphosphate (HMBPP) into a mixture of isopentenyl diphosphate (IPP) and dimethylallyl diphosphate (DMAPP). Acts in the terminal step of the DOXP MEP pathway for isoprenoid precursor biosynthesis	ispH	TRUE	TRUE	1RMN8@1236|Gammaproteobacteria,1MU7G@1224|Proteobacteria,COG0761@2|Bacteria,COG0761@1|root,3XM3C@561|Escherichia			I,M
GUT_GENOME003552_03342	1008.8	NDH-1 shuttles electrons from NADH, via FMN and iron- sulfur (Fe-S) centers, to quinones in the respiratory chain. The immediate electron acceptor for the enzyme in this species is believed to be ubiquinone. Couples the redox reaction to proton translocation (for every two electrons transferred, four hydrogen ions are translocated across the cytoplasmic membrane), and thus conserves the redox ene…	nuoG	FALSE	TRUE	COG1034@2|Bacteria,COG1034@1|root,1RMUH@1236|Gammaproteobacteria,1P8MN@1224|Proteobacteria,3XM7D@561|Escherichia	1924		C	0	1
GUT_GENOME003552_03384	598.303	Ammonia monooxygenase	abrB	TRUE	TRUE	1MUFS@1224|Proteobacteria,1RPMJ@1236|Gammaproteobacteria,COG3180@1|root,COG3180@2|Bacteria	2473		R	1	1
GUT_GENOME003552_03528	222	Catalyzes, although with low efficiency, the sulfur transfer reaction from thiosulfate to cyanide	glpE	TRUE	TRUE	3XPQ7@561|Escherichia,1S94C@1236|Gammaproteobacteria,1MZPW@1224|Proteobacteria,COG0607@2|Bacteria,COG0607@1|root			P
GUT_GENOME003560_02412	696.036			TRUE	FALSE	4QKCI@10662|Myoviridae,4QE5H@10239|Viruses,4QVTP@35237|dsDNA viruses no RNA stage,4QUGI@28883|Caudovirales	390			0.25	0
GUT_GENOME003658_00070	1933.62			TRUE	FALSE	4R0DZ@35237|dsDNA viruses no RNA stage,4QQZA@28883|Caudovirales,4QNRJ@10744|Podoviridae,4QF86@10239|Viruses
GUT_GENOME003670_00755	901.742	Periplasmic binding protein	chuT	TRUE	TRUE	1QTSV@1224|Proteobacteria,COG4558@2|Bacteria,1RNCT@1236|Gammaproteobacteria,COG4558@1|root,3XQQ9@561|Escherichia	1022		P	1	0.761905
GUT_GENOME003670_01652	2131.66			TRUE	TRUE		1460			1	1
GUT_GENOME003670_03223	330.182	Major Facilitator Superfamily	opdE	FALSE	TRUE	1MVD0@1224|Proteobacteria,1RMBW@1236|Gammaproteobacteria,3XQJ0@561|Escherichia,COG0477@1|root,COG2814@2|Bacteria	1485		E,G,P,R	0.2	0.866667
GUT_GENOME003699_00052	2892.64	Efflux pump membrane transporter	mexB	TRUE	FALSE	3XNZS@561|Escherichia,1MU48@1224|Proteobacteria,1RMBN@1236|Gammaproteobacteria,COG0841@1|root,COG0841@2|Bacteria	1022		V	1	0.761905
GUT_GENOME003699_00526	2155.15	E-set like domain	cblC	TRUE	FALSE	1PTRC@1224|Proteobacteria,1S047@1236|Gammaproteobacteria,COG3188@2|Bacteria,COG3188@1|root	2506		N,U,W	1	0
GUT_GENOME003699_00803	457.051		fidL	TRUE	TRUE	1S6FX@1236|Gammaproteobacteria,326Q6@2|Bacteria,3XR1D@561|Escherichia,2BD2N@1|root,1RM49@1224|Proteobacteria	2678			0.315789	0.736842
GUT_GENOME003699_01132	451.209	protein acetylation	elaA	TRUE	TRUE	COG2153@2|Bacteria,COG2153@1|root,3XPI5@561|Escherichia,1S9IF@1236|Gammaproteobacteria,1MZHA@1224|Proteobacteria			R
GUT_GENOME003699_01294	789.623	Removes the N-terminal methionine from nascent proteins. The N-terminal methionine is often cleaved when the second residue in the primary sequence is small and uncharged (Met-Ala-, Cys, Gly, Pro, Ser, Thr, or Val). Requires deformylation of the N(alpha)-formylated initiator methionine before it can be hydrolyzed	map	TRUE	TRUE	COG0024@1|root,COG0024@2|Bacteria,1RMHN@1236|Gammaproteobacteria,1MU99@1224|Proteobacteria,3XMB7@561|Escherichia			E,J
GUT_GENOME003699_02956	481.646	Belongs to the GPAT DAPAT family	plsB	TRUE	TRUE	1MWZ6@1224|Proteobacteria,COG2937@1|root,COG2937@2|Bacteria,1RM7K@1236|Gammaproteobacteria,3XNFZ@561|Escherichia	1509		I	1	1
GUT_GENOME003756_01574	462	SUKH-3 immunity protein		FALSE	TRUE	4P6EX@976|Bacteroidetes,2DXCH@1|root,47VX8@768503|Cytophagia,344EC@2|Bacteria
GUT_GENOME003756_01575	201	COG3209 Rhs family protein		FALSE	TRUE	1X7UP@135614|Xanthomonadales,COG3209@1|root,COG3209@2|Bacteria,1SKYM@1236|Gammaproteobacteria,1MVV1@1224|Proteobacteria			M,R
GUT_GENOME003756_04168	1445.38			FALSE	TRUE	1S380@1236|Gammaproteobacteria,28Q4A@1|root,2ZD8A@2|Bacteria,1RAVK@1224|Proteobacteria
GUT_GENOME003756_04171	1243.47	Reverse transcriptase (RNA-dependent DNA polymerase)		FALSE	TRUE	COG3344@1|root,COG3344@2|Bacteria,1RQP7@1236|Gammaproteobacteria,1MVI1@1224|Proteobacteria,1JFGW@118969|Legionellales			L,X
GUT_GENOME003796_00922	291.415			TRUE	FALSE		1726			0.875	0
GUT_GENOME003852_01197	572.077			TRUE	FALSE
GUT_GENOME003852_01209	633	Bacteriophage CI repressor C-terminal domain		TRUE	FALSE	1NDB9@1224|Proteobacteria,COG2932@2|Bacteria,COG2932@1|root,3ZMPB@590|Salmonella,1RNJS@1236|Gammaproteobacteria			K,X
GUT_GENOME003852_02706	663.939	Protein phosphatase 2C		TRUE	TRUE	COG0631@2|Bacteria,COG0631@1|root,1RIEE@1224|Proteobacteria,1S8N0@1236|Gammaproteobacteria			T
GUT_GENOME003852_03476	1260	AAA ATPase domain		TRUE	FALSE	COG3950@2|Bacteria,COG3950@1|root,1SA18@1236|Gammaproteobacteria,1N052@1224|Proteobacteria			R
GUT_GENOME003852_03477	852	Protein of unknown function (DUF4435)		TRUE	FALSE	33U22@2|Bacteria,2DV4X@1|root,1SNR8@1236|Gammaproteobacteria,1NUD4@1224|Proteobacteria
GUT_GENOME003907_00150	1167.04	Catalyzes the reversible transfer of the CoA moiety from gamma-butyrobetainyl-CoA to L-carnitine to generate L-carnitinyl- CoA and gamma-butyrobetaine. Is also able to catalyze the reversible transfer of the CoA moiety from gamma-butyrobetainyl- CoA or L-carnitinyl-CoA to crotonobetaine to generate crotonobetainyl-CoA	caiB	TRUE	TRUE	1MU2K@1224|Proteobacteria,COG1804@1|root,1RNB5@1236|Gammaproteobacteria,COG1804@2|Bacteria,3XP57@561|Escherichia			C,I
GUT_GENOME003907_00802	1548.56	Part of the adaptive DNA-repair response to alkylating agents. Could prevent alkylation damage by protecting DNA and destroying alkylating agents that have yet to reach their DNA target. Binds to double-stranded DNA with a preference for a DNA region that includes its own promoter. Shows weak isovaleryl-CoA dehydrogenase activity in vitro	aidB	TRUE	TRUE	1RN7X@1236|Gammaproteobacteria,COG1960@1|root,COG1960@2|Bacteria,1MU20@1224|Proteobacteria,3XP17@561|Escherichia			I
GUT_GENOME003907_00862	207.011	YebF-like protein	yebF	FALSE	TRUE	1S6EJ@1236|Gammaproteobacteria,1RIMG@1224|Proteobacteria,2DM3Z@1|root,31MN2@2|Bacteria,3XPTU@561|Escherichia	1948			0	1
GUT_GENOME003907_02989	884.789	The glycine cleavage system catalyzes the degradation of glycine. The P protein binds the alpha-amino group of glycine through its pyridoxal phosphate cofactor	gcvP	TRUE	TRUE	COG0403@1|root,1RND3@1236|Gammaproteobacteria,COG1003@2|Bacteria,COG1003@1|root,COG0403@2|Bacteria,1MUDP@1224|Proteobacteria,3XM76@561|Escherichia	718		E	1	1
GUT_GENOME003907_03915	1152.54	Catalyzes the attachment of alanine to tRNA(Ala) in a two-step reaction alanine is first activated by ATP to form Ala- AMP and then transferred to the acceptor end of tRNA(Ala). Also edits incorrectly charged Ser-tRNA(Ala) and Gly-tRNA(Ala) via its editing domain	alaS	TRUE	TRUE	COG0013@1|root,1MU9A@1224|Proteobacteria,1RMWZ@1236|Gammaproteobacteria,3XP02@561|Escherichia,COG0013@2|Bacteria			J
GUT_GENOME003907_03946	388.809	Oxidoreductase required for the transfer of electrons from pyruvate to flavodoxin	nifJ	TRUE	FALSE	1MVM0@1224|Proteobacteria,COG1013@1|root,1RNNX@1236|Gammaproteobacteria,COG0674@2|Bacteria,COG1014@1|root,COG1143@1|root,COG1014@2|Bacteria,COG1143@2|Bacteria,3XMK9@561|Escherichia,COG1013@2|Bacteria,COG0674@1|root			C
GUT_GENOME003916_02737	273	Ash protein family		TRUE	FALSE	1QUD0@1224|Proteobacteria,3XQ3Q@561|Escherichia,32WIS@2|Bacteria,2E13C@1|root,1T1U2@1236|Gammaproteobacteria
GUT_GENOME003916_03163	507			TRUE	TRUE		413			1	1
GUT_GENOME003958_00327	640.513	Plays an important role in bacterial chemotaxis signal transduction pathway by accelerating the dephosphorylation of phosphorylated CheY (CheY-P)	cheZ	TRUE	TRUE	1RNG2@1236|Gammaproteobacteria,3XM8Y@561|Escherichia,COG3143@2|Bacteria,1NIV6@1224|Proteobacteria,COG3143@1|root			J,N,T
GUT_GENOME003958_00369	621.423	YhhN family	yhhN	TRUE	TRUE	COG3714@2|Bacteria,COG3714@1|root,3XMCW@561|Escherichia,1RNUV@1236|Gammaproteobacteria,1PN0I@1224|Proteobacteria
GUT_GENOME003958_00884	1172.09	Involved in the efflux of sugars. The physiological role may be the reduction of the intracellular concentration of toxic sugars or sugar metabolites	sotB	TRUE	TRUE	3XNX7@561|Escherichia,1MU9G@1224|Proteobacteria,COG2814@2|Bacteria,COG0477@1|root,1RPHV@1236|Gammaproteobacteria			E,G,P,R
GUT_GENOME003958_01150	859.689	Catalyzes the oxidation of 5,10- methylenetetrahydrofolate to 5,10-methenyltetrahydrofolate and then the hydrolysis of 5,10-methenyltetrahydrofolate to 10- formyltetrahydrofolate	folD	TRUE	TRUE	3XMYB@561|Escherichia,COG0190@2|Bacteria,COG0190@1|root,1MWU4@1224|Proteobacteria,1RNSW@1236|Gammaproteobacteria			F,H
GUT_GENOME003958_01321	846.523	Catalyzes the NADPH-dependent reduction of 7-cyano-7- deazaguanine (preQ0) to 7-aminomethyl-7-deazaguanine (preQ1)	queF	TRUE	TRUE	COG2904@1|root,1MW0M@1224|Proteobacteria,1RNXM@1236|Gammaproteobacteria,3XM7E@561|Escherichia,COG0780@1|root,COG0780@2|Bacteria,COG2904@2|Bacteria			F,J
GUT_GENOME003958_01394	930.287	Provides the precursors necessary for DNA synthesis. Catalyzes the biosynthesis of deoxyribonucleotides from the corresponding ribonucleotides	nrdA	TRUE	TRUE	COG0209@2|Bacteria,COG0209@1|root,1RMPV@1236|Gammaproteobacteria,1MUJ8@1224|Proteobacteria,3XP46@561|Escherichia			F
GUT_GENOME004054_04505	3022.01	ImcF-related N-terminal domain	icmF	FALSE	TRUE	1MV3D@1224|Proteobacteria,1RPQ2@1236|Gammaproteobacteria,3XQSN@561|Escherichia,COG3523@1|root,COG3523@2|Bacteria	861		U	0	0.933333
GUT_GENOME004109_00273	530.981	L-serine ammonia-lyase activity	tdcG	TRUE	TRUE	COG1760@2|Bacteria,1RMJZ@1236|Gammaproteobacteria,1MUZN@1224|Proteobacteria,COG1760@1|root,3XNG8@561|Escherichia			E
GUT_GENOME004136_02293	2015.27	Evidence 3 Function proposed based on presence of conserved amino acid motif, structural feature or limited homology		TRUE	TRUE	1RPK7@1236|Gammaproteobacteria,COG1388@1|root,1MX9S@1224|Proteobacteria,COG1388@2|Bacteria	942		M	1	0.5
GUT_GENOME004136_04237	582	tail protein	I	TRUE	FALSE	1NZST@1224|Proteobacteria,1RQRK@1236|Gammaproteobacteria,COG4385@1|root,COG4385@2|Bacteria	1359		X	0.409396	0.0268456
GUT_GENOME004136_04238	1110.64	Baseplate J-like protein	J	TRUE	FALSE	COG3948@1|root,3ZMG0@590|Salmonella,1RNBJ@1236|Gammaproteobacteria,1MUFF@1224|Proteobacteria,COG3948@2|Bacteria	1359		X	0.409396	0.0268456
GUT_GENOME004136_04239	321	GPW Gp25 family protein		TRUE	FALSE	COG3628@2|Bacteria,COG3628@1|root,1SV6U@1236|Gammaproteobacteria,1Q03B@1224|Proteobacteria	1359		X	0.409396	0.0268456
GUT_GENOME004136_04240	461.16	Phage P2 GpU		TRUE	FALSE	1SQ2T@1236|Gammaproteobacteria,1QS31@1224|Proteobacteria,COG3499@1|root,COG3499@2|Bacteria	1359		X	0.409396	0.0268456
GUT_GENOME004136_04241	621	Type VI secretion system, phage-baseplate injector		TRUE	FALSE	COG4540@1|root,COG4540@2|Bacteria,1R639@1224|Proteobacteria,3ZMPE@590|Salmonella,1RYQ7@1236|Gammaproteobacteria	1359		X	0.409396	0.0268456
GUT_GENOME004136_04242	994.833	Phage late control gene D protein (GPD)		TRUE	FALSE	COG3500@2|Bacteria,1RMKC@1236|Gammaproteobacteria,1MXT8@1224|Proteobacteria,COG3500@1|root,3ZMH8@590|Salmonella	1359		X	0.409396	0.0268456
GUT_GENOME004136_04243	219	Tail protein		TRUE	FALSE	COG5004@2|Bacteria,COG5004@1|root	1359		U,X	0.409396	0.0268456
GUT_GENOME004136_04244	2600.23	phage tail tape measure protein		TRUE	FALSE	1NFKU@1224|Proteobacteria,1RP2D@1236|Gammaproteobacteria,COG5283@2|Bacteria,COG5283@1|root,3ZMPQ@590|Salmonella	1359		X	0.409396	0.0268456
GUT_GENOME004136_04245	282			TRUE	FALSE	1QT2Q@1224|Proteobacteria,339JX@2|Bacteria,2DQZS@1|root,1ST55@1236|Gammaproteobacteria	1359			0.409396	0.0268456
GUT_GENOME004136_04246	517.72	Phage tail tube protein FII		TRUE	FALSE	1SNUS@1236|Gammaproteobacteria,1MVR5@1224|Proteobacteria,3ZN0U@590|Salmonella,COG3498@2|Bacteria,COG3498@1|root	1359		X	0.409396	0.0268456
GUT_GENOME004136_04247	1464	Phage tail sheath C-terminal domain		TRUE	FALSE	COG3497@1|root,1MW1V@1224|Proteobacteria,1RNUT@1236|Gammaproteobacteria,3ZJI0@590|Salmonella,COG3497@2|Bacteria	1359		X	0.409396	0.0268456
GUT_GENOME004136_04248	291			TRUE	FALSE		1359			0.409396	0.0268456
GUT_GENOME004136_04249	485.846			TRUE	FALSE	1P1SP@1224|Proteobacteria,1SV3U@1236|Gammaproteobacteria,2DNJG@1|root,32XTU@2|Bacteria	1359			0.409396	0.0268456
GUT_GENOME004136_04250	345	ATP-binding sugar transporter from pro-phage		TRUE	FALSE	31BEZ@2|Bacteria,2E24F@1|root,1SQA4@1236|Gammaproteobacteria,1NZ20@1224|Proteobacteria	1359			0.409396	0.0268456
GUT_GENOME004136_04251	393			TRUE	FALSE		1359			0.409396	0.0268456
GUT_GENOME004136_04252	1034.48	Phage major capsid protein E	JD73_18860	TRUE	FALSE	3ZNF6@590|Salmonella,2Z8WK@2|Bacteria,2C57E@1|root,1RZPQ@1236|Gammaproteobacteria,1PPA2@1224|Proteobacteria	1359			0.409396	0.0268456
GUT_GENOME004136_04253	382.087			TRUE	FALSE	34801@2|Bacteria,1SRFG@1236|Gammaproteobacteria,1P2MV@1224|Proteobacteria,2CFXV@1|root	1359			0.409396	0.0268456
GUT_GENOME004136_04255	1522.25	Phage portal protein, lambda family		TRUE	FALSE	COG5511@2|Bacteria,COG5511@1|root,3ZNDB@590|Salmonella,1TB6B@1236|Gammaproteobacteria,1MVN4@1224|Proteobacteria	1359		X	0.409396	0.0268456
GUT_GENOME004136_04256	240			TRUE	FALSE	4QUK9@28883|Caudovirales,4QB54@10239|Viruses	1359			0.409396	0.0268456
GUT_GENOME004136_04257	1776.26	Phage terminase large subunit (GpA)		TRUE	FALSE	1RRH5@1236|Gammaproteobacteria,COG5525@2|Bacteria,3ZN97@590|Salmonella,COG5525@1|root,1MVS3@1224|Proteobacteria	1359		X	0.409396	0.0268456
GUT_GENOME004136_04258	552			TRUE	FALSE	33KED@2|Bacteria,2ESW0@1|root	1359			0.409396	0.0268456
GUT_GENOME004136_04259	585.621	ParB-like nuclease domain		TRUE	FALSE	COG1475@2|Bacteria,COG1475@1|root,3ZNF0@590|Salmonella,1TKI5@1236|Gammaproteobacteria,1PCSH@1224|Proteobacteria	1359		D,K	0.409396	0.0268456
GUT_GENOME004136_04260	716.73			TRUE	FALSE	32SUA@2|Bacteria,1SA0X@1236|Gammaproteobacteria,1N1VX@1224|Proteobacteria,2CTXP@1|root	1359			0.409396	0.0268456
GUT_GENOME004136_04265	300			TRUE	FALSE
GUT_GENOME004136_04270	278.317			TRUE	FALSE	32RJ4@2|Bacteria,2C7HM@1|root,1SC4G@1236|Gammaproteobacteria,1N65Y@1224|Proteobacteria	1359			0.409396	0.0268456
GUT_GENOME004136_04271	539.667	secretion activating protein		TRUE	FALSE	1MVXW@1224|Proteobacteria,1RRB6@1236|Gammaproteobacteria,COG3926@1|root,COG3926@2|Bacteria	1359		R	0.409396	0.0268456
GUT_GENOME004136_04272	297	Putative 3TM holin, Phage_holin_3		TRUE	FALSE	1N3YE@1224|Proteobacteria,1TCHY@1236|Gammaproteobacteria,2DN6I@1|root,32VTH@2|Bacteria,3WYXT@544|Citrobacter	1359			0.409396	0.0268456
GUT_GENOME004136_04273	395.56	Putative phage holin		TRUE	FALSE	1RIND@1224|Proteobacteria,1S7SQ@1236|Gammaproteobacteria,32CMP@2|Bacteria,3X3WI@547|Enterobacter,2BIF6@1|root	1359			0.409396	0.0268456
GUT_GENOME004136_04282	364.951			TRUE	FALSE	1NGFQ@1224|Proteobacteria,33G0V@2|Bacteria,2DSG7@1|root,1SGCS@1236|Gammaproteobacteria	1359			0.409396	0.0268456
GUT_GENOME004136_04283	282	Winged helix-turn-helix DNA-binding		TRUE	FALSE	arCOG08095@2157|Archaea,arCOG08095@1|root,2Y8H9@28890|Euryarchaeota,241B1@183963|Halobacteria	1359		K	0.409396	0.0268456
GUT_GENOME004136_04284	1095.63	Domain of unknown function (DUF3560)		TRUE	FALSE	COG4227@2|Bacteria,COG4227@1|root,1R782@1224|Proteobacteria,2VZR5@28216|Betaproteobacteria	1359		L	0.409396	0.0268456
GUT_GENOME004136_04285	378			TRUE	FALSE	1NMUJ@1224|Proteobacteria,1SHE6@1236|Gammaproteobacteria,2EKDH@1|root,33E3T@2|Bacteria	1359			0.409396	0.0268456
GUT_GENOME004136_04286	333	Protein of unknown function (DUF1064)		TRUE	FALSE	1NBUZ@1224|Proteobacteria,2E3AH@1|root,32YA0@2|Bacteria	1359			0.409396	0.0268456
GUT_GENOME004136_04287	404.876	Recombination enhancement, RecA-dependent nuclease		TRUE	FALSE	1QF83@1224|Proteobacteria,32IKQ@2|Bacteria,2BPTC@1|root,1TCCB@1236|Gammaproteobacteria,1YK6B@136841|Pseudomonas aeruginosa group	1359			0.409396	0.0268456
GUT_GENOME004136_04288	234			TRUE	FALSE		1359			0.409396	0.0268456
GUT_GENOME004136_04289	513.68			TRUE	FALSE		1359			0.409396	0.0268456
GUT_GENOME004136_04290	494.907			TRUE	FALSE		1359			0.409396	0.0268456
GUT_GENOME004136_04291	658.097	Helix-turn-helix XRE-family like proteins		TRUE	FALSE	1V96W@1239|Firmicutes,4I19R@91061|Bacilli,COG3655@2|Bacteria,COG3655@1|root	1359		K	0.409396	0.0268456
GUT_GENOME004136_04292	375			TRUE	FALSE		1359			0.409396	0.0268456
GUT_GENOME004136_04293	654	CobQ/CobB/MinD/ParA nucleotide binding domain		TRUE	FALSE	COG1192@2|Bacteria,1S8YG@1236|Gammaproteobacteria,COG1192@1|root,1R3XM@1224|Proteobacteria	1359		D,N	0.409396	0.0268456
GUT_GENOME004136_04294	249			TRUE	FALSE	33EY4@2|Bacteria,2EM8Z@1|root,1NMWK@1224|Proteobacteria	1359			0.409396	0.0268456
GUT_GENOME004136_04298	268.191			TRUE	FALSE	1ST6V@1236|Gammaproteobacteria,1PB0W@1224|Proteobacteria,2CFD2@1|root,2ZS6H@2|Bacteria	1359			0.409396	0.0268456
GUT_GENOME004136_04299	381			TRUE	FALSE		1359			0.409396	0.0268456
GUT_GENOME004136_04300	300	sequence-specific DNA binding	proV	TRUE	FALSE	COG3620@1|root,COG3620@2|Bacteria	1359		K	0.409396	0.0268456
GUT_GENOME004136_04301	343.7	PFAM Phage derived protein Gp49-like (DUF891)	VY92_07350	TRUE	FALSE	COG4683@2|Bacteria,COG4683@1|root	1359		K	0.409396	0.0268456
GUT_GENOME004136_04302	264			TRUE	FALSE	2ZFXC@2|Bacteria,1PAF9@1224|Proteobacteria,1SWEQ@1236|Gammaproteobacteria,28TQ2@1|root	1359			0.409396	0.0268456
GUT_GENOME004136_04303	287.707			TRUE	FALSE	330WQ@2|Bacteria,2W3M8@28216|Betaproteobacteria,1KAUX@119060|Burkholderiaceae,2E68H@1|root,1ND48@1224|Proteobacteria	1359			0.409396	0.0268456
GUT_GENOME004136_04304	954.325	This protein is essential for plasmid replication	repA1	TRUE	FALSE	32GWB@2|Bacteria,2C19W@1|root,1S6KF@1236|Gammaproteobacteria,1MYMZ@1224|Proteobacteria	1359			0.409396	0.0268456
GUT_GENOME004136_04825	588.661			TRUE	FALSE	3451Z@2|Bacteria,2FCZC@1|root,1SSUT@1236|Gammaproteobacteria,1P2FS@1224|Proteobacteria
GUT_GENOME004244_01699	312			TRUE	TRUE		187			1	1
GUT_GENOME004244_02924	419.941	Probable zinc-ribbon		TRUE	TRUE	2E2VY@1|root,33CH0@2|Bacteria,1NISC@1224|Proteobacteria,1SHVY@1236|Gammaproteobacteria	700			1	1
GUT_GENOME004289_00085	588.694	Caudovirales tail fibre assembly protein, lambda gpK	tfaE	TRUE	FALSE	COG2110@2|Bacteria,COG2110@1|root,1RDMN@1224|Proteobacteria,1S6U8@1236|Gammaproteobacteria,3XR1I@561|Escherichia	1864		J	1	0
GUT_GENOME004289_00213	381.375	probably responsible for the translocation of the substrate across the membrane	malF	FALSE	TRUE	COG1175@2|Bacteria,COG1175@1|root,3XP8S@561|Escherichia,1RN6B@1236|Gammaproteobacteria,1MXKR@1224|Proteobacteria			G
GUT_GENOME004289_00514	1159.1	Protein of unknown function DUF262		FALSE	TRUE	COG1479@1|root,COG1479@2|Bacteria,4PDZ8@976|Bacteroidetes,1I1NB@117743|Flavobacteriia	448		K,V	0	1
GUT_GENOME004289_00516	296.7			FALSE	TRUE
GUT_GENOME004289_00567	1654.35	it may function in amino acid uptake salvage, or possibly in peptidoglycan linkage. Catalyzes the hydrolysis and transpeptidation of many gamma-glutamyl compounds (including some D-gamma-glutamyl substrates), with a preference for basic and aromatic amino acids as acceptors. The KM values for gamma-glutamyl acceptors are so high that it has been proposed transpeptidation is not the physiological …	ggt	TRUE	TRUE	1MUV6@1224|Proteobacteria,1RMIT@1236|Gammaproteobacteria,COG0405@1|root,COG0405@2|Bacteria,3XN4W@561|Escherichia			E,M
GUT_GENOME004289_00581	1294.5	Component of the transport system for branched-chain amino acids	brnQ	TRUE	TRUE	1MVIF@1224|Proteobacteria,COG1114@2|Bacteria,COG1114@1|root,1RR3P@1236|Gammaproteobacteria,3XMX4@561|Escherichia			E
GUT_GENOME004289_01209	586.513	Regulates secA expression by translational coupling of the secM secA operon. Translational pausing at a specific Pro residue 5 residues before the end of the protein may allow disruption of a mRNA repressor helix that normally suppresses secA translation initiation	secM	TRUE	TRUE	3XPHV@561|Escherichia,1S7VM@1236|Gammaproteobacteria,2ATX7@1|root,31JGK@2|Bacteria,1RC3K@1224|Proteobacteria			U
GUT_GENOME004289_02138	285	anaerobic respiration	yjjI	TRUE	TRUE	COG1328@2|Bacteria,COG1328@1|root,3XMK1@561|Escherichia,1RP1S@1236|Gammaproteobacteria,1N1EN@1224|Proteobacteria			F
GUT_GENOME004396_02904	1312.78	The phosphoenolpyruvate-dependent sugar phosphotransferase system (PTS), a major carbohydrate active -transport system, catalyzes the phosphorylation of incoming sugar substrates concomitant with their translocation across the cell membrane	sgcC	TRUE	TRUE	COG3775@2|Bacteria,1RQ76@1236|Gammaproteobacteria,3XR17@561|Escherichia,1MVRC@1224|Proteobacteria,COG3775@1|root	911		G	1	1
GUT_GENOME004456_00574	630.884	Condenses 4-methyl-5-(beta-hydroxyethyl)thiazole monophosphate (THZ-P) and 2-methyl-4-amino-5-hydroxymethyl pyrimidine pyrophosphate (HMP-PP) to form thiamine monophosphate (TMP)	thiE	TRUE	TRUE	COG0352@2|Bacteria,COG0352@1|root,1RDSU@1224|Proteobacteria,3XMY1@561|Escherichia,1SYGR@1236|Gammaproteobacteria			H
GUT_GENOME004456_03844	1033.89	Conserved hypothetical protein 698	yeiH	TRUE	TRUE	1MVIP@1224|Proteobacteria,COG2855@1|root,COG2855@2|Bacteria,3XNYN@561|Escherichia,1RPSG@1236|Gammaproteobacteria
GUT_GENOME004456_03870	455.15			TRUE	TRUE		1438			0.6	1
GUT_GENOME004456_04180	264			TRUE	TRUE
GUT_GENOME004506_00548	444.13	shape-determining protein MreC	mreC	TRUE	FALSE	COG1792@2|Bacteria,1N8ZS@1224|Proteobacteria,COG1792@1|root,1RMK4@1236|Gammaproteobacteria,3XNFQ@561|Escherichia			D,M,Z
GUT_GENOME004506_00771	1067.27	Outer membrane protein N	ompN	TRUE	TRUE	1RNBS@1236|Gammaproteobacteria,COG3203@1|root,1MVRY@1224|Proteobacteria,COG3203@2|Bacteria,3XN4M@561|Escherichia			M
GUT_GENOME004506_01400	996.334	COG1502 Phosphatidylserine phosphatidylglycerophosphate cardiolipi n synthases and related enzymes	clsC	TRUE	TRUE	COG1502@2|Bacteria,COG1502@1|root,1RMIF@1236|Gammaproteobacteria,1MUDJ@1224|Proteobacteria			I
GUT_GENOME004506_01615	585	Is probably a protein kinase regulator of UbiI activity which is involved in aerobic coenzyme Q (ubiquinone) biosynthesis	ubiB	TRUE	FALSE	1MU1Z@1224|Proteobacteria,1RNQM@1236|Gammaproteobacteria,COG0661@2|Bacteria,COG0661@1|root,3XNRF@561|Escherichia	2124		H,T	1	0
GUT_GENOME004506_01695	850.544	Formate dehydrogenase allows E.coli to use formate as major electron donor during anaerobic respiration, when nitrate is used as electron acceptor. The alpha subunit FdnG contains the formate oxidation site. Electrons are transferred from formate to menaquinone in the gamma subunit (FdnI), through the 4Fe-4S clusters in the beta subunit (FdnH). Formate dehydrogenase-N is part of a system that gen…	fdnG	TRUE	TRUE	COG0243@1|root,COG3383@2|Bacteria,1MW3N@1224|Proteobacteria,COG3383@1|root,COG0243@2|Bacteria,1RN6N@1236|Gammaproteobacteria,3XM6Z@561|Escherichia			C,R
GUT_GENOME004506_01814	481	Permease protein	sapC	TRUE	TRUE	1T1RQ@1236|Gammaproteobacteria,COG4171@2|Bacteria,1QUAT@1224|Proteobacteria,3XPG2@561|Escherichia,COG4171@1|root	2437		V	1	1
GUT_GENOME004506_01972	735.308	Required for disulfide bond formation in some periplasmic proteins. Acts by transferring its disulfide bond to other proteins and is reduced in the process	dsbG	TRUE	TRUE	1NEFD@1224|Proteobacteria,COG1651@2|Bacteria,1RQAW@1236|Gammaproteobacteria,COG1651@1|root,3XNA2@561|Escherichia			O
GUT_GENOME004518_00653	801	Transport Permease Protein	kpsM	FALSE	TRUE	1MUTE@1224|Proteobacteria,1RZ4T@1236|Gammaproteobacteria,COG1682@1|root,COG1682@2|Bacteria			G,M
GUT_GENOME004518_00654	651	ABC transporter	kpsT	FALSE	TRUE	COG1134@2|Bacteria,COG1134@1|root,3W05N@53335|Pantoea,1RN2T@1236|Gammaproteobacteria,1MWWC@1224|Proteobacteria			G,M
GUT_GENOME004518_00655	1233	COG3524 Capsule polysaccharide export protein		FALSE	TRUE	1RPZH@1236|Gammaproteobacteria,1R3ZY@1224|Proteobacteria,1Y4GH@135624|Aeromonadales,COG3524@1|root,COG3524@2|Bacteria	2275		M	0	0.909091
GUT_GENOME004518_00656	966.444	Glycosyltransferase like family 2		FALSE	TRUE	1RJPX@1224|Proteobacteria,1S1SB@1236|Gammaproteobacteria,COG1215@1|root,COG1215@2|Bacteria,COG1216@1|root,COG1216@2|Bacteria			G,M,N
GUT_GENOME004518_00660	873	Glycosyltransferase family 92		FALSE	TRUE	1MXQB@1224|Proteobacteria,1SC13@1236|Gammaproteobacteria,COG0463@1|root,COG0463@2|Bacteria			M
GUT_GENOME004518_00662	1020.14	Glycosyl transferases group 1		FALSE	TRUE	COG0438@2|Bacteria,COG0438@1|root,1Y5RM@135624|Aeromonadales,1RREQ@1236|Gammaproteobacteria,1R662@1224|Proteobacteria	2275		M	0	0.909091
GUT_GENOME004518_00663	1062.2	Belongs to the NAD(P)-dependent epimerase dehydratase family. dTDP-glucose dehydratase subfamily	rfbB	FALSE	TRUE	COG1088@2|Bacteria,1MU5E@1224|Proteobacteria,1RP7G@1236|Gammaproteobacteria,1Y3X0@135624|Aeromonadales,COG1088@1|root	2275		M	0	0.909091
GUT_GENOME004518_00664	877.924	Catalyzes the reduction of dTDP-6-deoxy-L-lyxo-4- hexulose to yield dTDP-L-rhamnose	rfbD	FALSE	TRUE	1RSNR@1236|Gammaproteobacteria,1MUXM@1224|Proteobacteria,1Y4JH@135624|Aeromonadales,COG1091@1|root,COG1091@2|Bacteria	2275		M	0	0.909091
GUT_GENOME004518_00665	861.593	Catalyzes the formation of dTDP-glucose, from dTTP and glucose 1-phosphate, as well as its pyrophosphorolysis	rfbA	FALSE	TRUE	1MU0X@1224|Proteobacteria,1RMTR@1236|Gammaproteobacteria,1Y3FI@135624|Aeromonadales,COG1209@1|root,COG1209@2|Bacteria	2275		M	0	0.909091
GUT_GENOME004518_00667	2120.83	Capsule polysaccharide biosynthesis protein		FALSE	TRUE	1MW0T@1224|Proteobacteria,COG3563@2|Bacteria,COG3563@1|root,3XP1R@561|Escherichia,1RPMS@1236|Gammaproteobacteria	2275		M	0	0.909091
GUT_GENOME004550_00988	808.296	A murein DD-endopeptidase with specificity for D-Ala- meso-diaminopimelic acid (mDAP) cross-links. Its role is probably to cleave D-Ala-mDAP cross-links to allow insertion of new glycans and thus cell wall expansion. Functionally redundant with MepM and MepH. Partially suppresses an mepS disruption mutant	ydhO	TRUE	TRUE	COG0791@1|root,1N0EE@1224|Proteobacteria,1RP3P@1236|Gammaproteobacteria,COG0791@2|Bacteria,3XN56@561|Escherichia			M
GUT_GENOME004550_03772	1343.79	Is the initiating enzyme for colanic acid (CA) synthesis. Catalyzes the transfer of the glucose-1-phosphate moiety from UDP-Glc onto the carrier lipid undecaprenyl phosphate (C55-P), forming a phosphoanhydride bond yielding to glucosyl- pyrophosphoryl-undecaprenol (Glc-PP-C55). Also possesses a weak galactose-1-P transferase activity	wcaJ	TRUE	TRUE	1RMMN@1236|Gammaproteobacteria,1MV6W@1224|Proteobacteria,COG2148@1|root,COG2148@2|Bacteria,3XMRD@561|Escherichia	276		M	1	1
GUT_GENOME004550_03900	910.158	Catalyzes the tRNA-independent activation of glutamate in presence of ATP and the subsequent transfer of glutamate onto a tRNA(Asp). Glutamate is transferred on the 2-amino-5-(4,5- dihydroxy-2-cyclopenten-1-yl) moiety of the queuosine in the wobble position of the QUC anticodon	gluQ	TRUE	TRUE	COG0008@2|Bacteria,COG0008@1|root,1RMYQ@1236|Gammaproteobacteria,1MUN7@1224|Proteobacteria,3XN6X@561|Escherichia			J
GUT_GENOME004568_03183	460.99	Pore-forming subunit of a potassium efflux system that confers protection against electrophiles. Catalyzes K( ) H( ) antiport	kefB	TRUE	TRUE	1MV34@1224|Proteobacteria,1RNVR@1236|Gammaproteobacteria,COG1226@2|Bacteria,COG1226@1|root,COG0475@2|Bacteria,COG0475@1|root,3XNFT@561|Escherichia			P
GUT_GENOME004568_03418	802.967	Major intrinsic protein	glpF	FALSE	TRUE	1RP2X@1236|Gammaproteobacteria,1MXTJ@1224|Proteobacteria,3XQX3@561|Escherichia,COG0580@1|root,COG0580@2|Bacteria	352		G	0	1
GUT_GENOME004568_03579	249			FALSE	TRUE
GUT_GENOME004568_03819	347.071	Chemotaxis protein cheA	cheA	TRUE	FALSE	COG2198@1|root,COG0643@2|Bacteria,COG0643@1|root,3XM5T@561|Escherichia,COG2198@2|Bacteria,1RMS6@1236|Gammaproteobacteria,1MUAG@1224|Proteobacteria	52		N,T	1	0
GUT_GENOME004568_03956	536.337	Belongs to the PHP family	ycdX	TRUE	TRUE	COG1387@2|Bacteria,1MYXV@1224|Proteobacteria,COG1387@1|root,3XNRR@561|Escherichia,1RRE9@1236|Gammaproteobacteria			E,R
GUT_GENOME004585_02616	1381.77	DNA/protein translocase of phage P22 injectosome		TRUE	FALSE	1P5AN@1224|Proteobacteria,1RYT0@1236|Gammaproteobacteria,COG1835@1|root,COG1835@2|Bacteria			I,M
GUT_GENOME004585_04039	475.793	Binds RpoD and negatively regulates RpoD-mediated transcription activation by preventing the interaction between the primary sigma factor RpoD with the catalytic core of the RNA polymerase and with promoter DNA. May be involved in replacement of the RNA polymerase sigma subunit from RpoD to RpoS during the transition from exponential growth to the stationary phase	rsd	TRUE	TRUE	1RHBB@1224|Proteobacteria,COG3160@2|Bacteria,1S420@1236|Gammaproteobacteria,COG3160@1|root,3XPHA@561|Escherichia			K
GUT_GENOME004625_02643	887.364	regulation of response to stimulus	yddK	TRUE	TRUE	COG4886@2|Bacteria,COG4886@1|root	2690		K	1	1
GUT_GENOME004625_03682	393.805	This protein catalyzes the inversion of an 1800-bp E.coli DNA fragment, the P region, which can exist in either orientation. The function of the inversion is not yet clear	pinE	TRUE	TRUE	1RR4F@1236|Gammaproteobacteria,1MVXQ@1224|Proteobacteria,COG2801@2|Bacteria,COG2801@1|root,3ZNBZ@590|Salmonella	2648		L,X	1	1
GUT_GENOME004652_03378	255.857	The phosphoenolpyruvate-dependent sugar phosphotransferase system (sugar PTS), a major carbohydrate active transport system, catalyzes the phosphorylation of incoming sugar substrates concomitantly with their translocation across the cell membrane. The enzyme II complex composed of SrlA, SrlB and SrlE is involved in glucitol sorbitol transport. It can also use D- mannitol	srlB	TRUE	TRUE	COG3731@2|Bacteria,COG3731@1|root,1RK6V@1224|Proteobacteria,1S6MU@1236|Gammaproteobacteria,3XQY8@561|Escherichia	1744		G	1	1
GUT_GENOME004652_03571	260.705	cellular response to DNA damage stimulus	ybiJ	TRUE	TRUE	2E4GN@1|root,32ZBU@2|Bacteria,1N77S@1224|Proteobacteria,1SCDN@1236|Gammaproteobacteria,3XPWP@561|Escherichia
GUT_GENOME004652_03698	458.571	Belongs to the frataxin family	cyaY	TRUE	TRUE	1RH9A@1224|Proteobacteria,1S5UP@1236|Gammaproteobacteria,COG1965@1|root,COG1965@2|Bacteria,3XPP1@561|Escherichia			P
GUT_GENOME004734_00094	303			TRUE	FALSE
GUT_GENOME004734_00426	1103.29	Specifically methylates the guanine in position 1835 (m2G1835) of 23S rRNA	rlmG	TRUE	TRUE	COG2813@2|Bacteria,1NEMR@1224|Proteobacteria,COG2813@1|root,1RMXE@1236|Gammaproteobacteria,3XMGF@561|Escherichia			J
GUT_GENOME004734_00777	1023.99	Transcriptional regulator GalR	galR	TRUE	TRUE	1MU1G@1224|Proteobacteria,COG1609@2|Bacteria,COG1609@1|root,3XNH3@561|Escherichia,1RMSP@1236|Gammaproteobacteria			K
GUT_GENOME004734_01850	575.104	prophage		FALSE	TRUE	1S10J@1236|Gammaproteobacteria,2ZT0R@2|Bacteria,1R6UI@1224|Proteobacteria,295PD@1|root,3XPQS@561|Escherichia	2405			0	1
GUT_GENOME004734_03674	473.321	Phage major tail protein 2		FALSE	TRUE	4QXUP@35237|dsDNA viruses no RNA stage,4QAVQ@10239|Viruses,4QPGB@28883|Caudovirales,4QKPR@10699|Siphoviridae
GUT_GENOME004734_03677	660	Type VI secretion system VasI, EvfG, VC_A0118		FALSE	TRUE	2UK4B@28211|Alphaproteobacteria,1RBV9@1224|Proteobacteria,28PTC@1|root,2ZCEM@2|Bacteria
GUT_GENOME004734_04134	1114.68	cellular response to DNA damage stimulus	yjhC	FALSE	TRUE	COG0673@2|Bacteria,COG0673@1|root,1PE4Q@1224|Proteobacteria,1S1B3@1236|Gammaproteobacteria	2224		R	0	0.666667
GUT_GENOME004734_04372	499.877	Transcriptional	mprA	TRUE	TRUE	COG1846@1|root,COG1846@2|Bacteria,1NWZ4@1224|Proteobacteria,1RPCJ@1236|Gammaproteobacteria	890		K	1	1
GUT_GENOME004734_04531	580.471	Protein of unknown function (DUF3261)		FALSE	TRUE	1MXPI@1224|Proteobacteria,1RSJZ@1236|Gammaproteobacteria,28KUK@1|root,2ZABB@2|Bacteria,3XQW7@561|Escherichia	789			0	1
GUT_GENOME004805_03558	1916.91			TRUE	TRUE	1RNFD@1236|Gammaproteobacteria,COG4733@2|Bacteria,COG4733@1|root,1MXXZ@1224|Proteobacteria	2444		X	1	1
GUT_GENOME004885_03789	576.139	Deoxycytidine triphosphate deaminase	dcd	TRUE	TRUE	COG0717@1|root,1MV2J@1224|Proteobacteria,1RMCD@1236|Gammaproteobacteria,COG0717@2|Bacteria,3XNIE@561|Escherichia			F
GUT_GENOME004899_00155	1375.13	Belongs to the beta-eliminating lyase family	tnaA	TRUE	TRUE	COG3033@2|Bacteria,3XP83@561|Escherichia,COG3033@1|root,1RS6E@1236|Gammaproteobacteria,1NG5U@1224|Proteobacteria			E
GUT_GENOME004899_00615	529.935	Involved in regulation of length and mediation of adhesion of type 1 fimbriae (but not necessary for the production of fimbriae). Involved in the integration of FimH in the fimbriae	fimF	TRUE	TRUE	1S138@1236|Gammaproteobacteria,COG3539@2|Bacteria,COG3539@1|root,1R6J8@1224|Proteobacteria,3XN73@561|Escherichia	285		N,U	1	1
GUT_GENOME004899_01968	241.385			TRUE	FALSE	2EM7I@1|root,2JEJH@204037|Dickeya,33EWN@2|Bacteria,1NGM4@1224|Proteobacteria,1SGBS@1236|Gammaproteobacteria	1726			0.875	0
GUT_GENOME004899_02079	1952.07	Capsule polysaccharide biosynthesis protein	kpsC	TRUE	FALSE	COG3563@2|Bacteria,1MW0T@1224|Proteobacteria,1RPMS@1236|Gammaproteobacteria,3XP1R@561|Escherichia,COG3563@1|root	1039		M	1	0.142857
GUT_GENOME004899_02120	643.985	Belongs to the phosphoglycerate mutase family. GpmB subfamily	gpmB	TRUE	TRUE	1NPC4@1224|Proteobacteria,1RSEU@1236|Gammaproteobacteria,3XN8A@561|Escherichia,COG0406@1|root,COG0406@2|Bacteria			F,G
GUT_GENOME004899_02871	552.52	protein secretion	yhiI	TRUE	TRUE	COG0845@2|Bacteria,COG0845@1|root,3XP98@561|Escherichia,1MUG6@1224|Proteobacteria,1RS3I@1236|Gammaproteobacteria			M,V
GUT_GENOME004899_03072	2421.95	Cell wall formation. Synthesis of cross-linked peptidoglycan from the lipid intermediates. The enzyme has a penicillin-insensitive transglycosylase N-terminal domain (formation of linear glycan strands) and a penicillin-sensitive transpeptidase C-terminal domain (cross-linking of the peptide subunits)	mrcB	TRUE	TRUE	COG0744@1|root,COG0744@2|Bacteria,1RNHV@1236|Gammaproteobacteria,1QTST@1224|Proteobacteria,3XM7W@561|Escherichia			M
GUT_GENOME004899_03082	1309.93	N-acetylmuramoyl-L-alanine amidase	amiB	TRUE	TRUE	1MUQK@1224|Proteobacteria,1RMP1@1236|Gammaproteobacteria,COG0860@1|root,COG0860@2|Bacteria,3XN8B@561|Escherichia			M
GUT_GENOME004899_03436	771.25	Plays a critical role in the metabolism of the essential lipid carrier used for cell wall synthesis	ycbC	TRUE	TRUE	COG1434@2|Bacteria,COG1434@1|root,1RNZC@1236|Gammaproteobacteria,1MVW8@1224|Proteobacteria			M
GUT_GENOME004899_03465	1096.67	transmembrane transport	ybiR	TRUE	TRUE	1NEVR@1224|Proteobacteria,1RQVD@1236|Gammaproteobacteria,COG1055@1|root,COG1055@2|Bacteria,3XMSH@561|Escherichia			P
GUT_GENOME004928_03094	1622.75	Belongs to the sodium solute symporter (SSF) (TC 2.A.21) family	yidK	TRUE	TRUE	1RR4S@1236|Gammaproteobacteria,COG4146@1|root,COG4146@2|Bacteria,1MXWV@1224|Proteobacteria	283		E,R	1	1
GUT_GENOME004956_03124	575.951	Membrane		FALSE	TRUE	COG4648@1|root,1S9TC@1236|Gammaproteobacteria,1N0PK@1224|Proteobacteria,COG4648@2|Bacteria	789		I	0	1
GUT_GENOME004963_00152	792.882	Involved in chromosome condensation, segregation and cell cycle progression. May participate in facilitating chromosome segregation by condensation DNA from both sides of a centrally located replisome during cell division. Not required for mini-F plasmid partitioning. Probably acts via its interaction with MukB and MukE. Overexpression results in anucleate cells. It has a calcium binding activity	mukF	FALSE	TRUE	1N0D6@1224|Proteobacteria,1RN7P@1236|Gammaproteobacteria,COG3006@2|Bacteria,COG3006@1|root,3XNX3@561|Escherichia	1069		D	0	1
GUT_GENOME004963_00492	1011.94	Protein of unknown function (DUF1116)	ylbE	TRUE	TRUE	COG0074@1|root,COG0074@2|Bacteria,1RQEG@1236|Gammaproteobacteria,1MX67@1224|Proteobacteria,3XQNV@561|Escherichia			C
GUT_GENOME004963_03455	473.268	4Fe-4S binding domain	yiaI	TRUE	TRUE	COG1142@2|Bacteria,COG1142@1|root,1RAJI@1224|Proteobacteria,1S1ZU@1236|Gammaproteobacteria,3XM83@561|Escherichia			C
GUT_GENOME005082_03275	249.009	Transglycosylase associated protein	yeaQ	TRUE	TRUE	COG2261@1|root,1S8YP@1236|Gammaproteobacteria,1N72W@1224|Proteobacteria,COG2261@2|Bacteria,3XR58@561|Escherichia			R
GUT_GENOME005082_04476	1079.5	lacI family		TRUE	TRUE	COG1609@1|root,COG1609@2|Bacteria,4BAFF@82115|Rhizobiaceae,2TV5N@28211|Alphaproteobacteria,1R47N@1224|Proteobacteria			K
GUT_GENOME005104_00178	608.746	surface presentation of antigens protein	spaS	FALSE	TRUE	COG1377@1|root,COG1377@2|Bacteria,1RRI9@1236|Gammaproteobacteria,1NC6M@1224|Proteobacteria	2677		N,U	0.363636	0.727273
GUT_GENOME005104_03602	1924.49	Usher protein		TRUE	TRUE	COG3188@2|Bacteria,1MUHE@1224|Proteobacteria,COG3188@1|root,1RMPU@1236|Gammaproteobacteria	2529		N,U,W	1	1
GUT_GENOME005104_04494	568.625			FALSE	TRUE
GUT_GENOME005132_00775	463.591	Protein of unknown function (DUF2824)		TRUE	FALSE	1SMKS@1236|Gammaproteobacteria,33PCT@2|Bacteria,1NTSP@1224|Proteobacteria,2EVZ7@1|root	1735			0.5	0
GUT_GENOME005203_00751	1186.2	Required for the use of extracellular DNA as a nutrient. Could be the porin responsible for transport of DNA across the outer membrane	pilQ	TRUE	TRUE	1QTT6@1224|Proteobacteria,1RN3Z@1236|Gammaproteobacteria,COG4796@1|root,COG4796@2|Bacteria,3XPCW@561|Escherichia			U
GUT_GENOME005203_00902	595.176	Component of the sulfite reductase complex that catalyzes the 6-electron reduction of sulfite to sulfide. This is one of several activities required for the biosynthesis of L- cysteine from sulfate	cysI	FALSE	TRUE	COG0155@1|root,COG0155@2|Bacteria,1MVVB@1224|Proteobacteria,1RMFH@1236|Gammaproteobacteria,3XMSN@561|Escherichia	1827		H,P	0	1
GUT_GENOME005203_01554	510.474	ethanolamine metabolic process	eutQ	TRUE	TRUE	1R6MF@1224|Proteobacteria,1RRZH@1236|Gammaproteobacteria,3XMB2@561|Escherichia,COG4766@1|root,COG4766@2|Bacteria			E
GUT_GENOME005203_02455	1137.34	Catalyzes the conversion of UDP-4-keto-arabinose (UDP- Ara4O) to UDP-4-amino-4-deoxy-L-arabinose (UDP-L-Ara4N). The modified arabinose is attached to lipid A and is required for resistance to polymyxin and cationic antimicrobial peptides	arnB	TRUE	TRUE	COG0399@2|Bacteria,COG0399@1|root,3XMQ3@561|Escherichia,1MUPN@1224|Proteobacteria,1RMCS@1236|Gammaproteobacteria			M
GUT_GENOME005274_02670	1185.47			TRUE	FALSE	2Z8CC@2|Bacteria,2DBCB@1|root	869			0.428571	0
GUT_GENOME005274_03192	956.982	Periplasmic protein	tbpA	TRUE	TRUE	COG4143@1|root,COG4143@2|Bacteria,1RMQ9@1236|Gammaproteobacteria,1MUBB@1224|Proteobacteria,3XNCI@561|Escherichia			H,P
GUT_GENOME005274_03562	1789.46	cysteine-type carboxypeptidase activity	ycbB	TRUE	TRUE	COG2989@1|root,1MV14@1224|Proteobacteria,1RQR7@1236|Gammaproteobacteria,COG2989@2|Bacteria,3XP8Y@561|Escherichia			M
GUT_GENOME005274_04187	945.736	Polysulphide reductase, NrfD	nrfD	TRUE	TRUE	3XNMB@561|Escherichia,COG3301@2|Bacteria,COG3301@1|root,1MXQ9@1224|Proteobacteria,1RQ22@1236|Gammaproteobacteria			P
GUT_GENOME005309_00001	439.255	response to oxidative stress	yfdK	TRUE	FALSE	32TR7@2|Bacteria,1N14T@1224|Proteobacteria,2DMUG@1|root,1SB31@1236|Gammaproteobacteria,3ZNCG@590|Salmonella
GUT_GENOME005316_00105	757.179	Catalyzes the reversible reduction of 2,5-diketo-3- deoxygluconate (DKII or 4,6-dihydroxy-2,5-dioxohexanoate) into 2- keto-3-deoxygluconate (KDG or 2-dehydro-3-deoxygluconate) with a concomitant oxidation of NADH (Ref.4). To a lesser extent, can also reduce 5-keto-D-gluconate and oxidize D-gluconate and 1,2- propanediol. Together with KduI, seems to play a role in the catabolism of hexuronates un…	kduD	TRUE	TRUE	3XP6J@561|Escherichia,COG1028@1|root,COG1028@2|Bacteria,1MWB6@1224|Proteobacteria,1RMZB@1236|Gammaproteobacteria			I,Q
GUT_GENOME005316_00290	513.5	Involved in the cellular defense against the biological effects of O6-methylguanine (O6-MeG) and O4-methylthymine (O4-MeT) in DNA. Repairs the methylated nucleobase in DNA by stoichiometrically transferring the methyl group to a cysteine residue in the enzyme. This is a suicide reaction the enzyme is irreversibly inactivated	ogt	TRUE	TRUE	COG0350@1|root,1N2YQ@1224|Proteobacteria,COG0350@2|Bacteria,1S68H@1236|Gammaproteobacteria,3XMKI@561|Escherichia			J,L
GUT_GENOME005316_01423	1231.33	helix_turn_helix gluconate operon transcriptional repressor	gabR_2	TRUE	TRUE	COG1167@2|Bacteria,3XNB9@561|Escherichia,1RPFK@1236|Gammaproteobacteria,1MVGT@1224|Proteobacteria,COG1167@1|root	764		E,K	1	1
GUT_GENOME005316_01466	708.204	phosphoribosylaminoimidazolesuccinocarboxamide synthase activity	purC	TRUE	TRUE	1MUR9@1224|Proteobacteria,1RNNY@1236|Gammaproteobacteria,COG0152@2|Bacteria,COG0152@1|root,3XMYR@561|Escherichia			F
GUT_GENOME005316_01803	1614.51	sodium ion import across plasma membrane	yjcE	TRUE	TRUE	COG0025@2|Bacteria,1RPH6@1236|Gammaproteobacteria,1MW5T@1224|Proteobacteria,COG0025@1|root,3XN4E@561|Escherichia			P
GUT_GENOME005316_01949	319.034	Modulates cellular lipopolysaccharide (LPS) levels by regulating LpxC, which is involved in lipid A biosynthesis. May act by modulating the proteolytic activity of FtsH towards LpxC. May also coordinate assembly of proteins involved in LPS synthesis at the plasma membrane	lapB	TRUE	FALSE	COG2956@2|Bacteria,COG2956@1|root,1RP29@1236|Gammaproteobacteria,1MVDP@1224|Proteobacteria,3XNQF@561|Escherichia	688		G,M	1	0
GUT_GENOME005316_02133	1345.12	Belongs to the class-I aminoacyl-tRNA synthetase family	cysS	TRUE	TRUE	COG0215@1|root,1RP5K@1236|Gammaproteobacteria,1MV8H@1224|Proteobacteria,COG0215@2|Bacteria,3XMKF@561|Escherichia			J
GUT_GENOME005316_03391	413	Murein endopeptidase that cleaves the D-alanyl-meso-2,6- diamino-pimelyl amide bond that connects peptidoglycan strands. Likely plays a role in the removal of murein from the sacculus	mepA	TRUE	TRUE	1MU9I@1224|Proteobacteria,1RMJK@1236|Gammaproteobacteria,3XMNR@561|Escherichia,COG3770@1|root,COG3770@2|Bacteria	168		M	1	1
GUT_GENOME005316_03526	696.387	Cellulose biosynthesis protein BcsQ	yhjQ	TRUE	TRUE	3XMY2@561|Escherichia,COG1192@2|Bacteria,1MXFI@1224|Proteobacteria,1RYAG@1236|Gammaproteobacteria,COG1192@1|root			D,N
GUT_GENOME005316_04198	480	Catalyzes the decarboxylation of 3-keto-L-gulonate-6-P into L-xylulose-5-P. May be involved in the utilization of 2,3- diketo-L-gulonate	sgbH	TRUE	FALSE	COG0269@2|Bacteria,COG0269@1|root,3XMQG@561|Escherichia,1RRCI@1236|Gammaproteobacteria,1QWE4@1224|Proteobacteria			G
GUT_GENOME005360_01215	481.622	Catalyzes the conversion of D-ribulose 5-phosphate to formate and 3,4-dihydroxy-2-butanone 4-phosphate	ribB	FALSE	TRUE	COG0108@2|Bacteria,COG0108@1|root,3XMEU@561|Escherichia,1RQ49@1236|Gammaproteobacteria,1MU8P@1224|Proteobacteria	872		H	0	1
GUT_GENOME005360_02553	521.918	Putative bacterial toxin ydaT		FALSE	TRUE	1RBQ0@1224|Proteobacteria,3XPJD@561|Escherichia,2ZMCI@2|Bacteria,28ZM9@1|root,1S2C7@1236|Gammaproteobacteria	256			0	1
GUT_GENOME005360_02556	294.326			FALSE	TRUE	1NG7D@1224|Proteobacteria,1SE2F@1236|Gammaproteobacteria,2EAS2@1|root,334U5@2|Bacteria	261			0	1
GUT_GENOME005437_00646	237	ADP-glyceromanno-heptose 6-epimerase activity		TRUE	FALSE	COG0451@2|Bacteria,COG0451@1|root,1SFKC@1236|Gammaproteobacteria,1N9IQ@1224|Proteobacteria	2643		G,M	1	0.857143
GUT_GENOME005437_02216	201	The phosphoenolpyruvate-dependent sugar phosphotransferase system (sugar PTS), a major carbohydrate active transport system, catalyzes the phosphorylation of incoming sugar substrates concomitantly with their translocation across the cell membrane. The enzyme II CmtAB PTS system is involved in D-mannitol transport	cmtB	TRUE	FALSE	COG1762@2|Bacteria,1RKSR@1224|Proteobacteria,1S6J2@1236|Gammaproteobacteria,3XPPH@561|Escherichia,COG1762@1|root			G,T
GUT_GENOME005437_04212	614.118			TRUE	FALSE
GUT_GENOME005440_04541	1566.76	Pyridine nucleotide-disulphide oxidoreductase, dimerisation domain	cdr	TRUE	TRUE	COG0607@1|root,3X4C3@547|Enterobacter,1T1WT@1236|Gammaproteobacteria,1NR3M@1224|Proteobacteria,COG0446@1|root,COG0446@2|Bacteria,COG0607@2|Bacteria	2135		I,P	1	1
GUT_GENOME005440_04580	974.378			TRUE	FALSE	33UGG@2|Bacteria,2F1FS@1|root,1NV7B@1224|Proteobacteria	76			1	0
GUT_GENOME005440_04588	1455.33	membrane protein of prophage CP-933X Escherichia coli O157 H7 EDL933		TRUE	FALSE	1QWXK@1224|Proteobacteria,1SJA4@1236|Gammaproteobacteria,COG3064@1|root,COG3064@2|Bacteria	28		M	0.333333	0
GUT_GENOME005444_00056	764.15	Transcriptional regulator		TRUE	FALSE	COG1414@1|root,1S5MK@1236|Gammaproteobacteria,1MUYT@1224|Proteobacteria,COG1414@2|Bacteria	941		K	0.942857	0.0285714
GUT_GENOME005444_00307	1991.31	extracellular polysaccharide metabolic process	yjbH	TRUE	TRUE	1RQKV@1236|Gammaproteobacteria,COG4775@2|Bacteria,1MX3H@1224|Proteobacteria,COG4775@1|root,3XMA1@561|Escherichia			M
GUT_GENOME005444_00347	858.227	Reduces 3-sulfolactaldehyde (SLA) to 2,3- dihydroxypropane 1-sulfonate (DHPS)	yihU	TRUE	FALSE	1RA7F@1224|Proteobacteria,COG2084@1|root,COG2084@2|Bacteria,1RMMY@1236|Gammaproteobacteria,3XMX8@561|Escherichia	2342		I	1	0
GUT_GENOME005444_00429	234	Protein of unknown function (DUF2756)	yhhA	TRUE	TRUE	2D4KK@1|root,1SAJI@1236|Gammaproteobacteria,1N0WI@1224|Proteobacteria,3XPS6@561|Escherichia,32THA@2|Bacteria
GUT_GENOME005444_00464	457.858	Belongs to the UPF0178 family	yaiI	TRUE	TRUE	1RCZA@1224|Proteobacteria,COG1671@2|Bacteria,COG1671@1|root,3XN72@561|Escherichia,1S3QM@1236|Gammaproteobacteria
GUT_GENOME005444_00676	457.709	Type IV leader peptidase family	outO	TRUE	TRUE	1RN90@1236|Gammaproteobacteria,COG1989@1|root,1MUZF@1224|Proteobacteria,COG1989@2|Bacteria,3XPSX@561|Escherichia	2512		N,O,U	1	1
GUT_GENOME005444_00802	692.646	rRNA (cytosine-N4-)-methyltransferase activity		TRUE	TRUE	COG0275@1|root			J
GUT_GENOME005444_01211	1073.5	L-seryl-tRNA selenium transferase		TRUE	FALSE	COG1921@1|root,3WXKG@544|Citrobacter,COG1921@2|Bacteria,1MWCB@1224|Proteobacteria,1RZF1@1236|Gammaproteobacteria	2356		E,J	1	0
GUT_GENOME005444_01756	763.221	Belongs to the metallo-dependent hydrolases superfamily. NagA family	agaA	TRUE	TRUE	COG1820@2|Bacteria,1MW8Y@1224|Proteobacteria,COG1820@1|root,1RMRV@1236|Gammaproteobacteria			G
GUT_GENOME005444_02228	1260.73	glutamate-1-semialdehyde 2,1-aminomutase activity	hemL	TRUE	TRUE	COG0001@2|Bacteria,1RM7N@1236|Gammaproteobacteria,COG0001@1|root,3XNJF@561|Escherichia,1MUY5@1224|Proteobacteria			H
GUT_GENOME005444_02311	1045.31	Part of the ABC transporter complex ModABC involved in molybdenum import. Responsible for energy coupling to the transport system	modC	TRUE	TRUE	1MU8K@1224|Proteobacteria,COG4148@1|root,COG4148@2|Bacteria,3XNBJ@561|Escherichia,1RQCV@1236|Gammaproteobacteria			P
GUT_GENOME005444_02808	771.706	repressor for the aga operon for N-acetyl galactosamine transport and metabolism	agaR	TRUE	TRUE	COG1349@2|Bacteria,1MUJT@1224|Proteobacteria,COG1349@1|root,1SZXU@1236|Gammaproteobacteria,3XPHU@561|Escherichia			G,K
GUT_GENOME005444_02810	281.186	Controls the transcription of genes involved in arginine and lysine metabolism	argP	TRUE	TRUE	1MWUP@1224|Proteobacteria,1RNIC@1236|Gammaproteobacteria,3XMCC@561|Escherichia,COG0583@1|root,COG0583@2|Bacteria			K
GUT_GENOME005444_03313	210			TRUE	FALSE
GUT_GENOME005512_03663	596.641	Phage tail protein (Tail_P2_I)	gpI	TRUE	FALSE	1RQRK@1236|Gammaproteobacteria,COG4385@1|root,COG4385@2|Bacteria,1NZST@1224|Proteobacteria,3XQQ5@561|Escherichia	1858		X	1	0
GUT_GENOME005588_02009	387.823	Multiple antibiotic resistance protein MarR	marR	TRUE	TRUE	1N7BV@1224|Proteobacteria,1S2AX@1236|Gammaproteobacteria,3XMZ4@561|Escherichia,COG1846@1|root,COG1846@2|Bacteria			K
GUT_GENOME005656_00773	2981.22	DNA polymerase III is a complex, multichain enzyme responsible for most of the replicative synthesis in bacteria. This DNA polymerase also exhibits 3' to 5' exonuclease activity. The alpha chain is the DNA polymerase	dnaE	TRUE	TRUE	COG0587@1|root,COG0587@2|Bacteria,1MUIF@1224|Proteobacteria,1RP0K@1236|Gammaproteobacteria,3XMAZ@561|Escherichia			L
GUT_GENOME005656_02393	1356.75	The phosphoenolpyruvate-dependent sugar phosphotransferase system (sugar PTS), a major carbohydrate active -transport system, catalyzes the phosphorylation of incoming sugar substrates concomitantly with their translocation across the cell membrane. This system is involved in arbutin, cellobiose, and salicin transport	ascF	TRUE	TRUE	1RNEG@1236|Gammaproteobacteria,COG1263@2|Bacteria,COG1263@1|root,COG1264@1|root,COG1264@2|Bacteria,1MXEG@1224|Proteobacteria,3XP49@561|Escherichia	2604		G	1	1
GUT_GENOME005656_03383	380.946	YbgS-like protein	ybgS	TRUE	TRUE	1S3VK@1236|Gammaproteobacteria,2AAK7@1|root,30ZXQ@2|Bacteria,3XPZF@561|Escherichia,1REV6@1224|Proteobacteria
GUT_GENOME005656_03881	537	transmembrane transport	yhhJ	FALSE	TRUE	1MUIA@1224|Proteobacteria,COG0842@2|Bacteria,COG0842@1|root,1RQSE@1236|Gammaproteobacteria,3XNX5@561|Escherichia	2072		V	0	1
GUT_GENOME005656_03900	456	belongs to the carbohydrate kinase PfkB family	hldE	TRUE	TRUE	COG2870@2|Bacteria,COG2870@1|root,COG0615@2|Bacteria,COG0615@1|root,3XM6T@561|Escherichia,1RMAJ@1236|Gammaproteobacteria,1MV3Z@1224|Proteobacteria	1952		F,M	1	1
GUT_GENOME005663_00196	1222.74	Belongs to the N-acetylmuramoyl-L-alanine amidase 3 family	amiC	TRUE	TRUE	1RMP1@1236|Gammaproteobacteria,1MUQK@1224|Proteobacteria,COG0860@2|Bacteria,COG0860@1|root,3XNFF@561|Escherichia			M
GUT_GENOME005663_00209	591.647	Part of the yadCKLM-htrE-yadVN fimbrial operon. Could contribute to adhesion to various surfaces in specific environmental niches	yadK	TRUE	FALSE	1NZBZ@1224|Proteobacteria,1SQYM@1236|Gammaproteobacteria,COG3539@1|root,COG3539@2|Bacteria,3XR5S@561|Escherichia	964		N,U	1	0
GUT_GENOME005663_00812	427.847	This protein is one of the early assembly proteins of the 50S ribosomal subunit, although it is not seen to bind rRNA by itself. It is important during the early stages of 50S assembly	rplM	TRUE	TRUE	1S280@1236|Gammaproteobacteria,1RA11@1224|Proteobacteria,COG0102@2|Bacteria,COG0102@1|root,3X0FV@547|Enterobacter	1975		J	1	1
GUT_GENOME005663_01086	491.507	positive regulation of phosphorylation	ptsN	TRUE	TRUE	1S668@1236|Gammaproteobacteria,COG1762@2|Bacteria,COG1762@1|root,1RD0E@1224|Proteobacteria,3XNYP@561|Escherichia			G,T
GUT_GENOME005663_01434	463.8	Necessary for efficient RNA polymerase transcription elongation past template-encoded arresting sites. The arresting sites in DNA have the property of trapping a certain fraction of elongating RNA polymerases that pass through, resulting in locked ternary complexes. Cleavage of the nascent transcript by cleavage factors such as GreA or GreB allows the resumption of elongation from the new 3'termi…	greB	TRUE	TRUE	COG0782@2|Bacteria,COG0782@1|root,3XP87@561|Escherichia,1S40Q@1236|Gammaproteobacteria,1RAP0@1224|Proteobacteria			K
GUT_GENOME005663_01939	1174.32	L-aspartate:2-oxoglutarate aminotransferase activity	aspC	TRUE	TRUE	1MUT0@1224|Proteobacteria,1RN02@1236|Gammaproteobacteria,COG1448@1|root,COG1448@2|Bacteria,3XNR8@561|Escherichia			E
GUT_GENOME005663_02075	718.07	Member of the two-component regulatory system BaeS BaeR which responds to envelope stress. Activates expression of periplasmic chaperone spy in response to spheroplast formation, indole and P pili protein PapG overexpression. Activates the mdtABCD and probably the CRISPR-Cas casABCDE-ygbT-ygbF operon	baeR	TRUE	TRUE	1MVCB@1224|Proteobacteria,1RMD0@1236|Gammaproteobacteria,COG0745@2|Bacteria,COG0745@1|root,3XMHX@561|Escherichia	1996		K,T	1	1
GUT_GENOME005663_02193	347.55	Type II secretion system pilotin lipoprotein (PulS_OutS)	yacC	TRUE	TRUE	2B1X9@1|root,1RH3T@1224|Proteobacteria,1S639@1236|Gammaproteobacteria,31UDJ@2|Bacteria,3XPRS@561|Escherichia
GUT_GENOME005704_01031	1219.69	system transmembrane protein lolE	lolE	TRUE	TRUE	1RMP9@1236|Gammaproteobacteria,1MVV7@1224|Proteobacteria,COG4591@2|Bacteria,COG4591@1|root,3XNMR@561|Escherichia			M
GUT_GENOME005704_01469	1213.87	electron transfer flavoprotein-quinone oxidoreductase ydiS	ydiS	TRUE	TRUE	COG0644@2|Bacteria,1RNY5@1236|Gammaproteobacteria,1MVU6@1224|Proteobacteria,COG0644@1|root,3XNRE@561|Escherichia			C
GUT_GENOME005704_01824	344.803	Protein of unknown function (DUF2002)	ygaC	TRUE	TRUE	1REJU@1224|Proteobacteria,3XPQW@561|Escherichia,2ZQRR@2|Bacteria,2DF7E@1|root,1S4HA@1236|Gammaproteobacteria
GUT_GENOME005704_02225	888.63	peroxidase activity	yfeX	TRUE	TRUE	1MWDD@1224|Proteobacteria,1RMZJ@1236|Gammaproteobacteria,COG2837@1|root,COG2837@2|Bacteria,3XM48@561|Escherichia			P
GUT_GENOME005704_03487	1195.64	sulfuric ester hydrolase activity	ydeN	TRUE	TRUE	COG3119@1|root,1MV92@1224|Proteobacteria,COG3119@2|Bacteria,1RPM3@1236|Gammaproteobacteria,3XNAG@561|Escherichia			P
GUT_GENOME005728_03908	538.85			FALSE	TRUE	3XRET@561|Escherichia,31KYN@2|Bacteria,2AV7Z@1|root,1TGP7@1236|Gammaproteobacteria,1QITM@1224|Proteobacteria	1113			0	1
GUT_GENOME005730_04129	785.373			TRUE	FALSE	1TGCI@1236|Gammaproteobacteria,31KN7@2|Bacteria,1QIHW@1224|Proteobacteria,3W1WG@53335|Pantoea,2AUYP@1|root	1575			0.911111	0.0222222
GUT_GENOME005809_00632	1454.15	VWA domain containing CoxE-like protein		TRUE	TRUE
GUT_GENOME005809_00808	2027	beta-maltose 4-alpha-glucanotransferase activity	malQ	TRUE	TRUE	COG1640@2|Bacteria,COG1640@1|root,1RMJW@1236|Gammaproteobacteria,1QTVJ@1224|Proteobacteria,3XP9K@561|Escherichia			G
GUT_GENOME005809_01063	1092.06	DNA ligase that catalyzes the formation of phosphodiester linkages between 5'-phosphoryl and 3'-hydroxyl groups in double-stranded DNA using NAD as a coenzyme and as the energy source for the reaction. It is essential for DNA replication and repair of damaged DNA	ligA	TRUE	TRUE	COG0272@1|root,3XMQY@561|Escherichia,1RPAV@1236|Gammaproteobacteria,1MV3R@1224|Proteobacteria,COG0272@2|Bacteria			L
GUT_GENOME005809_01122	586.385	transferase activity, transferring glycosyl groups		TRUE	FALSE	4QQWE@28883|Caudovirales,4QEAQ@10239|Viruses,4QVWS@35237|dsDNA viruses no RNA stage	1575			0.911111	0.0222222
GUT_GENOME005809_01422	1256.07	Cell division protein DamX	damX	TRUE	TRUE	1Q1YI@1224|Proteobacteria,COG3266@2|Bacteria,COG3266@1|root,1RRJF@1236|Gammaproteobacteria,3XMJJ@561|Escherichia			D
GUT_GENOME005809_02415	637.405	Part of the translocation and assembly module (TAM) autotransporter assembly complex, which functions in translocation of autotransporters across the outer membrane. In reconstituted TAM this subunit (Ag43, AC P39180) is not necessary for substrate penetration in the outer membrane. Substrate binding to TamA moves its POTRA domains about 30 Angstroms into the periplasm, which would deform either …	ytfN	FALSE	TRUE	COG2911@1|root,COG2911@2|Bacteria,1RMMF@1236|Gammaproteobacteria,1MUVD@1224|Proteobacteria,3XPEG@561|Escherichia	359		U	0	1
GUT_GENOME005809_02543	537.357	Lipoamide dehydrogenase is a component of the glycine cleavage system as well as of the alpha-ketoacid dehydrogenase complexes	lpdA	TRUE	FALSE	COG1249@2|Bacteria,COG1249@1|root,1RMFF@1236|Gammaproteobacteria,1MU2U@1224|Proteobacteria,3XM8F@561|Escherichia	1184		C,F	1	0
GUT_GENOME005809_02654	646.72	Catalyzes the reversible transfer of the terminal phosphate group between ATP and AMP. Plays an important role in cellular energy homeostasis and in adenine nucleotide metabolism	adk	TRUE	TRUE	1MXCZ@1224|Proteobacteria,1RMT6@1236|Gammaproteobacteria,3XP7G@561|Escherichia,COG0563@1|root,COG0563@2|Bacteria			F
GUT_GENOME005809_02813	243	this blockage is overcome by subsequent expression of antitoxin HigA. Overexpression causes cleavage of a number of mRNAs in a translation-dependent fashion, suggesting this is an mRNA interferase. mRNA interferases play a role in bacterial persistence to antibiotics	higB	TRUE	TRUE	COG4680@2|Bacteria,COG4680@1|root,3XRAB@561|Escherichia,1S932@1236|Gammaproteobacteria,1N1N1@1224|Proteobacteria	1901		J,V	1	1
GUT_GENOME005809_03065	430.092	response to hydroperoxide	osmC	TRUE	TRUE	1RH9U@1224|Proteobacteria,COG1764@2|Bacteria,COG1764@1|root,3XPCN@561|Escherichia,1S205@1236|Gammaproteobacteria			O,V
GUT_GENOME005883_01846	380.931	Catalyzes the pyruvoyl-dependent decarboxylation of aspartate to produce beta-alanine	panD	TRUE	FALSE	1RI1B@1224|Proteobacteria,1S66E@1236|Gammaproteobacteria,COG0853@2|Bacteria,COG0853@1|root,3XPIJ@561|Escherichia	1148		H	1	0
GUT_GENOME005883_03975	427.558			TRUE	FALSE	4QIPB@10662|Myoviridae,4QBVZ@10239|Viruses,4QSM0@28883|Caudovirales	670			1	0.5
GUT_GENOME005916_00613	415.785	Structural component of flagellum, the bacterial motility apparatus. Part of the rod structure of flagellar basal body	flgB	TRUE	TRUE	3XPMJ@561|Escherichia,COG1815@2|Bacteria,COG1815@1|root,1S9DS@1236|Gammaproteobacteria,1MZ8P@1224|Proteobacteria			N
GUT_GENOME005916_01873	355.297	response to oxidative stress	yidH	TRUE	TRUE	1RJVC@1224|Proteobacteria,1S5YN@1236|Gammaproteobacteria,2ATH5@1|root,3XPVT@561|Escherichia,31J0W@2|Bacteria
GUT_GENOME005916_02503	1626.44			TRUE	TRUE	33TFT@2|Bacteria,2F0CN@1|root,1SMRZ@1236|Gammaproteobacteria,1NU66@1224|Proteobacteria	1459			0.958333	1
GUT_GENOME005916_02721	690.614	An essential GTPase which binds GTP, GDP and possibly (p)ppGpp with moderate affinity, with high nucleotide exchange rates and a fairly low GTP hydrolysis rate. Plays a role in control of the cell cycle, stress response, ribosome biogenesis and in those bacteria that undergo differentiation, in morphogenesis control	obg	TRUE	TRUE	1MUGZ@1224|Proteobacteria,1RMFQ@1236|Gammaproteobacteria,3XNNJ@561|Escherichia,COG0536@1|root,COG0536@2|Bacteria	1193		D,L	1	1
GUT_GENOME005922_00347	804.506	COG4886 Leucine-rich repeat (LRR) protein	yopM	FALSE	TRUE	1NF73@1224|Proteobacteria,COG4886@2|Bacteria,COG4886@1|root,1RXVA@1236|Gammaproteobacteria	1443		K	0	1
GUT_GENOME005922_01098	213.973	Transposase		TRUE	FALSE	COG2963@2|Bacteria,COG2963@1|root	793		L,X	0.05	0
GUT_GENOME005935_00599	753.518	Catalyzes the formation of dTDP-glucose, from dTTP and glucose 1-phosphate, as well as its pyrophosphorolysis	rffH	TRUE	TRUE	COG0454@1|root,COG0456@2|Bacteria,3XNBF@561|Escherichia,1PHCJ@1224|Proteobacteria,1RYNF@1236|Gammaproteobacteria			J,K,R
GUT_GENOME005935_01024	1248.31	Involved in the glycolate utilization. Catalyzes the condensation and subsequent hydrolysis of acetyl-coenzyme A (acetyl-CoA) and glyoxylate to form malate and CoA	glcB	TRUE	TRUE	COG2225@2|Bacteria,1MVEV@1224|Proteobacteria,1RPVI@1236|Gammaproteobacteria,COG2225@1|root	129		C	0.615385	1
GUT_GENOME005935_02787	1415.68	Synthesizes alpha-1,4-glucan chains using ADP-glucose	glgA	TRUE	TRUE	1RNMP@1236|Gammaproteobacteria,1MUGM@1224|Proteobacteria,COG0297@2|Bacteria,COG0297@1|root,3XP2P@561|Escherichia			F,G
GUT_GENOME005935_02952	937.751	Part of an ATP-dependent transport system LolCDE responsible for the release of lipoproteins targeted to the outer membrane from the inner membrane. Such a release is dependent of the sorting-signal (absence of an Asp at position 2 of the mature lipoprotein) and of LolA	lolC	TRUE	TRUE	COG4591@1|root,1RMP9@1236|Gammaproteobacteria,1MVV7@1224|Proteobacteria,COG4591@2|Bacteria			M
GUT_GENOME005935_03479	338.395	response to osmotic stress	osmE	TRUE	TRUE	COG2913@2|Bacteria,COG2913@1|root,1RD8V@1224|Proteobacteria,1S48R@1236|Gammaproteobacteria,3XPRB@561|Escherichia			M
GUT_GENOME005968_01050	730.155	Belongs to the UPF0271 (lamB) family	ybgL	TRUE	TRUE	1MUYV@1224|Proteobacteria,1RSCZ@1236|Gammaproteobacteria,COG1540@1|root,COG1540@2|Bacteria,3XNRV@561|Escherichia			E
GUT_GENOME005968_01542	450	Modulates the polysaccharide chain length of enterobacterial common antigen (ECA)	wzzE	FALSE	TRUE	COG3765@1|root,COG3765@2|Bacteria,3XNGX@561|Escherichia,1RRBS@1236|Gammaproteobacteria,1MW70@1224|Proteobacteria			M
GUT_GENOME005968_02632	276	aspartate--ammonia ligase	asnA	TRUE	TRUE	COG2502@2|Bacteria,COG2502@1|root,3XNFG@561|Escherichia,1RN79@1236|Gammaproteobacteria,1MVWF@1224|Proteobacteria			E,F
GUT_GENOME005968_03421	1119.53	FlhB HrpN YscU SpaS Family	flhB	TRUE	TRUE	1MUWI@1224|Proteobacteria,3XQQK@561|Escherichia,COG1377@2|Bacteria,1RMHA@1236|Gammaproteobacteria,COG1377@1|root	2397		N	0.970588	1
GUT_GENOME005968_03547	363.212	Responsible for synthesis of pseudouridine from uracil- 516 in 16S ribosomal RNA	rsuA	TRUE	TRUE	1RQA9@1236|Gammaproteobacteria,COG1187@2|Bacteria,COG1187@1|root,3XNTC@561|Escherichia,1MU6M@1224|Proteobacteria	1877		J	1	1
GUT_GENOME006031_01821	1046.1	Dihydroxyacetone binding subunit of the dihydroxyacetone kinase, which is responsible for the phosphoenolpyruvate (PEP)- dependent phosphorylation of dihydroxyacetone via a phosphoryl group transfer from DhaL-ATP. Binds covalently dihydroxyacetone in hemiaminal linkage. DhaK acts also as corepressor of the transcription activator DhaR by binding to the sensor domain of DhaR. In the presence of di…	dhaK	TRUE	TRUE	COG2376@2|Bacteria,1MVSR@1224|Proteobacteria,COG2376@1|root,1RNRQ@1236|Gammaproteobacteria,3XP0J@561|Escherichia			G
GUT_GENOME006045_02439	1127.36	Protein of unknown function (DUF418)	yeiB	TRUE	TRUE	COG2311@2|Bacteria,1RQ08@1236|Gammaproteobacteria,1MWHW@1224|Proteobacteria,COG2311@1|root,3XMAP@561|Escherichia
GUT_GENOME006045_02676	691.32	Part of a membrane complex involved in electron transport. Required to maintain the reduced state of SoxR	rnfE	TRUE	TRUE	COG4660@2|Bacteria,1MW6N@1224|Proteobacteria,1RMEH@1236|Gammaproteobacteria,COG4660@1|root,3XN79@561|Escherichia			C
GUT_GENOME006045_03005	1258.99	AMP-binding enzyme	JD73_00810	FALSE	TRUE	COG0318@1|root,1T1II@1236|Gammaproteobacteria,COG0318@2|Bacteria,1MU6G@1224|Proteobacteria,3XP2C@561|Escherichia	131		I,Q	0	1
GUT_GENOME006078_00831	1352.37	ATP binding	ycjX	TRUE	TRUE	COG3106@2|Bacteria,1RQ05@1236|Gammaproteobacteria,1MX6E@1224|Proteobacteria,COG3106@1|root,3XMK8@561|Escherichia			T
GUT_GENOME006078_00946	917.809	Belongs to the aspartate-semialdehyde dehydrogenase family	usg	TRUE	TRUE	COG0136@1|root,COG0136@2|Bacteria,1RNB6@1236|Gammaproteobacteria,1MUHG@1224|Proteobacteria,3XM6M@561|Escherichia			E
GUT_GENOME006078_00965	2836.83	Belongs to the resistance-nodulation-cell division (RND) (TC 2.A.6) family	cusA	TRUE	TRUE	COG3696@1|root,COG3696@2|Bacteria,1SP6I@1236|Gammaproteobacteria,1NUIV@1224|Proteobacteria,3XP8C@561|Escherichia			P
GUT_GENOME006078_03324	688.647	Bacterial periplasmic substrate-binding proteins		TRUE	TRUE	1RPY2@1236|Gammaproteobacteria,1NH6Q@1224|Proteobacteria,COG4215@2|Bacteria,COG4215@1|root,3XN8E@561|Escherichia			E,P
GUT_GENOME006078_04066	990.161	Part of the binding-protein-dependent transport system for citrate-dependent Fe(3 ). Probably responsible for the translocation of the substrate across the membrane	fecC	TRUE	TRUE	COG0609@1|root,1RP2K@1236|Gammaproteobacteria,COG0609@2|Bacteria,1R87A@1224|Proteobacteria,3XRJT@561|Escherichia	1159		P	1	1
GUT_GENOME006211_00189	454.717	General secretion pathway protein	gspG	TRUE	TRUE	3XPD0@561|Escherichia,COG2165@1|root,1RDX2@1224|Proteobacteria,1S3VS@1236|Gammaproteobacteria,COG2165@2|Bacteria	123		N,U,W	1	1
GUT_GENOME006211_00683	498.077	Catalyzes the conversion of acetate into acetyl-CoA (AcCoA), an essential intermediate at the junction of anabolic and catabolic pathways. Acs undergoes a two-step reaction. In the first half reaction, Acs combines acetate with ATP to form acetyl- adenylate (AcAMP) intermediate. In the second half reaction, it can then transfer the acetyl group from AcAMP to the sulfhydryl group of CoA, forming t…	acsA	TRUE	TRUE	COG0365@1|root,COG0365@2|Bacteria,3XNZN@561|Escherichia,1RMNZ@1236|Gammaproteobacteria,1MUF5@1224|Proteobacteria	1956		F,I	1	1
GUT_GENOME006211_00729	862.685	Important for the colocalization of sister nascent DNA strands after replication fork passage during DNA replication, and for positioning and subsequent partitioning of sister chromosomes. Does not have GTPase activity on its own	yjdA	TRUE	TRUE	28MYC@1|root,3XRMT@561|Escherichia,2ZB58@2|Bacteria,1T18N@1236|Gammaproteobacteria,1PNJ3@1224|Proteobacteria
GUT_GENOME006211_04238	650.737	von Willebrand factor type A domain	yegL	TRUE	TRUE	COG4245@2|Bacteria,COG4245@1|root,1MVUE@1224|Proteobacteria,1RZUX@1236|Gammaproteobacteria,3XQ97@561|Escherichia
GUT_GENOME006229_00020	817.11	Belongs to the transferase hexapeptide repeat family	dapD	TRUE	TRUE	1MU0Y@1224|Proteobacteria,1RPCS@1236|Gammaproteobacteria,COG2171@1|root,COG2171@2|Bacteria,3XMBZ@561|Escherichia			E
GUT_GENOME006229_03548	238.714	Belongs to the UPF0229 family	yeaH	TRUE	TRUE	COG2718@1|root,COG2718@2|Bacteria,3XPFD@561|Escherichia,1MWQM@1224|Proteobacteria,1RQWC@1236|Gammaproteobacteria	1932		R	1	1
GUT_GENOME006229_03678	766.609	alcohol dehydrogenase (NADP+) activity	ybbO	TRUE	TRUE	1T1HV@1236|Gammaproteobacteria,COG0300@2|Bacteria,COG0300@1|root,3XPHF@561|Escherichia,1RGKZ@1224|Proteobacteria			R
GUT_GENOME006229_03975	268.275	Transports L-lactate across the membrane. Can also transport D-lactate and glycolate. Seems to be driven by a proton motive force	lldP	TRUE	TRUE	1RPNW@1236|Gammaproteobacteria,3XNWT@561|Escherichia,COG1620@1|root,COG1620@2|Bacteria,1MV13@1224|Proteobacteria			C
GUT_GENOME006321_01393	636.447	Protease that can cleave T7 RNA polymerase, ferric enterobactin receptor protein (FEP), antimicrobial peptide protamine and other proteins. This protease has a specificity for paired basic residues	ompT	TRUE	FALSE	COG4571@2|Bacteria,COG4571@1|root,1RRNQ@1236|Gammaproteobacteria,1MWE3@1224|Proteobacteria,3XQQH@561|Escherichia	778		M	1	0
GUT_GENOME006417_00283	1272.54	Responsible for the transport of dicarboxylates such as succinate, fumarate, and malate across the membrane	dctA	TRUE	TRUE	COG1301@1|root,1RMEN@1236|Gammaproteobacteria,1MU0Q@1224|Proteobacteria,COG1301@2|Bacteria,3XNK8@561|Escherichia			C
GUT_GENOME006417_02916	985.483	symporter activity	yfeH	TRUE	TRUE	1RN2S@1236|Gammaproteobacteria,3XM62@561|Escherichia,COG0385@1|root,COG0385@2|Bacteria,1MUMM@1224|Proteobacteria			R
GUT_GENOME006417_03959	291	Putative transposase of IS4/5 family (DUF4096)		FALSE	TRUE	4IFNT@91061|Bacilli,3F6RW@33958|Lactobacillaceae,1U5ZT@1239|Firmicutes,COG3293@1|root,COG3293@2|Bacteria			L,X
GUT_GENOME006465_02118	1184.93	Catalyzes the NADP-dependent rearrangement and reduction of 1-deoxy-D-xylulose-5-phosphate (DXP) to 2-C-methyl-D-erythritol 4-phosphate (MEP)	dxr	TRUE	TRUE	COG0743@1|root,COG0743@2|Bacteria,1RNNW@1236|Gammaproteobacteria,1MU4G@1224|Proteobacteria,3XNDF@561|Escherichia			I
GUT_GENOME006465_02841	1435.91	AIR synthase related protein, N-terminal domain		TRUE	TRUE	COG0550@1|root,COG0709@1|root			E,L
GUT_GENOME006465_03551	864.549	Part of the ABC transporter complex CysAWTP (TC 3.A.1.6.1) involved in sulfate thiosulfate import. Probably responsible for the translocation of the substrate across the membrane	cysW	TRUE	TRUE	1RNZK@1236|Gammaproteobacteria,COG4208@2|Bacteria,COG4208@1|root,1MV8X@1224|Proteobacteria,3XN3S@561|Escherichia			P
GUT_GENOME006465_03693	635.244	Part of the high-affinity ATP-driven potassium transport (or Kdp) system, which catalyzes the hydrolysis of ATP coupled with the electrogenic transport of potassium into the cytoplasm. This subunit is responsible for energy coupling to the transport system	kdpB	FALSE	TRUE	COG2216@2|Bacteria,3XMHA@561|Escherichia,1RPPF@1236|Gammaproteobacteria,1MU7D@1224|Proteobacteria,COG2216@1|root	107		P	0	1
GUT_GENOME006474_00545	678.94	Site-specific DNA-methyltransferase (Adenine-specific)		TRUE	FALSE	1P85S@1224|Proteobacteria,1RMNW@1236|Gammaproteobacteria,COG0338@1|root,COG0338@2|Bacteria	1753		L	1	0
GUT_GENOME006561_03747	381.115	Protein of unknown function (DUF533)	yebE	TRUE	TRUE	COG2979@2|Bacteria,COG2979@1|root,1R95E@1224|Proteobacteria,1T0I8@1236|Gammaproteobacteria,3XRFE@561|Escherichia
GUT_GENOME006561_04266	343.074	transcriptional regulator	bigR	TRUE	TRUE	1SCH5@1236|Gammaproteobacteria,COG0640@1|root,1N72Q@1224|Proteobacteria,COG0640@2|Bacteria	2135		K	1	1
GUT_GENOME006689_02835	773.21	PTS system mannitol-specific	mtlA	TRUE	TRUE	COG2213@2|Bacteria,1RNAG@1236|Gammaproteobacteria,1MUPU@1224|Proteobacteria,COG4668@2|Bacteria,COG2213@1|root,COG4668@1|root,3XME2@561|Escherichia	1197		G	1	1
GUT_GENOME006706_00152	394.313	Belongs to the UPF0102 family	yraN	TRUE	TRUE	COG0792@1|root,3XPNC@561|Escherichia,1SC8A@1236|Gammaproteobacteria,COG0792@2|Bacteria,1N6VN@1224|Proteobacteria			L
GUT_GENOME006706_03998	1335.21	Belongs to the dicarboxylate amino acid cation symporter (DAACS) (TC 2.A.23) family	ydjN	TRUE	TRUE	1R3F8@1224|Proteobacteria,1RMHV@1236|Gammaproteobacteria,COG1823@1|root,COG1823@2|Bacteria,3XNSQ@561|Escherichia			E,U
GUT_GENOME006783_04097	1199.46	Integrase is necessary for integration of the phage into the host genome by site-specific recombination. In conjunction with excisionase, integrase is also necessary for excision of the prophage from the host genome (By similarity)	intR	TRUE	TRUE	COG0582@1|root,COG0582@2|Bacteria,3XM9F@561|Escherichia,1RP4Y@1236|Gammaproteobacteria,1MVZB@1224|Proteobacteria	2650		L,X	1	1
GUT_GENOME006833_03234	865.682	Catalyzes the prenylation of para-hydroxybenzoate (PHB) with an all-trans polyprenyl group. Mediates the second step in the final reaction sequence of ubiquinone-8 (UQ-8) biosynthesis, which is the condensation of the polyisoprenoid side chain with PHB, generating the first membrane-bound Q intermediate 3- octaprenyl-4-hydroxybenzoate	ubiA	TRUE	TRUE	COG0382@1|root,1RMZ1@1236|Gammaproteobacteria,COG0382@2|Bacteria,1MV4Q@1224|Proteobacteria,3XNZT@561|Escherichia			H
GUT_GENOME006833_03896	602.614	N-terminal domain of M60-like peptidases	acfD	FALSE	TRUE	COG3064@2|Bacteria,COG3064@1|root,3XN17@561|Escherichia,1RYM4@1236|Gammaproteobacteria,1N5U6@1224|Proteobacteria	2134		M	0	1
GUT_GENOME006833_04092	766.508	The physiological role of BioH is to remove the methyl group introduced by BioC when the pimeloyl moiety is complete. It allows to synthesize pimeloyl-ACP via the fatty acid synthetic pathway through the hydrolysis of the ester bonds of pimeloyl-ACP esters	bioH	TRUE	TRUE	1QUBR@1224|Proteobacteria,1RSF9@1236|Gammaproteobacteria,COG0596@1|root,COG0596@2|Bacteria			H,R
GUT_GENOME006847_01555	1808.66	DNA polymerase III is a complex, multichain enzyme responsible for most of the replicative synthesis in bacteria. This DNA polymerase also exhibits	dnaX	TRUE	TRUE	1RMIA@1236|Gammaproteobacteria,COG2812@1|root,COG2812@2|Bacteria,1MVCK@1224|Proteobacteria,3XNC3@561|Escherichia			F,L
GUT_GENOME006847_03357	248.863	Phosphopantetheine attachment site	AKN40_0794	FALSE	TRUE	COG0236@1|root,COG0236@2|Bacteria,1NHQD@1224|Proteobacteria,1SA25@1236|Gammaproteobacteria,3XR5J@561|Escherichia	129		I,Q	0.615385	1
GUT_GENOME006902_00227	1471.61	metallopeptidase activity	yhjJ	TRUE	TRUE	1RNKC@1236|Gammaproteobacteria,COG0612@2|Bacteria,COG0612@1|root,1NAH6@1224|Proteobacteria,3XN4Q@561|Escherichia			R
GUT_GENOME006918_02601	228			TRUE	TRUE	2AUW7@1|root,1TG9A@1236|Gammaproteobacteria,1QIEX@1224|Proteobacteria,31KJN@2|Bacteria,3XQ59@561|Escherichia	2009			1	1
GUT_GENOME006918_02682	1521.67	Belongs to the glutamate--cysteine ligase type 1 family. Type 1 subfamily	gshA	TRUE	TRUE	COG2918@2|Bacteria,3XNK6@561|Escherichia,1RPNQ@1236|Gammaproteobacteria,COG2918@1|root,1MW9B@1224|Proteobacteria			H
GUT_GENOME006918_02912	477.308	Catalyzes the N-acetylation of L-phenylalanine and L- methionine using acetyl-CoA as acetyl donor in vitro. Cannot accept L-tyrosine as substrate and propionyl-CoA, succinyl-CoA or (S)-methylmalonyl-CoA as acyl donors. Is also able to acetylate and thus detoxify several nonhydrolyzable aminoacyl adenylates, but not the processed form of the peptide- nucleotide antibiotic microcin C (McC). When ov…	yhhY	TRUE	TRUE	COG1247@1|root,COG1247@2|Bacteria,1QUGY@1224|Proteobacteria,1T1YJ@1236|Gammaproteobacteria,3XP7U@561|Escherichia			E,M
GUT_GENOME006918_03551	696.214	arylsulfatase activity	aslA	FALSE	TRUE	COG3119@2|Bacteria,1MUJH@1224|Proteobacteria,1RN2V@1236|Gammaproteobacteria,3XPCB@561|Escherichia,COG3119@1|root	883		P	0.5	1
GUT_GENOME006918_03608	356.969			FALSE	TRUE	1NDBD@1224|Proteobacteria,1SNMD@1236|Gammaproteobacteria,2E33Z@1|root,32Y42@2|Bacteria	1283			0	1
GUT_GENOME007046_00682	1817.57	Catalyzes the conversion of acetate into acetyl-CoA (AcCoA), an essential intermediate at the junction of anabolic and catabolic pathways. Acs undergoes a two-step reaction. In the first half reaction, Acs combines acetate with ATP to form acetyl- adenylate (AcAMP) intermediate. In the second half reaction, it can then transfer the acetyl group from AcAMP to the sulfhydryl group of CoA, forming t…	acsA	TRUE	TRUE	1MUF5@1224|Proteobacteria,1RMNZ@1236|Gammaproteobacteria,COG0365@2|Bacteria,COG0365@1|root,3XNZN@561|Escherichia			F,I
GUT_GENOME007046_01527	669			TRUE	FALSE	405C2@613|Serratia,3420V@2|Bacteria,2BYSC@1|root,1SR2Z@1236|Gammaproteobacteria,1NYCS@1224|Proteobacteria
GUT_GENOME007046_03107	276.429			TRUE	TRUE		2648			1	1
GUT_GENOME007046_03928	454.5	Recombination protein BET	bet	FALSE	TRUE	COG3723@2|Bacteria,1QWBR@1224|Proteobacteria,1T2T2@1236|Gammaproteobacteria,COG3723@1|root	247		L	0	1
GUT_GENOME007112_00391	845.915	YjeJ-like	yjeJ	TRUE	TRUE	1S0I0@1236|Gammaproteobacteria,28ICE@1|root,3XNQ3@561|Escherichia,2Z8ET@2|Bacteria,1MWNU@1224|Proteobacteria
GUT_GENOME007112_00985	290.46	immunity protein		TRUE	FALSE	2EAVP@1|root,1N1GF@1224|Proteobacteria,334X2@2|Bacteria,1SBRU@1236|Gammaproteobacteria	927			0.0806452	0.016129
GUT_GENOME007112_01244	1131.16	Aminotransferase class-V		TRUE	TRUE	COG0520@2|Bacteria,COG0520@1|root,3XMA9@561|Escherichia,1RNIY@1236|Gammaproteobacteria,1MUPD@1224|Proteobacteria	1979		E,H	1	1
GUT_GENOME007112_01436	481.737	Phosphonate C-P lyase system protein PhnG	phnG	TRUE	TRUE	1MZTZ@1224|Proteobacteria,COG3624@1|root,1S3FT@1236|Gammaproteobacteria,COG3624@2|Bacteria	1223		P	1	1
GUT_GENOME007112_01688	1519.73	Maltoporin periplasmic N-terminal extension	bglH	TRUE	FALSE	1PNS3@1224|Proteobacteria,1RQTQ@1236|Gammaproteobacteria,3XQB8@561|Escherichia,COG4580@1|root,COG4580@2|Bacteria	306		G	1	0
GUT_GENOME007112_01697	2418.82	Belongs to the class-I aminoacyl-tRNA synthetase family	leuS	TRUE	TRUE	COG0495@1|root,1RP14@1236|Gammaproteobacteria,1MV47@1224|Proteobacteria,COG0495@2|Bacteria,3XMA7@561|Escherichia			J
GUT_GENOME007112_02070	1603.94	Responsible for the aerobic transport of succinate from the periplasm to the cytoplasm at acidic pH. Can transport other C4-dicarboxylic acids such as aspartate and fumarate. May also play a role in the regulation of C4-dicarboxylic acid metabolism at pH 7, via regulation of expression and or activity of DctA. May act as a co-sensor of DcuS	ychM	TRUE	TRUE	1RMCN@1236|Gammaproteobacteria,COG0659@2|Bacteria,COG0659@1|root,1MVWV@1224|Proteobacteria,3XMAJ@561|Escherichia			P
GUT_GENOME007112_02699	238.667	acyl-CoA hydrolase activity	tesC	TRUE	TRUE	COG0824@1|root,COG0824@2|Bacteria,1S40Z@1236|Gammaproteobacteria,1REIH@1224|Proteobacteria,3WY9B@544|Citrobacter	1967		I	1	1
GUT_GENOME007112_02814	953.191	Catalyzes the NADH-dependent reduction of methylglyoxal (2-oxopropanal) in vitro. It is not known if this activity has physiological significance. Cannot use NADPH as a cosubstrate. Seems to play some role in intestinal colonization	ydjG	TRUE	TRUE	COG0667@2|Bacteria,1MVEH@1224|Proteobacteria,1RZSW@1236|Gammaproteobacteria,3XRJ3@561|Escherichia,COG0667@1|root	1128		C,H,R	1	1
GUT_GENOME007164_00413	1146.6	Phage late control gene D protein (GPD)		TRUE	TRUE	1RMKC@1236|Gammaproteobacteria,COG3500@2|Bacteria,1MXT8@1224|Proteobacteria,COG3500@1|root,3ZMH8@590|Salmonella	490		X	1	1
GUT_GENOME007164_00414	519.397	Type VI secretion system, phage-baseplate injector		TRUE	FALSE	1R639@1224|Proteobacteria,COG4540@2|Bacteria,COG4540@1|root,1RYQ7@1236|Gammaproteobacteria			X
GUT_GENOME007179_01373	1004.89	poly(3-hydroxybutyrate) depolymerase activity	yheT	TRUE	TRUE	1MWV1@1224|Proteobacteria,COG0429@2|Bacteria,COG0429@1|root,1RN39@1236|Gammaproteobacteria,3XMVG@561|Escherichia			R
GUT_GENOME007179_02243	210.078	PFAM Hok gef cell toxic protein		TRUE	TRUE	339QC@2|Bacteria,2EFY7@1|root,1SGKV@1236|Gammaproteobacteria,1NHNZ@1224|Proteobacteria
GUT_GENOME007179_02464	487.548			TRUE	TRUE	2ZEI5@2|Bacteria,1P5D4@1224|Proteobacteria,1SUQQ@1236|Gammaproteobacteria,28S6M@1|root
GUT_GENOME007179_03064	367.833	Catalyzes the dephosphorylation of an unusually broad range of substrate including deoxyribo- and ribonucleoside tri-, di-, and monophosphates, as well as polyphosphate and glucose-1-P (Glu1P)	nagD	FALSE	TRUE	1QGX4@1224|Proteobacteria,1RRS1@1236|Gammaproteobacteria,3XMSZ@561|Escherichia,COG0647@1|root,COG0647@2|Bacteria	1959		F,G	0.666667	1
GUT_GENOME007206_00351	872.722	Heat shock protein HtpX	htpX	TRUE	TRUE	COG0501@1|root,COG0501@2|Bacteria,1MUV4@1224|Proteobacteria,1RMN0@1236|Gammaproteobacteria,3XPBP@561|Escherichia			O
GUT_GENOME007206_01568	1259.7	Major component of the acid-resistance (AR) system allowing enteric pathogens to survive the acidic environment in the stomach	adiC	TRUE	TRUE	1RRKS@1236|Gammaproteobacteria,1MUA2@1224|Proteobacteria,COG0531@2|Bacteria,COG0531@1|root,3XNHB@561|Escherichia			E
GUT_GENOME007320_04311	646.726	Catalyzes the ATP-dependent biosynthesis of glutamine from glutamate and ammonia	glnA	FALSE	TRUE	COG0174@2|Bacteria,1MUGQ@1224|Proteobacteria,1RMD1@1236|Gammaproteobacteria,COG0174@1|root,3XMQ8@561|Escherichia	2021		E,F	0	1
GUT_GENOME007330_03209	432.03	Minor tail protein T	GJ12_01675	TRUE	TRUE	1SCN0@1236|Gammaproteobacteria,331YY@2|Bacteria,1NCN9@1224|Proteobacteria,2E7G2@1|root,3XQ4S@561|Escherichia	241			1	1
GUT_GENOME007330_03652	210.019			TRUE	TRUE
GUT_GENOME007406_02885	328.5	Rhomboid-type serine protease that catalyzes intramembrane proteolysis	glpG	TRUE	TRUE	3XMTF@561|Escherichia,1RN1K@1236|Gammaproteobacteria,1MYPM@1224|Proteobacteria,COG0705@2|Bacteria,COG0705@1|root			O
GUT_GENOME007406_03382	326.543			TRUE	TRUE	2ZE3N@2|Bacteria,28RR3@1|root,1P9VW@1224|Proteobacteria
GUT_GENOME007510_00231	2721	dEAD DEAH box helicase		FALSE	TRUE	COG1205@1|root,COG1201@2|Bacteria,COG1201@1|root,COG1205@2|Bacteria,1MVGH@1224|Proteobacteria,1RQXN@1236|Gammaproteobacteria			L
GUT_GENOME007510_00717	470.871	One of the primary rRNA binding proteins, it binds directly to 16S rRNA where it nucleates assembly of the head domain of the 30S subunit. Is located at the subunit interface close to the decoding center	rpsG	TRUE	TRUE	COG0049@1|root,1RN77@1236|Gammaproteobacteria,1MXC8@1224|Proteobacteria,COG0049@2|Bacteria,3XMJS@561|Escherichia			J
GUT_GENOME007510_00941	1115.65	The phosphoenolpyruvate-dependent sugar phosphotransferase system (sugar PTS), a major carbohydrate active transport system, catalyzes the phosphorylation of incoming sugar substrates concomitantly with their translocation across the cell membrane. The enzyme II FruAB PTS system is involved in fructose transport	fruB	TRUE	TRUE	COG4668@2|Bacteria,1MVP6@1224|Proteobacteria,COG4668@1|root,COG1925@2|Bacteria,COG1925@1|root,1RQP4@1236|Gammaproteobacteria,3XMPF@561|Escherichia			G,T
GUT_GENOME007510_01264	1415.93	Catalyzes the reversible phosphatidyl group transfer from one phosphatidylglycerol molecule to another to form cardiolipin (CL) (diphosphatidylglycerol) and glycerol	cls	TRUE	TRUE	COG1502@2|Bacteria,1MWUW@1224|Proteobacteria,1RPQG@1236|Gammaproteobacteria,COG1502@1|root,3XMEC@561|Escherichia			I
GUT_GENOME007510_01811	494.251	lrp mediates this effect for at least some of these operons. For example it is regulator of the branched-chain amino acid transport genes	lrp	TRUE	TRUE	1RPGA@1236|Gammaproteobacteria,COG1522@1|root,COG1522@2|Bacteria,1MX7R@1224|Proteobacteria,3XMYH@561|Escherichia			K
GUT_GENOME007510_02454	976.448	Inner membrane protein PRK11099	yeeE	TRUE	FALSE	1MWWP@1224|Proteobacteria,1RR58@1236|Gammaproteobacteria,COG2391@1|root,COG2391@2|Bacteria	2666		R	1	0
GUT_GENOME008568_02344	849.051	Putative neutral zinc metallopeptidase	ypfJ	TRUE	TRUE	1MU4U@1224|Proteobacteria,1RMF8@1236|Gammaproteobacteria,3XMEM@561|Escherichia,COG2321@1|root,COG2321@2|Bacteria			R
GUT_GENOME008568_03095	450.434	Domain of unknown function (DUF5107)	yphG	FALSE	TRUE	COG0457@1|root,COG0457@2|Bacteria,1Q3TC@1224|Proteobacteria,3XP8A@561|Escherichia,1RRC8@1236|Gammaproteobacteria	2737		R	0	1
GUT_GENOME008568_03129	658.721	hydrolase activity		TRUE	FALSE	4QHXI@10662|Myoviridae	1569			1	0
GUT_GENOME008568_03133	499.134			TRUE	FALSE	4QIX0@10662|Myoviridae	1574			0.964286	0.642857
GUT_GENOME008568_03966	354	Required for nucleoid occlusion (NO) phenomenon, which prevents Z-ring formation and cell division over the nucleoid. Acts as a DNA-associated cell division inhibitor that binds simultaneously chromosomal DNA and FtsZ, and disrupts the assembly of FtsZ polymers. SlmA-DNA-binding sequences (SBS) are dispersed on non-Ter regions of the chromosome, preventing FtsZ polymerization at these regions	slmA	TRUE	TRUE	1RPZ6@1236|Gammaproteobacteria,3XNEV@561|Escherichia,COG1309@1|root,1MWF7@1224|Proteobacteria,COG1309@2|Bacteria	2068		K	1	1
GUT_GENOME008695_01200	568.038	PPIases accelerate the folding of proteins. It catalyzes the cis-trans isomerization of proline imidic peptide bonds in oligopeptides	ppiA	TRUE	TRUE	1R9ZQ@1224|Proteobacteria,COG0652@2|Bacteria,1RP9U@1236|Gammaproteobacteria,COG0652@1|root,3XMM6@561|Escherichia			O
GUT_GENOME009066_00755	1463.79	Part of the tripartite efflux system EmrAB-TolC, which confers resistance to antibiotics	emrB	TRUE	TRUE	1MU1I@1224|Proteobacteria,3XPHW@561|Escherichia,COG0477@1|root,COG2814@2|Bacteria,1RNTG@1236|Gammaproteobacteria			E,G,P,R,U
GUT_GENOME009066_00781	418	Transcriptional regulator	phnF	TRUE	TRUE	1Q856@1224|Proteobacteria,3XQWA@561|Escherichia,1RQ3N@1236|Gammaproteobacteria,COG2188@2|Bacteria,COG2188@1|root	402		K	1	1
GUT_GENOME009850_03354	316.75	Catalyzes the irreversible cleavage of the glycosidic bond in both 5'-methylthioadenosine (MTA) and S- adenosylhomocysteine (SAH AdoHcy) to adenine and the corresponding thioribose, 5'-methylthioribose and S-ribosylhomocysteine, respectively	mtnN	FALSE	TRUE	COG0775@2|Bacteria,COG0775@1|root,1RNSF@1236|Gammaproteobacteria,3XNQB@561|Escherichia,1MY5S@1224|Proteobacteria	1532		F,H	0	1
GUT_GENOME009980_02403	349.68	the actual physiological substrates are not known. Also displays a modest GSH-dependent peroxidase activity toward several organic hydroperoxides, such as cumene hydroperoxide and linoleic acid 13(S)-hydroperoxide, but does not reduce H(2)O(2) or tert- butyl hydroperoxide at appreciable rates. Exhibits little or no GSH transferase activity with most typical electrophilic substrates, and has no de…	yghU	TRUE	TRUE	COG0625@2|Bacteria,COG0625@1|root,3XMFV@561|Escherichia,1RMF7@1236|Gammaproteobacteria,1MUN3@1224|Proteobacteria	1649		O	1	1
GUT_GENOME010012_01724	1261.47	Ligates lysine onto the cytidine present at position 34 of the AUA codon-specific tRNA(Ile) that contains the anticodon CAU, in an ATP-dependent manner. Cytidine is converted to lysidine, thus changing the amino acid specificity of the tRNA from methionine to isoleucine	tilS	TRUE	TRUE	COG0037@1|root,1MU85@1224|Proteobacteria,1RN14@1236|Gammaproteobacteria,COG0037@2|Bacteria,3XP50@561|Escherichia			J
GUT_GENOME010035_00051	457.932	Plays a role in L-cysteine detoxification. Binds to the dlsT(yhaO)-yhaM operon promoter in the presence but not absence of L-cysteine	ybaO	TRUE	TRUE	COG1522@2|Bacteria,COG1522@1|root,3XPDQ@561|Escherichia,1S2E1@1236|Gammaproteobacteria,1RDB3@1224|Proteobacteria			K
GUT_GENOME010035_00069	924.676	Cytochrome bo(3) ubiquinol terminal oxidase is the component of the aerobic respiratory chain of E.coli that predominates when cells are grown at high aeration. Has proton pump activity across the membrane in addition to electron transfer, pumping 2 protons electron	cyoA	TRUE	TRUE	COG1622@2|Bacteria,COG1622@1|root,1RP4H@1236|Gammaproteobacteria,1MWHZ@1224|Proteobacteria,3XMMP@561|Escherichia			C
GUT_GENOME010720_02029	846.021	Belongs to the class-II aminoacyl-tRNA synthetase family	lysS	TRUE	TRUE	1RMJN@1236|Gammaproteobacteria,COG1190@1|root,1MX1V@1224|Proteobacteria,COG1190@2|Bacteria,3XM7X@561|Escherichia	2220		J	1	1
GUT_GENOME010836_00438	7422.4	von willebrand factor, type A	lapA	TRUE	TRUE	COG2911@2|Bacteria,COG2911@1|root,1RMZW@1236|Gammaproteobacteria,1MU7T@1224|Proteobacteria,COG2373@2|Bacteria,COG3291@1|root,COG2373@1|root,COG2931@1|root,COG2931@2|Bacteria,COG3291@2|Bacteria	1485		Q,R,U	0.2	0.866667
GUT_GENOME010836_00728	426.434	SNARE associated Golgi protein	yqaA	FALSE	TRUE	1RHUV@1224|Proteobacteria,1S69A@1236|Gammaproteobacteria,COG1238@1|root,COG1238@2|Bacteria,3XPQC@561|Escherichia	2470			0	1
GUT_GENOME010836_00904	250.154			TRUE	TRUE		1442			1	1
GUT_GENOME010836_01526	1918.51	lysine decarboxylase	ldcC	TRUE	TRUE	1MWK4@1224|Proteobacteria,COG1982@2|Bacteria,COG1982@1|root,1RMVF@1236|Gammaproteobacteria,3XP4E@561|Escherichia			E
GUT_GENOME010836_01605	797.478	Formation of pseudouridine at positions 38, 39 and 40 in the anticodon stem and loop of transfer RNAs	truA	TRUE	TRUE	COG0101@1|root,1RMK2@1236|Gammaproteobacteria,1MUYI@1224|Proteobacteria,COG0101@2|Bacteria,3XNAY@561|Escherichia			J
GUT_GENOME010836_02060	243			TRUE	TRUE
GUT_GENOME010836_02307	872.813	Efficiently catalyzes the hydrolysis of the 3'-phosphate from 3',5'-bis-phosphonucleotides as well as the successive hydrolysis of 5'-phosphomononucleotides from the 5'-end of short pieces of RNA and DNA, with no specificity toward the identity of the nucleotide base. Is more efficient at hydrolyzing RNA oligonucleotides than DNA oligonucleotides. This enzyme can also hydrolyze annealed DNA duple…	trpH	TRUE	TRUE	COG0613@2|Bacteria,COG0613@1|root,3XNVX@561|Escherichia,1MWIH@1224|Proteobacteria,1RNCG@1236|Gammaproteobacteria			F
GUT_GENOME010836_02570	398.198			FALSE	TRUE	1VPBC@1239|Firmicutes,31BKE@2|Bacteria,4HSWR@91061|Bacilli,2AKTD@1|root
GUT_GENOME010836_02794	651.2	Phage minor tail protein L		TRUE	TRUE	COG4672@1|root,1S2IE@1236|Gammaproteobacteria,1N0JB@1224|Proteobacteria,COG4672@2|Bacteria	485		X	1	1
GUT_GENOME010980_00475	238.5	The physiological role of BioH is to remove the methyl group introduced by BioC when the pimeloyl moiety is complete. It allows to synthesize pimeloyl-ACP via the fatty acid synthetic pathway through the hydrolysis of the ester bonds of pimeloyl-ACP esters	bioH	TRUE	TRUE		1533			1	1
GUT_GENOME010980_00581	1111.34	transmembrane transport	ybjJ	TRUE	TRUE	1MVR9@1224|Proteobacteria,1RNEI@1236|Gammaproteobacteria,3XNSE@561|Escherichia,COG0738@1|root,COG0738@2|Bacteria			G
GUT_GENOME010980_00637	1100.79	This is one of three E.coli hydrogenases synthesized in response to different physiological conditions. HYD2 is involved in hydrogen uptake	hybO	TRUE	TRUE	1MWAC@1224|Proteobacteria,COG1740@2|Bacteria,COG1740@1|root,3XMNB@561|Escherichia,1RNTJ@1236|Gammaproteobacteria			C
GUT_GENOME010980_00805	1028.51	Catalyzes the irreversible NADPH-dependent deamination of GMP to IMP. It functions in the conversion of nucleobase, nucleoside and nucleotide derivatives of G to A nucleotides, and in maintaining the intracellular balance of A and G nucleotides	guaC	TRUE	TRUE	COG0516@2|Bacteria,COG0516@1|root,1MUJM@1224|Proteobacteria,1RPZY@1236|Gammaproteobacteria,3XNMG@561|Escherichia			F
GUT_GENOME010980_01119	1087.76	L-serine dehydratase	sdaB	TRUE	TRUE	1MUZN@1224|Proteobacteria,COG1760@2|Bacteria,COG1760@1|root,1RMJZ@1236|Gammaproteobacteria,3XNJ4@561|Escherichia			E
GUT_GENOME010980_01522	1235.69	transport or processing of arabinose polymers	araJ	TRUE	TRUE	1RRZF@1236|Gammaproteobacteria,1MU9G@1224|Proteobacteria,COG0477@1|root,COG2814@2|Bacteria			E,G,P,R
GUT_GENOME010980_01686	848.553	Sigma factors are initiation factors that promote the attachment of RNA polymerase to specific initiation sites and are then released. This sigma factor is involved in regulation of expression of heat shock genes	rpoH	TRUE	TRUE	1MVWR@1224|Proteobacteria,1RMFR@1236|Gammaproteobacteria,COG0568@1|root,COG0568@2|Bacteria,3XM8B@561|Escherichia			K
GUT_GENOME010980_01787	1401.05	Catalyzes the conversion of inosine 5'-phosphate (IMP) to xanthosine 5'-phosphate (XMP), the first committed and rate- limiting step in the de novo synthesis of guanine nucleotides, and therefore plays an important role in the regulation of cell growth	guaB	TRUE	TRUE	COG0517@1|root,COG0516@2|Bacteria,COG0516@1|root,1RMT8@1236|Gammaproteobacteria,1MUJM@1224|Proteobacteria,COG0517@2|Bacteria,3XNH9@561|Escherichia			F,T
GUT_GENOME010980_03745	988.855	UPF0313 protein YgiQ	ygiQ	TRUE	TRUE	1MUG3@1224|Proteobacteria,COG1032@2|Bacteria,COG1032@1|root,3XN2Q@561|Escherichia,1RN9V@1236|Gammaproteobacteria	1962		C,R	1	1
GUT_GENOME010980_03896	1285.32	Decarboxylase involved in the decarboxylation and detoxification of phenolic derivatives under both aerobic and anaerobic conditions. It is able to catalyze the reversible decarboxylation of 4-hydroxybenzoate and vanillate	vdcC	TRUE	TRUE	COG0043@1|root,1RRK9@1236|Gammaproteobacteria,COG0043@2|Bacteria,1MU62@1224|Proteobacteria,3XQFY@561|Escherichia	2643		H	1	0.857143
GUT_GENOME011158_00249	398.166	acyl-CoA hydrolase activity	tesC	TRUE	TRUE	1REIH@1224|Proteobacteria,COG0824@2|Bacteria,COG0824@1|root,1S40Z@1236|Gammaproteobacteria,3XPNH@561|Escherichia			I
GUT_GENOME011158_01420	1148.9	mannose-6-phosphate isomerase	manA	TRUE	TRUE	1MUD8@1224|Proteobacteria,COG1482@2|Bacteria,COG1482@1|root,1RQX8@1236|Gammaproteobacteria,3XN57@561|Escherichia			G
GUT_GENOME011158_02727	258.469	Belongs to the SOS response-associated peptidase family	yedK	TRUE	FALSE	COG2135@2|Bacteria,COG2135@1|root,3XMZS@561|Escherichia,1RSBH@1236|Gammaproteobacteria,1RER4@1224|Proteobacteria			E,L
GUT_GENOME011636_02567	1231.6	outer membrane usher protein	yehB	TRUE	TRUE	1RMPU@1236|Gammaproteobacteria,3XN71@561|Escherichia,COG3188@1|root,1MUHE@1224|Proteobacteria,COG3188@2|Bacteria	2693		N,U,W	0.901099	0.901099
GUT_GENOME011636_02659	465.6	geranyltranstransferase activity		TRUE	TRUE	1N16Y@1224|Proteobacteria,1SC67@1236|Gammaproteobacteria,COG0142@1|root,COG0142@2|Bacteria			H
GUT_GENOME011636_02680	872.149	belongs to the aldehyde dehydrogenase family	hpaE	FALSE	TRUE	1MU1V@1224|Proteobacteria,1RMBQ@1236|Gammaproteobacteria,COG1012@2|Bacteria,COG1012@1|root	2703		C,I	0	1
GUT_GENOME011767_01942	647.732	Its real enzymatic activity is not yet known. It was tested for general esterase, aminopeptidase, sulfatase, phosphatase, carbonic anhydrase, phosphodiesterase, and phosphotriesterase activities with the following substrates p- nitrophenyl acetate, L-alanine nitroanilide, p-nitrophenyl sulfate, bis(p-nitrophenyl) phosphate, paraoxon, and p-nitrophenyl phosphate. No enzymatic activity was detected…	php	TRUE	TRUE	COG1735@1|root,1RRE8@1236|Gammaproteobacteria,1NPYS@1224|Proteobacteria,COG1735@2|Bacteria,3XN00@561|Escherichia			R
GUT_GENOME011838_03134	575.473	Catalyzes the dehydration of D-mannonate	uxuA	TRUE	FALSE	1MWYD@1224|Proteobacteria,1RR0Q@1236|Gammaproteobacteria,3XNJN@561|Escherichia,COG1312@1|root,COG1312@2|Bacteria	1870		G	1	0
GUT_GENOME011955_00985	586.544	Flavin prenyltransferase that catalyzes the synthesis of the prenylated FMN cofactor (prenyl-FMN) for phenolic acid decarboxylase C	pad1	TRUE	TRUE	1RA0P@1224|Proteobacteria,COG0163@2|Bacteria,1RPN1@1236|Gammaproteobacteria,COG0163@1|root	2643		H	1	0.857143
GUT_GENOME011955_03504	267	Protects cells from HOCl (hypochlorite) stress but not peroxide or diamide stress. Decreases the intracellular load of reactive oxygen species by up-regulating genes involved in methionine and cysteine biosynthesis and down-regulating Fur- regulated genes involved in iron acquisition. Has also been suggested to down-regulate expression of the flagellar regulon, decreasing motility, but this activ…	yjiE	TRUE	TRUE	1R4QT@1224|Proteobacteria,1RR79@1236|Gammaproteobacteria,3XQW2@561|Escherichia,COG0583@1|root,COG0583@2|Bacteria	715		K	1	1
GUT_GENOME012042_03164	974.443	Involved in the bidirectional transport of formate	focA	TRUE	TRUE	1RQ6K@1236|Gammaproteobacteria,1MU0W@1224|Proteobacteria,COG2116@1|root,COG2116@2|Bacteria,3XN70@561|Escherichia			P
GUT_GENOME012311_01778	2075.93	belongs to the CobB CobQ family	pta	TRUE	TRUE	COG0857@1|root,COG0857@2|Bacteria,COG0280@2|Bacteria,1QTS5@1224|Proteobacteria,1RMJS@1236|Gammaproteobacteria,COG0280@1|root,3XM61@561|Escherichia			C,R
GUT_GENOME012311_01816	312	AraC-like ligand binding domain	pobR	FALSE	TRUE	COG2207@2|Bacteria,COG2207@1|root,COG0662@2|Bacteria,COG0662@1|root,3XR6P@561|Escherichia,1RZI8@1236|Gammaproteobacteria,1MXDJ@1224|Proteobacteria	2620		G,K	0	1
GUT_GENOME012311_03556	552.849	Hydrolyzes the N-terminal methionine when the next amino acid is alanine, proline or serine. The substrate preference for methionyl aminopeptidase activity is Pro Ala Ser. Also able to hydrolyze the Xaa-Pro peptide bond when the first amino acid is alanine, asparagine or methionine	ypdF	FALSE	TRUE	COG0006@2|Bacteria,1RYKI@1236|Gammaproteobacteria,1MUZS@1224|Proteobacteria,COG0006@1|root,3XNJ0@561|Escherichia			E
GUT_GENOME012311_03749	583.632	Protein and nucleotide deglycase that catalyzes the deglycation of the Maillard adducts formed between amino groups of proteins or nucleotides and reactive carbonyl groups of glyoxals. Thus, functions as a protein deglycase that repairs methylglyoxal- and glyoxal-glycated proteins, and releases repaired proteins and lactate or glycolate, respectively. Deglycates cysteine, arginine and lysine resi…	thiJ	TRUE	TRUE	1N7T2@1224|Proteobacteria,1RSBI@1236|Gammaproteobacteria,3XNCF@561|Escherichia,COG0693@1|root,COG0693@2|Bacteria	155		V	1	1
GUT_GENOME012311_03827	453.75	lrp mediates this effect for at least some of these operons. For example it is regulator of the branched-chain amino acid transport genes	lrp	TRUE	TRUE	COG1522@2|Bacteria,COG1522@1|root,3XMYH@561|Escherichia,1RPGA@1236|Gammaproteobacteria,1MX7R@1224|Proteobacteria			K
GUT_GENOME012317_01694	227.386			TRUE	TRUE	1NYKB@1224|Proteobacteria,1SR1H@1236|Gammaproteobacteria,2F6ZN@1|root,33ZFJ@2|Bacteria
GUT_GENOME012467_01753	1324.01	gluconate transmembrane transporter activity	ygbN	TRUE	FALSE	1MUFG@1224|Proteobacteria,COG2610@2|Bacteria,COG2610@1|root,1RNGE@1236|Gammaproteobacteria,3XNU2@561|Escherichia	138		E,G	0.444444	0.444444
GUT_GENOME012649_00791	1770.65	Involved in the active translocation of vitamin B12 (cyanocobalamin) across the outer membrane to the periplasmic space. It derives its energy for transport by interacting with the trans-periplasmic membrane protein TonB	btuB	TRUE	TRUE	1MW63@1224|Proteobacteria,1RMFJ@1236|Gammaproteobacteria,COG4206@1|root,COG4206@2|Bacteria,3XN0V@561|Escherichia	1561		H,P	1	1
GUT_GENOME012649_02023	544.278	homoserine dehydrogenase I	thrA	TRUE	TRUE	3XN2A@561|Escherichia,1RN1G@1236|Gammaproteobacteria,1MW3H@1224|Proteobacteria,COG0460@1|root,COG0460@2|Bacteria,COG0527@1|root,COG0527@2|Bacteria			E
GUT_GENOME012649_02806	256.547	BMC		TRUE	FALSE	3XR0Y@561|Escherichia,336KU@2|Bacteria,1N0TS@1224|Proteobacteria,1SA1K@1236|Gammaproteobacteria,2DQFX@1|root	1322			1	0
GUT_GENOME012952_01885	942.682	phosphoglucomutase activity	pgm	TRUE	FALSE	COG0033@2|Bacteria,COG0033@1|root,1RPDV@1236|Gammaproteobacteria,1MU5S@1224|Proteobacteria,3XNB7@561|Escherichia	1910		G	1	0.5
GUT_GENOME013584_03502	802.082	Belongs to the UPF0354 family		TRUE	TRUE	1NE0R@1224|Proteobacteria,COG4848@1|root,1SDSW@1236|Gammaproteobacteria,COG4848@2|Bacteria	1336		R	0.0769231	0.0769231
GUT_GENOME013626_00060	2040.44	Presumed to be a dehydrogenase, but possibly an oxidase. Participates in limited purine salvage (requires aspartate) but does not support aerobic growth on purines as the sole carbon source (purine catabolism)	xdhA	TRUE	TRUE	1RN40@1236|Gammaproteobacteria,COG1529@1|root,COG1529@2|Bacteria,1MUEA@1224|Proteobacteria,3XQ6N@561|Escherichia			C,F
GUT_GENOME013965_03253	815.25			TRUE	TRUE	1S0SS@1236|Gammaproteobacteria,1N25G@1224|Proteobacteria,2Z8VW@2|Bacteria,28IY3@1|root
GUT_GENOME013965_03887	479.508	Belongs to the Nudix hydrolase family	gmm	TRUE	TRUE	COG1051@1|root,COG1051@2|Bacteria,1S6M4@1236|Gammaproteobacteria,3XPJG@561|Escherichia,1MZDA@1224|Proteobacteria	278		F	1	1
GUT_GENOME014148_02514	523.488	SCP-2 sterol transfer family	yhbT	TRUE	TRUE	COG3154@2|Bacteria,1RB7T@1224|Proteobacteria,1RMJD@1236|Gammaproteobacteria,COG3154@1|root,3XMBQ@561|Escherichia			H,I
GUT_GENOME014148_02544	532.338	Purine nucleoside phosphorylase	deoD	TRUE	TRUE	COG0813@2|Bacteria,COG0813@1|root,3XP9J@561|Escherichia,1RMMA@1236|Gammaproteobacteria,1MUW6@1224|Proteobacteria	1992		F	1	1
GUT_GENOME014187_03570	435	Dihydrodipicolinate synthetase family	yjhH	FALSE	TRUE	1MXI1@1224|Proteobacteria,1RPXI@1236|Gammaproteobacteria,3WWVN@544|Citrobacter,COG0329@1|root,COG0329@2|Bacteria	418		E,M	0	1
GUT_GENOME014187_03874	385.773	Methyl-transferase	yjhP	FALSE	TRUE	1MXAK@1224|Proteobacteria,COG2519@2|Bacteria,COG2519@1|root,1RSIH@1236|Gammaproteobacteria	418		J	0	1
GUT_GENOME014333_00136	925.943	uxaCA, sdaCB and yjiY. H-NS repression of the bgl operon, leading to the ability to metabolize some beta-glucosides. It also directly activates the bgl operon. Activation is H-NS and BglJ-RcsB independent	leuO	TRUE	TRUE	COG0583@2|Bacteria,COG0583@1|root,1RQP0@1236|Gammaproteobacteria,1MX24@1224|Proteobacteria,3XM7V@561|Escherichia			K
GUT_GENOME014333_00317	743.625	to Shigella flexneri,and Shigella flexneri 2A IS10 orf S0034 or Cp0027 SWALL Q9AFX7 (EMBL AF348706) (407 aa) fasta scores E()		FALSE	TRUE	COG5421@2|Bacteria,COG5421@1|root,1T21N@1236|Gammaproteobacteria,1QUUP@1224|Proteobacteria	2455		L,X	0	1
GUT_GENOME014333_03263	868.223	Peptidase family M28	yfbL	TRUE	TRUE	COG2234@1|root,COG2234@2|Bacteria,3XP3R@561|Escherichia,1S0QR@1236|Gammaproteobacteria,1MXZS@1224|Proteobacteria	2733		E,O	1	1
GUT_GENOME014333_03921	491.729	Dimethyl sulfoxide reductase	dmsA	FALSE	TRUE	1NR6J@1224|Proteobacteria,1RMVE@1236|Gammaproteobacteria,COG0243@2|Bacteria,3XN4H@561|Escherichia,COG0243@1|root	2592		C	0	1
GUT_GENOME014723_01382	553.091	Involved in the active translocation of vitamin B12 (cyanocobalamin) across the outer membrane to the periplasmic space. It derives its energy for transport by interacting with the trans-periplasmic membrane protein TonB	btuB	TRUE	TRUE	COG4206@2|Bacteria,COG4206@1|root,3XN0V@561|Escherichia,1RMFJ@1236|Gammaproteobacteria,1MW63@1224|Proteobacteria			H,P
GUT_GENOME014917_04129	483	Escherichia coli O157 H7 ortholog z1655	yfjQ	TRUE	TRUE	1RMPH@1236|Gammaproteobacteria,28H9R@1|root,2Z7MD@2|Bacteria,3XNIG@561|Escherichia,1MVTR@1224|Proteobacteria	711			0.333333	0.111111
GUT_GENOME015005_03908	264.923	Protein of unknown function (DUF445)	yjiN	TRUE	TRUE	COG2733@2|Bacteria,COG2733@1|root,3XMNE@561|Escherichia,1RNR7@1236|Gammaproteobacteria,1MX3G@1224|Proteobacteria	295			1	1
GUT_GENOME015144_00492	731.584	beta-lactamase	ampC	TRUE	TRUE	COG1680@2|Bacteria,1RNUI@1236|Gammaproteobacteria,1MY01@1224|Proteobacteria,COG1680@1|root,3XNQH@561|Escherichia			V
GUT_GENOME015386_03102	657.799	Mediates aggregation, biofilm formation and adhesion to a range of extracellular matrix (ECM) proteins, such as fibronectin, fibrinogen, laminin and collagen types I, II, III, and V. Mediates adhesion to	xadA	FALSE	TRUE	1N338@1224|Proteobacteria,1RPXV@1236|Gammaproteobacteria,COG5295@1|root,COG5295@2|Bacteria,3XNG0@561|Escherichia	1464		U,W	0	0.5
GUT_GENOME015386_03185	1373.61	Glucuronate isomerase	uxaC	TRUE	TRUE	1MVRI@1224|Proteobacteria,COG1904@2|Bacteria,COG1904@1|root,1RMRR@1236|Gammaproteobacteria,3XMN1@561|Escherichia			G
GUT_GENOME015968_00106	513	Thioesterase domain	irp4	TRUE	TRUE	COG3208@1|root,41HUT@629|Yersinia,1S4T9@1236|Gammaproteobacteria,1RGYT@1224|Proteobacteria,COG3208@2|Bacteria			Q
GUT_GENOME015968_01071	1348.55	Amino acid permease	pheP	TRUE	TRUE	1MUPS@1224|Proteobacteria,1RNK0@1236|Gammaproteobacteria,3XNBE@561|Escherichia,COG1113@1|root,COG1113@2|Bacteria			E
GUT_GENOME015968_01087	345	May be a ligase forming an amide bond. Shows ATPase activity	ygiC	TRUE	TRUE	COG0754@2|Bacteria,COG0754@1|root,3XN5K@561|Escherichia,1RQAP@1236|Gammaproteobacteria,1MW6V@1224|Proteobacteria	1549		E	0.5	0.5
GUT_GENOME015968_01228	602.807	Helix-turn-helix domain	yfdO	TRUE	TRUE	2DST2@1|root,1SHSV@1236|Gammaproteobacteria,33HBT@2|Bacteria,1NMMI@1224|Proteobacteria,3XQ44@561|Escherichia	2508			1	0.5
GUT_GENOME015968_01377	528	N-acetylmuramoyl-L-alanine amidase activity		FALSE	TRUE	4QAK6@10239|Viruses,4QPBY@28883|Caudovirales,4QUP9@35237|dsDNA viruses no RNA stage
GUT_GENOME015968_01561	1248.76	Catalyzes the condensation of two molecules of glyoxylate to give 2-hydroxy-3-oxopropanoate (also termed tartronate semialdehyde)	gcl	TRUE	TRUE	1RW45@1236|Gammaproteobacteria,1MV88@1224|Proteobacteria,COG3960@1|root,3XQHP@561|Escherichia,COG3960@2|Bacteria			Q
GUT_GENOME015968_01934	526.772	gluconokinase activity	gntK	TRUE	TRUE	1RP41@1236|Gammaproteobacteria,COG3265@1|root,COG3265@2|Bacteria,1RHD0@1224|Proteobacteria,3XN1N@561|Escherichia			F,G
GUT_GENOME015968_02050	712.561	Catalyzes the phosphorylation of pyruvate to phosphoenolpyruvate	ppsA	TRUE	TRUE	1RP3T@1236|Gammaproteobacteria,COG1080@2|Bacteria,COG1080@1|root,COG0574@2|Bacteria,1MU0R@1224|Proteobacteria,COG0574@1|root,3XMCT@561|Escherichia	860		G	0.25	0.25
GUT_GENOME015968_02497	732.231	Catalyzes the radical-mediated insertion of two sulfur atoms into the C-6 and C-8 positions of the octanoyl moiety bound to the lipoyl domains of lipoate-dependent enzymes, thereby converting the octanoylated domains into lipoylated derivatives	lipA	TRUE	TRUE	3XP60@561|Escherichia,1MVRD@1224|Proteobacteria,COG0320@1|root,COG0320@2|Bacteria,1RMAT@1236|Gammaproteobacteria			H
GUT_GENOME016066_00897	848.357	The actual biological function of YdiB remains unclear, nor is it known whether 3-dehydroshikimate or quinate represents the natural substrate. Catalyzes the reversible NAD-dependent reduction of both 3-dehydroshikimate (DHSA) and 3-dehydroquinate to yield shikimate (SA) and quinate, respectively. It can use both NAD or NADP for catalysis, however it has higher catalytic efficiency with NAD	ydiB	TRUE	TRUE	COG0169@2|Bacteria,3XNUP@561|Escherichia,COG0169@1|root,1RS73@1236|Gammaproteobacteria,1MVH4@1224|Proteobacteria			E
GUT_GENOME016066_02583	399.404	oxidoreductase activity	ygjR	TRUE	TRUE	COG0673@2|Bacteria,COG0673@1|root,1RS5T@1236|Gammaproteobacteria,1MZIG@1224|Proteobacteria			R
GUT_GENOME016066_03595	294	Could be a mediator in iron transactions between iron acquisition and iron-requiring processes, such as synthesis and or repair of Fe-S clusters in biosynthetic enzymes	yggX	TRUE	TRUE	COG2924@1|root,COG2924@2|Bacteria,3XPVI@561|Escherichia,1S964@1236|Gammaproteobacteria,1MZ2V@1224|Proteobacteria	2467		C,O,P	1	1
GUT_GENOME016099_01209	1126.12	Belongs to the membrane fusion protein (MFP) (TC 8.A.1) family	acrE	TRUE	TRUE	1MU78@1224|Proteobacteria,1RPI1@1236|Gammaproteobacteria,3XNKF@561|Escherichia,COG0845@1|root,COG0845@2|Bacteria			M,V
GUT_GENOME016099_01677	2248.92	tail length tape measure		FALSE	TRUE	COG5281@1|root,COG5281@2|Bacteria,COG1196@1|root,1RS6P@1236|Gammaproteobacteria,1MU81@1224|Proteobacteria,COG1196@2|Bacteria	2405		D,X	0	1
GUT_GENOME016207_00518	559.574	Involved in the TonB-independent uptake of	tolQ	TRUE	TRUE	1RMD4@1236|Gammaproteobacteria,1NCWW@1224|Proteobacteria,COG0811@2|Bacteria,COG0811@1|root,3XN9R@561|Escherichia			U
GUT_GENOME016207_01622	901.323	LysR substrate binding domain	nac	TRUE	TRUE	1MXR1@1224|Proteobacteria,COG0583@1|root,COG0583@2|Bacteria,1RPF3@1236|Gammaproteobacteria,3XM4K@561|Escherichia			K
GUT_GENOME016207_01646	431.509	Rhodanese-like domain	yibN	TRUE	TRUE	1MZ83@1224|Proteobacteria,1S8ZI@1236|Gammaproteobacteria,COG0607@1|root,COG0607@2|Bacteria,3XNPZ@561|Escherichia			P
GUT_GENOME016207_02112	868.294	Belongs to the N(4) N(6)-methyltransferase family	yhdJ	TRUE	TRUE	1MX9M@1224|Proteobacteria,COG2189@2|Bacteria,1S17I@1236|Gammaproteobacteria,COG2189@1|root,3XMME@561|Escherichia			L
GUT_GENOME016220_01801	858.829	sequence-specific DNA binding	yidL	TRUE	TRUE	1R5IW@1224|Proteobacteria,COG2207@2|Bacteria,COG2207@1|root,3XRCD@561|Escherichia,1S033@1236|Gammaproteobacteria	283		K	1	1
GUT_GENOME016269_01780	403.694	Removes maltotriose and maltotetraose chains that are attached by 1,6-alpha-linkage to the limit dextrin main chain, generating a debranched limit dextrin	glgX	TRUE	TRUE	1MU19@1224|Proteobacteria,1RP6F@1236|Gammaproteobacteria,3XNET@561|Escherichia,COG1523@1|root,COG1523@2|Bacteria			G
GUT_GENOME016290_01033	1754.55	Colicin I receptor	cirA	TRUE	TRUE	1RNHR@1236|Gammaproteobacteria,COG4771@2|Bacteria,COG1629@1|root,1MUC1@1224|Proteobacteria,3XM4N@561|Escherichia			P
GUT_GENOME016290_01730	249.023	response to hypochlorite	ykgI	FALSE	TRUE	1SG5Y@1236|Gammaproteobacteria,1NATQ@1224|Proteobacteria,2EF6J@1|root,338ZN@2|Bacteria,3XR9X@561|Escherichia	2451			0	1
GUT_GENOME016420_00446	1646.52	Belongs to the ribulokinase family	araB	TRUE	TRUE	COG1069@2|Bacteria,1MY11@1224|Proteobacteria,COG1069@1|root,1RP3F@1236|Gammaproteobacteria,3XNYZ@561|Escherichia			F,G
GUT_GENOME016420_02291	468.273	May be involved in recombination	rdgC	TRUE	FALSE	1MXPR@1224|Proteobacteria,1RMNN@1236|Gammaproteobacteria,3XN1U@561|Escherichia,COG2974@2|Bacteria,COG2974@1|root			J,L
GUT_GENOME016596_01246	650.838			FALSE	TRUE
GUT_GENOME016596_01277	432.1			FALSE	TRUE	4QAIP@10239|Viruses,4QMZV@10699|Siphoviridae,4QRAG@28883|Caudovirales,4QXXX@35237|dsDNA viruses no RNA stage
GUT_GENOME016596_01296	252			FALSE	TRUE
GUT_GENOME016606_02772	282	In the presence of manganese, represses expression of mntH and mntS. Up-regulates expression of mntP	mntR	TRUE	TRUE	1RH2Z@1224|Proteobacteria,COG1321@1|root,3XM8T@561|Escherichia,1S2NA@1236|Gammaproteobacteria,COG1321@2|Bacteria	2174		K	1	1
GUT_GENOME016606_03069	213			TRUE	TRUE	1NH6A@1224|Proteobacteria,2DSBC@1|root,1SH66@1236|Gammaproteobacteria,33FD2@2|Bacteria,3XQ5X@561|Escherichia
GUT_GENOME016635_00263	1931.74	Forms an efflux pump with AaeA. Could function as a metabolic relief valve, allowing to eliminate certain compounds when they accumulate to high levels in the cell	aaeB	TRUE	TRUE	1MX9H@1224|Proteobacteria,1RPFA@1236|Gammaproteobacteria,COG1289@1|root,COG1289@2|Bacteria			U
GUT_GENOME016635_02644	252	zinc ion binding	ybiI	TRUE	TRUE	1MZIB@1224|Proteobacteria,1S8SP@1236|Gammaproteobacteria,3XPW0@561|Escherichia,COG1734@1|root,COG1734@2|Bacteria			K,T
GUT_GENOME016635_02919	830.5	Its participation in detoxification of cyanide may be small. May be involved in the enhancement of serine sensitivity	sseA	TRUE	TRUE	COG2897@2|Bacteria,1RSQ3@1236|Gammaproteobacteria,1MW4B@1224|Proteobacteria,3XMB1@561|Escherichia,COG2897@1|root			P
GUT_GENOME016729_00994	1326.66	inner membrane protein YtfL	ytfL	TRUE	TRUE	1MV3P@1224|Proteobacteria,1T1MS@1236|Gammaproteobacteria,COG1253@1|root,COG1253@2|Bacteria,3XNSD@561|Escherichia			P,R
GUT_GENOME016729_01047	1125.96	This protein promotes the GTP-dependent binding of aminoacyl-tRNA to the A-site of ribosomes during protein biosynthesis	tuf	TRUE	TRUE	COG0050@2|Bacteria,COG0050@1|root,1RMYX@1236|Gammaproteobacteria,1MVC0@1224|Proteobacteria,3ZITI@590|Salmonella			J
GUT_GENOME016729_01298	423.483	COG1943 Transposase and inactivated derivatives		FALSE	TRUE	COG1943@2|Bacteria,COG1943@1|root,1S4R2@1236|Gammaproteobacteria,1RDD7@1224|Proteobacteria,3ZAC3@586|Providencia	1501		L,X	0	0.666667
GUT_GENOME016729_01349	567.283	Flavin prenyltransferase that catalyzes the synthesis of the prenylated FMN cofactor (prenyl-FMN) for 4-hydroxy-3- polyprenylbenzoic acid decarboxylase UbiD. The prenyltransferase is metal-independent and links a dimethylallyl moiety from dimethylallyl monophosphate (DMAP) to the flavin N5 and C6 atoms of FMN	ubiX	TRUE	TRUE	1RA0P@1224|Proteobacteria,COG0163@2|Bacteria,COG0163@1|root,1RPN1@1236|Gammaproteobacteria,3XMA5@561|Escherichia			H
GUT_GENOME016729_01866	1094.55	Fimbrial protein		FALSE	TRUE	COG3539@1|root,COG3539@2|Bacteria,3XQY5@561|Escherichia,1TGFV@1236|Gammaproteobacteria,1QIKU@1224|Proteobacteria	2370		N,U	0	0.5
GUT_GENOME016729_01867	777.697	chaperone	fimB	FALSE	TRUE	COG3121@2|Bacteria,COG3121@1|root,2VRRR@28216|Betaproteobacteria,3T47I@506|Alcaligenaceae,1NJ71@1224|Proteobacteria	2370		N,U,W	0	0.5
GUT_GENOME016729_02647	228	Outer membrane usher protein fimD	fimD	TRUE	TRUE	COG3188@1|root,COG3188@2|Bacteria,3XMHU@561|Escherichia,1RMPU@1236|Gammaproteobacteria,1MUHE@1224|Proteobacteria	289		N,U,W	1	1
GUT_GENOME016729_03097	225.005	Inhibits DNA replication at both initiation and elongation steps, most probably by binding to the opened, single- stranded regions at replication forks. Plays a regulatory role in chromosomal replication in nutrient-depleted cells	cspD	TRUE	TRUE	1N6Q5@1224|Proteobacteria,COG1278@2|Bacteria,1SCA7@1236|Gammaproteobacteria,COG1278@1|root,3XPZU@561|Escherichia			K
GUT_GENOME016729_03403	856.48	Involved in the import of serine into the cell. May be required for phage C1 adsorption by interacting with DrcB. May also be involved in ampicillin sensitivity	sdaC	FALSE	TRUE	COG0814@2|Bacteria,1NQFA@1224|Proteobacteria,1RQ8Q@1236|Gammaproteobacteria,3XMD0@561|Escherichia,COG0814@1|root			E
GUT_GENOME016787_02123	1711.13	ATP diphosphatase activity	ycaO	TRUE	TRUE	COG1944@2|Bacteria,1RN47@1236|Gammaproteobacteria,COG1944@1|root,1MV7K@1224|Proteobacteria,3XNVF@561|Escherichia			J
GUT_GENOME017084_00342	386.782	Accelerates the release of ammonia from reactive enamine imine intermediates of the PLP-dependent threonine dehydratase (IlvA) in the low water environment of the cell. It catalyzes the deamination of enamine imine intermediates to yield 2-ketobutyrate and ammonia. It is required for the detoxification of reactive intermediates of IlvA due to their highly nucleophilic abilities. Involved in the i…	yjgF	TRUE	TRUE	1S5XS@1236|Gammaproteobacteria,1MZ3J@1224|Proteobacteria,COG0251@1|root,COG0251@2|Bacteria,3XPKX@561|Escherichia			J,V
GUT_GENOME017084_01410	444	transcriptional regulator	sgcR	FALSE	TRUE	COG1349@1|root,COG1349@2|Bacteria,1RYBN@1236|Gammaproteobacteria,1R689@1224|Proteobacteria	418		G,K	0	1
GUT_GENOME017084_02424	1052.24	Hydrolyzes c-di-GMP (cyclic bis(3'-5') dimeric GMP) to 5'-pGpG, known as PDE-A activity. PDE-B activity, that is hydrolysis of 5'-pGpG to GMP, proceeds only very slowly	yahA	FALSE	TRUE	1QWBM@1224|Proteobacteria,1SNPT@1236|Gammaproteobacteria,3XQF7@561|Escherichia,COG2200@1|root,COG2200@2|Bacteria,COG2771@2|Bacteria,COG2771@1|root			K,T
GUT_GENOME017084_02589	575.734	Domain of unknown function (DUF4862)		TRUE	TRUE	COG2731@2|Bacteria,COG2731@1|root,3XP74@561|Escherichia,1N8IZ@1224|Proteobacteria,1T0V3@1236|Gammaproteobacteria			G
GUT_GENOME017248_03098	425.189		ydhT	TRUE	TRUE	1R6VT@1224|Proteobacteria,1S0US@1236|Gammaproteobacteria,2DBJN@1|root,2Z9MR@2|Bacteria,3XQ4K@561|Escherichia
GUT_GENOME017355_00009	617.613			TRUE	FALSE	4QVRD@35237|dsDNA viruses no RNA stage,4QB4T@10239|Viruses,4QIS8@10662|Myoviridae,4QQPF@28883|Caudovirales	1573			0.8	0
GUT_GENOME017355_01382	207			TRUE	FALSE		1359			0.409396	0.0268456
GUT_GENOME017355_02133	696.872	Part of the histidine permease ABC transporter. Also part of a lysine arginine ornithine transporter. Probably responsible for the translocation of the substrate across the membrane. Required to relay the ATPase-inducing signal from the solute-binding protein to HisP (By similarity)	hisM	TRUE	TRUE	1RPT1@1236|Gammaproteobacteria,3XN40@561|Escherichia,COG4160@1|root,COG4160@2|Bacteria,1MWI6@1224|Proteobacteria			E
GUT_GENOME017355_02393	944.129	Responsible for synthesis of pseudouridine from uracil	rluC	TRUE	TRUE	COG0564@2|Bacteria,COG0564@1|root,3XM9P@561|Escherichia,1MVDX@1224|Proteobacteria,1RPAN@1236|Gammaproteobacteria			J
GUT_GENOME017369_00173	254.036			TRUE	FALSE		1575			0.911111	0.0222222
GUT_GENOME017369_00710	207			FALSE	TRUE		418			0	1
GUT_GENOME017369_04687	201	cysteine-type peptidase activity	yafL	TRUE	TRUE	COG0791@2|Bacteria,COG0791@1|root,3XP3U@561|Escherichia,1RP3P@1236|Gammaproteobacteria,1N0EE@1224|Proteobacteria	2104		M	0.5	0.5
GUT_GENOME017388_01370	778.235	Biodegradative arginine decarboxylase	adiA	FALSE	TRUE	COG1982@2|Bacteria,COG1982@1|root,1MWK4@1224|Proteobacteria,1RMVF@1236|Gammaproteobacteria,3XNRQ@561|Escherichia	1545		E	0	1
GUT_GENOME017388_01450	863.668	mannitol-1-phosphate 5-dehydrogenase activity	mtlD	TRUE	TRUE	COG0246@2|Bacteria,1RPCP@1236|Gammaproteobacteria,1MXV8@1224|Proteobacteria,COG0246@1|root,3XNQN@561|Escherichia			G
GUT_GENOME017388_01762	660.17	Splits dipeptides with a prolyl residue in the C- terminal position	pepQ	FALSE	TRUE	1MURT@1224|Proteobacteria,1RMKT@1236|Gammaproteobacteria,COG0006@1|root,COG0006@2|Bacteria,3XM9C@561|Escherichia	1683		E	0	1
GUT_GENOME017388_01810	398.798	Catalyzes the condensation of the acetyl group of acetyl-CoA with 3-methyl-2-oxobutanoate (2-oxoisovalerate) to form 3-carboxy-3-hydroxy-4-methylpentanoate (2-isopropylmalate)	leuA	TRUE	TRUE	COG0119@2|Bacteria,COG0119@1|root,3XNCN@561|Escherichia,1RMWE@1236|Gammaproteobacteria,1MUNQ@1224|Proteobacteria			E
GUT_GENOME017388_01841	534.073	L-valine transmembrane transporter activity	ygaZ	TRUE	TRUE	1P6U3@1224|Proteobacteria,1RRMC@1236|Gammaproteobacteria,COG1296@2|Bacteria,3XNS1@561|Escherichia,COG1296@1|root			E
GUT_GENOME017388_01846	527.042	Lipoprotein	yajI	TRUE	TRUE	1R569@1224|Proteobacteria,1RQCG@1236|Gammaproteobacteria,COG4238@2|Bacteria,COG4238@1|root,3XN74@561|Escherichia			M
GUT_GENOME017388_02036	735.429	Catalyzes the conversion of acetate into acetyl-CoA (AcCoA), an essential intermediate at the junction of anabolic and catabolic pathways. Acs undergoes a two-step reaction. In the first half reaction, Acs combines acetate with ATP to form acetyl- adenylate (AcAMP) intermediate. In the second half reaction, it can then transfer the acetyl group from AcAMP to the sulfhydryl group of CoA, forming t…	acsA	FALSE	TRUE	COG0365@2|Bacteria,COG0365@1|root,1RMNZ@1236|Gammaproteobacteria,1MUF5@1224|Proteobacteria,3XNZN@561|Escherichia	772		F,I	0	1
GUT_GENOME017636_00571	838.886	Prolyl oligopeptidase family	yfhR	TRUE	TRUE	COG1073@2|Bacteria,COG1073@1|root,1S2YT@1236|Gammaproteobacteria,1RFAF@1224|Proteobacteria,3XPC6@561|Escherichia			T
GUT_GENOME017636_01773	751.21	autolysis	nlpD	TRUE	TRUE	COG4942@2|Bacteria,COG4942@1|root,1RR11@1236|Gammaproteobacteria,1RD24@1224|Proteobacteria,3XNB1@561|Escherichia			D,M
GUT_GENOME017636_02377	918.635	oxidoreductase activity	hyfC	TRUE	TRUE	1RPCY@1236|Gammaproteobacteria,1MXV5@1224|Proteobacteria,COG0650@2|Bacteria,COG0650@1|root,3XNSF@561|Escherichia	2693		C	0.901099	0.901099
GUT_GENOME017680_01255	378.75	Involved in the degradation of galactose via the DeLey- Doudoroff pathway. Catalyzes the reversible, stereospecific retro- aldol cleavage of 2-keto-3-deoxy-6-phosphogalactonate (KDPGal) to pyruvate and D-glyceraldehyde-3-phosphate. In the synthetic direction, it catalyzes the addition of pyruvate to electrophilic aldehydes with re-facial selectivity. It can use a limited number of aldehyde substr…	dgoA	TRUE	TRUE	3XP06@561|Escherichia,1RQMK@1236|Gammaproteobacteria,1RD0T@1224|Proteobacteria,COG0800@1|root,COG0800@2|Bacteria			G
GUT_GENOME017751_01858	421.312			FALSE	TRUE	4QI9U@10662|Myoviridae,4QAU9@10239|Viruses
GUT_GENOME017751_01859	279.588	Protein of unknown function (DUF2856)		FALSE	TRUE	4QD2U@10239|Viruses,4QNRP@10744|Podoviridae,4QPUY@28883|Caudovirales,4R03T@35237|dsDNA viruses no RNA stage
GUT_GENOME017751_01889	231.49			FALSE	TRUE
GUT_GENOME017751_01897	324			FALSE	TRUE
GUT_GENOME017751_01905	558.787			FALSE	TRUE	1NDWR@1224|Proteobacteria,338RV@2|Bacteria,2C91S@1|root,1SG54@1236|Gammaproteobacteria
GUT_GENOME017751_01916	474			FALSE	TRUE	4QN6Z@10699|Siphoviridae,4QQ5A@28883|Caudovirales,4QGMC@10239|Viruses,4QZX9@35237|dsDNA viruses no RNA stage
GUT_GENOME017821_02188	201			TRUE	TRUE		479			1	1
GUT_GENOME017858_01798	201.333			FALSE	TRUE		2635			0	1
GUT_GENOME017879_00205	704.343	HTH-type transcriptional regulator YihL	yihL	FALSE	TRUE	1R4PN@1224|Proteobacteria,COG2188@1|root,1RQ87@1236|Gammaproteobacteria,COG2188@2|Bacteria,3XQCK@561|Escherichia	2672		K	0	1
GUT_GENOME017879_00218	597.905	Catalyzes the dephosphorylation of alpha-D-glucose 1- phosphate (Glc1P) and, to a lesser extent, of other sugar phosphates. Has no activity with the beta form of Glc1P. In addition, YihX has significant phosphatase activity against pyridoxal phosphate (PLP) and low beta-phosphoglucomutase activity	yihX	TRUE	TRUE	COG1011@2|Bacteria,1PGNF@1224|Proteobacteria,1RRDC@1236|Gammaproteobacteria,COG1011@1|root,3XMFZ@561|Escherichia			H
GUT_GENOME017879_00292	577.167	Belongs to the GPI family	pgi	TRUE	FALSE	1RNIT@1236|Gammaproteobacteria,1MUFP@1224|Proteobacteria,COG0166@2|Bacteria,COG0166@1|root,3XNB8@561|Escherichia	2508		F,G	1	0.5
GUT_GENOME017879_01830	1518.75	Catalyzes the interconversion of 2-phosphoglycerate and 3-phosphoglycerate	gpmI	TRUE	TRUE	1RMJE@1236|Gammaproteobacteria,COG0696@2|Bacteria,COG0696@1|root,1MUQ1@1224|Proteobacteria,3XMVW@561|Escherichia			F,G
GUT_GENOME017879_02375	607.459	Represses a number of genes involved in the response to DNA damage (SOS response), including recA and lexA. Binds to the 16 bp palindromic sequence 5'-CTGTATATATATACAG-3'. In the presence of single-stranded DNA, RecA interacts with LexA causing an autocatalytic cleavage which disrupts the DNA-binding part of LexA, leading to derepression of the SOS regulon and eventually DNA repair	lexA	TRUE	TRUE	1RMXF@1236|Gammaproteobacteria,COG1974@1|root,COG1974@2|Bacteria,3XP1V@561|Escherichia,1MW80@1224|Proteobacteria			K,T
GUT_GENOME017879_03020	460.514	Belongs to the Nudix hydrolase family. NudJ subfamily	nudJ	TRUE	TRUE	1N03W@1224|Proteobacteria,COG1051@2|Bacteria,COG1051@1|root,3XNRP@561|Escherichia,1S970@1236|Gammaproteobacteria			F
GUT_GENOME017879_03536	626.006	Required for disulfide bond formation in some periplasmic proteins such as PhoA or OmpA. Acts by transferring its disulfide bond to other proteins and is reduced in the process. DsbA is reoxidized by DsbB	dsbA	TRUE	TRUE	1S5WA@1236|Gammaproteobacteria,COG1651@1|root,1RGWH@1224|Proteobacteria,COG1651@2|Bacteria,3XNYE@561|Escherichia			O
GUT_GENOME017895_00089	636.094	Catalyzes the transfer of a formyl group from 10- formyltetrahydrofolate to 5-phospho-ribosyl-glycinamide (GAR), producing 5-phospho-ribosyl-N-formylglycinamide (FGAR) and tetrahydrofolate	purN	TRUE	TRUE	COG0299@1|root,COG0299@2|Bacteria,1RMHS@1236|Gammaproteobacteria,1MWN1@1224|Proteobacteria,3XMAB@561|Escherichia			F
GUT_GENOME017896_02349	1201.31	HemX, putative uroporphyrinogen-III C-methyltransferase	hemX	TRUE	TRUE	COG2959@1|root,COG2959@2|Bacteria,1RNJY@1236|Gammaproteobacteria,1MY3A@1224|Proteobacteria,3XMMF@561|Escherichia			H,R
GUT_GENOME017987_00485	1040.6	Phage major capsid protein, P2 family		TRUE	FALSE	1RPKI@1236|Gammaproteobacteria,1MUWR@1224|Proteobacteria,2CCQ9@1|root,2Z7HY@2|Bacteria,3XQM7@561|Escherichia	1857			0.904762	0
GUT_GENOME017987_03875	1349.12			TRUE	TRUE	4QFE9@10239|Viruses,4QIQQ@10662|Myoviridae,4QYP9@35237|dsDNA viruses no RNA stage,4QQZT@28883|Caudovirales	1574			0.964286	0.642857
GUT_GENOME018051_00541	867.083	Peptide chain release factor 2 directs the termination of translation in response to the peptide chain termination codons UGA and UAA	prfB	TRUE	TRUE	1MUAW@1224|Proteobacteria,1RP9Z@1236|Gammaproteobacteria,COG1186@2|Bacteria,COG1186@1|root,3XNW7@561|Escherichia			J
GUT_GENOME018051_02866	811.483	ABC transporter	fepC	TRUE	TRUE	COG1120@1|root,COG1120@2|Bacteria,1RRII@1236|Gammaproteobacteria,1MUNG@1224|Proteobacteria,3XMZN@561|Escherichia			H,P
GUT_GENOME018085_01698	1342.38	GTP-binding protein LepA C-terminus		TRUE	TRUE	COG0481@1|root,COG0481@2|Bacteria,1MVZA@1224|Proteobacteria,1RPFB@1236|Gammaproteobacteria,3XNWA@561|Escherichia			J
GUT_GENOME018085_02171	738.115	DNA polymerase III is a complex, multichain enzyme responsible for most of the replicative synthesis in bacteria. The epsilon subunit contain the editing function and is a proofreading 3'-5' exonuclease	dnaQ	TRUE	TRUE	1RNHQ@1236|Gammaproteobacteria,COG0847@2|Bacteria,COG0847@1|root,1MV8Z@1224|Proteobacteria,3XMNA@561|Escherichia			L
GUT_GENOME018107_01592	3144.67	Oxidoreductase required for the transfer of electrons from pyruvate to flavodoxin	nifJ	TRUE	TRUE	COG1013@2|Bacteria,COG1013@1|root,1MVM0@1224|Proteobacteria,COG1014@1|root,COG0674@1|root,COG0674@2|Bacteria,1RNNX@1236|Gammaproteobacteria,COG1143@2|Bacteria,COG1014@2|Bacteria,COG1143@1|root,3XMK9@561|Escherichia			C
GUT_GENOME018107_03560	1741.41	fumarate reductase, flavoprotein subunit	frdA	TRUE	TRUE	COG1053@1|root,1RMU2@1236|Gammaproteobacteria,1MU5M@1224|Proteobacteria,COG1053@2|Bacteria,3XP24@561|Escherichia			C
GUT_GENOME018170_01286	406.585	activity. During DNA replication, flap endonucleases cleave the 5'-overhanging flap structure that is generated by displacement synthesis when DNA polymerase encounters the 5'-end of a downstream Okazaki fragment	xni	TRUE	FALSE	COG0258@2|Bacteria,COG0258@1|root,1RQZE@1236|Gammaproteobacteria,1MX9Y@1224|Proteobacteria,3XNBW@561|Escherichia	330		L	1	0.666667
GUT_GENOME018207_00768	1005.52	Flagellar L-ring protein		TRUE	TRUE				N
GUT_GENOME018207_01211	1059.98	Catalyzes the NADPH-dependent reduction of 2- oxoglutarate and 2-oxobutanoate, leading to the respective 2- hydroxycarboxylate. Cannot use NADH instead of NADPH as a redox partner. Do not catalyze the reverse reactions	ybdH	TRUE	TRUE	COG0371@1|root,1RM83@1236|Gammaproteobacteria,1MWAE@1224|Proteobacteria,COG0371@2|Bacteria,3XP6W@561|Escherichia			C
GUT_GENOME018207_03048	1963.98	Belongs to the peptidase S41A family	prc	TRUE	TRUE	1MU39@1224|Proteobacteria,1RMSR@1236|Gammaproteobacteria,3XN0R@561|Escherichia,COG0793@1|root,COG0793@2|Bacteria			M,O
GUT_GENOME018238_00917	1030.73	transporter activity	yhhT	TRUE	TRUE	1RQCM@1236|Gammaproteobacteria,COG0628@1|root,1MXXU@1224|Proteobacteria,COG0628@2|Bacteria,3XP7B@561|Escherichia			R
GUT_GENOME018238_01024	463.889	TRAP transporter small permease	yiaM	TRUE	TRUE	COG3090@2|Bacteria,COG3090@1|root,1SAXN@1236|Gammaproteobacteria,1NBJ4@1224|Proteobacteria	2691		G	1	1
GUT_GENOME018238_03009	472.406	IIB component	agaB	FALSE	TRUE	1R4ES@1224|Proteobacteria,1RWA2@1236|Gammaproteobacteria,COG3444@2|Bacteria,COG3444@1|root,3XMC9@561|Escherichia			G
GUT_GENOME018346_00105	520.321	Low-potential electron donor to a number of redox enzymes	fldB	TRUE	TRUE	COG0716@2|Bacteria,1QRBW@1224|Proteobacteria,1RMED@1236|Gammaproteobacteria,COG0716@1|root,3XMVZ@561|Escherichia			C
GUT_GENOME018346_01180	832.034	Transcriptional regulatory protein, C terminal		TRUE	TRUE	3XR1B@561|Escherichia,1NI1Y@1224|Proteobacteria,1S2FD@1236|Gammaproteobacteria,COG3710@1|root,COG3710@2|Bacteria	2397		K	0.970588	1
GUT_GENOME018346_01352	1396.42	negative regulation of cell motility	yeaJ	TRUE	TRUE	COG2199@2|Bacteria,COG2199@1|root,3XMW0@561|Escherichia,1SSZV@1236|Gammaproteobacteria,1P3SE@1224|Proteobacteria			T
GUT_GENOME018390_01793	640.067	Phosphodiester glycosidase	yigE	TRUE	TRUE	3XNYD@561|Escherichia,COG3698@2|Bacteria,COG3698@1|root,1RNWS@1236|Gammaproteobacteria,1NH9S@1224|Proteobacteria
GUT_GENOME018390_03249	609.692	prohibitin homologues		FALSE	TRUE	1RQKM@1236|Gammaproteobacteria,1N5JY@1224|Proteobacteria,COG0330@2|Bacteria,COG0330@1|root,3XNCS@561|Escherichia	927		O	0.0806452	0.016129
GUT_GENOME018390_04159	504.5	Belongs to the prokaryotic molybdopterin-containing oxidoreductase family	ynfE	TRUE	TRUE	1NR6J@1224|Proteobacteria,1RMVE@1236|Gammaproteobacteria,COG0243@2|Bacteria,COG0243@1|root			C
GUT_GENOME018418_03689	837.47	Transporter of glycerol across the cytoplasmic membrane, with limited permeability to water and small uncharged compounds such as polyols	glpF	TRUE	TRUE	COG0580@1|root,1MXTJ@1224|Proteobacteria,1RP2X@1236|Gammaproteobacteria,COG0580@2|Bacteria,3XNW4@561|Escherichia			G
GUT_GENOME018470_01839	359.4	transposase activity		TRUE	TRUE	1RHBZ@1224|Proteobacteria,1S69Y@1236|Gammaproteobacteria,3XR2P@561|Escherichia,COG2963@1|root,COG2963@2|Bacteria	1162		L,X	1	1
GUT_GENOME018477_04150	267.657	50S ribosomal protein L31 type B	rpmE2	TRUE	TRUE	COG0254@2|Bacteria,COG0254@1|root,1S8V5@1236|Gammaproteobacteria,1MZ4D@1224|Proteobacteria,3XPXP@561|Escherichia	172		J	0.666667	1
GUT_GENOME018513_02146	341.822	Belongs to the UPF0482 family	ynfB	TRUE	TRUE	3XPPX@561|Escherichia,32SRB@2|Bacteria,1N0YE@1224|Proteobacteria,1S9BH@1236|Gammaproteobacteria,2CSJ8@1|root
GUT_GENOME018513_02292	671.418	DUF218 domain	ygjQ	TRUE	TRUE	1RZK7@1236|Gammaproteobacteria,COG2949@1|root,1R5Q2@1224|Proteobacteria,COG2949@2|Bacteria,3XQJ9@561|Escherichia			M
GUT_GENOME018513_02352	719.02	oxidoreductase activity	yohF	TRUE	TRUE	COG1028@1|root,COG1028@2|Bacteria,1RPFV@1236|Gammaproteobacteria,3XMUI@561|Escherichia,1Q7EW@1224|Proteobacteria			I,Q
GUT_GENOME018513_02822	561	Periplasmic protein	tbpA	TRUE	TRUE	COG4143@2|Bacteria,COG4143@1|root,3XNCI@561|Escherichia,1RMQ9@1236|Gammaproteobacteria,1MUBB@1224|Proteobacteria	2052		H,P	1	1
GUT_GENOME018513_02962	523.389	Resolvase, N terminal domain		FALSE	TRUE	COG1961@2|Bacteria,1S2PK@1236|Gammaproteobacteria,COG1961@1|root,1R482@1224|Proteobacteria	373		L	0	1
GUT_GENOME018537_03821	781.315	Uncharacterized conserved protein (DUF2303)		TRUE	TRUE	4QV9X@35237|dsDNA viruses no RNA stage,4QPMT@28883|Caudovirales,4QCC7@10239|Viruses	2505			1	1
GUT_GENOME018552_00017	2205.81	Component of the pyruvate dehydrogenase (PDH) complex, that catalyzes the overall conversion of pyruvate to acetyl-CoA and CO(2)	aceE	TRUE	TRUE	1RN6K@1236|Gammaproteobacteria,1MV21@1224|Proteobacteria,COG2609@2|Bacteria,COG2609@1|root,3XP9X@561|Escherichia			C,F
GUT_GENOME018552_00036	1030.47	Cell division protein that is involved in the assembly of the Z ring. May serve as a membrane anchor for the Z ring	ftsA	TRUE	TRUE	1MUSR@1224|Proteobacteria,1RMXY@1236|Gammaproteobacteria,COG0849@1|root,COG0849@2|Bacteria,3XNPQ@561|Escherichia			D
GUT_GENOME018552_01958	376.292	Flavoprotein (FP) subunit of succinate dehydrogenase (SDH) that is involved in complex II of the mitochondrial electron transport chain and is responsible for transferring electrons from succinate to ubiquinone (coenzyme Q)		TRUE	TRUE				C
GUT_GENOME018552_02386	1460.09	Formate dehydrogenase allows E.coli to use formate as major electron donor during anaerobic respiration, when nitrate is used as electron acceptor. The alpha subunit FdnG contains the formate oxidation site. Electrons are transferred from formate to menaquinone in the gamma subunit (FdnI), through the 4Fe-4S clusters in the beta subunit (FdnH). Formate dehydrogenase-N is part of a system that gen…	fdnG	TRUE	TRUE	COG0243@1|root,COG0243@2|Bacteria,1RN6N@1236|Gammaproteobacteria,COG3383@2|Bacteria,1MW3N@1224|Proteobacteria,COG3383@1|root,3XM6Z@561|Escherichia			C,R
GUT_GENOME018696_02959	724.217	Depending on the conditions (growth phase and medium), acts as a positive or negative regulator of gadA and gadBC. Repression occurs directly or via the repression of the expression of gadX. Activation occurs directly by the binding of GadW to the gadA and gadBC promoters	gadW	TRUE	TRUE	1QIIZ@1224|Proteobacteria,1TGDT@1236|Gammaproteobacteria,3XQQ1@561|Escherichia,COG2207@2|Bacteria,COG2207@1|root			K
GUT_GENOME018713_00012	1880.1	Acts as a processive, ATP-dependent zinc metallopeptidase for both cytoplasmic and membrane proteins. Plays a role in the quality control of integral membrane proteins	ftsH	TRUE	TRUE	COG0465@1|root,1RME8@1236|Gammaproteobacteria,1MU6J@1224|Proteobacteria,COG0465@2|Bacteria,3XMUM@561|Escherichia			O
GUT_GENOME018713_00467	965.354	Binds and hydrolyzes GTP. Likely functions as a G-protein chaperone that assists AdoCbl cofactor delivery to the methylmalonyl-CoA mutase (MCM) ScpA and reactivation of the enzyme during catalysis	argK	TRUE	TRUE	1RP15@1236|Gammaproteobacteria,COG1703@1|root,COG1703@2|Bacteria,1MVI0@1224|Proteobacteria,3XP3F@561|Escherichia	2685		E,O	0.666667	0.666667
GUT_GENOME018713_02248	529.92	Catalyzes the decarboxylation of 3-keto-L-gulonate-6-P into L-xylulose-5-P. Is involved in the anaerobic L-ascorbate utilization	ulaD	FALSE	TRUE	COG0269@2|Bacteria,COG0269@1|root,3XM54@561|Escherichia,1RPV5@1236|Gammaproteobacteria,1QWE4@1224|Proteobacteria	2164		F,G	0	0.333333
GUT_GENOME018728_01406	460.758	Transcriptional regulator		TRUE	FALSE	1S8KW@1236|Gammaproteobacteria,1RGZX@1224|Proteobacteria,COG1309@1|root,COG1309@2|Bacteria	1322		K	1	0
GUT_GENOME018728_03427	1110.31	Part of the ABC transporter complex PotABCD involved in spermidine putrescine import. Responsible for energy coupling to the transport system	potG	TRUE	TRUE	COG3842@1|root,1MU3I@1224|Proteobacteria,1RNPX@1236|Gammaproteobacteria,COG3842@2|Bacteria			E,P
GUT_GENOME018728_03917	914.332			TRUE	TRUE	2Z7QA@2|Bacteria,28HDR@1|root,1RZ54@1236|Gammaproteobacteria,1PXQ9@1224|Proteobacteria	489			0.964286	0.892857
GUT_GENOME018871_02854	255			FALSE	TRUE	1NYKB@1224|Proteobacteria,1SR1H@1236|Gammaproteobacteria,2F6ZN@1|root,33ZFJ@2|Bacteria	2627			0	1
GUT_GENOME019020_01820	838.834	Catalyzes the NAD(P)H-dependent reduction of pyridoxal to pyridoxine in vitro. Is not able to reduce 4-pyridoxate, and to oxidize pyridoxine or pyridoxamine. Has Kemp eliminase activity towards the non-physiological substrate 5- nitrobenzisoxazole, producing 4-nitro-2-cyanophenol	ydbC	FALSE	TRUE	1MWGZ@1224|Proteobacteria,COG0667@2|Bacteria,COG0667@1|root,3XN0D@561|Escherichia,1RRHM@1236|Gammaproteobacteria			C,H,R
GUT_GENOME019020_02915	1331.41	Aldehyde dehydrogenase family	gabD	TRUE	TRUE	1MU1V@1224|Proteobacteria,1RMBQ@1236|Gammaproteobacteria,COG1012@2|Bacteria,COG1012@1|root,3XN8N@561|Escherichia			C,I
GUT_GENOME019096_01426	392.752	Belongs to the Nudix hydrolase family	mutT	TRUE	TRUE	1RCZM@1224|Proteobacteria,1RS3S@1236|Gammaproteobacteria,COG0494@1|root,COG0494@2|Bacteria,3XPPA@561|Escherichia			L,V
GUT_GENOME019096_02129	863.33	N-acetylmuramoyl-L-alanine amidase amiA	amiA	TRUE	TRUE	1RMQR@1236|Gammaproteobacteria,COG0860@2|Bacteria,3XMRY@561|Escherichia,COG0860@1|root,1MUQK@1224|Proteobacteria			M
GUT_GENOME019224_02477	1196.41	Uptake of xanthosine. Driven by a proton motive force. Can also transport other nucleosides such as inosine, adenosine, cytidine, uridine and thymidine	xapB	TRUE	FALSE	1RMU5@1236|Gammaproteobacteria,COG2211@2|Bacteria,1MWI9@1224|Proteobacteria,COG2211@1|root,3XP72@561|Escherichia	1885		G	1	0
GUT_GENOME019236_01186	715.211	Phosphonate ABC transporter	phnE	TRUE	TRUE	COG3639@2|Bacteria,COG3639@1|root,1MW4F@1224|Proteobacteria,1RQ3V@1236|Gammaproteobacteria			P
GUT_GENOME020399_00867	285	Catalyzes the isomerization of L-ribulose 5-phosphate to D-xylulose 5-phosphate. Is involved in the anaerobic L-ascorbate utilization	ulaF	TRUE	TRUE	COG0235@2|Bacteria,COG0235@1|root,3XM68@561|Escherichia,1RMIP@1236|Gammaproteobacteria,1MU54@1224|Proteobacteria	2442		E,G	1	1
GUT_GENOME020399_01693	500.002	Modulates RecA activity through direct physical interaction. Can inhibit both RecA recombinase and coprotease activities. May have a regulatory role during the SOS response. Inhibits DNA strand exchange in vitro	recX	TRUE	TRUE	1N6P6@1224|Proteobacteria,COG2137@2|Bacteria,1SCMF@1236|Gammaproteobacteria,COG2137@1|root,3XMI0@561|Escherichia			O
GUT_GENOME020399_01895	974.448	Key enzyme for ketone body catabolism. Transfers the CoA moiety from succinate to acetoacetate. Formation of the enzyme-CoA intermediate proceeds via an unstable anhydride species formed between the carboxylate groups of the enzyme and substrate		TRUE	TRUE	COG2057@1|root	1120		I	1	1
GUT_GENOME020399_03133	424.5	Glycerol-3-phosphate dehydrogenase	gpsA	TRUE	FALSE	1MUU3@1224|Proteobacteria,COG0240@2|Bacteria,COG0240@1|root,3XNWW@561|Escherichia,1RPQ7@1236|Gammaproteobacteria			C,I
GUT_GENOME020429_00076	1461.54	Part of the ABC transporter complex XylFGH involved in xylose import. Responsible for energy coupling to the transport system	xylG	TRUE	TRUE	COG1129@1|root,1RMCH@1236|Gammaproteobacteria,1MU22@1224|Proteobacteria,COG1129@2|Bacteria,3XPAB@561|Escherichia			G
GUT_GENOME021245_02929	341.542	Protein of unknown function (DUF2511)	yebY	TRUE	TRUE	1N3F9@1224|Proteobacteria,3XPPC@561|Escherichia,32TXR@2|Bacteria,2DMVD@1|root,1SAPJ@1236|Gammaproteobacteria
GUT_GENOME021245_03402	801.905	L,D-transpeptidase catalytic domain	erfK	FALSE	TRUE	COG2801@2|Bacteria,COG2801@1|root,1MVN5@1224|Proteobacteria,3X3JC@547|Enterobacter,1RR8F@1236|Gammaproteobacteria,COG2963@1|root,COG2963@2|Bacteria			L,X
GUT_GENOME022097_00578	436.655	4 iron, 4 sulfur cluster binding	yjjW	FALSE	TRUE	1QIC8@1224|Proteobacteria,1RRCB@1236|Gammaproteobacteria,3XPBI@561|Escherichia,COG1180@1|root,COG1180@2|Bacteria	2050		O	0	1
GUT_GENOME022097_00810	1155.85	Multidrug resistance protein MdtL	mdtL	TRUE	TRUE	1T1SC@1236|Gammaproteobacteria,1P8JD@1224|Proteobacteria,COG2814@2|Bacteria,COG0477@1|root,3XMTT@561|Escherichia			E,G,P,R
GUT_GENOME022097_02634	295.831	oxidoreductase activity, acting on the CH-NH2 group of donors, NAD or NADP as acceptor	gltD	FALSE	TRUE	1RMY7@1236|Gammaproteobacteria,1MU2H@1224|Proteobacteria,3XNDT@561|Escherichia,COG0493@1|root,COG1142@2|Bacteria,COG1142@1|root,COG0493@2|Bacteria			C,E,R
GUT_GENOME022209_02171	1042.3	transmembrane transport	yihN	FALSE	TRUE	1RW4G@1236|Gammaproteobacteria,COG1082@2|Bacteria,COG1082@1|root,1MY5W@1224|Proteobacteria,3XQ67@561|Escherichia	2672		G	0	1
GUT_GENOME022209_03273	296.755	ParE toxin of type II toxin-antitoxin system, parDE		TRUE	FALSE	COG3668@1|root,COG3668@2|Bacteria,3ZNCN@590|Salmonella,1SG0Y@1236|Gammaproteobacteria,1QN9Z@1224|Proteobacteria	2553		X	1	0
GUT_GENOME022238_00535	447.659		yidI	TRUE	TRUE	1RHWJ@1224|Proteobacteria,31ZXV@2|Bacteria,2B6XT@1|root,1S6BM@1236|Gammaproteobacteria,3XPNI@561|Escherichia	2630			1	1
GUT_GENOME022238_01235	478.103	Belongs to the ompA family	yfiB	TRUE	TRUE	1RJ05@1224|Proteobacteria,3XNC2@561|Escherichia,COG2885@1|root,COG2885@2|Bacteria,1S695@1236|Gammaproteobacteria			M
GUT_GENOME022238_03832	389.618	GntP family permease	gntP	TRUE	FALSE	COG2610@2|Bacteria,1RZUF@1236|Gammaproteobacteria,3WXY2@544|Citrobacter,COG2610@1|root,1MVK2@1224|Proteobacteria	1805		E,G	1	0
GUT_GENOME022238_04048	232.655	3-demethylubiquinone-9 3-methyltransferase	phnB	TRUE	FALSE	COG2764@1|root,3XM9N@561|Escherichia,1N0S4@1224|Proteobacteria,COG2764@2|Bacteria,1S93U@1236|Gammaproteobacteria	1628		C	1	0
GUT_GENOME022362_02508	910.076	Acts as a processive, ATP-dependent zinc metallopeptidase for both cytoplasmic and membrane proteins. Plays a role in the quality control of integral membrane proteins	ftsH	FALSE	TRUE	COG0465@1|root,COG0465@2|Bacteria,1RME8@1236|Gammaproteobacteria,1MU6J@1224|Proteobacteria,3XMUM@561|Escherichia	650		O	0	1
GUT_GENOME022362_02935	335.873	GlpM protein	ydgC	TRUE	TRUE	1S69X@1236|Gammaproteobacteria,1RH8C@1224|Proteobacteria,COG3136@2|Bacteria,COG3136@1|root,3XPPD@561|Escherichia
GUT_GENOME022415_02265	645.228	Catalyzes the reversible formation of fructose 6- phosphate from dihydroxyacetone and D-glyceraldehyde 3-phosphate via an aldolization reaction	fsaB	TRUE	TRUE	COG0176@2|Bacteria,3XQP0@561|Escherichia,1RNWN@1236|Gammaproteobacteria,1MWQ8@1224|Proteobacteria,COG0176@1|root			G
GUT_GENOME022510_00545	1139.07	Pore-forming subunit of a potassium efflux system that confers protection against electrophiles. Catalyzes K( ) H( ) antiport	kefC	TRUE	TRUE	COG0475@1|root,COG1226@2|Bacteria,COG1226@1|root,3XN4I@561|Escherichia,COG0475@2|Bacteria,1RNVR@1236|Gammaproteobacteria,1MV34@1224|Proteobacteria			P
GUT_GENOME022510_00636	1087.13	Sensor protein basS	basS	TRUE	TRUE	COG0642@2|Bacteria,COG0642@1|root,1RQMH@1236|Gammaproteobacteria,1QTSX@1224|Proteobacteria			T
GUT_GENOME022510_03005	721.819	Catalyzes cross-linking of the peptidoglycan cell wall	mrdA	TRUE	FALSE	1MV8C@1224|Proteobacteria,1RN9H@1236|Gammaproteobacteria,COG0768@1|root,COG0768@2|Bacteria,3XNHA@561|Escherichia	1435		D,M	1	0
GUT_GENOME022725_00431	204			TRUE	TRUE		1968			1	1
GUT_GENOME022725_00533	1712.51	ABC transporter transmembrane region		TRUE	TRUE	COG1132@1|root,COG1132@2|Bacteria,1RMUR@1236|Gammaproteobacteria,1MUBM@1224|Proteobacteria			P,V
GUT_GENOME022725_01461	388.778			TRUE	FALSE		2519			0.25	0
GUT_GENOME022725_01751	819.515	Porin thermoregulatory protein envY		TRUE	TRUE	COG2207@1|root,COG2207@2|Bacteria,3XQ8H@561|Escherichia,1TGAB@1236|Gammaproteobacteria,1QIG0@1224|Proteobacteria			K
GUT_GENOME022725_02496	341.45	transmembrane transport	ybhS	TRUE	TRUE	COG0842@2|Bacteria,COG0842@1|root,1MW5R@1224|Proteobacteria,1RPB4@1236|Gammaproteobacteria,3XPH4@561|Escherichia			V
GUT_GENOME022810_01644	1308.32	Inner membrane protein CreD	creD	TRUE	TRUE	COG4452@1|root,1RQRZ@1236|Gammaproteobacteria,COG4452@2|Bacteria,1MVVR@1224|Proteobacteria,3XMF1@561|Escherichia			V
GUT_GENOME022880_00257	724.798	Lipoprotein	prgK	FALSE	TRUE	1RA14@1224|Proteobacteria,1S32N@1236|Gammaproteobacteria,COG4669@2|Bacteria,COG4669@1|root	2677		M,U	0.363636	0.727273
GUT_GENOME022880_02150	652.874	Carboxysome structural protein involved in ethanolamine utilization	eutL	TRUE	TRUE	COG4816@2|Bacteria,1RSFT@1236|Gammaproteobacteria,1QGJB@1224|Proteobacteria,COG4816@1|root,3XQBK@561|Escherichia			E
GUT_GENOME022880_02917	3462.57	Oxidizes proline to glutamate for use as a carbon and nitrogen source	putA	TRUE	TRUE	COG4230@2|Bacteria,1RN48@1236|Gammaproteobacteria,3XMSS@561|Escherichia,COG3905@2|Bacteria,COG0506@1|root,COG4230@1|root,COG3905@1|root,COG0506@2|Bacteria,1MV93@1224|Proteobacteria			E,K
GUT_GENOME022880_02994	2928.46	Carbamoyl-phosphate synthetase ammonia chain	carB	TRUE	TRUE	1RPIU@1236|Gammaproteobacteria,COG0458@2|Bacteria,1MUDZ@1224|Proteobacteria,COG0458@1|root,3XMVN@561|Escherichia			E,F
GUT_GENOME022880_03885	794.171	Catalyzes the phosphorylation of heptose(I) of the outer membrane lipopolysaccharide core	rfaP	TRUE	TRUE	1MXX9@1224|Proteobacteria,1RQFJ@1236|Gammaproteobacteria,COG0515@1|root,COG0515@2|Bacteria,3XMKG@561|Escherichia	275		F,T	1	1
GUT_GENOME022950_02630	408.958	HicB_like antitoxin of bacterial toxin-antitoxin system		FALSE	TRUE	COG1598@2|Bacteria,COG1598@1|root,1S859@1236|Gammaproteobacteria,1RKF9@1224|Proteobacteria,4036I@613|Serratia	37		K,V	0	0.945946
GUT_GENOME022950_03475	260.975	Inhibits RpoS proteolysis by regulating RssB activity, thereby increasing the stability of the sigma stress factor RpoS especially during phosphate starvation, but also in stationary phase and during nitrogen starvation. Its effect on RpoS stability is due to its interaction with RssB, which probably blocks the interaction of RssB with RpoS, and the consequent delivery of the RssB-RpoS complex to…	iraP	TRUE	TRUE	2CMK9@1|root,3XPWF@561|Escherichia,1SB6X@1236|Gammaproteobacteria,1N3ZW@1224|Proteobacteria,32SF1@2|Bacteria			J
GUT_GENOME023332_00970	1305.36	DEAD-box RNA helicase involved in the assembly of the 50S ribosomal subunit at low temperature. Exhibits RNA-stimulated ATP hydrolysis and RNA unwinding activity	srmB	TRUE	TRUE	1RMWA@1236|Gammaproteobacteria,COG0513@2|Bacteria,1MU49@1224|Proteobacteria,COG0513@1|root,3XNKW@561|Escherichia			F,L
GUT_GENOME023332_01883	435.581	Involved in the catabolism of short chain fatty acids (SCFA) via the tricarboxylic acid (TCA)(acetyl degradation route) and via the 2-methylcitrate cycle I (propionate degradation route). Catalyzes the Claisen condensation of propionyl-CoA and oxaloacetate (OAA) to yield (2S,3S)-2-methylcitrate (2-MC) and CoA. Also catalyzes the condensation of oxaloacetate with acetyl- CoA to yield citrate but w…	prpC	FALSE	TRUE	3XME6@561|Escherichia,1RNT1@1236|Gammaproteobacteria,1MUKX@1224|Proteobacteria,COG0372@1|root,COG0372@2|Bacteria	465		C	0	1
GUT_GENOME023332_02889	414.857	Involved in the catabolism of short chain fatty acids (SCFA) via the tricarboxylic acid (TCA)(acetyl degradation route) and via the 2-methylcitrate cycle I (propionate degradation route). Catalyzes the stereospecific dehydration of (2S,3S)-2- methylcitrate (2-MC) to yield the cis isomer of 2-methyl- aconitate	prpD	FALSE	TRUE	1MUIG@1224|Proteobacteria,COG2079@1|root,3XNFN@561|Escherichia,1RPQN@1236|Gammaproteobacteria,COG2079@2|Bacteria	1993		G	0	1
GUT_GENOME023545_02003	804.51	The phosphoenolpyruvate-dependent sugar phosphotransferase system (PTS), a major carbohydrate active -transport system, catalyzes the phosphorylation of incoming sugar substrates concomitant with their translocation across the cell membrane	frwC	TRUE	TRUE	COG1299@2|Bacteria,COG1299@1|root,3XNJ3@561|Escherichia,1RPQZ@1236|Gammaproteobacteria,1P0NB@1224|Proteobacteria			G
GUT_GENOME023633_02265	776.24	Activator of the mhpABCDFE operon coding for components of the 3-hydroxyphenylpropionate degradation pathway	mhpR	TRUE	TRUE	COG1414@2|Bacteria,COG1414@1|root,3XQG0@561|Escherichia,1RYF9@1236|Gammaproteobacteria,1QRZN@1224|Proteobacteria	2682		K	1	0.857143
GUT_GENOME023780_00701	229.5	Protein of unknown function (DUF1482)		TRUE	TRUE	3XR7I@561|Escherichia,33BAK@2|Bacteria,1SHDX@1236|Gammaproteobacteria,2EHIM@1|root,1NIY5@1224|Proteobacteria	2211			1	1
GUT_GENOME023780_01525	1318.54	Metalloprotease involved in CcdA degradation. Suppresses the inhibitory activity of the carbon storage regulator (CsrA)	pmbA	TRUE	TRUE	1MUVW@1224|Proteobacteria,COG0312@2|Bacteria,COG0312@1|root,1RPJF@1236|Gammaproteobacteria,3XMDW@561|Escherichia			R
GUT_GENOME023780_01906	599.334	nucleic acid-templated transcription	yhjB	TRUE	TRUE	COG2197@2|Bacteria,COG2197@1|root,1S15H@1236|Gammaproteobacteria,1NRJH@1224|Proteobacteria,3XNTW@561|Escherichia			K,T
GUT_GENOME023858_00109	792.099	transcriptional regulator	ygeV	FALSE	TRUE	1RMHY@1236|Gammaproteobacteria,1NU8B@1224|Proteobacteria,COG3829@1|root,3XN69@561|Escherichia,COG3829@2|Bacteria	1889		K,T	0.5	0.5
GUT_GENOME023858_00539	2777.73	Phage tail tape measure protein, TP901 family		TRUE	FALSE	1NFKU@1224|Proteobacteria,1RP2D@1236|Gammaproteobacteria,COG5283@2|Bacteria,COG5283@1|root,3XQPK@561|Escherichia	1857		X	0.904762	0
GUT_GENOME024371_00541	572.495	Enterobacterial Ail/Lom protein		TRUE	TRUE	COG3637@1|root,1RH8M@1224|Proteobacteria,COG3637@2|Bacteria,1SE1S@1236|Gammaproteobacteria,3XRK1@561|Escherichia	2219		M	1	1
GUT_GENOME025122_02263	430.65	response to ionizing radiation	yhgF	TRUE	FALSE	COG2183@2|Bacteria,COG2183@1|root,3XMBH@561|Escherichia,1RMNH@1236|Gammaproteobacteria,1MUA7@1224|Proteobacteria			K
GUT_GENOME025216_00355	585	Binds the cellulose synthase activator, bis-(3'-5') cyclic diguanylic acid (c-di-GMP)	bcsB	TRUE	TRUE	COG1215@2|Bacteria,COG1215@1|root,3XNAD@561|Escherichia,1RPJ6@1236|Gammaproteobacteria,1MWF8@1224|Proteobacteria	225		M,N	1	1
GUT_GENOME025216_00780	1702.51	RNA secondary structure unwinding	yejH	TRUE	TRUE	1MV9F@1224|Proteobacteria,1RNAN@1236|Gammaproteobacteria,COG1061@1|root,COG1061@2|Bacteria,3XN4B@561|Escherichia	1959		K,L	0.666667	1
GUT_GENOME025216_01450	620.726	transcriptional regulator	yqjI	TRUE	TRUE	COG1695@1|root,1RHSE@1224|Proteobacteria,1S255@1236|Gammaproteobacteria,3XNX9@561|Escherichia,COG1695@2|Bacteria			K
GUT_GENOME025216_01669	841.607	Catalyzes the phosphorylation of the position 2 hydroxy group of 4-diphosphocytidyl-2C-methyl-D-erythritol	ispE	TRUE	TRUE	COG1947@2|Bacteria,COG1947@1|root,1RP23@1236|Gammaproteobacteria,1MVU3@1224|Proteobacteria,3XN5B@561|Escherichia			F,I
GUT_GENOME025216_01900	868.944	Mg2 and Co2 transporter CorC	corC	TRUE	TRUE	COG4535@2|Bacteria,COG4535@1|root,1RMKX@1236|Gammaproteobacteria,1QTU8@1224|Proteobacteria			P
GUT_GENOME025548_00503	1173.7	General secretion pathway	gspF	TRUE	TRUE	3XN4J@561|Escherichia,COG1459@2|Bacteria,COG1459@1|root,1MV4U@1224|Proteobacteria,1RQ86@1236|Gammaproteobacteria	123		N,U,W	1	1
GUT_GENOME025708_01820	738.968	Has low ATPase activity. The SufBCD complex acts synergistically with SufE to stimulate the cysteine desulfurase activity of SufS. The SufBCD complex contributes to the assembly or repair of oxygen-labile iron-sulfur clusters under oxidative stress. May facilitate iron uptake from extracellular iron chelators under iron limitation	sufC	TRUE	TRUE	COG0396@2|Bacteria,COG0396@1|root,1RPFE@1236|Gammaproteobacteria,3XNS8@561|Escherichia,1MUGK@1224|Proteobacteria			O,P
GUT_GENOME025708_01965	284.998	This protein is one of the two subunits of integration host factor, a specific DNA-binding protein that functions in genetic recombination as well as in transcriptional and translational control	himD	TRUE	TRUE	COG0776@2|Bacteria,COG0776@1|root,1S8XZ@1236|Gammaproteobacteria,1MZ7M@1224|Proteobacteria,3XPWM@561|Escherichia			K,L
GUT_GENOME025708_02800	855.486	aldose 1-epimerase activity	yphB	TRUE	TRUE	1S03U@1236|Gammaproteobacteria,COG2017@2|Bacteria,1RAQE@1224|Proteobacteria,COG2017@1|root,3XP7P@561|Escherichia			G
GUT_GENOME025708_03129	376.243	Endonuclease/Exonuclease/phosphatase family	ybhP	TRUE	TRUE	1MVN7@1224|Proteobacteria,1RNSP@1236|Gammaproteobacteria,3XNI0@561|Escherichia,COG3568@1|root,COG3568@2|Bacteria	1949		L,R	1	1
GUT_GENOME025756_03501	302			TRUE	TRUE	1NICF@1224|Proteobacteria,1SHXE@1236|Gammaproteobacteria,2EUTS@1|root,33N9B@2|Bacteria,3XR9P@561|Escherichia
GUT_GENOME025811_00919	450	Activation of pyruvate formate-lyase 2 under anaerobic conditions by generation of an organic free radical, using S- adenosylmethionine and reduced flavodoxin as cosubstrates to produce 5'-deoxy-adenosine	pflC	TRUE	TRUE	3XN6N@561|Escherichia,COG1180@1|root,COG1180@2|Bacteria,1RQG5@1236|Gammaproteobacteria,1PD9E@1224|Proteobacteria	2594		O	1	1
GUT_GENOME025811_02547	967.084	Belongs to the nitrite and sulfite reductase 4Fe-4S domain family	nirB	TRUE	FALSE	COG1251@1|root,3XM6G@561|Escherichia,1RNGY@1236|Gammaproteobacteria,1MW58@1224|Proteobacteria,COG1251@2|Bacteria	439		C	1	0
GUT_GENOME025811_02756	375	Low-affinity inorganic phosphate transport. Can also transport arsenate	pitA	FALSE	TRUE	1MVXK@1224|Proteobacteria,1RP0Q@1236|Gammaproteobacteria,3XMW3@561|Escherichia,COG0306@2|Bacteria,COG0306@1|root			P
GUT_GENOME025811_02907	641.811	May play a specific role in the degradation of signal peptides after they are released from precursor forms of secreted proteins. Can cleave N-acetyl-L-Ala(4)	prlC	TRUE	FALSE	COG0339@2|Bacteria,COG0339@1|root,1RMAH@1236|Gammaproteobacteria,1MU1K@1224|Proteobacteria,3XNTT@561|Escherichia	1988		E,O	1	0
GUT_GENOME025882_04179	1010.73	DNA integration		TRUE	FALSE	4QI35@10662|Myoviridae,4QPDM@28883|Caudovirales,4QUYF@35237|dsDNA viruses no RNA stage,4QAQE@10239|Viruses
GUT_GENOME026027_01268	472.345	Catalyzes the phosphorylation of L-xylulose and 3-keto- L-gulonate. Is involved in L-lyxose utilization via xylulose, and may also be involved in the utilization of 2,3-diketo-L-gulonate	lyx	TRUE	TRUE	COG1070@2|Bacteria,COG1070@1|root,3XP88@561|Escherichia,1RP2G@1236|Gammaproteobacteria,1MWS5@1224|Proteobacteria	1942		G	1	1
GUT_GENOME026027_02585	421.05	Belongs to the aldehyde dehydrogenase family	aldB	FALSE	TRUE	COG1012@2|Bacteria,COG1012@1|root,3XMIY@561|Escherichia,1RMBQ@1236|Gammaproteobacteria,1MU1V@1224|Proteobacteria			C,I
GUT_GENOME026027_02711	454.929	Part of the phosphate (Pho) regulon, which plays a key role in phosphate homeostasis. PhoU is essential for the repression of the Pho regulon at high phosphate conditions	phoU	TRUE	TRUE	COG0704@2|Bacteria,COG0704@1|root,3XNJ8@561|Escherichia,1RMW5@1236|Gammaproteobacteria,1MUMI@1224|Proteobacteria	1452		P	1	1
GUT_GENOME026097_02811	225.002	Protein of unknown function (DUF2594)	yecF	TRUE	TRUE	1N71V@1224|Proteobacteria,1SCS7@1236|Gammaproteobacteria,2E5U3@1|root,330IE@2|Bacteria,3XPZQ@561|Escherichia
GUT_GENOME026097_03350	248	ADP-glyceromanno-heptose 6-epimerase activity		TRUE	FALSE
GUT_GENOME026097_03976	334.8			TRUE	TRUE
GUT_GENOME026556_01643	342.6			TRUE	TRUE	2EN22@1|root,33FQ8@2|Bacteria,1NN3V@1224|Proteobacteria,1SPZD@1236|Gammaproteobacteria
GUT_GENOME026556_01653	794.786	BtpA family	sgcQ	FALSE	TRUE	COG0434@1|root,1Q83B@1224|Proteobacteria,1RYMH@1236|Gammaproteobacteria,COG0434@2|Bacteria	418		M	0	1
GUT_GENOME026556_01896	774.91	efficiency is maximal in the presence of the beta sliding-clamp and clamp-loading complex of DNA polymerase III plus single-stranded binding protein (SSB). RecA and to a lesser extent the beta clamp- complex may target Pol V to replication complexes stalled at DNA template lesions	umuC	TRUE	TRUE	COG0389@2|Bacteria,1RMT1@1236|Gammaproteobacteria,1MUUH@1224|Proteobacteria,COG0389@1|root,3XQ8B@561|Escherichia			L
GUT_GENOME026556_02201	392.937	cellular response to cadmium ion	ygiW	TRUE	TRUE	COG3111@2|Bacteria,1SCD7@1236|Gammaproteobacteria,COG3111@1|root,1N9HJ@1224|Proteobacteria,3XPMM@561|Escherichia
GUT_GENOME026683_01392	714	Transcriptional regulatory protein, C terminal	arcA	TRUE	TRUE	1RPU3@1236|Gammaproteobacteria,COG0745@1|root,COG0745@2|Bacteria,1MWJG@1224|Proteobacteria,3WVSN@544|Citrobacter			K,T
GUT_GENOME026683_03549	211.136	response to butan-1-ol	yibT	TRUE	TRUE	32Z93@2|Bacteria,2E4DS@1|root,1SD4V@1236|Gammaproteobacteria,1N93Z@1224|Proteobacteria,3XQ0F@561|Escherichia	1409			0.8	0.8
GUT_GENOME026746_01466	249.115	Involved in the assembly process of the P-ring formation. It may associate with FlgF on the rod constituting a structure essential for the P-ring assembly or may act as a modulator protein for the P-ring assembly	flgA	TRUE	TRUE	1RMY1@1236|Gammaproteobacteria,1NY6E@1224|Proteobacteria,COG1261@2|Bacteria,COG1261@1|root,3XN09@561|Escherichia	1944		N	1	1
GUT_GENOME026746_02075	1008.49	nadp-dependent	yncB	TRUE	TRUE	1RNGM@1236|Gammaproteobacteria,COG2130@2|Bacteria,COG2130@1|root,1MUC2@1224|Proteobacteria,3XNV4@561|Escherichia	2687		Q,R	1	1
GUT_GENOME026746_02208	1091.18	toxin catabolic process	ycbX	TRUE	TRUE	COG3217@2|Bacteria,1MXN2@1224|Proteobacteria,1RMN7@1236|Gammaproteobacteria,COG0633@2|Bacteria,COG3217@1|root,COG0633@1|root,3XM6S@561|Escherichia			C,F,V
GUT_GENOME026746_02414	847.267	COG0790 FOG TPR repeat, SEL1 subfamily	ybeQ	FALSE	TRUE	COG0790@1|root,COG0790@2|Bacteria,1MWPA@1224|Proteobacteria,1RPI3@1236|Gammaproteobacteria	2556		O,R	0	1
GUT_GENOME026746_03113	447.443	Modulator of drug activity B	mdaB	TRUE	TRUE	COG2249@2|Bacteria,1RQ16@1236|Gammaproteobacteria,1MWV9@1224|Proteobacteria,COG2249@1|root,3XP9N@561|Escherichia			R
GUT_GENOME026746_03199	243	Inhibits DNA replication at both initiation and elongation steps, most probably by binding to the opened, single- stranded regions at replication forks. Plays a regulatory role in chromosomal replication in nutrient-depleted cells	cspD	TRUE	TRUE	1N6Q5@1224|Proteobacteria,1SCA7@1236|Gammaproteobacteria,3XPZU@561|Escherichia,COG1278@1|root,COG1278@2|Bacteria			K
GUT_GENOME027261_01249	1276.89	Major facilitator superfamily	exuT_1	TRUE	TRUE	1MV04@1224|Proteobacteria,1RP70@1236|Gammaproteobacteria,COG2271@1|root,COG2271@2|Bacteria,3ZMXC@590|Salmonella	1326		G,P	1	1
GUT_GENOME027267_04348	1070.91	Membrane		TRUE	TRUE	COG4325@2|Bacteria,COG4325@1|root,1RNYZ@1236|Gammaproteobacteria,1MXTM@1224|Proteobacteria	1165			1	1
GUT_GENOME027341_04427	417.079	Bacterial protein of unknown function (DUF977)		FALSE	TRUE	29XZ3@1|root,30JRR@2|Bacteria,1S3VY@1236|Gammaproteobacteria,1RD4K@1224|Proteobacteria,3XQB1@561|Escherichia	2180			0	1
GUT_GENOME027350_00603	1213.18	Tryptophan-specific transport protein	mtr	TRUE	TRUE	1MWGI@1224|Proteobacteria,COG0814@1|root,COG0814@2|Bacteria,1RMME@1236|Gammaproteobacteria,3XMR8@561|Escherichia			E
GUT_GENOME027350_01155	1446.77	Catalyzes the addition of meso-diaminopimelic acid to the nucleotide precursor UDP-N-acetylmuramoyl-L-alanyl-D-glutamate (UMAG) in the biosynthesis of bacterial cell-wall peptidoglycan	murE	TRUE	TRUE	COG0769@1|root,1MU6P@1224|Proteobacteria,COG0769@2|Bacteria,1RMD6@1236|Gammaproteobacteria,3XNJS@561|Escherichia			M
GUT_GENOME027350_01162	1052.33	Cell wall formation. Catalyzes the transfer of a GlcNAc subunit on undecaprenyl-pyrophosphoryl-MurNAc-pentapeptide (lipid intermediate I) to form undecaprenyl-pyrophosphoryl-MurNAc- (pentapeptide)GlcNAc (lipid intermediate II)	murG	TRUE	TRUE	COG0707@1|root,1MVIB@1224|Proteobacteria,1RMQ3@1236|Gammaproteobacteria,COG0707@2|Bacteria,3XNRS@561|Escherichia			M
GUT_GENOME027350_01335	2041.56	Tyrosine-protein kinase	wzc	TRUE	TRUE	COG0489@2|Bacteria,COG3206@2|Bacteria,COG3206@1|root,COG0489@1|root,1RNB0@1236|Gammaproteobacteria,1MVI9@1224|Proteobacteria,3XN7H@561|Escherichia	276		D,M	1	1
GUT_GENOME027350_01404	279.109	acylphosphatase activity	acyP	TRUE	TRUE	1N6NU@1224|Proteobacteria,COG1254@2|Bacteria,COG1254@1|root,1SCPF@1236|Gammaproteobacteria,3XPZE@561|Escherichia			C
GUT_GENOME027350_02410	728.111	Part of the ABC transporter complex GltIJKL involved in glutamate and aspartate uptake. Probably responsible for the translocation of the substrate across the membrane	gltJ	TRUE	TRUE	COG0765@1|root,COG0765@2|Bacteria,1RMTK@1236|Gammaproteobacteria,1MUVX@1224|Proteobacteria,3XN5Z@561|Escherichia			E,P
GUT_GENOME027350_02454	991.403	sugar efflux transporter	setB	TRUE	TRUE	COG0697@2|Bacteria,3XNDX@561|Escherichia,1NHTP@1224|Proteobacteria,COG0697@1|root,1RR5J@1236|Gammaproteobacteria			E,G,R
GUT_GENOME027350_02709	1983.36	Catalyzes the reversible transfer of the terminal phosphate of ATP to form a long-chain polyphosphate (polyP)	ppk	TRUE	TRUE	COG0855@2|Bacteria,COG0855@1|root,1MUM3@1224|Proteobacteria,1RNRX@1236|Gammaproteobacteria,3XN1S@561|Escherichia			F,P
GUT_GENOME027350_03104	358.171	Involved in the biosynthesis of the siderophore enterobactin (enterochelin), which is a macrocyclic trimeric lactone of N-(2,3-dihydroxybenzoyl)-serine. The serine trilactone serves as a scaffolding for the three catechol functionalities that provide hexadentate coordination for the tightly ligated iron(2 ) atoms. EntE proccesses via a two-step adenylation- ligation reaction (bi-uni-uni-bi ping-p…	entE	TRUE	TRUE	1NSN8@1224|Proteobacteria,1RP8K@1236|Gammaproteobacteria,COG1021@1|root,COG1021@2|Bacteria,3XMDK@561|Escherichia	61		Q	1	1
GUT_GENOME027356_00613	1230.74	ion-transport protein YfeO	yfeO	TRUE	TRUE	1MUBJ@1224|Proteobacteria,1RR1R@1236|Gammaproteobacteria,COG0038@1|root,COG0038@2|Bacteria,3XM3B@561|Escherichia			P
GUT_GENOME027387_00923	1049.63	Catalyzes the NAD(P)H-dependent reduction of 2- oxoglutarate, phenylpyruvate and (4-hydroxyphenyl)pyruvate, leading to the respective 2-hydroxycarboxylate in vitro. Shows a preference for NADPH over NADH as a redox partner. Do not catalyze the reverse reactions	ybiC	TRUE	TRUE	1MWQY@1224|Proteobacteria,COG2055@2|Bacteria,COG2055@1|root,3XM36@561|Escherichia,1RSKW@1236|Gammaproteobacteria			C
GUT_GENOME027387_01731	712.182	Phosphorolytic exoribonuclease that removes nucleotide residues following the -CCA terminus of tRNA and adds nucleotides to the ends of RNA molecules by using nucleoside diphosphates as substrates	rph	TRUE	TRUE	COG0689@2|Bacteria,COG0689@1|root,1MVFZ@1224|Proteobacteria,1RNTB@1236|Gammaproteobacteria,3XMIK@561|Escherichia			J
GUT_GENOME027387_02223	2586.16	Domain of unknown function (DUF5107)	yphG	TRUE	TRUE	COG0457@2|Bacteria,COG0457@1|root,1RRC8@1236|Gammaproteobacteria,1Q3TC@1224|Proteobacteria,3XP8A@561|Escherichia			R
GUT_GENOME027387_02557	889.868			TRUE	FALSE	1QNE4@1224|Proteobacteria,1S8B6@1236|Gammaproteobacteria,2ZYP7@2|Bacteria,arCOG04584@1|root,3XQA2@561|Escherichia	1322			1	0
GUT_GENOME027387_02945	495	Belongs to the carbamate kinase family	arcC	FALSE	TRUE	1MWXC@1224|Proteobacteria,1RP78@1236|Gammaproteobacteria,3X0E7@547|Enterobacter,COG0549@1|root,COG0549@2|Bacteria			E
GUT_GENOME027387_03076	1717.49	Translation factor necessary for the incorporation of selenocysteine into proteins. It probably replaces EF-Tu for the insertion of selenocysteine directed by the UGA codon. SelB binds GTP and GDP	selB	TRUE	TRUE	1MWXH@1224|Proteobacteria,1RQJI@1236|Gammaproteobacteria,COG3276@1|root,COG3276@2|Bacteria,3XNXT@561|Escherichia			J
GUT_GENOME027401_01787	416.617	Flagella synthesis protein FlgN	flgN	TRUE	TRUE	3XPTP@561|Escherichia,COG3418@1|root,COG3418@2|Bacteria,1SAU2@1236|Gammaproteobacteria,1MZUY@1224|Proteobacteria			N,U
GUT_GENOME027401_02568	1034.95	methyl beta-D-glucoside 6-phosphate glucohydrolase activity	chbF	TRUE	TRUE	COG1486@2|Bacteria,COG1486@1|root,1RPG8@1236|Gammaproteobacteria,1NI6G@1224|Proteobacteria,3XP95@561|Escherichia			G
GUT_GENOME027597_01932	210.001	response to butan-1-ol	yibT	TRUE	TRUE	3XQ0F@561|Escherichia,32Z93@2|Bacteria,2E4DS@1|root,1SD4V@1236|Gammaproteobacteria,1N93Z@1224|Proteobacteria	1998			1	1
GUT_GENOME027597_02495	326.744	Catalyzes, although with low efficiency, the sulfur transfer reaction from thiosulfate to cyanide	glpE	TRUE	TRUE	COG0607@2|Bacteria,COG0607@1|root,1S94C@1236|Gammaproteobacteria,1MZPW@1224|Proteobacteria,3XPQ7@561|Escherichia			P
GUT_GENOME027604_00536	2545.86	in response to the nitrogen status of the cell that GlnD senses through the glutamine level. Under low glutamine levels, catalyzes the conversion of the PII proteins and UTP to PII-UMP and PPi, while under higher glutamine levels, GlnD hydrolyzes PII-UMP to PII and UMP (deuridylylation). Thus, controls uridylylation state and activity of the PII proteins, and plays an important role in the regula…	glnD	TRUE	TRUE	1RN5T@1236|Gammaproteobacteria,1MV54@1224|Proteobacteria,COG2844@2|Bacteria,COG2844@1|root,3XMIM@561|Escherichia			O,T
GUT_GENOME027604_03758	228.012	Belongs to the UPF0352 family	yejL	TRUE	TRUE	COG3082@1|root,1S8XQ@1236|Gammaproteobacteria,COG3082@2|Bacteria,1MZ9I@1224|Proteobacteria,3XQ2C@561|Escherichia
GUT_GENOME027725_02630	1267.42	Prevents misfolding and promotes the refolding and proper assembly of unfolded polypeptides generated under stress conditions	groL	TRUE	TRUE	1RMTB@1236|Gammaproteobacteria,COG0459@1|root,1MURR@1224|Proteobacteria,COG0459@2|Bacteria,3XN1I@561|Escherichia			O
GUT_GENOME027725_03154	1192.06	Catalyzes the condensation reaction of fatty acid synthesis by the addition to an acyl acceptor of two carbons from malonyl-ACP. Specific for elongation from C-10 to unsaturated C-16 and C-18 fatty acids	fabB	TRUE	TRUE	COG0304@1|root,COG0304@2|Bacteria,1RMDE@1236|Gammaproteobacteria,1MU1X@1224|Proteobacteria,3XMTP@561|Escherichia			I,Q
GUT_GENOME027725_03547	1113.88	transmembrane transport	ybhS	TRUE	TRUE	COG0842@2|Bacteria,COG0842@1|root,1RPB4@1236|Gammaproteobacteria,1MW5R@1224|Proteobacteria,3XPH4@561|Escherichia			V
GUT_GENOME027725_03789	675.647	This is a second nitrate reductase enzyme which can substitute for the NRA enzyme and allows E.coli to use nitrate as an electron acceptor during anaerobic growth. The gamma chain is a membrane-embedded heme-iron unit resembling cytochrome b, which transfers electrons from quinones to the beta subunit	narI	TRUE	TRUE	1MXGZ@1224|Proteobacteria,COG2181@2|Bacteria,COG2181@1|root,1RPTD@1236|Gammaproteobacteria,3XPBJ@561|Escherichia			C,P
GUT_GENOME027725_04282	1169.73	Anaerobic glycerol-3-phosphate dehydrogenase subunit C	glpC	TRUE	TRUE	COG0247@2|Bacteria,1MWTK@1224|Proteobacteria,1RQ9M@1236|Gammaproteobacteria,COG0247@1|root,3XP8B@561|Escherichia			C
GUT_GENOME027803_00520	257.997	Protein of unknown function (DUF2534)	ynaJ	TRUE	TRUE	1N0ZR@1224|Proteobacteria,COG3182@1|root,1S9Y9@1236|Gammaproteobacteria,3XPZ8@561|Escherichia,COG3182@2|Bacteria
GUT_GENOME027803_04209	398.172	acyl-CoA thioester hydrolase	yciA	TRUE	TRUE	1MZAZ@1224|Proteobacteria,COG1607@2|Bacteria,1SA9N@1236|Gammaproteobacteria,3XPM1@561|Escherichia,COG1607@1|root			I
GUT_GENOME027823_03030	270.017			TRUE	TRUE	3396J@2|Bacteria,2EFDQ@1|root,1SDUP@1236|Gammaproteobacteria,1N5ZY@1224|Proteobacteria	492			1	1
GUT_GENOME027823_03280	672			TRUE	FALSE	1NT3X@1224|Proteobacteria,1SMYG@1236|Gammaproteobacteria,2EZ5W@1|root,33SBY@2|Bacteria	1911			1	0
GUT_GENOME027823_04024	210.857	Stress-induced protein	yciG	TRUE	TRUE	COG3729@2|Bacteria,1N767@1224|Proteobacteria,1SCA5@1236|Gammaproteobacteria,COG3729@1|root,3XQ2R@561|Escherichia	2605		R	1	1
GUT_GENOME027885_00941	1324.34	L-serine dehydratase 1	sdaA	TRUE	TRUE	COG1760@1|root,COG1760@2|Bacteria,1MUZN@1224|Proteobacteria,1RMJZ@1236|Gammaproteobacteria,3XN8Q@561|Escherichia			E
GUT_GENOME028425_02659	791.887	The alpha subunit is responsible for the aldol cleavage of indoleglycerol phosphate to indole and glyceraldehyde 3- phosphate	trpA	TRUE	TRUE	1MXJV@1224|Proteobacteria,COG0159@2|Bacteria,COG0159@1|root,3XMUJ@561|Escherichia,1RMGN@1236|Gammaproteobacteria			E
GUT_GENOME028430_01894	1800.24	cyclic-guanylate-specific phosphodiesterase activity	yfeA	TRUE	TRUE	1T1U0@1236|Gammaproteobacteria,COG2199@2|Bacteria,COG2199@1|root,COG2200@1|root,3XNQ0@561|Escherichia,COG2200@2|Bacteria,1RGCV@1224|Proteobacteria			T
GUT_GENOME028489_00067	465			FALSE	TRUE	30KCQ@2|Bacteria,2V5XA@28211|Alphaproteobacteria,2KA5G@204457|Sphingomonadales,29YHK@1|root,1QN52@1224|Proteobacteria
GUT_GENOME028489_00068	425.111			FALSE	TRUE
GUT_GENOME028489_00072	478.429			FALSE	TRUE
GUT_GENOME028489_00078	1023	AAA ATPase central domain protein		FALSE	TRUE	1TRA6@1239|Firmicutes,4H3V0@909932|Negativicutes,COG0465@1|root,COG0465@2|Bacteria			O
GUT_GENOME028489_00079	885			FALSE	TRUE
GUT_GENOME028489_00080	480			FALSE	TRUE
GUT_GENOME028489_00087	504	nuclease		FALSE	TRUE	COG1525@1|root,1MZNP@1224|Proteobacteria,2UCTJ@28211|Alphaproteobacteria,3K1I3@41294|Bradyrhizobiaceae,COG1525@2|Bacteria			L
GUT_GENOME028489_00090	687	TraX protein		FALSE	TRUE	1R6BE@1224|Proteobacteria,2DBDG@1|root,2VH9W@28216|Betaproteobacteria,2Z8KP@2|Bacteria,4AG50@80864|Comamonadaceae
GUT_GENOME028489_00092	306	TrbM	kikA	FALSE	TRUE	1N527@1224|Proteobacteria,1MT0M@122277|Pectobacterium,1S8VP@1236|Gammaproteobacteria,2E2MR@1|root,32XQV@2|Bacteria
GUT_GENOME028489_00095	1395	Conjugal transfer protein		FALSE	TRUE	COG2948@2|Bacteria,COG2948@1|root,1X4VJ@135614|Xanthomonadales,1RYRS@1236|Gammaproteobacteria,1MU7U@1224|Proteobacteria			U
GUT_GENOME028489_00096	447.353	PFAM Conjugal transfer, TrbH		FALSE	TRUE	1RIA1@1224|Proteobacteria,2AXJ9@1|root,2VTH3@28216|Betaproteobacteria,31PJ9@2|Bacteria
GUT_GENOME028489_00097	891	transfer protein TrbG		FALSE	TRUE	COG3504@2|Bacteria,COG3504@1|root,2K1EQ@204457|Sphingomonadales,2TR8Y@28211|Alphaproteobacteria,1MVEF@1224|Proteobacteria			U
GUT_GENOME028489_00098	708	VirB8 protein	trbF	FALSE	TRUE	1JDMC@118969|Legionellales,1MVUC@1224|Proteobacteria,1RNUE@1236|Gammaproteobacteria,COG3701@1|root,COG3701@2|Bacteria			U
GUT_GENOME028489_00099	2420.32	CagE, TrbE, VirB family, component of type IV transporter system		FALSE	TRUE	1MXH0@1224|Proteobacteria,1RQW2@1236|Gammaproteobacteria,COG3451@1|root,COG3451@2|Bacteria,1JCGV@118969|Legionellales			U
GUT_GENOME028489_00100	326.82	Conjugal transfer protein	trbD	FALSE	TRUE	COG5268@2|Bacteria,COG5268@1|root,1SA65@1236|Gammaproteobacteria,1RKQ7@1224|Proteobacteria			N,U
GUT_GENOME028489_00101	381.647	Conjugal transfer protein	trbC	FALSE	TRUE	COG3838@2|Bacteria,COG3838@1|root,1SG9P@1236|Gammaproteobacteria,1NBH2@1224|Proteobacteria			U
GUT_GENOME028489_00102	893.089	FtsK/SpoIIIE family	virB	FALSE	TRUE	COG4962@2|Bacteria,COG4962@1|root,1R7EN@1224|Proteobacteria,1JD8A@118969|Legionellales,1RP9G@1236|Gammaproteobacteria			U,W
GUT_GENOME028489_00103	405	Cro/C1-type HTH DNA-binding domain		FALSE	TRUE	1REV7@1224|Proteobacteria,COG1476@2|Bacteria,COG1476@1|root,2VRF1@28216|Betaproteobacteria			K
GUT_GENOME028489_00105	894	TrfA protein		FALSE	TRUE	COG3464@1|root,COG3464@2|Bacteria,1R97S@1224|Proteobacteria,1RRBR@1236|Gammaproteobacteria			L,X
GUT_GENOME028489_00106	300	RelE-like toxin of type II toxin-antitoxin system HigB	higB	FALSE	TRUE	COG3549@1|root,COG3549@2|Bacteria			V
GUT_GENOME028489_00109	588			FALSE	TRUE
GUT_GENOME028489_00113	468	Antirestriction protein		FALSE	TRUE	1REBZ@1224|Proteobacteria,2921C@1|root,2ZPKK@2|Bacteria
GUT_GENOME028489_00114	1088.66			FALSE	TRUE	2Z8N5@2|Bacteria,2DBDN@1|root,1SM4V@1236|Gammaproteobacteria,1R9H1@1224|Proteobacteria
GUT_GENOME028489_00118	324			FALSE	TRUE
GUT_GENOME028489_00120	591	Protein conserved in bacteria		FALSE	TRUE	COG4185@2|Bacteria,1RFDC@1224|Proteobacteria,COG4185@1|root			R
GUT_GENOME028489_00121	474			FALSE	TRUE
GUT_GENOME028489_00122	786			FALSE	TRUE	2FIZR@1|root,34AQG@2|Bacteria,1SRXT@1236|Gammaproteobacteria,1P3HB@1224|Proteobacteria
GUT_GENOME028489_00123	1113	Belongs to the TelA family		FALSE	TRUE	1MZ3B@1224|Proteobacteria,1RZUJ@1236|Gammaproteobacteria,COG3853@1|root,COG3853@2|Bacteria			P,V
GUT_GENOME028489_00124	705			FALSE	TRUE
GUT_GENOME028489_00126	765	ATPase MipZ		FALSE	TRUE	COG1192@2|Bacteria,COG1192@1|root,462XZ@72273|Thiotrichales,1RTW1@1236|Gammaproteobacteria,1R5XZ@1224|Proteobacteria			D,N
GUT_GENOME028489_00127	1014	KorB domain		FALSE	TRUE	COG1475@2|Bacteria,COG1475@1|root,2VPF5@28216|Betaproteobacteria,1R634@1224|Proteobacteria,3T79E@506|Alcaligenaceae			D,K
GUT_GENOME028489_00129	416.264	Fic/DOC family		FALSE	TRUE	1RK7Q@1224|Proteobacteria,2AIUI@1|root,2VTMT@28216|Betaproteobacteria,319BQ@2|Bacteria
GUT_GENOME028489_00133	439.358	Transcriptional activator TraM		FALSE	TRUE	30B7N@2|Bacteria,2VSU3@28216|Betaproteobacteria,29Q8M@1|root,1REQN@1224|Proteobacteria
GUT_GENOME028489_00134	786	CobQ/CobB/MinD/ParA nucleotide binding domain		FALSE	TRUE	COG1192@2|Bacteria,COG1192@1|root,1XRHD@135619|Oceanospirillales,1S10G@1236|Gammaproteobacteria,1R4EP@1224|Proteobacteria			D,N
GUT_GENOME028489_00135	435	Family of unknown function (DUF5338)		FALSE	TRUE	336YE@2|Bacteria,2ED1F@1|root,1SHXN@1236|Gammaproteobacteria,1N7TE@1224|Proteobacteria,1JEIA@118969|Legionellales
GUT_GENOME028489_00136	360			FALSE	TRUE	2VTRJ@28216|Betaproteobacteria,2C092@1|root,1RH67@1224|Proteobacteria,31AZX@2|Bacteria
GUT_GENOME028489_00137	2550.85	Relaxase mobilization nuclease family protein	traI	FALSE	TRUE	COG3843@2|Bacteria,COG3843@1|root,1QUDG@1224|Proteobacteria,2VNBT@28216|Betaproteobacteria,1K7IC@119060|Burkholderiaceae			U
GUT_GENOME028489_00139	1945.14	Conjugal transfer protein TraG		FALSE	TRUE	COG3505@2|Bacteria,COG3505@1|root,1MV1G@1224|Proteobacteria,1RNF5@1236|Gammaproteobacteria			U
GUT_GENOME028489_00140	534	Signal peptidase, peptidase S26		FALSE	TRUE	COG4959@2|Bacteria,COG4959@1|root,1RBHE@1224|Proteobacteria,2U9YP@28211|Alphaproteobacteria			O,U
GUT_GENOME028489_00141	423			FALSE	TRUE
GUT_GENOME028489_04255	384.545	Belongs to the D-isomer specific 2-hydroxyacid dehydrogenase family	ldhA	FALSE	TRUE	COG1052@1|root,COG1052@2|Bacteria,1RMWR@1236|Gammaproteobacteria,1MVSS@1224|Proteobacteria,3XMY4@561|Escherichia	1107		C,H,R	0	1
GUT_GENOME028918_00332	636.306	Catalyzes the transfer of a ribosyl phosphate group from 5-phosphoribose 1-diphosphate to orotate, leading to the formation of orotidine monophosphate (OMP)	pyrE	TRUE	TRUE	COG0461@2|Bacteria,1MW6F@1224|Proteobacteria,COG0461@1|root,1RQYG@1236|Gammaproteobacteria,3XNWG@561|Escherichia			F
GUT_GENOME028918_00495	986.972	Catalyzes the NAD( )-dependent oxidation of L-threonine to 2-amino-3-ketobutyrate	ydjJ	TRUE	TRUE	1RMNY@1236|Gammaproteobacteria,1MV9A@1224|Proteobacteria,COG1063@1|root,COG1063@2|Bacteria	1130		C,E,R	1	1
GUT_GENOME028918_00541	490.127	Domain of unknown function (DUF1877)	yfbM	TRUE	TRUE	3XNXP@561|Escherichia,29094@1|root,1SFMG@1236|Gammaproteobacteria,1NADM@1224|Proteobacteria,2ZMYT@2|Bacteria
GUT_GENOME028918_02057	576.086	HTH-type transcriptional regulator UidR	uidR	TRUE	TRUE	COG1309@2|Bacteria,COG1309@1|root,3XQ9Q@561|Escherichia,1SXZ7@1236|Gammaproteobacteria,1RARJ@1224|Proteobacteria			K
GUT_GENOME028918_02068	478.2	Catalyzes the proton-dependent transport of sialic acid	nanT	TRUE	TRUE	1MWKH@1224|Proteobacteria,1RZ3Z@1236|Gammaproteobacteria,3XP7A@561|Escherichia,COG0477@1|root,COG2814@2|Bacteria			E,G,P,R
GUT_GENOME028975_02353	1329.31	Belongs to the argininosuccinate synthase family. Type 2 subfamily	argG	TRUE	TRUE	1MV0Y@1224|Proteobacteria,1RMEC@1236|Gammaproteobacteria,COG0137@2|Bacteria,COG0137@1|root,3XN1V@561|Escherichia			E,F
GUT_GENOME029115_02883	574.5	Part of the ABC transporter complex PstSACB involved in phosphate import. Responsible for energy coupling to the transport system	pstB	TRUE	TRUE	COG1117@2|Bacteria,COG1117@1|root,1MU16@1224|Proteobacteria,1RNUF@1236|Gammaproteobacteria	145		P	1	1
GUT_GENOME029217_01829	604.924	ubiquinone biosynthetic process from chorismate	yigP	TRUE	TRUE	COG3165@2|Bacteria,COG3165@1|root,1S745@1236|Gammaproteobacteria,1R1CM@1224|Proteobacteria,3XNZU@561|Escherichia			H
GUT_GENOME029217_02846	516	Protein of unknown function (DUF1116)		TRUE	FALSE	1RQEG@1236|Gammaproteobacteria,3XRND@561|Escherichia,COG0074@1|root,COG0074@2|Bacteria,1MX67@1224|Proteobacteria			C
GUT_GENOME029258_00083	1121.76	Catalyzes the reversible epimerization at C-2 of UDP-N- acetylglucosamine (UDP-GlcNAc) and thereby provides bacteria with UDP-N-acetylmannosamine (UDP-ManNAc), the activated donor of ManNAc residues	wecB	TRUE	TRUE	1RPNC@1236|Gammaproteobacteria,1MWZN@1224|Proteobacteria,COG0381@1|root,COG0381@2|Bacteria,3XM4Q@561|Escherichia			M
GUT_GENOME029258_00842	518.063	Prepilin peptidase dependent protein B	ppdB	TRUE	TRUE	1S374@1236|Gammaproteobacteria,1RHSZ@1224|Proteobacteria,COG4795@2|Bacteria,3XN7W@561|Escherichia,COG4795@1|root			U
GUT_GENOME029258_02696	591.814	Pyrophosphatase that catalyzes the hydrolysis of nucleoside triphosphates to their monophosphate derivatives, with a high preference for the non-canonical purine nucleotides XTP (xanthosine triphosphate), dITP (deoxyinosine triphosphate) and ITP. Seems to function as a house-cleaning enzyme that removes non-canonical purine nucleotides from the nucleotide pool, thus preventing their incorporation…	rdgB	TRUE	TRUE	COG0127@2|Bacteria,1MUK5@1224|Proteobacteria,1S27C@1236|Gammaproteobacteria,COG0127@1|root,3XNRH@561|Escherichia			F
GUT_GENOME029295_00517	804.475	Involved in base excision repair of DNA damaged by oxidation or by mutagenic agents. Acts as DNA glycosylase that recognizes and removes damaged bases. Has a preference for oxidized purines, such as 7,8-dihydro-8-oxoguanine (8-oxoG). Has AP (apurinic apyrimidinic) lyase activity and introduces nicks in the DNA strand. Cleaves the DNA backbone by beta-delta elimination to generate a single-strand …	fpg	TRUE	TRUE	1RP3J@1236|Gammaproteobacteria,3XNNS@561|Escherichia,1MVM5@1224|Proteobacteria,COG0266@1|root,COG0266@2|Bacteria			L
GUT_GENOME029295_02469	886.811	Part of the ABC transporter complex FhuCDB involved in iron(3 )-hydroxamate import. Binds the iron(3 )-hydroxamate complex and transfers it to the membrane-bound permease. Required for the transport of all iron(3 )-hydroxamate siderophores such as ferrichrome, gallichrome, desferrioxamine, coprogen, aerobactin, shizokinen, rhodotorulic acid and the antibiotic albomycin	fhuD	TRUE	TRUE	COG0614@2|Bacteria,COG0614@1|root,1RNIS@1236|Gammaproteobacteria,1PEJ1@1224|Proteobacteria,3XN97@561|Escherichia			P
GUT_GENOME029317_00084	984.118	Peptidase M16 inactive domain protein	hypA2	TRUE	TRUE	1RAR0@1224|Proteobacteria,COG3539@1|root,1S25S@1236|Gammaproteobacteria,COG3539@2|Bacteria,3XQ9J@561|Escherichia	146		N,U	1	1
GUT_GENOME029317_00248	332.752	The SecYEG-SecDF-YajC-YidC holo-translocon (HTL) protein secretase insertase is a supercomplex required for protein secretion, insertion of proteins into membranes, and assembly of membrane protein complexes	yajC	TRUE	TRUE	1S9NV@1236|Gammaproteobacteria,COG1862@1|root,COG1862@2|Bacteria,1MZT2@1224|Proteobacteria,3XPRI@561|Escherichia			U
GUT_GENOME029317_01719	1596.66	acetolactate synthase	ilvG	TRUE	TRUE	1MU6U@1224|Proteobacteria,1RMQQ@1236|Gammaproteobacteria,COG0028@2|Bacteria,COG0028@1|root,3XMNP@561|Escherichia			E,H
GUT_GENOME029317_02023	708.721	YfhG lipoprotein	yfhG	TRUE	TRUE	1RDX1@1224|Proteobacteria,1S4CU@1236|Gammaproteobacteria,COG3170@2|Bacteria,COG3170@1|root,3XN5I@561|Escherichia			N,U,W
GUT_GENOME029317_02899	1978.98	outer membrane usher protein	yehB	FALSE	TRUE	COG3188@1|root,COG3188@2|Bacteria,1MUHE@1224|Proteobacteria,1RMPU@1236|Gammaproteobacteria,3XN71@561|Escherichia			N,U,W
GUT_GENOME029317_03364	813.985	Taurine transport system permease protein	tauC	TRUE	TRUE	COG0600@2|Bacteria,COG0600@1|root,1RQ0A@1236|Gammaproteobacteria,1MWDJ@1224|Proteobacteria,3XN2Z@561|Escherichia			P
GUT_GENOME029317_03651	204	) H( ) antiporter that extrudes potassium in exchange for external protons and maintains the internal concentration of potassium under toxic levels	nhaP2	TRUE	TRUE	COG3263@1|root,COG3263@2|Bacteria,1MVKV@1224|Proteobacteria,1RMCA@1236|Gammaproteobacteria,3XMWT@561|Escherichia	2694		C,P	1	1
GUT_GENOME029317_03690	1033.52	Flavin transferase that catalyzes the transfer of the FMN moiety of FAD and its covalent binding to the hydroxyl group of a threonine residue in a target flavoprotein	apbE	TRUE	TRUE	1MW6K@1224|Proteobacteria,COG1477@2|Bacteria,1RNMZ@1236|Gammaproteobacteria,COG1477@1|root,3XN11@561|Escherichia			H,O
GUT_GENOME029386_01299	435	PFAM Mo-dependent nitrogenase		TRUE	FALSE	1MZYH@1224|Proteobacteria,1SUJQ@1236|Gammaproteobacteria,COG3793@1|root,COG3793@2|Bacteria			P
GUT_GENOME029386_01367	1492.16	cyclic-di-GMP binding	bcsE	TRUE	TRUE	1RQGD@1236|Gammaproteobacteria,28JMX@1|root,2Z9EC@2|Bacteria,1R485@1224|Proteobacteria,3XNE5@561|Escherichia
GUT_GENOME029386_02387	2734.85	The MdtABC tripartite complex confers resistance against novobiocin and deoxycholate	mdtC	TRUE	TRUE	1MU48@1224|Proteobacteria,1RMBN@1236|Gammaproteobacteria,COG0841@1|root,COG0841@2|Bacteria,3XNUD@561|Escherichia			V
GUT_GENOME029386_02679	983.795	Periplasmic binding protein		TRUE	TRUE	1NVK4@1224|Proteobacteria,COG0614@2|Bacteria,COG0614@1|root,1RSK8@1236|Gammaproteobacteria,3XQHM@561|Escherichia	1022		P	1	0.761905
GUT_GENOME029386_02841	815.412	Serine hydrolase involved in the detoxification of formaldehyde	yeiG	TRUE	TRUE	1MUID@1224|Proteobacteria,1RMR3@1236|Gammaproteobacteria,COG0627@1|root,COG0627@2|Bacteria,3XP8I@561|Escherichia			V
GUT_GENOME029386_02961	1337.35	Porin-like glycoporin RafY		TRUE	TRUE	COG4580@2|Bacteria,1R3B6@1224|Proteobacteria,COG4580@1|root,1T65Z@1236|Gammaproteobacteria,3XQX2@561|Escherichia	1024		G	1	1
GUT_GENOME029386_03416	469.654	phosphonate metabolism protein PhnM	phnM	TRUE	TRUE	COG3454@1|root,1RMR7@1236|Gammaproteobacteria,COG3454@2|Bacteria,1MV7H@1224|Proteobacteria	110		P	1	1
GUT_GENOME029386_03887	655.852	Reversible hydration of carbon dioxide. Carbon dioxide formed in the bicarbonate-dependent decomposition of cyanate by cyanase (CynS) diffuses out of the cell faster than it would be hydrated to bicarbonate, so the apparent function of this enzyme is to catalyze the hydration of carbon dioxide and thus prevent depletion of cellular bicarbonate	cynT	FALSE	TRUE	COG0288@2|Bacteria,1MV1U@1224|Proteobacteria,1SYDI@1236|Gammaproteobacteria,3XQ72@561|Escherichia,COG0288@1|root	2692		P	0.4	1
GUT_GENOME029386_03889	1853.64	Functions as an auxiliary enzyme in the beta-oxidation of unsaturated fatty acids with double bonds at even carbon positions. Catalyzes the NADPH-dependent reduction of the C4-C5 double bond of the acyl chain of 2,4-dienoyl-CoA to yield 2-trans- enoyl-CoA. Acts on both isomers, 2-trans,4-cis- and 2-trans,4-trans-decadienoyl-CoA, with almost equal efficiency. Is not active with NADH instead of NAD…	fadH	TRUE	TRUE	1RNM8@1236|Gammaproteobacteria,COG1902@2|Bacteria,COG1902@1|root,COG0446@1|root,1MVE0@1224|Proteobacteria,COG0446@2|Bacteria,3XNUV@561|Escherichia			C,I
GUT_GENOME029386_03940	1185.43	FAD-dependent monooxygenase required for the aerobic hydroxylation of 2-octaprenylphenol to 2-octaprenyl-6-hydroxy- phenol, the first hydroxylation step in coenzyme Q (ubiquinone) biosynthesis	visC	TRUE	TRUE	1MU6I@1224|Proteobacteria,1RND5@1236|Gammaproteobacteria,COG0654@1|root,COG0654@2|Bacteria,3XMGD@561|Escherichia			C,H
GUT_GENOME029501_00199	691.447	ATP binding	yghS	FALSE	TRUE	COG0125@2|Bacteria,COG0125@1|root,1RPR5@1236|Gammaproteobacteria,1R4NC@1224|Proteobacteria,3XM9D@561|Escherichia			F
GUT_GENOME029592_01699	573.505	Protein of unknown function (DUF1131)	yfeY	TRUE	TRUE	3XMY9@561|Escherichia,2ZC5Z@2|Bacteria,1RB4E@1224|Proteobacteria,1RRU9@1236|Gammaproteobacteria,28PEC@1|root
GUT_GENOME029592_02120	375.531	cell adhesion involved in biofilm formation	ycgV	FALSE	TRUE	1R3VW@1224|Proteobacteria,COG3468@2|Bacteria,1RSKC@1236|Gammaproteobacteria,COG3468@1|root			M,U
GUT_GENOME029671_01364	1078.99	ATPase that binds to both the 70S ribosome and the 50S ribosomal subunit in a nucleotide-independent manner	ychF	TRUE	TRUE	COG0012@1|root,COG0012@2|Bacteria,1RMBI@1236|Gammaproteobacteria,1MVM4@1224|Proteobacteria,3XNGE@561|Escherichia			J
GUT_GENOME029671_02070	2512.56	Catalyzes the isomerization of citrate to isocitrate via cis-aconitate	acnA	TRUE	TRUE	COG1048@2|Bacteria,COG1048@1|root,1MU9T@1224|Proteobacteria,1RN5I@1236|Gammaproteobacteria,3XNZ5@561|Escherichia			C
GUT_GENOME029671_02271	1556.04	heat shock protein 70	hscC	FALSE	TRUE	COG0443@2|Bacteria,1MUR1@1224|Proteobacteria,1RR7P@1236|Gammaproteobacteria,3XM93@561|Escherichia,COG0443@1|root	2556		O	0	1
GUT_GENOME029710_00787	267.048	Phage integrase family		TRUE	TRUE	2ECN4@1|root,1N7EC@1224|Proteobacteria,1SFSW@1236|Gammaproteobacteria,336K1@2|Bacteria,3XQ5H@561|Escherichia			K
GUT_GENOME029739_00023	938.347	Part of the ABC transporter complex RbsABC involved in ribose import. Probably responsible for the translocation of the substrate across the membrane	rbsC	TRUE	TRUE				P
GUT_GENOME029739_00950	1205.02	Inner membrane transport protein YqeG	yqeG	TRUE	TRUE	1RR18@1236|Gammaproteobacteria,1QF5A@1224|Proteobacteria,3XM49@561|Escherichia,COG0814@2|Bacteria,COG0814@1|root			E
GUT_GENOME029739_00979	655.356	beta-maltose 4-alpha-glucanotransferase activity	malQ	TRUE	TRUE	COG3147@2|Bacteria,COG3147@1|root,3XMJM@561|Escherichia,1RRKM@1236|Gammaproteobacteria,1MXHQ@1224|Proteobacteria			D
GUT_GENOME029739_01148	1020.35	Required for accurate and efficient protein synthesis under certain stress conditions. May act as a fidelity factor of the translation reaction, by catalyzing a one-codon backward translocation of tRNAs on improperly translocated ribosomes. Back- translocation proceeds from a post-translocation (POST) complex to a pre-translocation (PRE) complex, thus giving elongation factor G a second chance to…	lepA	FALSE	TRUE	COG0481@2|Bacteria,COG0481@1|root,3XNWA@561|Escherichia,1RPFB@1236|Gammaproteobacteria,1MVZA@1224|Proteobacteria	68		J	0	1
GUT_GENOME029739_01369	216.058			TRUE	TRUE	2AV4N@1|root,31KUV@2|Bacteria,1TGJI@1236|Gammaproteobacteria,1QIQ7@1224|Proteobacteria,3XR7E@561|Escherichia
GUT_GENOME029739_01594	1027.25	serine-type endopeptidase activity	sohB	TRUE	TRUE	COG0616@2|Bacteria,COG0616@1|root,3XNTR@561|Escherichia,1RNN9@1236|Gammaproteobacteria,1MUXE@1224|Proteobacteria			O,U
GUT_GENOME029739_02458	601.397	Mediates electron flow from quinones to the NapAB complex	napC	TRUE	TRUE	COG3005@2|Bacteria,1RQ9A@1236|Gammaproteobacteria,COG3005@1|root,1MWV2@1224|Proteobacteria,3XNSB@561|Escherichia			C
GUT_GENOME029819_01835	1102.82	peptidyl-arginine hydroxylation	ycfD	TRUE	TRUE	COG2850@1|root,3XN3B@561|Escherichia,1RN2Q@1236|Gammaproteobacteria,1MW30@1224|Proteobacteria,COG2850@2|Bacteria			J
GUT_GENOME029819_02152	1303.45	galactarate transporter	garP	TRUE	TRUE	COG2271@1|root,1MVPS@1224|Proteobacteria,1RNMV@1236|Gammaproteobacteria,3XNY3@561|Escherichia,COG2271@2|Bacteria			G,P
GUT_GENOME029819_02422	979.098	Permease protein	yehY	TRUE	TRUE	COG1732@1|root,1RN72@1236|Gammaproteobacteria,1MV9N@1224|Proteobacteria,COG1732@2|Bacteria,3XM88@561|Escherichia			M
GUT_GENOME029819_03244	506.147	LexA-binding, inner membrane-associated putative hydrolase	ybcI	TRUE	TRUE	1S2F9@1236|Gammaproteobacteria,COG1988@2|Bacteria,COG1988@1|root,1RBHW@1224|Proteobacteria,3XPG8@561|Escherichia			R
GUT_GENOME029819_03623	437.849	Prokaryotic N-terminal methylation motif	ppdA	FALSE	TRUE	3XN4R@561|Escherichia,1S4ND@1236|Gammaproteobacteria,COG2165@1|root,COG2165@2|Bacteria,1RDKI@1224|Proteobacteria	2570		N,U,W	0	1
GUT_GENOME029975_00994	1117.11	Lipopolysaccharide core biosynthesis protein RfaG	rfaG	TRUE	TRUE	COG0438@1|root,COG0438@2|Bacteria,1RQE3@1236|Gammaproteobacteria,1NE3V@1224|Proteobacteria,3XNUU@561|Escherichia	275		M	1	1
GUT_GENOME029975_01069	312	Activation of anaerobic ribonucleoside-triphosphate reductase under anaerobic conditions by generation of an organic free radical, using S-adenosylmethionine and reduced flavodoxin as cosubstrates to produce 5'-deoxy-adenosine	nrdG	TRUE	TRUE	1RA7S@1224|Proteobacteria,1S20X@1236|Gammaproteobacteria,3XNWN@561|Escherichia,COG0602@1|root,COG0602@2|Bacteria	1416		H,O	1	1
GUT_GENOME029975_02172	959.13	NADH oxidoreductase	hcr	TRUE	TRUE	COG1018@1|root,COG1018@2|Bacteria,3XMND@561|Escherichia,1MY2Q@1224|Proteobacteria,1RR5A@1236|Gammaproteobacteria			C
GUT_GENOME029975_02176	2045.9	Catalyzes the formation of a hydroxyacyl-CoA by addition of water on enoyl-CoA. Also exhibits 3-hydroxyacyl-CoA epimerase and 3-hydroxyacyl-CoA dehydrogenase activities	fadJ	TRUE	TRUE	COG1250@1|root,1MU9P@1224|Proteobacteria,COG1250@2|Bacteria,COG1024@2|Bacteria,COG1024@1|root,1RMZ8@1236|Gammaproteobacteria,3XMJZ@561|Escherichia			I
GUT_GENOME029975_02289	2767.82	Belongs to the glycosyl hydrolase 2 family	lacZ	TRUE	TRUE	COG3250@1|root,1MVBN@1224|Proteobacteria,COG3250@2|Bacteria,1RMER@1236|Gammaproteobacteria,3XNFH@561|Escherichia			G
GUT_GENOME030096_01994	516.747	Lipid phosphatase which dephosphorylates phosphatidylglycerophosphate (PGP) to phosphatidylglycerol (PG)	pgpA	TRUE	TRUE	COG1267@1|root,COG1267@2|Bacteria,1S68A@1236|Gammaproteobacteria,1MZJA@1224|Proteobacteria,3XNNH@561|Escherichia			I
GUT_GENOME030136_01410	1646.5	Siderophore biosynthesis protein	iucA	TRUE	TRUE	1QUJJ@1224|Proteobacteria,1RQQ0@1236|Gammaproteobacteria,COG4264@1|root,COG4264@2|Bacteria	461		P,Q	1	1
GUT_GENOME030136_02057	234.52	DinI-like family	msgA	TRUE	FALSE	1S9BX@1236|Gammaproteobacteria,1MZFZ@1224|Proteobacteria,2CCWH@1|root,32RKW@2|Bacteria,3WYPU@544|Citrobacter
GUT_GENOME030164_00603	253.353			FALSE	TRUE
GUT_GENOME030164_01548	377.368	May reduce aminoacrylate peracid to aminoacrylate. Required to remove a toxic intermediate produce by the pyrimidine nitrogen degradation	rutC	TRUE	TRUE	COG0251@2|Bacteria,1RD6W@1224|Proteobacteria,COG0251@1|root,1S47V@1236|Gammaproteobacteria	1538		J,V	1	1
GUT_GENOME030184_00107	1145.61	Ethanolamine utilization protein eutG	eutG	FALSE	TRUE	3XPC0@561|Escherichia,1RMVU@1236|Gammaproteobacteria,1MVPH@1224|Proteobacteria,COG1454@1|root,COG1454@2|Bacteria			C
GUT_GENOME030184_01904	352.5	Belongs to the prokaryotic GSH synthase family	gshB	TRUE	TRUE	1RMU0@1236|Gammaproteobacteria,COG0189@2|Bacteria,COG0189@1|root,1MVUA@1224|Proteobacteria	2008		E,H,J,Q	1	1
GUT_GENOME030184_02352	1140.57	Hexuronate transporter	exuT	TRUE	TRUE	1MV04@1224|Proteobacteria,COG2271@1|root,3XNJH@561|Escherichia,COG2271@2|Bacteria,1RP70@1236|Gammaproteobacteria			G,P
GUT_GENOME030184_02355	1500.13	Involved in glutamate-dependent acid resistance. Imports glutamate inside the cell while simultaneously exporting to the periplasm the GABA produced by GadA and GadB. The gad system helps to maintain a near-neutral intracellular pH when cells are exposed to extremely acidic conditions. The ability to survive transit through the acidic conditions of the stomach is essential for successful coloniza…	gadC	TRUE	TRUE	1RR0V@1236|Gammaproteobacteria,1MUP1@1224|Proteobacteria,COG0531@2|Bacteria,COG0531@1|root,3XMIU@561|Escherichia			E
GUT_GENOME030184_03369	1555.53	higher expression in the presence of deoxycholate inhibits cell growth completely. Bile acid detergents such as deoxycholate are important for host defense against bacterial growth in the gall bladder and duodenum	ygiS	TRUE	TRUE	1RWN5@1236|Gammaproteobacteria,COG4166@2|Bacteria,1R9KS@1224|Proteobacteria,COG4166@1|root,3XNUG@561|Escherichia	1125		E	1	1
GUT_GENOME030184_03434	926.357	Belongs to the ATCase OTCase family	pyrB	TRUE	TRUE	1MWAB@1224|Proteobacteria,1RPSV@1236|Gammaproteobacteria,COG0540@1|root,COG0540@2|Bacteria,3XMRZ@561|Escherichia			F
GUT_GENOME030213_00802	1318.41	Responsible for the transport of C4-dicarboxylates from the periplasm across the inner membrane	dcuB	TRUE	TRUE	COG2704@2|Bacteria,COG2704@1|root,3XMXI@561|Escherichia,1RPTE@1236|Gammaproteobacteria,1MVHH@1224|Proteobacteria			G
GUT_GENOME030325_01518	1325.41	Catalyzes the hydrolysis of the N-glycosidic bond of diverse pyrimidine and purine nucleotide 5'-monophosphates, to form ribose 5-phosphate and the corresponding free base. Can use AMP, GMP, IMP, CMP, dTMP and UMP as substrates. Cannot catalyze the reverse reactions	ygdH	TRUE	TRUE	1MVQJ@1224|Proteobacteria,1RQHX@1236|Gammaproteobacteria,3XN7C@561|Escherichia,COG1611@1|root,COG1611@2|Bacteria			F
GUT_GENOME030325_03589	2193.98	Belongs to the glycosyl hydrolase 3 family	bglX	TRUE	TRUE	COG1472@2|Bacteria,1MVIV@1224|Proteobacteria,1RMA0@1236|Gammaproteobacteria,COG1472@1|root,3XN99@561|Escherichia			G
GUT_GENOME030351_02627	683.365	enzyme activator activity	yjcO	TRUE	TRUE	3XNHQ@561|Escherichia,1NEX5@1224|Proteobacteria,COG0790@1|root,COG0790@2|Bacteria,1RPRA@1236|Gammaproteobacteria			R
GUT_GENOME030377_01156	1480.01	Part of the ABC transporter complex MglABC involved in galactose methyl galactoside import. Responsible for energy coupling to the transport system	mglA	TRUE	TRUE	1MU22@1224|Proteobacteria,1RMCH@1236|Gammaproteobacteria,3XNCM@561|Escherichia,COG1129@1|root,COG1129@2|Bacteria			G,P
GUT_GENOME030377_02463	574.67	BON domain	yraP	TRUE	TRUE	1RY2B@1236|Gammaproteobacteria,COG2823@1|root,COG2823@2|Bacteria,1MUZ2@1224|Proteobacteria,3XNV6@561|Escherichia			M
GUT_GENOME030377_02614	679.185	Required for the biogenesis of type 1 fimbriae. Binds and interact with FimH	fimC	FALSE	TRUE	COG3121@1|root,1RS56@1236|Gammaproteobacteria,1R3T9@1224|Proteobacteria,COG3121@2|Bacteria	298		M,W	0	1
GUT_GENOME030377_03751	3077.91	Mechanosensitive channel that opens in response to membrane tension and specific ionic conditions. Requires high concentrations of external K( ), NH(4)( ), Rb( ) or Cs( ) to gate. May participate in the regulation of osmotic pressure changes within the cell, although it does not appear to have a major role in osmolarity regulation. Forms an ion channel of 1.0 nanosiemens conductance. The channel …	kefA	TRUE	TRUE	COG1196@2|Bacteria,3XMHD@561|Escherichia,COG3264@2|Bacteria,1RMYY@1236|Gammaproteobacteria,1MWSA@1224|Proteobacteria,COG3264@1|root,COG1196@1|root			D,M
GUT_GENOME030434_00476	1461.54	Catalyzes the proton-dependent transport of sialic acid	nanT	TRUE	TRUE	COG0477@1|root,COG2814@2|Bacteria,1RZ3Z@1236|Gammaproteobacteria,1MWKH@1224|Proteobacteria			E,G,P,R
GUT_GENOME030434_01378	1153.61	Na( ) H( ) antiporter that extrudes sodium in exchange for external protons	nhaA	TRUE	TRUE	COG3004@2|Bacteria,COG3004@1|root,3XMTC@561|Escherichia,1RNDE@1236|Gammaproteobacteria,1MW15@1224|Proteobacteria			C,P
GUT_GENOME030504_01055	1611.36	Methyl-accepting chemotaxis protein II	tar	TRUE	TRUE	1RMH0@1236|Gammaproteobacteria,COG0840@1|root,1MU9B@1224|Proteobacteria,COG0840@2|Bacteria,3XMD1@561|Escherichia			N,T
GUT_GENOME030504_01693	435.485	NDH-1 shuttles electrons from NADH, via FMN and iron- sulfur (Fe-S) centers, to quinones in the respiratory chain	nuoF	TRUE	TRUE	1MV8F@1224|Proteobacteria,COG1894@2|Bacteria,COG1894@1|root,1RMUD@1236|Gammaproteobacteria,3XNXF@561|Escherichia	2293		C	1	1
GUT_GENOME030504_02240	1264.74	Belongs to the citrate synthase family	gltA	TRUE	TRUE	1MUKX@1224|Proteobacteria,1RNDK@1236|Gammaproteobacteria,COG0372@1|root,COG0372@2|Bacteria,3XMKA@561|Escherichia			C
GUT_GENOME030504_02689	422.768			TRUE	TRUE		1459			0.958333	1
GUT_GENOME030504_03559	655.949	Metal dependent phosphohydrolases with conserved 'HD' motif.	yedJ	TRUE	TRUE	COG1418@1|root,1RR38@1236|Gammaproteobacteria,3XM7Y@561|Escherichia,1RB2W@1224|Proteobacteria,COG1418@2|Bacteria			J,R
GUT_GENOME030504_03883	597.455	Component of the transport system for branched-chain amino acids	brnQ	TRUE	TRUE	COG1309@1|root,1RA4T@1224|Proteobacteria,1RNQH@1236|Gammaproteobacteria,COG1309@2|Bacteria,3XP6H@561|Escherichia			K
GUT_GENOME030504_04118	534.08	YniB-like protein	yniB	TRUE	TRUE	28IJC@1|root,1QISB@1224|Proteobacteria,1RP93@1236|Gammaproteobacteria,2Z8K9@2|Bacteria,3XNS4@561|Escherichia
GUT_GENOME030626_00987	441	CbeA_antitoxin, type IV, cytoskeleton bundling-enhancing factor A	yeeU	TRUE	TRUE	32FUR@2|Bacteria,2BMAS@1|root,1S8EC@1236|Gammaproteobacteria,1RI9Y@1224|Proteobacteria	747			1	1
GUT_GENOME030626_02622	1033.6	catalyzes the demethylation of specific methylglutamate residues introduced into the chemoreceptors (methyl-accepting chemotaxis proteins) by CheR	cheB	TRUE	TRUE	COG2201@1|root,1RN67@1236|Gammaproteobacteria,1MWCN@1224|Proteobacteria,COG2201@2|Bacteria,3XNVQ@561|Escherichia			N,T
GUT_GENOME030626_02692	1504.13	UPF0053 inner membrane protein YoaE	yoaE	TRUE	TRUE	1RMTY@1236|Gammaproteobacteria,COG1253@2|Bacteria,COG1253@1|root,1QTUN@1224|Proteobacteria,3XNWV@561|Escherichia			P,R
GUT_GENOME030626_03136	876.434	Permease protein	sapC	TRUE	TRUE	COG4171@1|root,3XPG2@561|Escherichia,1T1RQ@1236|Gammaproteobacteria,1QUAT@1224|Proteobacteria,COG4171@2|Bacteria			V
GUT_GENOME030678_00319	890.211	DNA polymerase III is a complex, multichain enzyme responsible for most of the replicative synthesis in bacteria. This DNA polymerase also exhibits 3' to 5' exonuclease activity. The alpha chain is the DNA polymerase	dnaE	FALSE	TRUE	1MUIF@1224|Proteobacteria,1RP0K@1236|Gammaproteobacteria,3XMAZ@561|Escherichia,COG0587@1|root,COG0587@2|Bacteria	795		L	0	0.5
GUT_GENOME030678_00772	280.071	domain protein	yybT	TRUE	TRUE	2484R@186801|Clostridia,3WH8C@541000|Ruminococcaceae,COG3887@1|root,COG3887@2|Bacteria,1TPGP@1239|Firmicutes			T
GUT_GENOME030678_02650	234	homolog of Blt101	yqaE	TRUE	TRUE	COG0401@2|Bacteria,COG0401@1|root,1SCD8@1236|Gammaproteobacteria,1N7K3@1224|Proteobacteria			C
GUT_GENOME030678_02799	1187.06	Transports nucleosides with a high affinity except guanosine and deoxyguanosine. Driven by a proton motive force	nupC	TRUE	TRUE	1MXXX@1224|Proteobacteria,1RMBX@1236|Gammaproteobacteria,COG1972@1|root,COG1972@2|Bacteria,3XM5K@561|Escherichia			F,U
GUT_GENOME030678_03200	615.219	UPF0126 domain	yicG	TRUE	TRUE	COG2860@2|Bacteria,3XMVT@561|Escherichia,COG2860@1|root,1S00T@1236|Gammaproteobacteria,1R9H8@1224|Proteobacteria
GUT_GENOME030828_03544	484.25	hyperosmotic response	osmY	TRUE	TRUE	1PCIJ@1224|Proteobacteria,1RRGP@1236|Gammaproteobacteria,3XN0N@561|Escherichia,COG2823@1|root,COG2823@2|Bacteria			M
[truncated: 4,834 more rows]

## Sheet: README
Supplemental Table S3: Details about gene content of E. coli strain-6 vs. strain-9 in UCFMT. Includes a row for each gene family found in either high-engraftment strain. Columns include gene annotations, mean length across members of the gene family, co-occurence cluster assignment and the fraction of other co-occurence cluster members also found in each strain.
